# Supplementary material for: Visible-light promoted α-alkylation of glycine derivatives with alkyl boronic acids
Source: Royal Society of Chemistry journal article supplement (doi:10.1039/d0cc07688k), 2021-01-01

Part C and Part D of **Scheme 5**. Control Experiments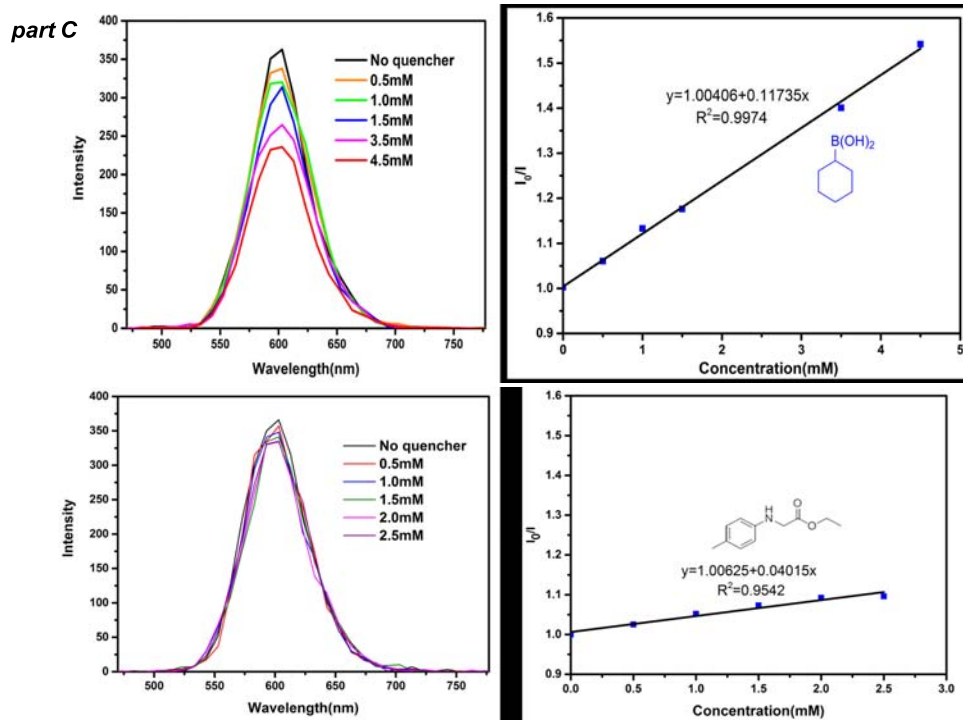**part D**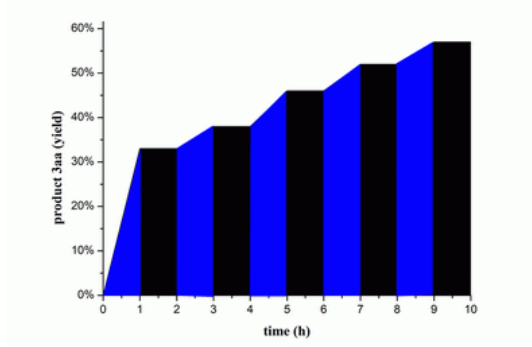

## General Information

The starting materials, reagents and solvents, purchased from commercial suppliers, were used without further purification. Literature procedures were used for the preparation of glycine derivatives (*PNAS*, 2009, **106**, 4106). Analytical TLC was performed with silica gel GF254 plates, and the products were visualized by UV detection. Flash chromatography was carried out using silica gel 200–300. <sup>1</sup>HNMR (400 MHz or 600 Hz) and <sup>13</sup>CNMR (150 MHz) spectra were measured with CDCl<sub>3</sub> as solvent. All chemical shifts ( $\delta$ ) are reported in ppm and coupling constants (*J*) in Hz. High resolution mass spectra (HR-MS) were recorded under electrospray ionization (ESI) conditions.

## General procedure for the visible-light promoted C-H alkylation of glycine derivatives with alkyl boronic acids

To a dried reaction tube (10 mL) with a magnetic stirring bar were added glycine esters (**1**, 0.2 mmol), alkyl boronic acids (**2**, 0.4 mmol), Ru(bpy)<sub>3</sub>(PF<sub>6</sub>)<sub>2</sub> (1 mol %), CuCl (10 mol %) and DCM (2 mL) successively under oxygen atmosphere (O<sub>2</sub> balloon). The resulting reaction mixture was performed at room temperature under blue LEDs irradiation (6 W) for 8-14 hours. After the reaction was completed, the reaction mixture was concentrated under reduced pressure, and the residue was purified by column chromatography to afford the desired compounds **3** (ethyl acetate/petroleum ether = 1:40 to 1:15).

## Scale-up experiment

To a dried reaction tube (50 mL) with a magnetic stirring bar were added glycine esters (**1n**, 10 mmol), alkyl boronic acids (**2a**, 20 mmol), Ru(bpy)<sub>3</sub>(PF<sub>6</sub>)<sub>2</sub> (1 mol %), CuCl (10 mol %) and DCM (30 mL) successively under oxygen atmosphere (O<sub>2</sub> balloon). The resulting reaction mixture was performed at room temperature under blue LEDs irradiation (24 W) for 10 hours. After the reaction was completed, the reaction mixture was concentrated under reduced pressure, and the residue was purified by column chromatography to afford the desired compounds **3na** (1.8 g, 62% yield, ethyl acetate/petroleum ether = 1:40).

## Photos of reaction set-up

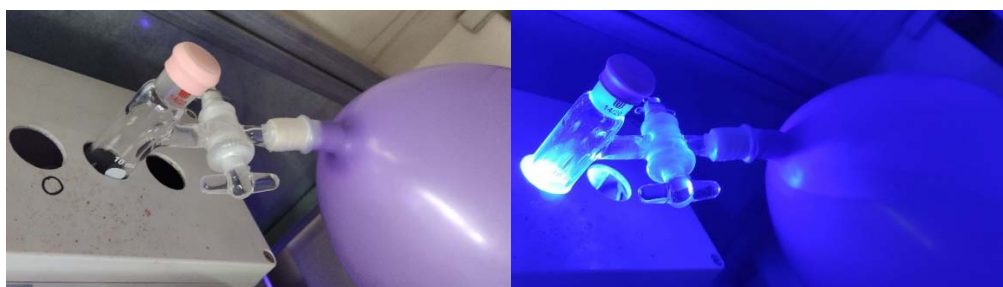

### Characterization of the products

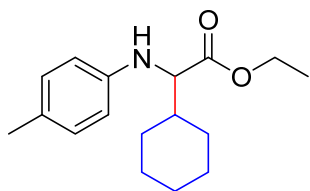

**Ethyl 2-cyclohexyl-2-(p-tolylamino)acetate (3aa).** The desired pure product was obtained in 71% yield (39.5 mg) as a yellow oil.  $^1\text{H NMR}$  (600 MHz,  $\text{CDCl}_3$ )  $\delta$  6.96 (d,  $J = 8.0$  Hz, 2H), 6.54 (d,  $J = 8.4$  Hz, 2H), 4.15 (q,  $J = 7.1$  Hz, 2H), 3.81 (d,  $J = 6.2$  Hz, 1H), 2.21 (s, 3H), 1.88 – 1.63 (m, 7H), 1.30 – 1.26 (m, 1H), 1.23 (t,  $J = 7.1$  Hz, 3H), 1.21 – 1.11 (m, 3H).  $^{13}\text{C NMR}$  (150 MHz,  $\text{CDCl}_3$ )  $\delta$  173.8, 145.2, 129.7, 127.3, 113.7, 62.4, 60.7, 41.3, 29.6, 29.2, 26.2, 26.1, 26.0, 20.3, 14.3. HRMS (ESI) exact mass calcd for  $\text{C}_{17}\text{H}_{26}\text{NO}_2$   $[\text{M}+\text{H}]$   $m/z$  276.1958, found 276.1951.

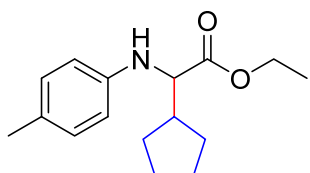

**Ethyl 2-cyclopentyl-2-(p-tolylamino)acetate (3ab).** The desired pure product was obtained in 58% yield (30.5 mg) as a yellow oil.  $^1\text{H NMR}$  (400 MHz,  $\text{CDCl}_3$ )  $\delta$  6.97 (d,  $J = 8.1$  Hz, 2H), 6.56 (d,  $J = 8.4$  Hz, 2H), 4.15 (q,  $J = 7.1$  Hz, 2H), 3.82 (d,  $J = 7.9$  Hz, 1H), 2.22 (s, 3H), 1.96 – 1.39 (m, 9H), 1.23 (t,  $J = 7.1$  Hz, 3H).  $^{13}\text{C NMR}$  (150 MHz,  $\text{CDCl}_3$ )  $\delta$  174.3, 145.1, 129.7, 127.4, 113.7, 61.3, 60.7, 43.2, 29.4, 29.0, 25.3, 25.1, 20.4, 14.3. HRMS (ESI) exact mass calcd for  $\text{C}_{16}\text{H}_{24}\text{NO}_2$   $[\text{M}+\text{H}]$   $m/z$  262.1802, found 262.1800.

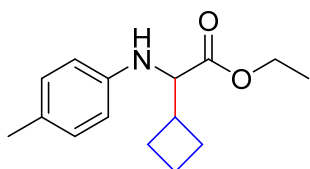

**Ethyl 2-cyclobutyl-2-(p-tolylamino)acetate (3ac).** The desired pure product was obtained in 42% yield (23.5 mg) as a yellow oil.  $^1\text{H NMR}$  (400 MHz,  $\text{CDCl}_3$ )  $\delta$  6.98 (d,  $J = 8.1$  Hz, 2H), 6.55 (d,  $J = 8.4$  Hz, 2H), 4.15 (q,  $J = 7.1$  Hz, 2H), 3.92 (s, 1H), 2.67 – 2.57 (m, 1H), 2.23 (s, 3H), 2.11 – 1.74 (m, 6H), 1.23 (t,  $J = 7.1$  Hz, 3H).  $^{13}\text{C NMR}$  (150 MHz,  $\text{CDCl}_3$ )  $\delta$  173.5, 145.1, 129.7, 127.5, 113.7, 61.5, 60.7, 38.4,

25.4, 24.8, 20.4, 18.1, 14.3. HRMS (ESI) exact mass calcd for  $C_{15}H_{22}NO_2$  [M+H]  $m/z$  248.1645, found 248.1642.

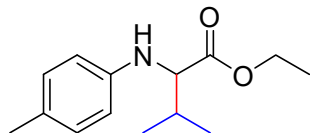

**Ethyl *p*-tolylvalinate (3ad).** The desired pure product was obtained in 62% yield (29.3 mg) as a yellow oil.  $^1H$  NMR (400 MHz,  $CDCl_3$ )  $\delta$  6.98 (d,  $J = 8.0$  Hz, 2H), 6.57 (d,  $J = 8.3$  Hz, 2H), 4.17 (q,  $J = 7.1$  Hz, 2H), 3.82 (d,  $J = 5.8$  Hz, 1H), 2.23 (s, 3H), 2.12 – 2.02 (m, 1H), 1.25 (t,  $J = 7.2$  Hz, 3H), 1.05 (d,  $J = 6.9$  Hz, 3H), 1.02 (d,  $J = 6.8$  Hz, 3H).  $^{13}C$  NMR (150 MHz,  $CDCl_3$ )  $\delta$  173.8, 145.1, 129.7, 127.4, 113.8, 62.9, 60.7, 31.5, 20.4, 19.1, 18.7, 14.3. HRMS (ESI) exact mass calcd for  $C_{14}H_{22}NO_2$  [M+H]  $m/z$  236.1645, found 236.1647.

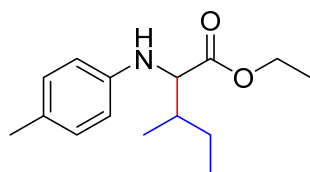

**Ethyl 3-methyl-2-(*p*-tolylamino)pentanoate (3ae).** The desired pure product was obtained in 61% yield (28.9 mg) as a yellow oil.  $^1H$  NMR (400 MHz,  $CDCl_3$ )  $\delta$  6.98 (d,  $J = 8.5$  Hz, 2H), 6.57 (d,  $J = 8.3$  Hz, 2H), 4.17 (q,  $J = 7.1$  Hz, 2H), 3.93 (dd,  $J = 20.6, 5.5$  Hz, 1H), 1.96 – 1.82 (m, 1H), 1.71 – 1.50 (m, 1H), 1.36 – 1.29 (m, 1H), 1.25 (t,  $J = 7.1$  Hz, 3H), 1.01 (d,  $J = 6.9$  Hz, 3H), 0.96 (t,  $J = 8.5$  Hz, 3H).  $^{13}C$  NMR (150 MHz,  $CDCl_3$ )  $\delta$  174.0, 145.2, 129.7, 127.4, 113.8, 61.6, 60.7, 38.0, 26.2, 20.4, 15.5, 14.3, 11.7. HRMS (ESI) exact mass calcd for  $C_{15}H_{24}NO_2$  [M+H]  $m/z$  250.1802, found 250.1801.

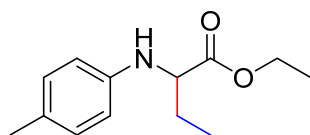

**Ethyl 2-(*p*-tolylamino)butanoate (3af).** The desired pure product was obtained in 52% yield (23.2 mg) as a yellow oil.  $^1H$  NMR (400 MHz,  $CDCl_3$ )  $\delta$  6.98 (d,  $J = 8.3$  Hz, 2H), 6.55 (d,  $J = 8.4$  Hz, 2H), 4.18 (q,  $J = 7.1$  Hz, 2H), 3.98 (t,  $J = 6.3$  Hz, 1H), 2.23 (s, 3H), 1.95 – 1.71 (m, 2H), 1.25 (t,  $J = 7.1$  Hz, 3H), 1.00 (t,  $J = 7.4$  Hz, 3H).  $^{13}C$  NMR (150 MHz,  $CDCl_3$ )  $\delta$  174.1, 144.6, 129.8, 127.4, 113.7, 60.9, 58.2,

26.1, 20.4, 14.2, 9.9. HRMS (ESI) exact mass calcd for  $C_{13}H_{20}NO_2$   $[M+H]^+$   $m/z$  222.1489, found 222.1493.

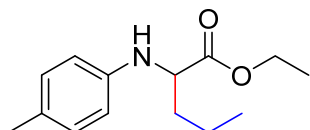

**Ethyl 2-(p-tolylamino)pentanoate (3ag).** The desired pure product was obtained in 64% yield (30.2 mg) as a yellow oil.  $^1H$  NMR (400 MHz,  $CDCl_3$ )  $\delta$  6.97 (d,  $J = 7.8$  Hz, 2H), 6.54 (d,  $J = 6.8$  Hz, 2H), 4.16 (q,  $J = 7.2$  Hz, 2H), 4.01 (t,  $J = 6.1$  Hz, 1H), 2.22 (s, 3H), 1.88 – 1.63 (m, 2H), 1.55 – 1.35 (m, 2H), 1.24 (t,  $J = 7.1$  Hz, 3H), 0.94 (t,  $J = 7.4$  Hz, 3H).  $^{13}C$  NMR (150 MHz,  $CDCl_3$ )  $\delta$  174.4, 144.6, 129.8, 127.5, 113.7, 60.9, 56.9, 35.2, 20.4, 18.9, 14.2, 13.8. HRMS (ESI) exact mass calcd for  $C_{14}H_{22}NO_2$   $[M+H]^+$   $m/z$  236.1645, found 236.1650.

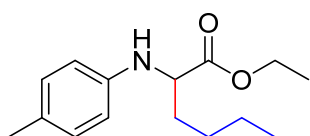

**Ethyl 2-(phenylamino)hexanoate (3ah).** The desired pure product was obtained in 65% yield (32.3 mg) as a yellow oil.  $^1H$  NMR (400 MHz,  $CDCl_3$ )  $\delta$  6.97 (d,  $J = 8.1$  Hz, 2H), 6.55 (d,  $J = 6.8$  Hz, 2H), 4.17 (q,  $J = 7.1$  Hz, 2H), 4.00 (t,  $J = 6.5$  Hz, 1H), 2.23 (s, 3H), 1.92 – 1.56 (m, 2H), 1.45 – 1.30 (m, 4H), 1.24 (t,  $J = 7.1$  Hz, 3H), 0.90 (t,  $J = 7.1$  Hz, 3H).  $^{13}C$  NMR (150 MHz,  $CDCl_3$ )  $\delta$  174.4, 144.7, 129.8, 127.4, 113.7, 60.8, 57.0, 32.9, 27.7, 22.4, 20.4, 14.2, 13.9. HRMS (ESI) exact mass calcd for  $C_{15}H_{24}NO_2$   $[M+H]^+$   $m/z$  250.1802, found 250.1806.

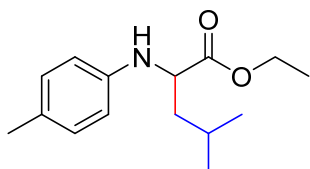

**Ethyl p-tolylleucinate (3ai).** The desired pure product was obtained in 65% yield (32.4 mg) as a yellow oil.  $^1H$  NMR (400 MHz,  $CDCl_3$ )  $\delta$  6.97 (d,  $J = 8.0$  Hz, 2H), 6.55 (d,  $J = 8.4$  Hz, 2H), 4.15 (q,  $J = 7.1$  Hz, 2H), 4.04 (s, 1H), 3.85 (s, 1H), 2.23 (s, 3H), 1.91 – 1.72 (m, 1H), 1.65 – 1.60 (m, 2H), 1.23 (t,  $J = 7.1$  Hz, 3H), 0.99 (d,  $J = 6.6$  Hz, 3H), 0.94 (d,  $J = 6.6$  Hz, 3H).  $^{13}C$  NMR (150 MHz,  $CDCl_3$ )  $\delta$  174.9,

144.7, 129.8, 127.5, 113.7, 60.8, 55.6, 42.4, 24.9, 22.7, 22.2, 20.4, 14.2. HRMS (ESI) exact mass calcd for  $C_{15}H_{24}NO_2$   $[M+H]$   $m/z$  250.1802, found 250.1800.

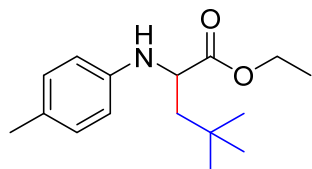

**Ethyl 4,4-dimethyl-2-(p-tolylamino)pentanoate (3aj).** The desired pure product was obtained in 62% yield (32.5 mg) as a yellow oil.  $^1H$  NMR (400 MHz,  $CDCl_3$ )  $\delta$  6.98 (d,  $J = 8.5$  Hz, 2H), 6.55 (d,  $J = 8.4$  Hz, 2H), 4.21 – 4.08 (m, 2H), 4.05 (s, 1H), 3.77 (s, 1H), 2.23 (s, 3H), 1.76 (dd,  $J = 14.2, 5.0$  Hz, 1H), 1.58 (dd,  $J = 14.2, 7.4$  Hz, 1H), 1.22 (t,  $J = 7.1$  Hz, 3H), 1.00 (s, 9H).  $^{13}C$  NMR (150 MHz,  $CDCl_3$ )  $\delta$  175.1, 144.5, 129.7, 127.5, 113.7, 60.8, 54.9, 47.0, 30.7, 29.8, 20.4, 14.1. HRMS (ESI) exact mass calcd for  $C_{16}H_{26}NO_2$   $[M+H]$   $m/z$  264.1958, found 264.1963.

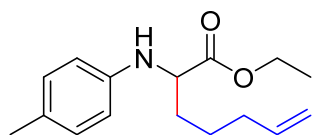

**Ethyl 2-(p-tolylamino)hept-6-enoate (3ak).** The desired pure product was obtained in 53% yield (27.3 mg) as a yellow oil.  $^1H$  NMR (400 MHz,  $CDCl_3$ )  $\delta$  6.98 (d,  $J = 0.6$  Hz, 2H), 6.55 (d,  $J = 8.4$  Hz, 2H), 5.89 – 5.64 (m, 1H), 5.13 – 4.91 (m, 2H), 4.18 (q,  $J = 7.1$  Hz, 2H), 4.04 (s, 1H), 4.02 (d,  $J = 6.8$  Hz, 1H), 2.24 (s, 3H), 2.15 – 2.04 (m, 2H), 1.90 – 1.71 (m, 2H), 1.61 – 1.51 (m, 2H), 1.25 (t,  $J = 7.1$  Hz, 3H).  $^{13}C$  NMR (150 MHz,  $CDCl_3$ )  $\delta$  174.3, 144.6, 138.1, 129.8, 127.5, 115.0, 113.7, 60.9, 56.9, 33.3, 32.5, 24.8, 20.4, 14.2. HRMS (ESI) exact mass calcd for  $C_{16}H_{24}NO_2$   $[M+H]$   $m/z$  262.1802, found 262.1804.

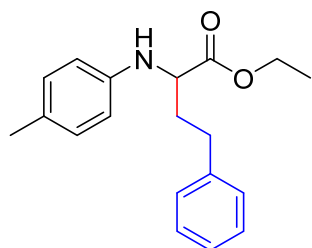

**Ethyl 4-phenyl-2-(p-tolylamino)butanoate (3al).** The desired pure product was obtained in 70% yield (41.4 mg) as a yellow oil.  $^1\text{H}$  NMR (400 MHz,  $\text{CDCl}_3$ )  $\delta$  7.32 – 7.27 (m, 2H), 7.23 – 7.18 (m, 3H), 6.98 (d,  $J = 8.0$  Hz, 2H), 6.52 (d,  $J = 8.5$  Hz, 2H), 4.16 (q,  $J = 7.1$  Hz, 2H), 4.03 (d,  $J = 5.8$  Hz, 2H), 2.77 (t,  $J = 7.9$  Hz, 2H), 2.23 (s, 3H), 2.21 – 2.11 (m, 1H), 2.09 – 1.99 (m, 1H), 1.25 (t,  $J = 7.1$  Hz, 3H).  $^{13}\text{C}$  NMR (150 MHz,  $\text{CDCl}_3$ )  $\delta$  174.1, 144.5, 141.0, 129.8, 128.5, 128.4, 127.6, 126.1, 113.8, 61.0, 56.5, 34.7, 31.8, 20.4, 14.2. HRMS (ESI) exact mass calcd for  $\text{C}_{19}\text{H}_{24}\text{NO}_2$   $[\text{M}+\text{H}]$   $m/z$  298.1802, found 298.1798.

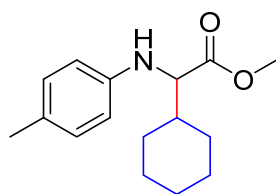

**Methyl 2-cyclohexyl-2-(p-tolylamino)acetate (3ba).** The desired pure product was obtained in 62% yield (32.3 mg) as a yellow oil.  $^1\text{H}$  NMR (600 MHz,  $\text{CDCl}_3$ )  $\delta$  6.97 (d,  $J = 8.0$  Hz, 2H), 6.54 (d,  $J = 8.4$  Hz, 2H), 3.98 (s, 1H), 3.84 (d,  $J = 6.2$  Hz, 1H), 3.69 (s, 3H), 2.22 (s, 3H), 1.89 – 1.58 (m, 6H), 1.30 – 1.08 (m, 5H).  $^{13}\text{C}$  NMR (150 MHz,  $\text{CDCl}_3$ )  $\delta$  174.4, 145.1, 129.8, 127.4, 113.7, 62.4, 51.7, 41.3, 29.7, 29.2, 26.2, 26.1, 26.0, 20.4. HRMS (ESI) exact mass calcd for  $\text{C}_{16}\text{H}_{24}\text{NO}_2$   $[\text{M}+\text{H}]$   $m/z$  262.1802, found 262.1805.

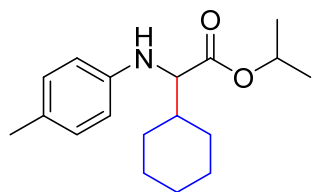

**Isopropyl 2-cyclohexyl-2-(p-tolylamino)acetate (3ca).** The desired pure product was obtained in 59% yield (32.4 mg) as a yellow oily liquid.  $^1\text{H}$  NMR (400 MHz,  $\text{CDCl}_3$ )  $\delta$  6.97 (d,  $J = 7.8$  Hz, 2H), 6.56 (d,  $J = 8.3$  Hz, 2H), 5.17 – 4.72 (m, 1H), 4.03 (s, 1H), 3.80 (d,  $J = 5.9$  Hz, 1H), 2.23 (s, 3H), 1.92 – 1.61 (m, 6H), 1.28 (d,  $J = 6.2$  Hz, 2H), 1.22 (t,  $J = 7.2$  Hz, 7H), 1.19 – 1.11 (m, 2H).  $^{13}\text{C}$  NMR (151 MHz,  $\text{CDCl}_3$ )  $\delta$  173.3, 145.2, 129.7, 127.2, 113.8, 68.3, 62.5, 41.3, 29.6, 29.2, 26.2, 26.1, 26.0, 21.9, 21.9, 20.4. HRMS (ESI) exact mass calcd for  $\text{C}_{18}\text{H}_{28}\text{NO}_2$   $[\text{M}+\text{H}]$   $m/z$  290.2115, found 290.2116.



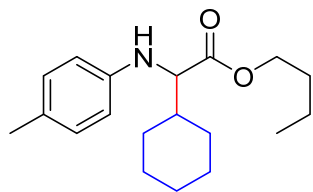

**Butyl 2-cyclohexyl-2-(p-tolylamino)acetate (3da).** The desired pure product was obtained in 59% yield (34.4 mg) as a red oil.  $^1\text{H}$  NMR (400 MHz,  $\text{CDCl}_3$ )  $\delta$  6.97 (d,  $J = 8.5$  Hz, 2H), 6.55 (d,  $J = 8.4$  Hz, 2H), 4.10 (t,  $J = 6.7$  Hz, 2H), 4.00 (s, 1H), 3.83 (d,  $J = 6.1$  Hz, 1H), 2.23 (s, 3H), 1.90 – 1.63 (m, 7H), 1.64 – 1.54 (m, 2H), 1.39 – 1.29 (m, 2H), 1.29 – 1.12 (m, 4H), 0.91 (t,  $J = 7.4$  Hz, 3H).  $^{13}\text{C}$  NMR (150 MHz,  $\text{CDCl}_3$ )  $\delta$  174.0, 145.2, 129.7, 127.3, 113.7, 64.6, 62.5, 41.3, 30.6, 29.6, 29.2, 26.2, 26.1, 26.0, 20.3, 19.1, 13.6. HRMS (ESI) exact mass calcd for  $\text{C}_{19}\text{H}_{30}\text{NO}_2$   $[\text{M}+\text{H}]$   $m/z$  304.2271, found 304.2274.

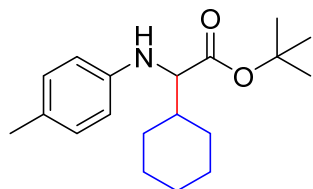

**Tert-butyl 2-cyclohexyl-2-(p-tolylamino)acetate (3ea).** The desired pure product was obtained in 50% yield (29.4 mg) as a red oil.  $^1\text{H}$  NMR (400 MHz,  $\text{CDCl}_3$ )  $\delta$  6.97 (d,  $J = 8.0$  Hz, 2H), 6.55 (d,  $J = 8.4$  Hz, 2H), 4.00 (s, 1H), 3.72 (d,  $J = 5.7$  Hz, 1H), 2.23 (s, 3H), 1.86 – 1.62 (m, 6H), 1.42 (s, 9H), 1.27 – 1.12 (m, 5H).  $^{13}\text{C}$  NMR (150 MHz,  $\text{CDCl}_3$ )  $\delta$  173.0, 145.4, 129.6, 127.0, 113.7, 81.3, 62.8, 41.3, 29.5, 29.1, 28.1, 26.3, 26.2, 26.1, 20.4. HRMS (ESI) exact mass calcd for  $\text{C}_{19}\text{H}_{30}\text{NO}_2$   $[\text{M}+\text{H}]$   $m/z$  304.2271, found 304.2277.

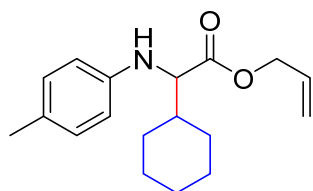

**Allyl 2-cyclohexyl-2-(p-tolylamino)acetate (3fa).** The desired pure product was obtained in 40% yield (19.8 mg) as a yellow oil.  $^1\text{H}$  NMR (400 MHz,  $\text{CDCl}_3$ )  $\delta$  6.97 (d,  $J = 8.4$  Hz, 2H), 6.55 (d,  $J = 8.4$  Hz, 2H), 6.00 – 5.76 (m, 1H), 5.28 (dd,  $J = 12.7, 7.1, 1.3$  Hz, 2H), 4.60 (d,  $J = 5.8$  Hz, 2H), 3.99 (s, 1H), 3.87 (s, 1H), 2.22 (s, 3H), 1.90 – 1.62 (m, 6H), 1.29 – 1.11 (m, 5H).  $^{13}\text{C}$  NMR (150 MHz,  $\text{CDCl}_3$ )  $\delta$  173.5, 145.1, 131.9, 129.7, 127.4, 118.6, 113.7, 65.3, 62.5, 41.3, 29.7, 29.1, 26.2, 26.1, 26.0, 20.4. HRMS (ESI) exact mass calcd for  $\text{C}_{18}\text{H}_{26}\text{NO}_2$   $[\text{M}+\text{H}]$   $m/z$  288.1958, found 288.1961.

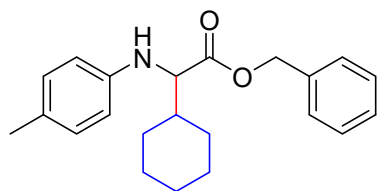

**Benzyl 2-cyclohexyl-2-(p-tolylamino)acetate (3ga).** The desired pure product was obtained in 54% yield (36.1 mg) as a red oil.  $^1\text{H}$  NMR (400 MHz,  $\text{CDCl}_3$ )  $\delta$  7.47 – 7.28 (m, 5H), 6.99 (d,  $J = 8.0$  Hz, 2H), 6.58 (d,  $J = 8.4$  Hz, 2H), 5.16 (s, 2H), 4.04 (d,  $J = 9.1$  Hz, 1H), 3.97 – 3.90 (m, 1H), 2.26 (s, 3H), 1.91 – 1.64 (m, 6H), 1.28 – 1.14 (m, 5H).  $^{13}\text{C}$  NMR (100 MHz,  $\text{CDCl}_3$ )  $\delta$  174.1, 145.4, 135.9, 130.1, 128.8, 128.6, 128.5, 127.7, 114.1, 66.8, 62.8, 41.6, 29.9, 29.4, 26.4, 26.32, 26.3, 20.7. HRMS (ESI) exact mass calcd for  $\text{C}_{22}\text{H}_{28}\text{NO}_2$   $[\text{M}+\text{H}]$   $m/z$  338.2115, found 338.2119.

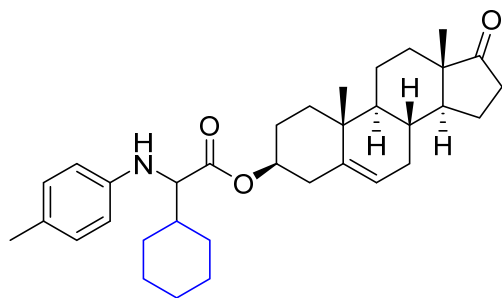

**(3S,8R,9S,10R,13S,14S)-10,13-dimethyl-17-oxo-2,3,4,7,8,9,10,11,12,13,14,15,16,17-tetradecahydro-1H-cyclopenta[a]phenanthren-3-yl 2-cyclohexyl-2-(p-tolylamino)acetate (3ha).** The desired pure product was obtained in 51% yield (54.7 mg) as a red oil.  $^1\text{H}$  NMR (600 MHz,  $\text{CDCl}_3$ )  $\delta$  6.96 (dd,  $J = 8.2, 1.6$  Hz, 2H), 6.54 (d,  $J = 8.4$  Hz, 2H), 5.39 (t,  $J = 5.0$  Hz, 1H), 4.67 – 4.62 (m, 1H), 4.00 (s, 1H), 3.82 (d,  $J = 36.9$  Hz, 1H), 2.45 (dd,  $J = 19.3, 8.7$  Hz, 1H), 2.38 – 2.27 (m, 2H), 2.22 (s, 3H), 2.14 – 2.04 (m, 2H), 1.98 – 1.91 (m, 1H), 1.87 – 1.45 (m, 14H), 1.33 – 1.11 (m, 9H), 1.05 (s, 3H), 0.88 (s, 3H).  $^{13}\text{C}$  NMR (150 MHz,  $\text{CDCl}_3$ )  $\delta$  220.9, 173.2, 145.2, 139.7, 129.7, 127.2, 122.0, 113.7, 74.2, 62.5, 51.7, 50.1, 47.5, 41.3, 38.1, 36.8, 36.7, 35.8, 31.4, 31.4, 30.7, 29.6, 29.2, 27.8, 26.2, 26.1, 26.06, 21.9, 20.4, 20.3, 19.3, 13.5. HRMS (ESI) exact mass calcd for  $\text{C}_{34}\text{H}_{48}\text{NO}_3$   $[\text{M}+\text{H}]$   $m/z$  518.3629, found 518.3625.

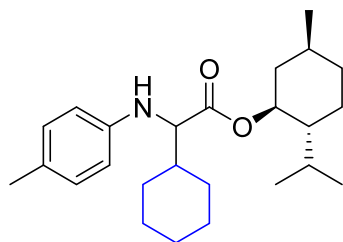

**(1S,2R,5S)-2-isopropyl-5-methylcyclohexyl 2-cyclohexyl-2-(p-tolylamino)acetate (3ia).** The desired pure product was obtained in 61% yield (48.6 mg) as a red oil.  $^1\text{H}$  NMR (400 MHz,  $\text{CDCl}_3$ )  $\delta$  6.95 (d,  $J = 8.4$  Hz, 2H), 6.55 (d,  $J = 8.4$  Hz, 2H), 4.72 – 4.60 (m, 1H), 3.95 (d,  $J = 9.0$  Hz, 1H), 3.83 – 3.74 (m, 1H), 2.22 (s, 3H), 1.99 – 1.60 (m, 11H), 1.50 – 1.10 (m, 8H), 0.88 (d,  $J = 6.5$  Hz, 3H), 0.85 (d,  $J = 7.0$  Hz, 3H), 0.62 (d,  $J = 6.9$  Hz, 3H).  $^{13}\text{C}$  NMR (150 MHz,  $\text{CDCl}_3$ )  $\delta$  173.5, 145.2, 129.6, 127.4, 114.1, 74.9, 62.8, 46.9, 41.3, 40.8, 34.2, 31.4, 29.6, 29.4, 26.3, 26.1, 26.0, 25.9, 23.1, 22.0, 20.8, 20.4, 15.9. HRMS (ESI) exact mass calcd for  $\text{C}_{25}\text{H}_{40}\text{NO}_2$  [ $\text{M}+\text{H}$ ]  $m/z$  386.3054, found 386.3053.

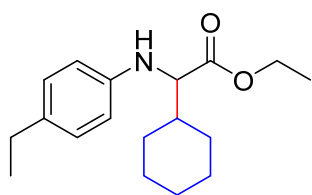

**Ethyl 2-cyclohexyl-2-((4-ethylphenyl)amino)acetate (3ja).** The desired pure product was obtained in 63% yield (36.5 mg) as a red oil.  $^1\text{H}$  NMR (400 MHz,  $\text{CDCl}_3$ )  $\delta$  7.00 (d,  $J = 8.5$  Hz, 2H), 6.57 (d,  $J = 8.5$  Hz, 2H), 4.16 (q,  $J = 7.1$  Hz, 2H), 4.03 (s, 1H), 3.83 (d,  $J = 6.1$  Hz, 1H), 2.53 (q,  $J = 7.6$  Hz, 2H), 1.96 – 1.56 (m, 7H), 1.40 – 1.27 (m, 1H), 1.25 (t,  $J = 7.1$  Hz, 3H), 1.18 (t,  $J = 7.6$  Hz, 3H), 1.15 – 1.08 (m, 1H).  $^{13}\text{C}$  NMR (150 MHz,  $\text{CDCl}_3$ )  $\delta$  173.7, 145.4, 133.9, 128.5, 113.8, 62.5, 60.6, 41.4, 29.6, 29.2, 27.8, 26.2, 26.1, 26.06, 15.7, 14.2. HRMS (ESI) exact mass calcd for  $\text{C}_{18}\text{H}_{28}\text{NO}_2$  [ $\text{M}+\text{H}$ ]  $m/z$  290.2115, found 290.2115.

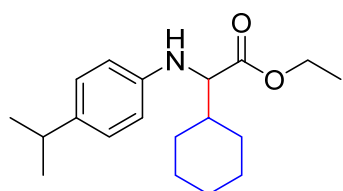

**Ethyl 2-cyclohexyl-2-((4-isopropylphenyl)amino)acetate (3ka)** The desired pure product was obtained in 61% yield (36.6 mg) as a red oil.  $^1\text{H}$  NMR (400 MHz,  $\text{CDCl}_3$ )  $\delta$  7.03 (d,  $J = 8.5$  Hz, 2H), 6.58 (d,  $J = 8.5$  Hz, 2H), 4.16 (q,  $J = 7.1$  Hz, 2H), 4.05 (s, 1H), 3.83 (d,  $J = 6.0$  Hz, 1H), 1.90 – 1.62 (m, 7H), 1.43

– 1.27 (m, 2H), 1.25 (t,  $J = 7.1$  Hz, 3H), 1.19 (d,  $J = 6.9$  Hz, 6H), 1.17 – 1.10 (m, 2H).  $^{13}\text{C}$  NMR (150 MHz,  $\text{CDCl}_3$ )  $\delta$  173.9, 145.5, 138.5, 127.1, 113.5, 62.3, 60.7, 41.4, 33.1, 29.6, 29.2, 26.2, 26.1, 26.0, 24.2, 24.1, 14.3. HRMS (ESI) exact mass calcd for  $\text{C}_{19}\text{H}_{30}\text{NO}_2$   $[\text{M}+\text{H}]$   $m/z$  304.2271, found 304.2276.

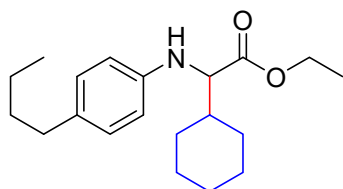

**Ethyl 2-((4-butylphenyl)amino)-2-cyclohexylacetate (3la).** The desired pure product was obtained in 62% yield (38.8 mg) as a red oil.  $^1\text{H}$  NMR (400 MHz,  $\text{CDCl}_3$ )  $\delta$  6.97 (d,  $J = 8.3$  Hz, 2H), 6.56 (d,  $J = 8.4$  Hz, 2H), 4.16 (q,  $J = 7.1$  Hz, 2H), 4.02 (s, 1H), 3.82 (d,  $J = 6.0$  Hz, 1H), 2.48 (t,  $J = 7.1$  Hz, 2H), 1.90 – 1.59 (m, 7H), 1.57 – 1.47 (m, 2H), 1.38 – 1.28 (m, 3H), 1.24 (t,  $J = 7.1$  Hz, 3H), 1.20 – 1.09 (m, 3H), 0.90 (t,  $J = 7.3$  Hz, 3H).  $^{13}\text{C}$  NMR (150 MHz,  $\text{CDCl}_3$ )  $\delta$  173.9, 145.3, 132.5, 129.1, 113.6, 62.4, 60.7, 41.3, 34.7, 33.9, 29.6, 29.2, 26.2, 26.1, 26.0, 22.3, 14.3, 14.0. HRMS (ESI) exact mass calcd for  $\text{C}_{20}\text{H}_{32}\text{NO}_2$   $[\text{M}+\text{H}]$   $m/z$  318.2428, found 318.2432.

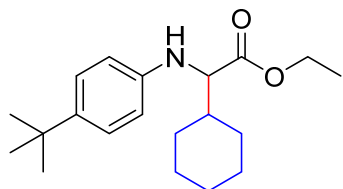

**Ethyl 2-((4-tert-butylphenyl)amino)-2-cyclohexylacetate (3ma).** The desired pure product was obtained in 58% yield (36.5 mg) as a red oil.  $^1\text{H}$  NMR (400 MHz,  $\text{CDCl}_3$ )  $\delta$  7.19 (d,  $J = 7.9$  Hz, 2H), 6.58 (d,  $J = 7.9$  Hz, 2H), 4.17 (q,  $J = 7.1$  Hz, 2H), 4.07 (s, 1H), 3.84 (d,  $J = 5.9$  Hz, 1H), 1.89 – 1.64 (m, 3H), 1.36 – 1.28 (m, 1H), 1.27 (s, 9H), 1.25 (t, 3H), 1.23 – 1.09 (m, 4H).  $^{13}\text{C}$  NMR (150 MHz,  $\text{CDCl}_3$ )  $\delta$  173.7, 145.1, 140.8, 125.9, 113.3, 62.4, 60.6, 41.4, 33.8, 31.5, 29.6, 29.2, 26.2, 26.1, 26.0, 14.2. HRMS (ESI) exact mass calcd for  $\text{C}_{20}\text{H}_{32}\text{NO}_2$   $[\text{M}+\text{H}]$   $m/z$  318.2428, found 318.2429.

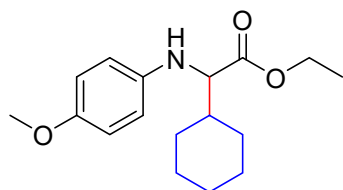

**Ethyl 2-cyclohexyl-2-((4-methoxyphenyl)amino)acetate (3na).** The desired pure product was obtained in 64% yield (37.3 mg) as a red oil.  $^1\text{H}$  NMR (400 MHz,  $\text{CDCl}_3$ )  $\delta$  6.75 (d,  $J = 8.7$  Hz, 2H), 6.60 (d,  $J = 8.7$  Hz, 2H), 4.14 (q,  $J = 7.1$  Hz, 2H), 3.87 (s, 1H), 3.76 (d,  $J = 5.9$  Hz, 1H), 3.72 (s, 3H), 2.02 – 1.56 (m, 7H), 1.34 – 1.25 (m, 1H), 1.22 (t,  $J = 7.1$  Hz, 3H), 1.19 – 1.11 (m, 3H).  $^{13}\text{C}$  NMR (150 MHz,  $\text{CDCl}_3$ )  $\delta$  174.0, 152.6, 141.6, 115.2, 114.8, 63.4, 60.7, 55.7, 41.3, 29.7, 29.2, 26.2, 26.1, 26.0, 14.3. HRMS (ESI) exact mass calcd for  $\text{C}_{17}\text{H}_{26}\text{NO}_3$  [ $\text{M}+\text{H}$ ]  $m/z$  292.1907, found 292.1910.

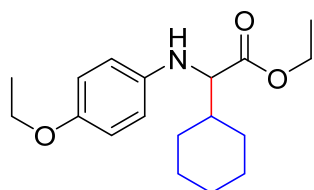

**Ethyl 2-cyclohexyl-2-((4-ethoxyphenyl)amino)acetate (3oa).** The desired pure product was obtained in 62% yield (32.7 mg) as a red oil.  $^1\text{H}$  NMR (400 MHz,  $\text{CDCl}_3$ )  $\delta$  6.74 (d,  $J = 9.0$  Hz, 2H), 6.58 (d,  $J = 9.0$  Hz, 2H), 4.14 (q,  $J = 6.8$  Hz, 2H), 3.94 (q,  $J = 7.0$  Hz, 2H), 3.85 (s, 1H), 3.75 (d,  $J = 5.8$  Hz, 1H), 1.90 – 1.63 (m, 7H), 1.36 (t,  $J = 7.0$  Hz, 3H), 1.32 – 1.24 (m, 2H), 1.22 (t,  $J = 7.1$  Hz, 3H), 1.18 – 1.09 (m, 2H).  $^{13}\text{C}$  NMR (150 MHz,  $\text{CDCl}_3$ )  $\delta$  174.0, 151.9, 141.6, 115.7, 115.2, 64.0, 63.4, 60.7, 41.3, 29.7, 29.2, 26.2, 26.1, 26.0, 15.0, 14.3. HRMS (ESI) exact mass calcd for  $\text{C}_{18}\text{H}_{28}\text{NO}_3$  [ $\text{M}+\text{H}$ ]  $m/z$  306.2064, found 306.2063.

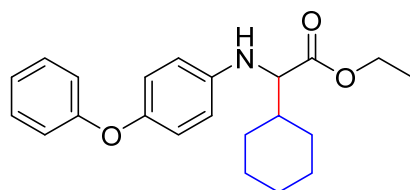

**Ethyl 2-cyclohexyl-2-((4-phenoxyphenyl)amino)acetate (3pa).** The desired pure product was obtained in 50% yield (35.5 mg) as a red oil.  $^1\text{H}$  NMR (400 MHz,  $\text{CDCl}_3$ )  $\delta$  7.28 (dd,  $J = 7.0, 1.6$  Hz, 1H), 7.25 (d,  $J = 2.6$  Hz, 1H), 7.00 (dd,  $J = 14.7, 0.8$  Hz, 1H), 6.92 (d,  $J = 8.5$  Hz, 2H), 6.89 (d,  $J = 8.8$  Hz, 2H), 6.62 (d,  $J = 8.8$  Hz, 2H), 4.18 (q,  $J = 7.1$  Hz, 2H), 4.06 (s, 1H), 3.81 (d,  $J = 6.1$  Hz, 1H), 1.92 – 1.65 (m, 6H), 1.42 – 1.28 (m, 2H), 1.25 (t,  $J = 7.1$  Hz, 3H), 1.23 – 1.10 (m, 3H).  $^{13}\text{C}$  NMR (150 MHz,  $\text{CDCl}_3$ )  $\delta$  173.7, 158.9, 148.3, 144.0, 129.5, 122.0, 121.1, 117.2, 114.7, 62.8, 60.8, 41.3, 29.6, 29.2, 26.2, 26.1, 26.0, 14.3. HRMS (ESI) exact mass calcd for  $\text{C}_{22}\text{H}_{28}\text{NO}_3$  [ $\text{M}+\text{H}$ ]  $m/z$  354.2064, found 354.2066.

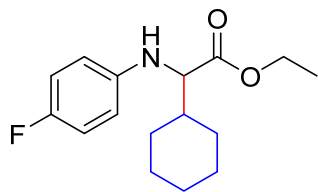

**Ethyl 2-cyclohexyl-2-((4-fluorophenyl)amino)acetate (3qa).** The desired pure product was obtained in 45% yield (22.7 mg) as a yellow oil.  $^1\text{H}$  NMR (400 MHz,  $\text{CDCl}_3$ )  $\delta$  6.99 – 6.73 (m, 2H), 6.60 – 6.39 (m, 2H), 4.15 (q,  $J = 7.1$  Hz, 2H), 3.99 (s, 1H), 3.76 (d,  $J = 6.1$  Hz, 1H), 2.07 – 1.50 (m, 7H), 1.30 – 1.26 (m, 1H), 1.23 (t,  $J = 7.1$  Hz, 3H), 1.19 – 1.07 (m, 3H).  $^{13}\text{C}$  NMR (150 MHz,  $\text{CDCl}_3$ )  $\delta$  173.5, 156.3 (d,  $J = 235.8$  Hz), 143.9, 115.6 (d,  $J = 22.4$  Hz), 114.7 (d,  $J = 7.5$  Hz), 63.1, 60.7, 41.3, 29.6, 29.2, 26.2, 26.1, 26.0, 14.2. HRMS (ESI) exact mass calcd for  $\text{C}_{16}\text{H}_{23}\text{FNO}_2$  [M+H]  $m/z$  280.1707, found 280.1711.

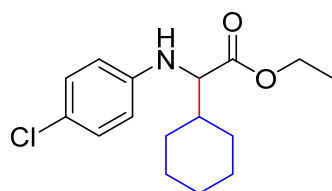

**Ethyl 2-((4-chlorophenyl)amino)-2-cyclohexylacetate (3ra).** The desired pure product was obtained in 43% yield (25.1 mg) as a yellow oil.  $^1\text{H}$  NMR (600 MHz,  $\text{CDCl}_3$ )  $\delta$  7.09 (d,  $J = 8.9$  Hz, 2H), 6.53 (d,  $J = 8.9$  Hz, 2H), 4.16 (q,  $J = 7.1$  Hz, 2H), 4.11 (s, 1H), 3.79 (d, 1H), 1.85 – 1.65 (m, 6H), 1.31 – 1.26 (m, 1H), 1.24 (t,  $J = 7.1$  Hz, 3H), 1.22 – 1.09 (m, 4H).  $^{13}\text{C}$  NMR (150 MHz,  $\text{CDCl}_3$ )  $\delta$  173.3, 146.0, 129.1, 122.7, 114.6, 62.2, 60.9, 41.2, 29.6, 29.1, 26.1, 26.0, 25.9, 14.3. HRMS (ESI) exact mass calcd for  $\text{C}_{16}\text{H}_{23}\text{ClNO}_2$  [M+H]  $m/z$  296.1412, found 296.1411.

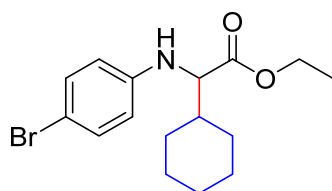

**Ethyl 2-((4-bromophenyl)amino)-2-cyclohexylacetate (3sa).** The desired pure product was obtained in 42% yield (28.2 mg) as a yellow oil.  $^1\text{H}$  NMR (400 MHz,  $\text{CDCl}_3$ )  $\delta$  7.23 (d,  $J = 8.9$  Hz, 1H), 7.09 (d,  $J = 8.9$  Hz, 1H), 6.52 (dd,  $J = 17.8, 8.9$  Hz, 2H), 4.16 (q,  $J = 7.1$  Hz, 2H), 3.79 (d,  $J = 6.1$  Hz, 1H), 1.87 – 1.62 (m, 6H), 1.34 – 1.27 (m, 1H), 1.24 (t,  $J = 7.1$  Hz, 3H), 1.21 – 1.09 (m, 4H).  $^{13}\text{C}$  NMR (150 MHz,

CDCl<sub>3</sub>)  $\delta$  173.3, 146.5, 131.9, 115.1, 109.7, 62.0, 60.9, 41.2, 29.6, 29.1, 26.1, 26.0, 25.9, 14.3. HRMS (ESI) exact mass calcd for C<sub>16</sub>H<sub>23</sub>BrNO<sub>2</sub> [M+H] m/z 340.0907, found 340.0909.

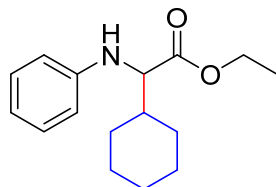

**Ethyl 2-cyclohexyl-2-(phenylamino)acetate (3ta).** The desired pure product was obtained in 34% yield (17.8 mg) as a yellow oil. <sup>1</sup>H NMR (400 MHz, CDCl<sub>3</sub>)  $\delta$  7.16 (dd,  $J$  = 8.5, 7.4 Hz, 2H), 6.75 – 6.69 (m, 1H), 6.63 (dd,  $J$  = 8.6, 0.9 Hz, 2H), 4.17 (q,  $J$  = 7.1 Hz, 2H), 4.12 (s, 1H), 3.87 (d,  $J$  = 6.3 Hz, 1H), 1.89 – 1.60 (m, 7H), 1.34 – 1.27 (m, 1H), 1.25 (t,  $J$  = 7.1 Hz, 3H), 1.22 – 1.09 (m, 3H). <sup>13</sup>C NMR (150 MHz, CDCl<sub>3</sub>)  $\delta$  173.7, 147.4, 129.2, 118.0, 113.5, 62.0, 60.8, 41.3, 29.6, 29.2, 26.2, 26.1, 26.0, 14.3. HRMS (ESI) exact mass calcd for C<sub>16</sub>H<sub>24</sub>NO<sub>2</sub> [M+H] m/z 262.1802, found 262.1801.

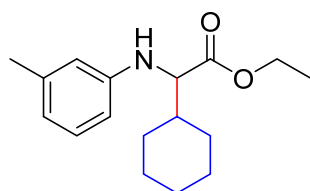

**Ethyl 2-cyclohexyl-2-(m-tolylamino)acetate (3ua).** The desired pure product was obtained in 34% yield (23.5 mg) as a red oil. <sup>1</sup>H NMR (400 MHz, CDCl<sub>3</sub>)  $\delta$  7.05 (t,  $J$  = 7.7 Hz, 1H), 6.54 (d,  $J$  = 7.3 Hz, 1H), 6.44 (d,  $J$  = 13.3 Hz, 2H), 4.23 – 4.13 (m, 2H), 4.08 (s, 1H), 3.85 (s, 1H), 2.26 (s, 3H), 1.89 – 1.61 (m, 7H), 1.25 (t,  $J$  = 7.1 Hz, 3H), 1.22 – 1.07 (m, 4H). <sup>13</sup>C NMR (150 MHz, CDCl<sub>3</sub>)  $\delta$  173.7, 147.5, 139.0, 129.1, 119.0, 114.4, 110.5, 62.0, 60.7, 41.3, 29.6, 29.2, 26.2, 26.1, 26.0, 21.6, 14.3. HRMS (ESI) exact mass calcd for C<sub>17</sub>H<sub>26</sub>NO<sub>2</sub> [M+H] m/z 276.1958, found 276.1960.

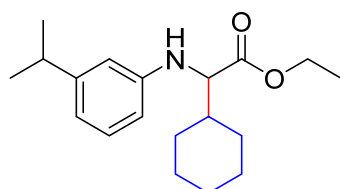

**Ethyl 2-cyclohexyl-2-((3-isopropylphenyl)amino)acetate (3va).** The desired pure product was obtained in 34% yield (31.3 mg) as a red oily liquid. <sup>1</sup>H NMR (400 MHz, CDCl<sub>3</sub>)  $\delta$  7.09 (t,  $J$  = 7.8 Hz, 1H), 6.61 (d,  $J$  = 8.1 Hz, 1H), 6.51 (s, 1H), 6.45 (dd,  $J$  = 8.0, 2.4 Hz, 1H), 4.17 (q,  $J$  = 7.1 Hz, 2H), 4.12 (d,  $J$  =

8.7 Hz, 1H), 3.88 (d,  $J = 6.3$  Hz, 1H), 2.87 – 2.73 (m, 1H), 1.93 – 1.65 (m, 7H), 1.36 – 1.27 (m, 2H), 1.25 (t,  $J = 7.2$  Hz, 3H), 1.22 (d,  $J = 6.9$  Hz, 6H), 1.16 (dd,  $J = 19.9, 7.7$  Hz, 2H).  $^{13}\text{C}$  NMR (151 MHz,  $\text{CDCl}_3$ )  $\delta$  173.8, 150.1, 147.5, 129.1, 116.4, 111.9, 110.8, 62.1, 60.7, 41.4, 34.2, 29.6, 29.2, 26.2, 26.1, 26.0, 23.9, 23.8, 14.3. HRMS (ESI) exact mass calcd for  $\text{C}_{19}\text{H}_{30}\text{NO}_2$  [M+H]  $m/z$  304.2271, found 304.2275.

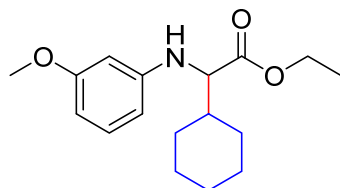

**Ethyl 2-cyclohexyl-2-((3-methoxyphenyl)amino)acetate (3wa).** The desired pure product was obtained in 59% yield (34.5 mg) as a yellow oil.  $^1\text{H}$  NMR (400 MHz,  $\text{CDCl}_3$ )  $\delta$  7.06 (t,  $J = 8.1$  Hz, 1H), 6.30 – 6.21 (m, 2H), 6.17 (t,  $J = 2.3$  Hz, 1H), 4.18 (q,  $J = 9.0, 5.3$  Hz, 2H), 4.14 (s, 1H), 3.87 – 3.81 (m, 1H), 3.75 (s, 3H), 1.86 – 1.63 (m, 6H), 1.38 – 1.28 (m, 1H), 1.25 (t,  $J = 7.1$  Hz, 3H), 1.23 – 1.09 (m, 4H).  $^{13}\text{C}$  NMR (150 MHz,  $\text{CDCl}_3$ )  $\delta$  173.6, 160.8, 148.8, 130.0, 106.4, 103.3, 99.4, 61.9, 60.8, 55.0, 41.3, 29.6, 29.2, 26.2, 26.1, 26.0, 14.3. HRMS (ESI) exact mass calcd for  $\text{C}_{17}\text{H}_{26}\text{NO}_3$  [M+H]  $m/z$  292.1907, found 292.1906.

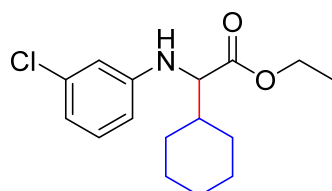

**Ethyl 2-((3-chlorophenyl)amino)-2-cyclohexylacetate (3xa).** The desired pure product was obtained in 47% yield (27.7 mg) as a yellow oil.  $^1\text{H}$  NMR (400 MHz,  $\text{CDCl}_3$ )  $\delta$  7.09 – 7.00 (m, 1H), 6.70 – 6.65 (m, 1H), 6.60 (d,  $J = 1.8$  Hz, 1H), 6.48 (dd,  $J = 8.1, 2.0$  Hz, 1H), 4.25 – 4.14 (m, 2H), 4.17 (s, 1H), 3.82 (dd,  $J = 9.2, 6.0$  Hz, 1H), 1.85 – 1.58 (m, 7H), 1.26 (t,  $J = 7.1$  Hz, 3H), 1.22 – 1.09 (m, 4H).  $^{13}\text{C}$  NMR (150 MHz,  $\text{CDCl}_3$ )  $\delta$  173.2, 148.6, 135.0, 130.2, 117.9, 113.2, 111.7, 61.7, 61.0, 41.2, 29.6, 29.1, 26.1, 26.0, 25.9, 14.3. HRMS (ESI) exact mass calcd for  $\text{C}_{16}\text{H}_{23}\text{ClNO}_2$  [M+H]  $m/z$  296.1412, found 296.1414.



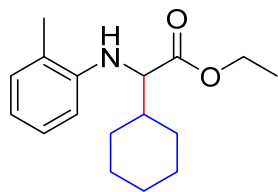

**Ethyl 2-cyclohexyl-2-(o-tolylamino)acetate (3ya).** The desired pure product was obtained in 68% yield (37.3 mg) as a yellow oil.  $^1\text{H}$  NMR (400 MHz,  $\text{CDCl}_3$ )  $\delta$  7.07 (dd,  $J = 12.7, 7.0$  Hz, 2H), 6.66 (t,  $J = 7.4$  Hz, 1H), 6.56 (d,  $J = 8.0$  Hz, 1H), 4.17 (q,  $J = 7.2$  Hz, 2H), 4.05 (d,  $J = 9.0$  Hz, 1H), 3.92 (d,  $J = 6.1$  Hz, 1H), 2.21 (s, 3H), 1.94 – 1.65 (m, 6H), 1.37 – 1.28 (m, 2H), 1.26 (t,  $J = 7.1$  Hz, 3H), 1.21 – 1.10 (m, 3H).  $^{13}\text{C}$  NMR (150 MHz,  $\text{CDCl}_3$ )  $\delta$  173.8, 145.4, 130.3, 127.0, 122.7, 117.6, 110.4, 61.9, 60.8, 41.4, 29.6, 29.3, 26.2, 26.1, 26.0, 17.5, 14.3. HRMS (ESI) exact mass calcd for  $\text{C}_{17}\text{H}_{26}\text{NO}_2$   $[\text{M}+\text{H}]$   $m/z$  276.1958, found 276.1954.

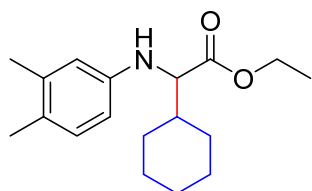

**Ethyl 2-cyclohexyl-2-((3,4-dimethylphenyl)amino)acetate (3za).** The desired pure product was obtained in 34% yield (18.9 mg) as a red oil.  $^1\text{H}$  NMR (400 MHz,  $\text{CDCl}_3$ )  $\delta$  6.92 (d,  $J = 8.1$  Hz, 1H), 6.47 (d,  $J = 2.4$  Hz, 1H), 6.39 (dd,  $J = 8.1, 2.5$  Hz, 1H), 4.20 – 4.13 (m, 2H), 3.82 (d,  $J = 6.1$  Hz, 1H), 2.18 (s, 3H), 2.14 (s, 3H), 1.91 – 1.63 (m, 6H), 1.32 – 1.27 (m, 1H), 1.25 (t,  $J = 7.1$  Hz, 3H), 1.22 – 1.09 (m, 4H).  $^{13}\text{C}$  NMR (150 MHz,  $\text{CDCl}_3$ )  $\delta$  173.9, 145.6, 137.3, 130.3, 126.1, 115.5, 110.9, 62.3, 60.7, 41.3, 29.6, 29.2, 26.2, 26.1, 26.0, 20.0, 18.7, 14.3. HRMS (ESI) exact mass calcd for  $\text{C}_{18}\text{H}_{28}\text{NO}_2$   $[\text{M}+\text{H}]$   $m/z$  290.2115, found 290.2111.

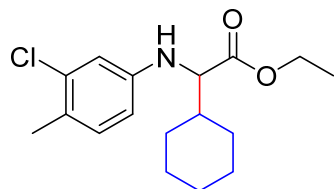

**Ethyl 2-((3-chloro-4-methylphenyl)amino)-2-cyclohexylacetate (3aaa).** The desired pure product was obtained in 48% yield (30.2 mg) as a red oil.  $^1\text{H}$  NMR (400 MHz,  $\text{CDCl}_3$ )  $\delta$  6.97 (d,  $J = 8.2$  Hz, 1H), 6.63 (d,  $J = 2.4$  Hz, 1H), 6.44 (dd,  $J = 8.2, 2.4$  Hz, 1H), 4.21 – 4.13 (m, 2H), 4.07 (d,  $J = 9.5$  Hz, 1H), 3.79 (dd,  $J = 9.5, 6.1$  Hz, 1H), 2.23 (s, 3H), 1.87 – 1.62 (m, 7H), 1.25 (t,  $J = 7.1$  Hz, 3H), 1.22 – 1.07

(m, 4H).  $^{13}\text{C}$  NMR (150 MHz,  $\text{CDCl}_3$ )  $\delta$  173.4, 146.6, 134.8, 131.3, 125.0, 113.9, 112.3, 62.1, 60.9, 41.2, 29.6, 29.1, 26.1, 26.0, 25.9, 18.8, 14.3. HRMS (ESI) exact mass calcd for  $\text{C}_{17}\text{H}_{25}\text{ClNO}_2$   $[\text{M}+\text{H}]$   $m/z$  310.1568, found 310.1575.

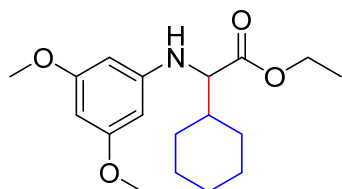

**Ethyl 2-cyclohexyl-2-((3,5-dimethoxyphenyl)amino)acetate (3aba).** The desired pure product was obtained in 23% yield (14.5 mg) as a red oil.  $^1\text{H}$  NMR (400 MHz,  $\text{CDCl}_3$ )  $\delta$  5.88 (d,  $J$  = 1.9 Hz, 1H), 5.81 (d,  $J$  = 1.8 Hz, 2H), 4.20 – 4.16 (m, 2H), 4.15 (s, 1H), 3.85 – 3.79 (m, 1H), 3.74 (s, 3H), 3.73 (s, 3H), 1.86 – 1.62 (m, 6H), 1.34 – 1.29 (m, 1H), 1.26 (t,  $J$  = 5.4 Hz, 3H), 1.20 – 1.09 (m, 4H).  $^{13}\text{C}$  NMR (150 MHz,  $\text{CDCl}_3$ )  $\delta$  173.5, 161.7, 149.3, 92.2, 90.5, 61.8, 60.8, 55.1, 41.3, 29.6, 29.1, 26.2, 26.1, 26.0, 14.3. HRMS (ESI) exact mass calcd for  $\text{C}_{18}\text{H}_{28}\text{NO}_4$   $[\text{M}+\text{H}]$   $m/z$  322.2013, found 322.2011.

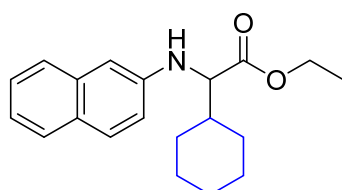

**Ethyl 2-cyclohexyl-2-(naphthalen-2-ylamino)acetate (3aca).** The desired pure product was obtained in 33% yield (20.5 mg) as a colourless oil.  $^1\text{H}$  NMR (400 MHz,  $\text{CDCl}_3$ )  $\delta$  7.69 – 7.58 (m, 1H), 7.38 – 7.32 (m, 1H), 7.23 – 7.18 (m, 1H), 6.93 (dd,  $J$  = 8.8, 2.4 Hz, 1H), 6.82 (d,  $J$  = 2.3 Hz, 1H), 4.33 (s, 1H), 4.24 – 4.14 (m, 2H), 4.02 (d,  $J$  = 6.0 Hz, 1H), 1.96 – 1.65 (m, 6H), 1.38 – 1.28 (m, 2H), 1.26 (t,  $J$  = 7.1 Hz, 3H), 1.23 – 1.14 (m, 3H).  $^{13}\text{C}$  NMR (150 MHz,  $\text{CDCl}_3$ )  $\delta$  173.6, 145.1, 135.0, 129.0, 127.8, 127.6, 126.3, 126.0, 122.2, 118.2, 105.4, 62.0, 60.9, 41.3, 29.7, 29.3, 26.2, 26.1, 26.0, 14.3. HRMS (ESI) exact mass calcd for  $\text{C}_{20}\text{H}_{26}\text{NO}_4$   $[\text{M}+\text{H}]$   $m/z$  312.1958, found 312.1963.

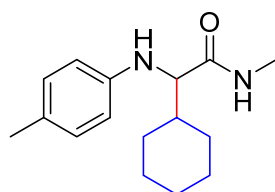

**2-cyclohexyl-N-methyl-2-(p-tolylamino)acetamide (3ada).** The desired pure product was obtained in 83% yield (42.7 mg) as a red oil.  $^1\text{H}$  NMR (400 MHz,  $\text{CDCl}_3$ )  $\delta$  7.00 (d,  $J = 8.3$  Hz, 2H), 6.87 (s, 1H), 6.52 (d,  $J = 8.0$  Hz, 2H), 3.86 (s, 1H), 3.53 (d,  $J = 4.0$  Hz, 1H), 2.78 (d,  $J = 4.8$  Hz, 3H), 2.24 (s, 3H), 2.08 – 1.98 (m, 1H), 1.77 (d,  $J = 11.5$  Hz, 2H), 1.68 (d,  $J = 11.9$  Hz, 3H), 1.35 – 1.05 (m, 5H).  $^{13}\text{C}$  NMR (150 MHz,  $\text{CDCl}_3$ )  $\delta$  173.6, 145.1, 129.8, 128.2, 113.6, 65.1, 41.1, 30.3, 28.1, 26.3, 26.2, 26.1, 25.9, 20.3. HRMS (ESI) exact mass calcd for  $\text{C}_{16}\text{H}_{25}\text{N}_2\text{O}$   $[\text{M}+\text{H}]$   $m/z$  261.1961, found 261.1966.

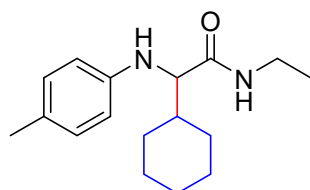

**2-cyclohexyl-N-ethyl-2-(p-tolylamino)acetamide (3aea).** The desired pure product was obtained in 91% yield (49.9 mg) as a red oil.  $^1\text{H}$  NMR (400 MHz,  $\text{CDCl}_3$ )  $\delta$  7.00 (d,  $J = 8.4$  Hz, 2H), 6.83 (s, 1H), 6.52 (d,  $J = 8.3$  Hz, 2H), 3.77 (s, 1H), 3.49 (d,  $J = 3.0$  Hz, 1H), 3.39 – 3.13 (m, 2H), 2.24 (s, 3H), 2.08 – 1.97 (m, 1H), 1.88 – 1.61 (m, 6H), 1.33 – 1.14 (m, 4H), 1.07 (t,  $J = 7.3$  Hz, 3H).  $^{13}\text{C}$  NMR (150 MHz,  $\text{CDCl}_3$ )  $\delta$  172.6, 145.2, 129.8, 128.2, 113.7, 65.2, 41.0, 33.9, 30.3, 28.0, 26.3, 26.2, 26.1, 20.3, 14.9. HRMS (ESI) exact mass calcd for  $\text{C}_{17}\text{H}_{27}\text{N}_2\text{O}$   $[\text{M}+\text{H}]$   $m/z$  275.2118, found 275.2122.

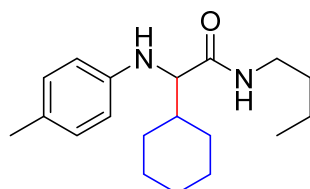

**N-butyl-2-cyclohexyl-2-(p-tolylamino)acetamide (3afa).** The desired pure product was obtained in 74% yield (44.8 mg) as a red oil.  $^1\text{H}$  NMR (400 MHz,  $\text{CDCl}_3$ )  $\delta$  7.00 (d,  $J = 8.4$  Hz, 2H), 6.83 (s, 1H), 6.52 (d,  $J = 8.4$  Hz, 2H), 3.77 (s, 1H), 3.50 (d,  $J = 3.9$  Hz, 1H), 3.34 – 3.13 (m, 2H), 2.24 (s, 3H), 2.10 – 1.93 (m, 1H), 1.82 – 1.64 (m, 6H), 1.46 – 1.34 (m, 2H), 1.33 – 1.20 (m, 4H), 1.20 – 1.10 (m, 2H), 0.86 (t,  $J = 7.3$  Hz, 3H).  $^{13}\text{C}$  NMR (150 MHz,  $\text{CDCl}_3$ )  $\delta$  172.6, 145.2, 129.8, 128.2, 113.7, 65.3, 41.0, 38.8, 31.7, 30.4, 28.0, 26.3, 26.2, 26.1, 20.3, 20.0, 13.6. HRMS (ESI) exact mass calcd for  $\text{C}_{19}\text{H}_{31}\text{N}_2\text{O}$   $[\text{M}+\text{H}]$   $m/z$  303.2431, found 303.2438.

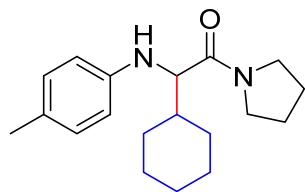

**2-cyclohexyl-1-(pyrrolidin-1-yl)-2-(p-tolylamino)ethan-1-one (3aga).** The desired pure product was obtained in 75% yield (44.7 mg) as a red oil.  $^1\text{H}$  NMR (400 MHz,  $\text{CDCl}_3$ )  $\delta$  6.94 (d,  $J = 8.0$  Hz, 2H), 6.55 (d,  $J = 8.4$  Hz, 2H), 4.32 (s, 1H), 3.90 (d,  $J = 5.8$  Hz, 1H), 3.55 – 3.38 (m, 4H), 2.21 (s, 3H), 2.00 – 1.78 (m, 5H), 1.80 – 1.61 (m, 6H), 1.32 – 1.03 (m, 4H).  $^{13}\text{C}$  NMR (150 MHz,  $\text{CDCl}_3$ )  $\delta$  171.9, 146.1, 129.7, 126.8, 113.9, 61.2, 46.6, 45.7, 42.0, 30.2, 29.0, 26.3, 26.28, 26.2, 26.1, 24.1, 20.3. HRMS (ESI) exact mass calcd for  $\text{C}_{19}\text{H}_{29}\text{N}_2\text{O}$   $[\text{M}+\text{H}]$   $m/z$  301.2274, found 301.2278.

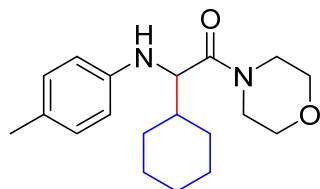

**2-cyclohexyl-1-morpholino-2-(p-tolylamino)ethan-1-one (3aha).** The desired pure product was obtained in 78% yield (50.7 mg) as a red oil.  $^1\text{H}$  NMR (400 MHz,  $\text{CDCl}_3$ )  $\delta$  6.95 (d,  $J = 8.2$  Hz, 2H), 6.54 (d,  $J = 7.9$  Hz, 2H), 4.31 (s, 1H), 4.04 (d,  $J = 5.8$  Hz, 1H), 3.66 – 3.53 (m, 8H), 2.21 (s, 3H), 1.88 (d,  $J = 11.6$  Hz, 1H), 1.82 – 1.54 (m, 6H), 1.27 – 1.12 (m, 4H).  $^{13}\text{C}$  NMR (150 MHz,  $\text{CDCl}_3$ )  $\delta$  172.0, 145.8, 129.8, 127.4, 114.3, 67.0, 66.6, 59.0, 46.3, 42.4, 41.9, 30.3, 28.8, 26.2, 26.18, 26.1, 20.4. HRMS (ESI) exact mass calcd for  $\text{C}_{19}\text{H}_{29}\text{N}_2\text{O}_2$   $[\text{M}+\text{H}]$   $m/z$  317.2224, found 317.2220.

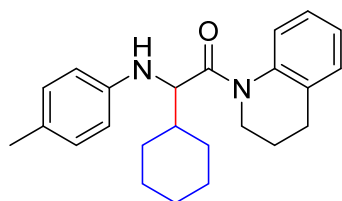

**2-cyclohexyl-1-(3,4-dihydroquinolin-1(2H)-yl)-2-(p-tolylamino)ethan-1-one (3aia).** The desired pure product was obtained in 76% yield (53.9 mg) as a red oil.  $^1\text{H}$  NMR (600 MHz,  $\text{CDCl}_3$ )  $\delta$  7.18 (s, 3H), 7.03 (s, 1H), 6.93 (dd,  $J = 35.5, 6.7$  Hz, 2H), 6.37 (s, 2H), 4.44 (s, 1H), 4.19 (s, 1H), 3.96 (d,  $J = 4.5$  Hz, 1H), 3.58 (s, 1H), 2.54 (s, 2H), 2.22 (s, 3H), 2.01 (d,  $J = 5.8$  Hz, 1H), 1.87 – 1.50 (m, 5H), 1.31 – 0.85 (m, 6H).  $^{13}\text{C}$  NMR (150 MHz,  $\text{CDCl}_3$ )  $\delta$  173.8, 145.2, 138.9, 134.7, 129.6, 128.4, 126.4, 125.9, 124.7,

115.2, 114.0, 59.1, 42.6, 29.9, 29.1, 26.5, 26.3, 26.2, 24.1, 20.4. HRMS (ESI) exact mass calcd for  $C_{24}H_{31}N_2O$  [M+H] m/z 363.2431, found 363.2437.

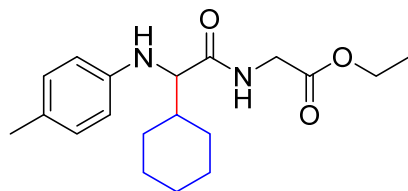

**Ethyl (2-cyclohexyl-2-(p-tolylamino)acetyl)glycinate (3aja).** The desired pure product was obtained in 82% yield (54.7 mg) as a red oil.  $^1H$  NMR (400 MHz,  $CDCl_3$ )  $\delta$  7.29 (t,  $J = 5.5$  Hz, 1H), 7.00 (d,  $J = 8.5$  Hz, 2H), 6.54 (d,  $J = 8.4$  Hz, 2H), 4.21 – 4.12 (m, 3H), 3.86 (dd,  $J = 18.2, 4.9$  Hz, 1H), 3.57 (d,  $J = 4.2$  Hz, 1H), 2.23 (s, 3H), 2.09 – 1.98 (m, 1H), 1.84 – 1.65 (m, 6H), 1.37 – 1.26 (m, 2H), 1.24 (t,  $J = 7.1$  Hz, 3H), 1.20 – 1.09 (m, 2H).  $^{13}C$  NMR (150 MHz,  $CDCl_3$ )  $\delta$  173.4, 169.6, 145.1, 129.8, 128.3, 113.8, 65.1, 61.3, 41.2, 41.0, 30.2, 28.0, 26.3, 26.2, 26.1, 20.3, 14.1. HRMS (ESI) exact mass calcd for  $C_{19}H_{29}N_2O_3$  [M+H] m/z 333.2173, found 333.2179.

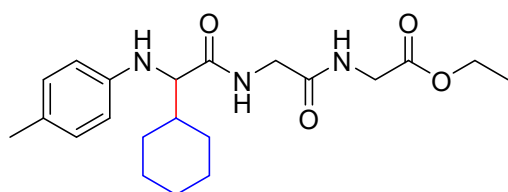

**2-cyclohexyl-N-(2-((3-methoxy-2-oxopropyl)amino)-2-oxoethyl)-2-(p-tolylamino)acetamide (3aka)**  
The desired pure product was obtained in 62% yield (48.8 mg) as a yellow oil.  $^1H$  NMR (400 MHz,  $CDCl_3$ )  $\delta$  7.48 (s, 1H), 6.98 (d,  $J = 8.2$  Hz, 2H), 6.60 (s, 1H), 6.54 (d,  $J = 8.2$  Hz, 2H), 4.17 (q,  $J = 7.1$  Hz, 2H), 3.96 (d,  $J = 5.3$  Hz, 2H), 3.93 – 3.87 (m, 2H), 3.62 (d,  $J = 4.5$  Hz, 1H), 2.22 (s, 3H), 2.07 – 1.88 (m, 1H), 1.83 – 1.58 (m, 5H), 1.43 – 1.30 (m, 1H), 1.26 (t,  $J = 7.1$  Hz, 3H), 1.24 – 1.11 (m, 4H).  $^{13}C$  NMR (151 MHz,  $CDCl_3$ )  $\delta$  173.9, 169.4, 169.0, 144.9, 129.9, 128.3, 113.6, 64.8, 61.5, 42.8, 41.2, 41.1, 30.2, 28.4, 26.2, 26.1, 26.0, 20.3, 14.1. HRMS (ESI) exact mass calcd for  $C_{21}H_{32}N_3O_4$  [M+H] m/z 390.2387, found 390.2395.

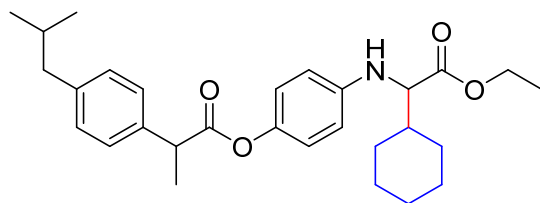

4-((1-cyclohexyl-2-ethoxy-2-oxoethyl)amino)phenyl 2-(4-isobutylphenyl)propanoate (**3ala**) The desired pure product was obtained in 63% yield (58.9 mg) as a yellow oil.  $^1\text{H}$  NMR (400 MHz,  $\text{CDCl}_3$ )  $\delta$  7.28 (d,  $J = 8.0$  Hz, 2H), 7.13 (d,  $J = 8.0$  Hz, 2H), 6.79 (d,  $J = 8.8$  Hz, 2H), 6.55 (d,  $J = 8.8$  Hz, 2H), 4.15 (q,  $J = 14.2, 7.1$  Hz, 2H), 3.89 (q,  $J = 14.2, 7.1$  Hz, 1H), 3.78 (s, 1H), 2.46 (d,  $J = 7.1$  Hz, 2H), 1.89 – 1.62 (m, 7H), 1.57 (d,  $J = 7.1$  Hz, 3H), 1.47 – 1.28 (m, 1H), 1.23 (t,  $J = 7.1$  Hz, 3H), 1.20 – 1.02 (m, 3H), 0.91 (d,  $J = 6.6$  Hz, 6H).  $^{13}\text{C}$  NMR (151 MHz,  $\text{CDCl}_3$ )  $\delta$  173.7, 173.5, 145.2, 142.7, 140.6, 137.5, 129.4, 127.2, 121.9, 113.9, 62.4, 60.8, 45.2, 45.0, 41.2, 30.2, 29.6, 29.2, 26.2, 26.1, 26.0, 22.4, 18.6, 14.3. HRMS (ESI) exact mass calcd for  $\text{C}_{29}\text{H}_{40}\text{NO}_4$   $[\text{M}+\text{H}]$   $m/z$  466.2952, found 466.2956.

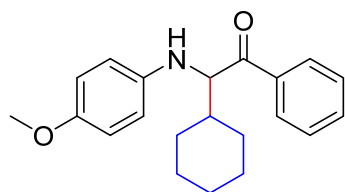

2-cyclohexyl-2-((4-methoxyphenyl)amino)-1-phenylethan-1-one (**3ama**) The desired pure product was obtained in 60% yield (38.6 mg) as a yellow oil.  $^1\text{H}$  NMR (400 MHz,  $\text{CDCl}_3$ )  $\delta$  7.95 (d,  $J = 7.4$  Hz, 2H), 7.59 (t,  $J = 7.4$  Hz, 1H), 7.49 (t,  $J = 7.7$  Hz, 2H), 6.74 (d,  $J = 9.0$  Hz, 2H), 6.68 (d,  $J = 8.9$  Hz, 2H), 4.77 (d,  $J = 4.2$  Hz, 1H), 4.39 (s, 1H), 3.71 (s, 3H), 1.88 – 1.67 (m, 4H), 1.60 (s, 2H), 1.46 – 1.34 (m, 1H), 1.30 – 1.19 (m, 1H), 1.17 – 1.04 (m, 3H).  $^{13}\text{C}$  NMR (151 MHz,  $\text{CDCl}_3$ )  $\delta$  201.8, 152.5, 142.5, 136.2, 133.4, 128.8, 128.3, 115.7, 114.9, 64.7, 55.7, 41.8, 30.9, 27.7, 26.4, 26.2, 26.0. HRMS (ESI) exact mass calcd for  $\text{C}_{21}\text{H}_{26}\text{NO}_2$   $[\text{M}+\text{H}]$   $m/z$  324.1958, found 324.1962.

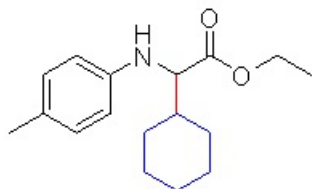

**3aa**

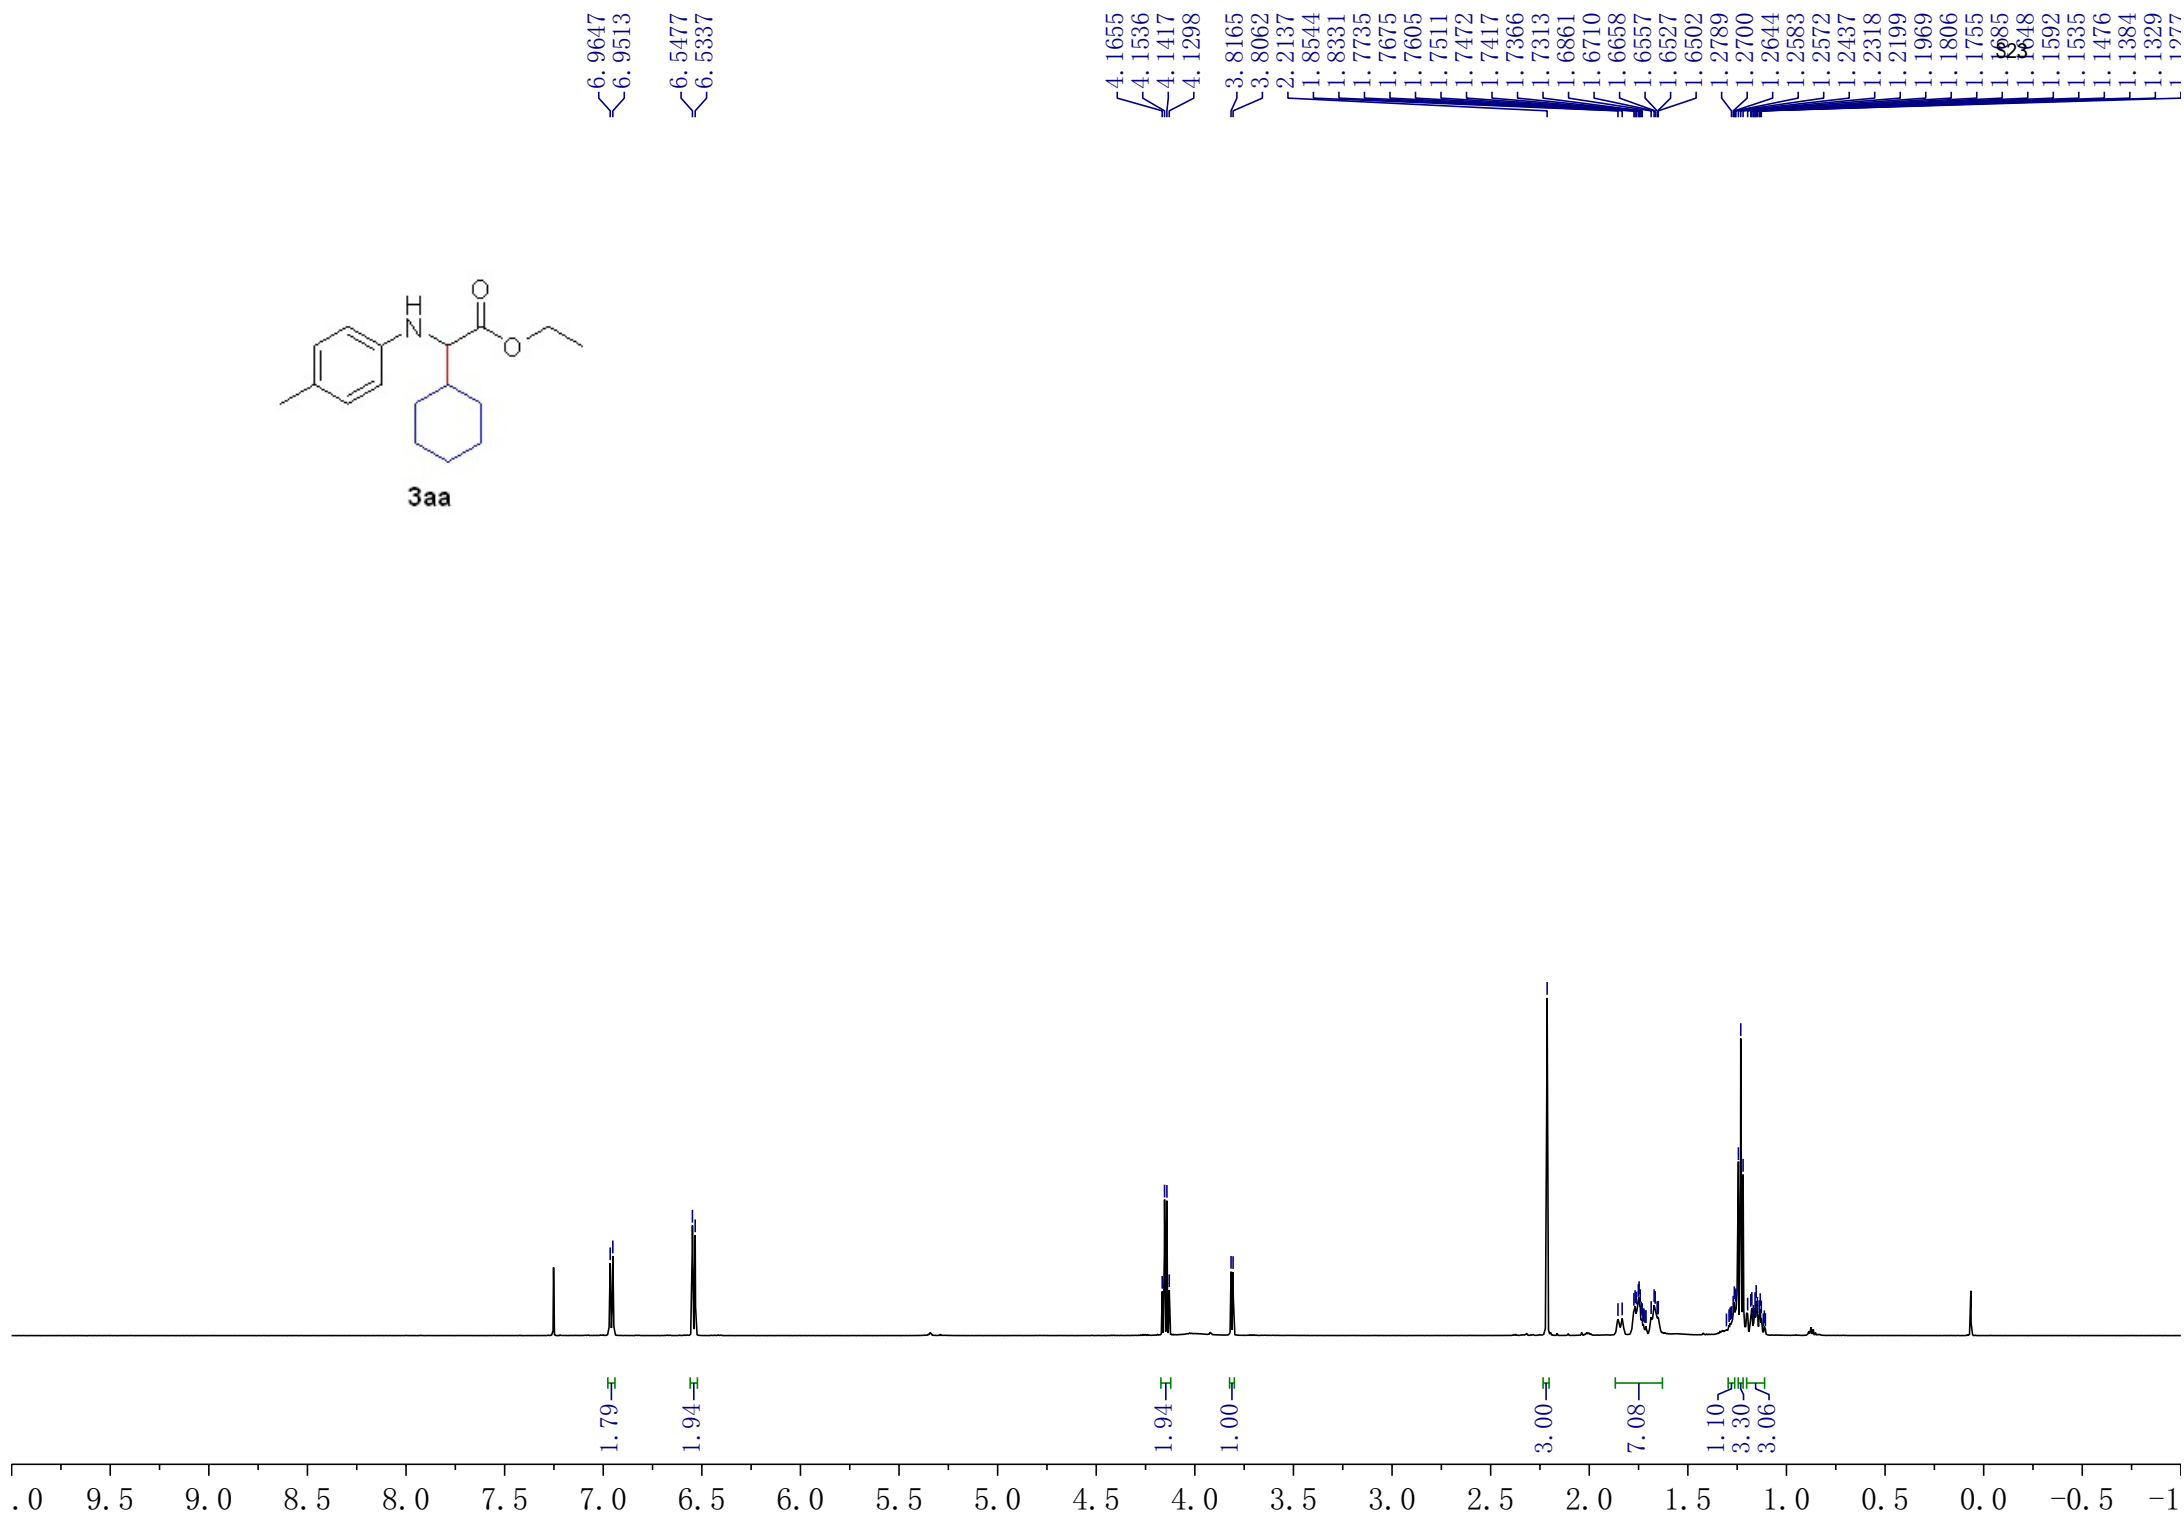

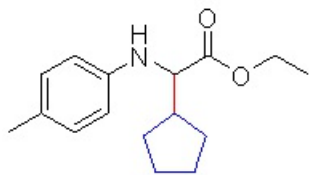

3ab

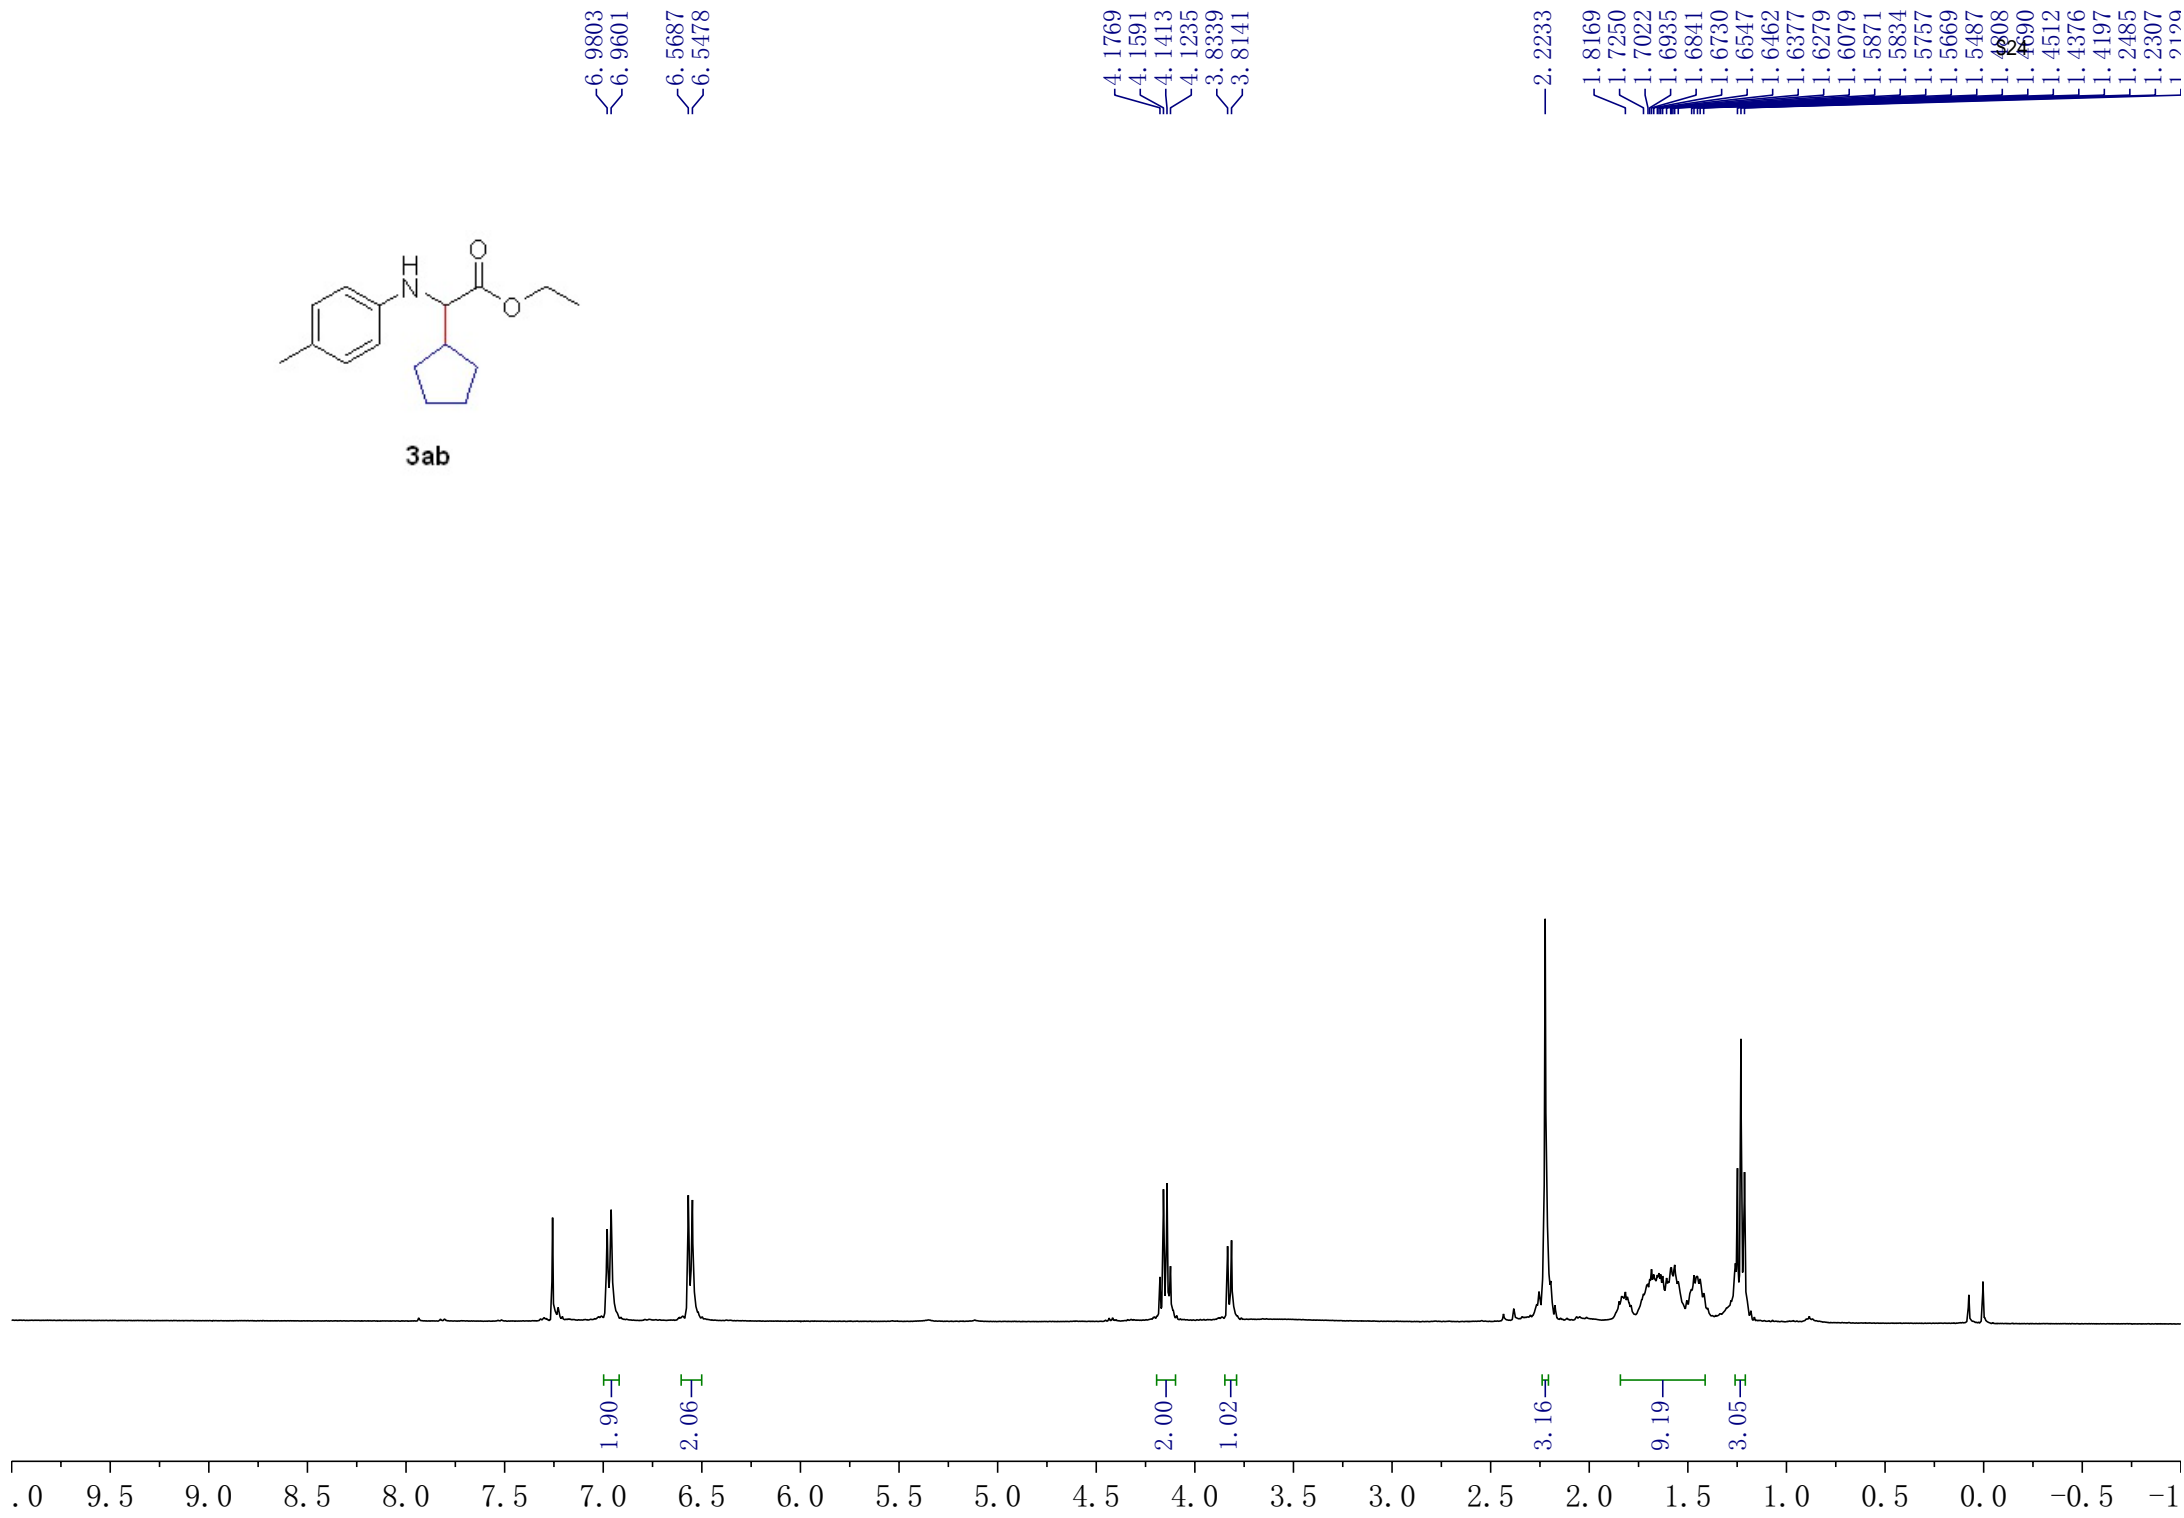



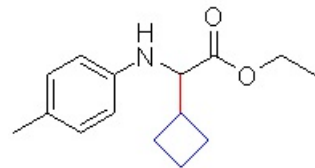

3ac

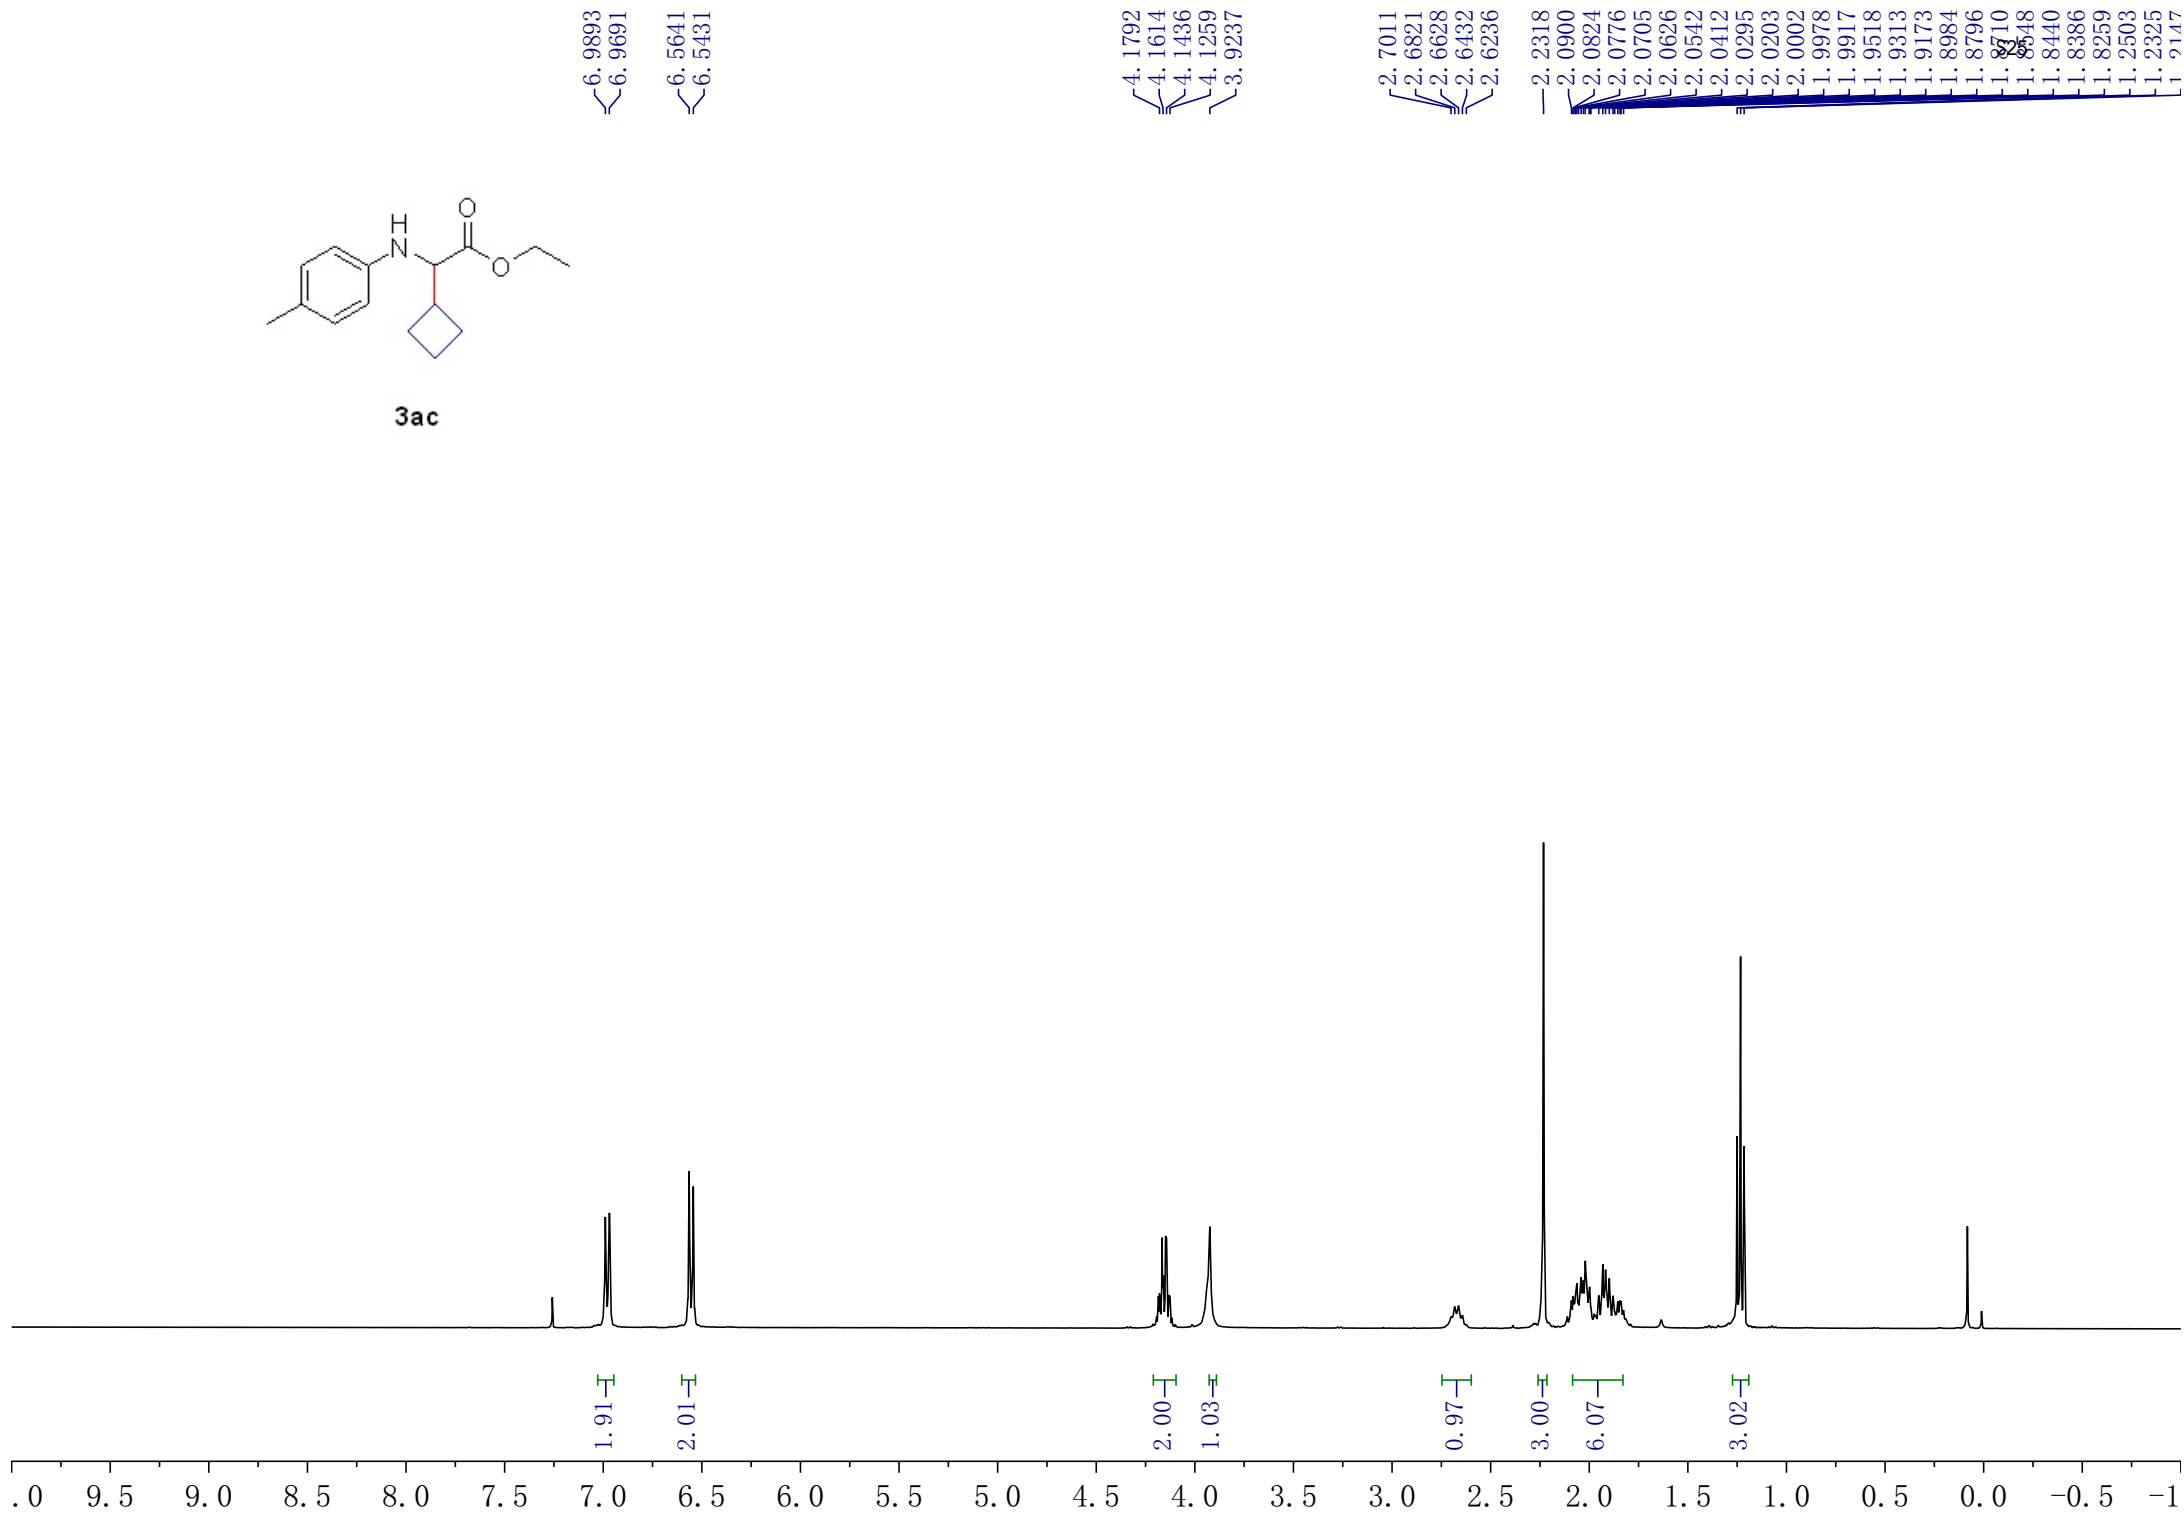

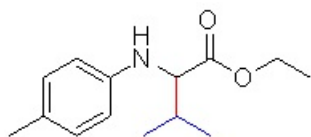

3ad

6.9923  
6.9723

6.5802  
6.5594

4.1976  
4.1798  
4.1618  
4.1440  
3.8242  
3.8096

2.2328  
2.1481  
2.1316  
2.1155  
2.0989  
2.0821

1.2666  
1.2487  
1.2309  
1.0565  
1.0393  
1.0315  
1.0144

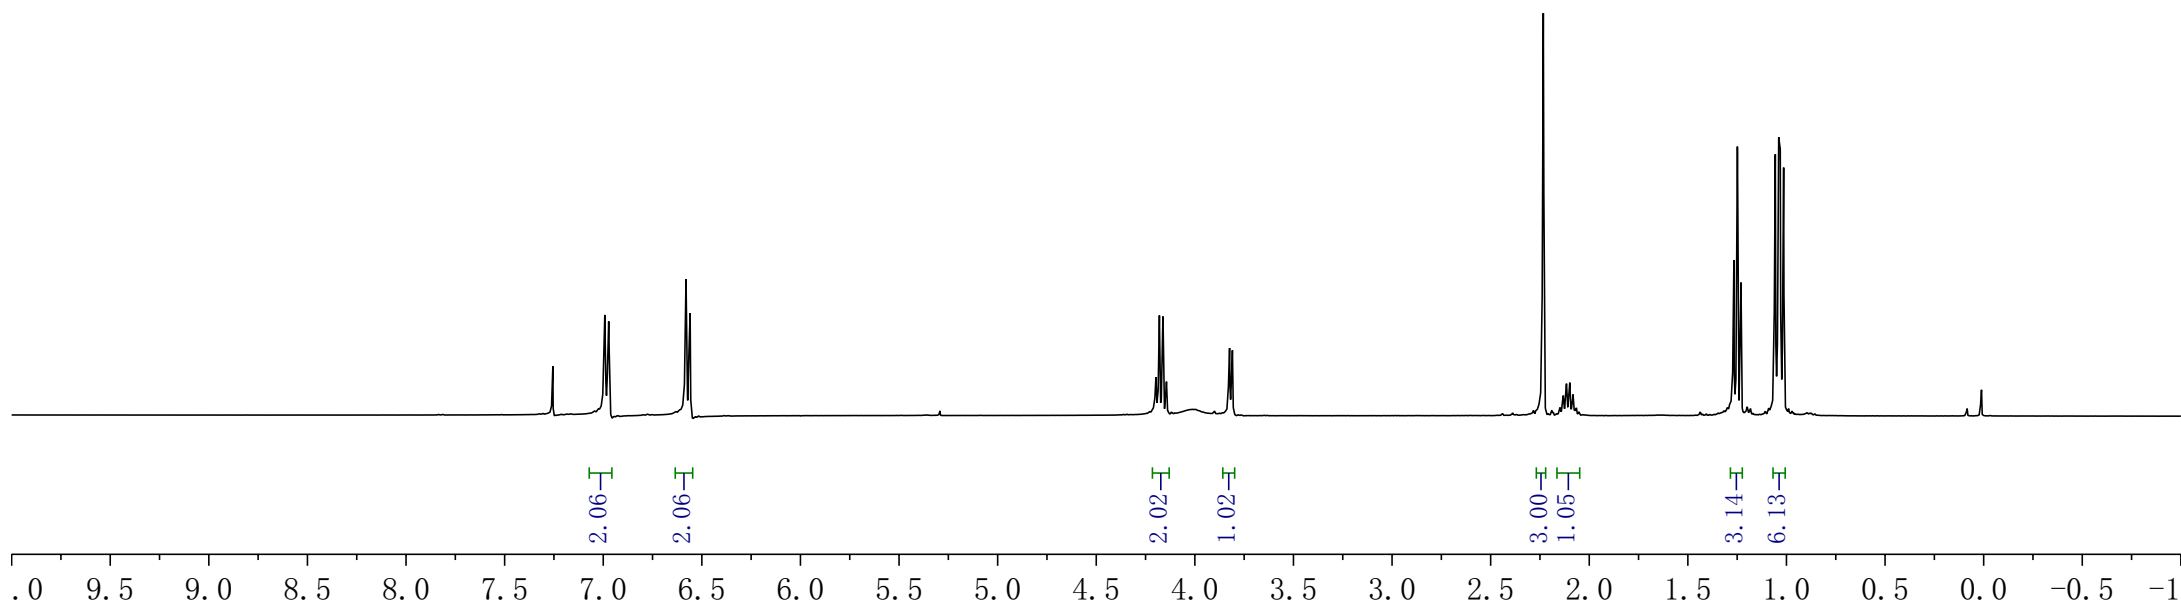

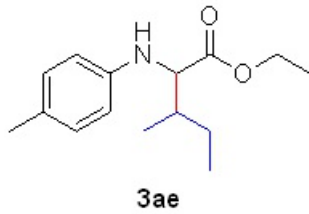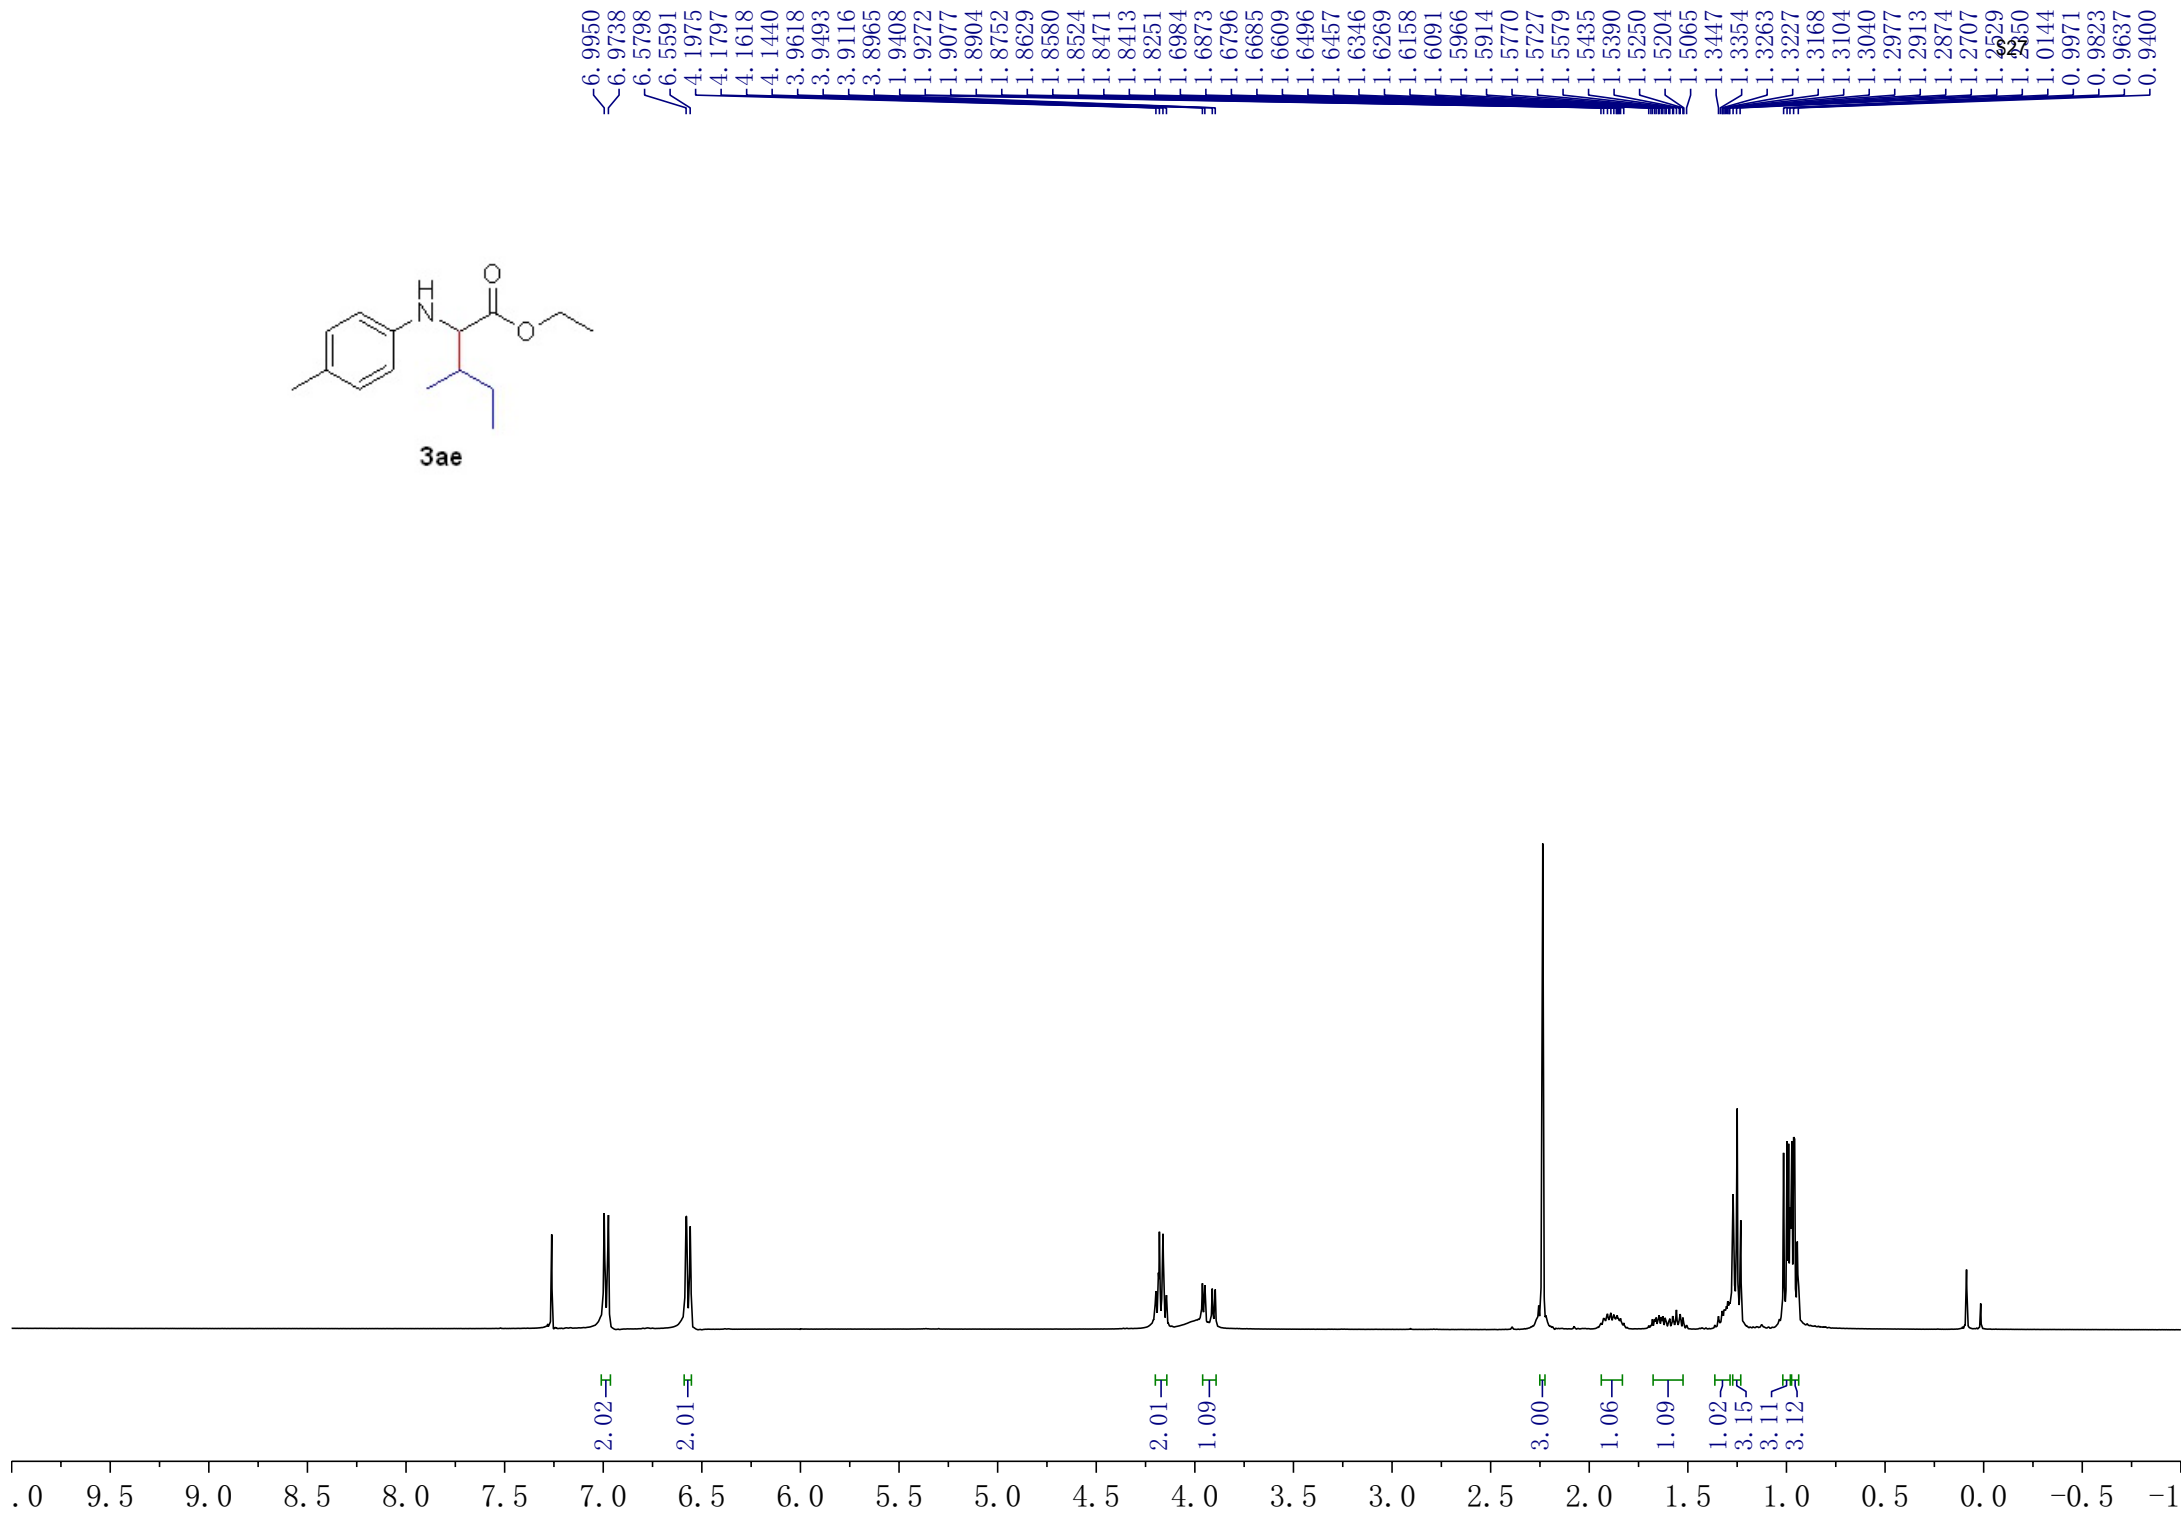

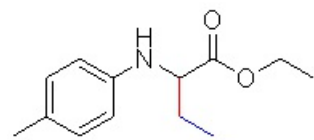

3af

6.9952  
6.9741

6.5674  
6.5468

4.2109  
4.1932  
4.1753  
4.1575  
4.0043  
3.9889  
3.9730

2.2341  
1.9346  
1.9172  
1.9001  
1.8830  
1.8654  
1.8473  
1.8278  
1.8094  
1.7924  
1.7747  
1.7569  
1.7395  
1.2731  
1.2552  
1.2374  
1.0224  
1.0041  
0.9852

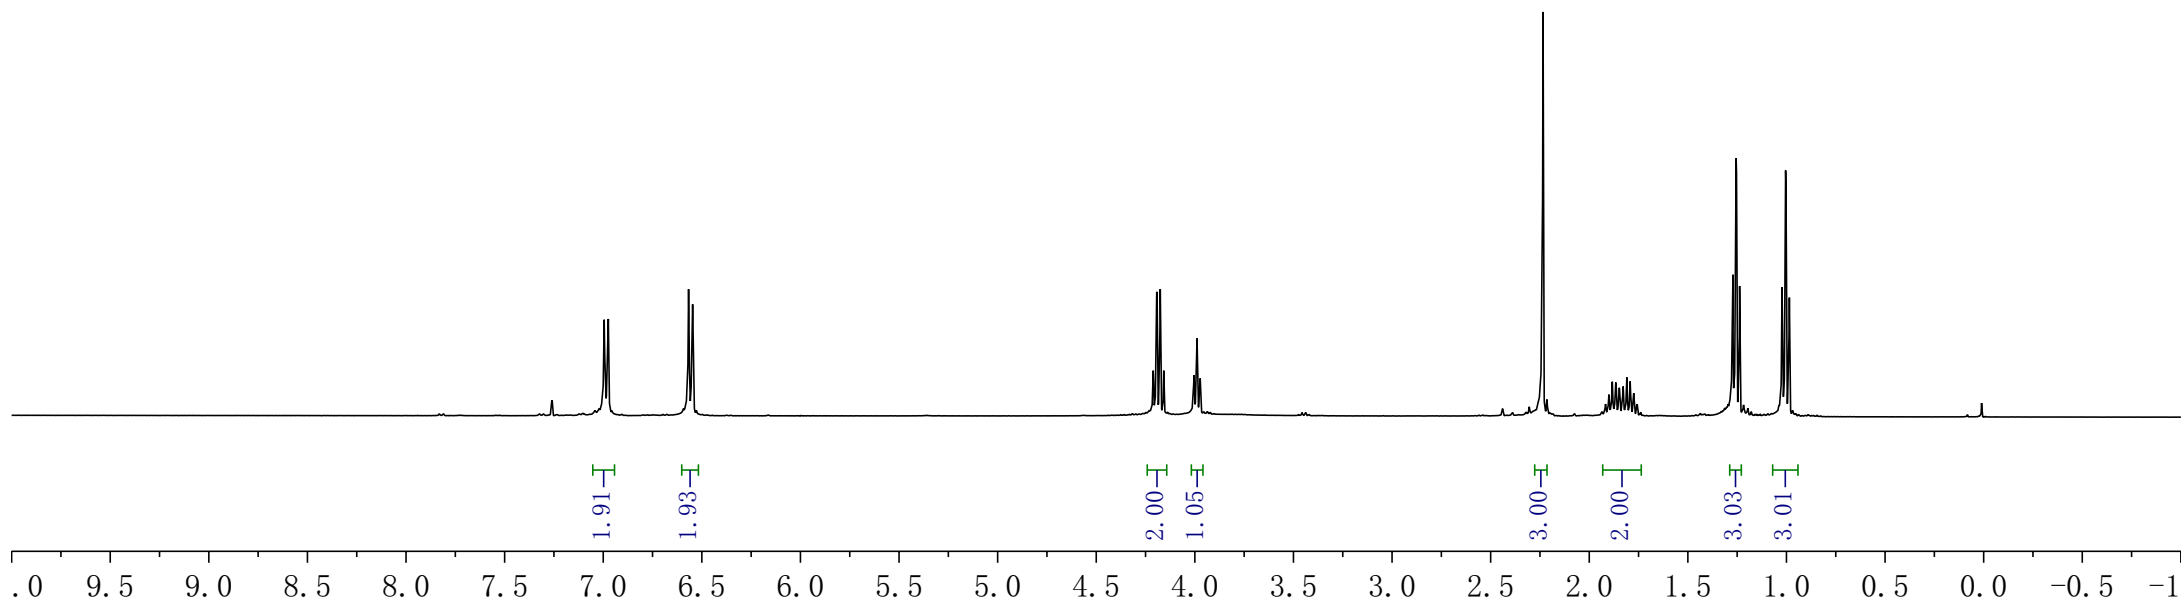

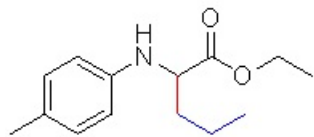

3ag

6.9817  
6.9621

6.5532  
6.5362

4.1861  
4.1681  
4.1503  
4.1325  
4.0278  
4.0126  
3.9952

2.2218  
1.8239  
1.8060  
1.7904  
1.7862  
1.7708  
1.7554  
1.7382  
1.7213  
1.7043  
1.6874  
1.6661  
1.4951  
1.4771  
1.4592  
1.4407  
1.4226  
1.4043  
1.3829  
1.3651  
1.2173  
0.9623  
0.9439  
0.9256

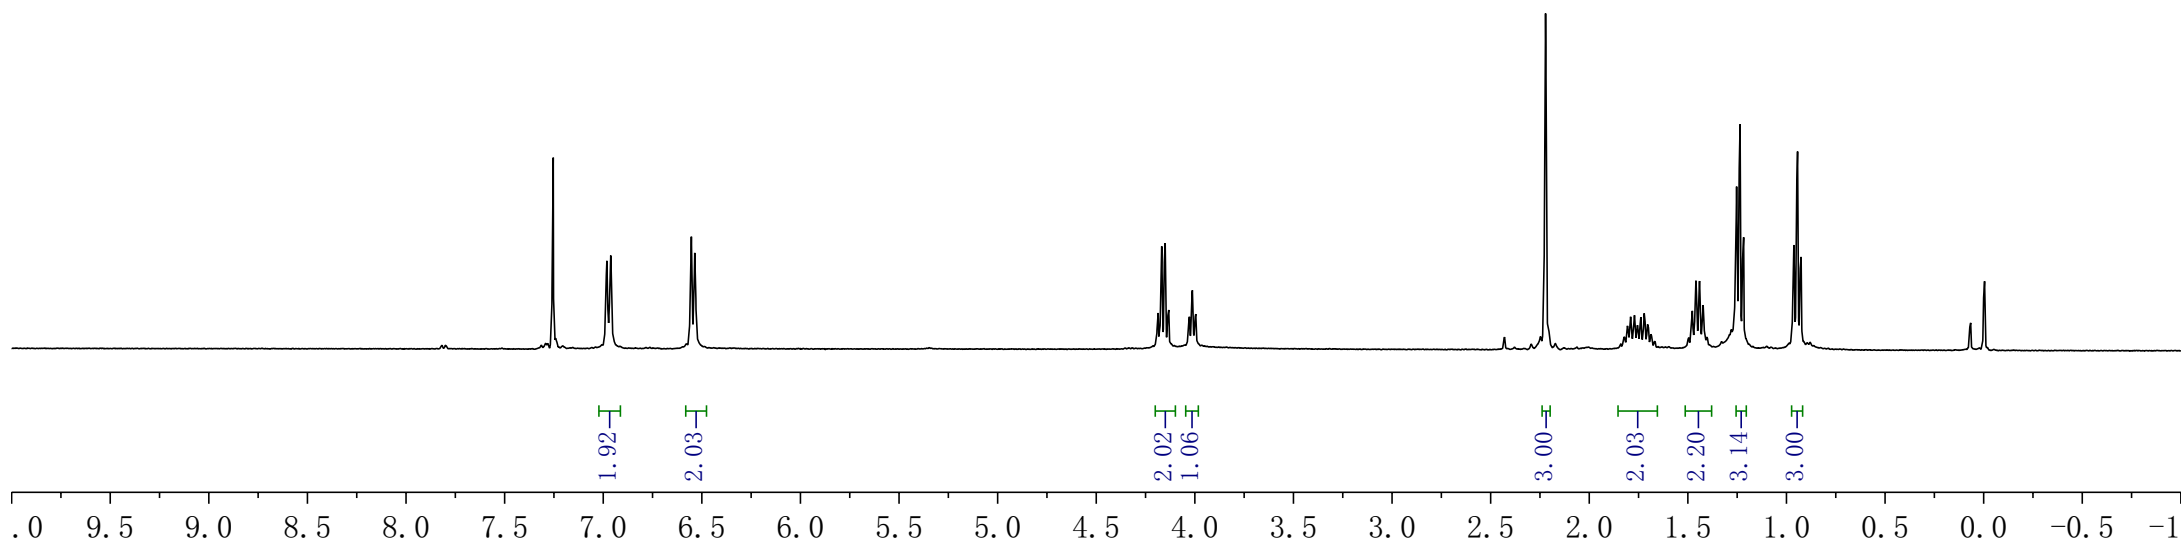

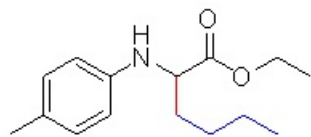

3ah

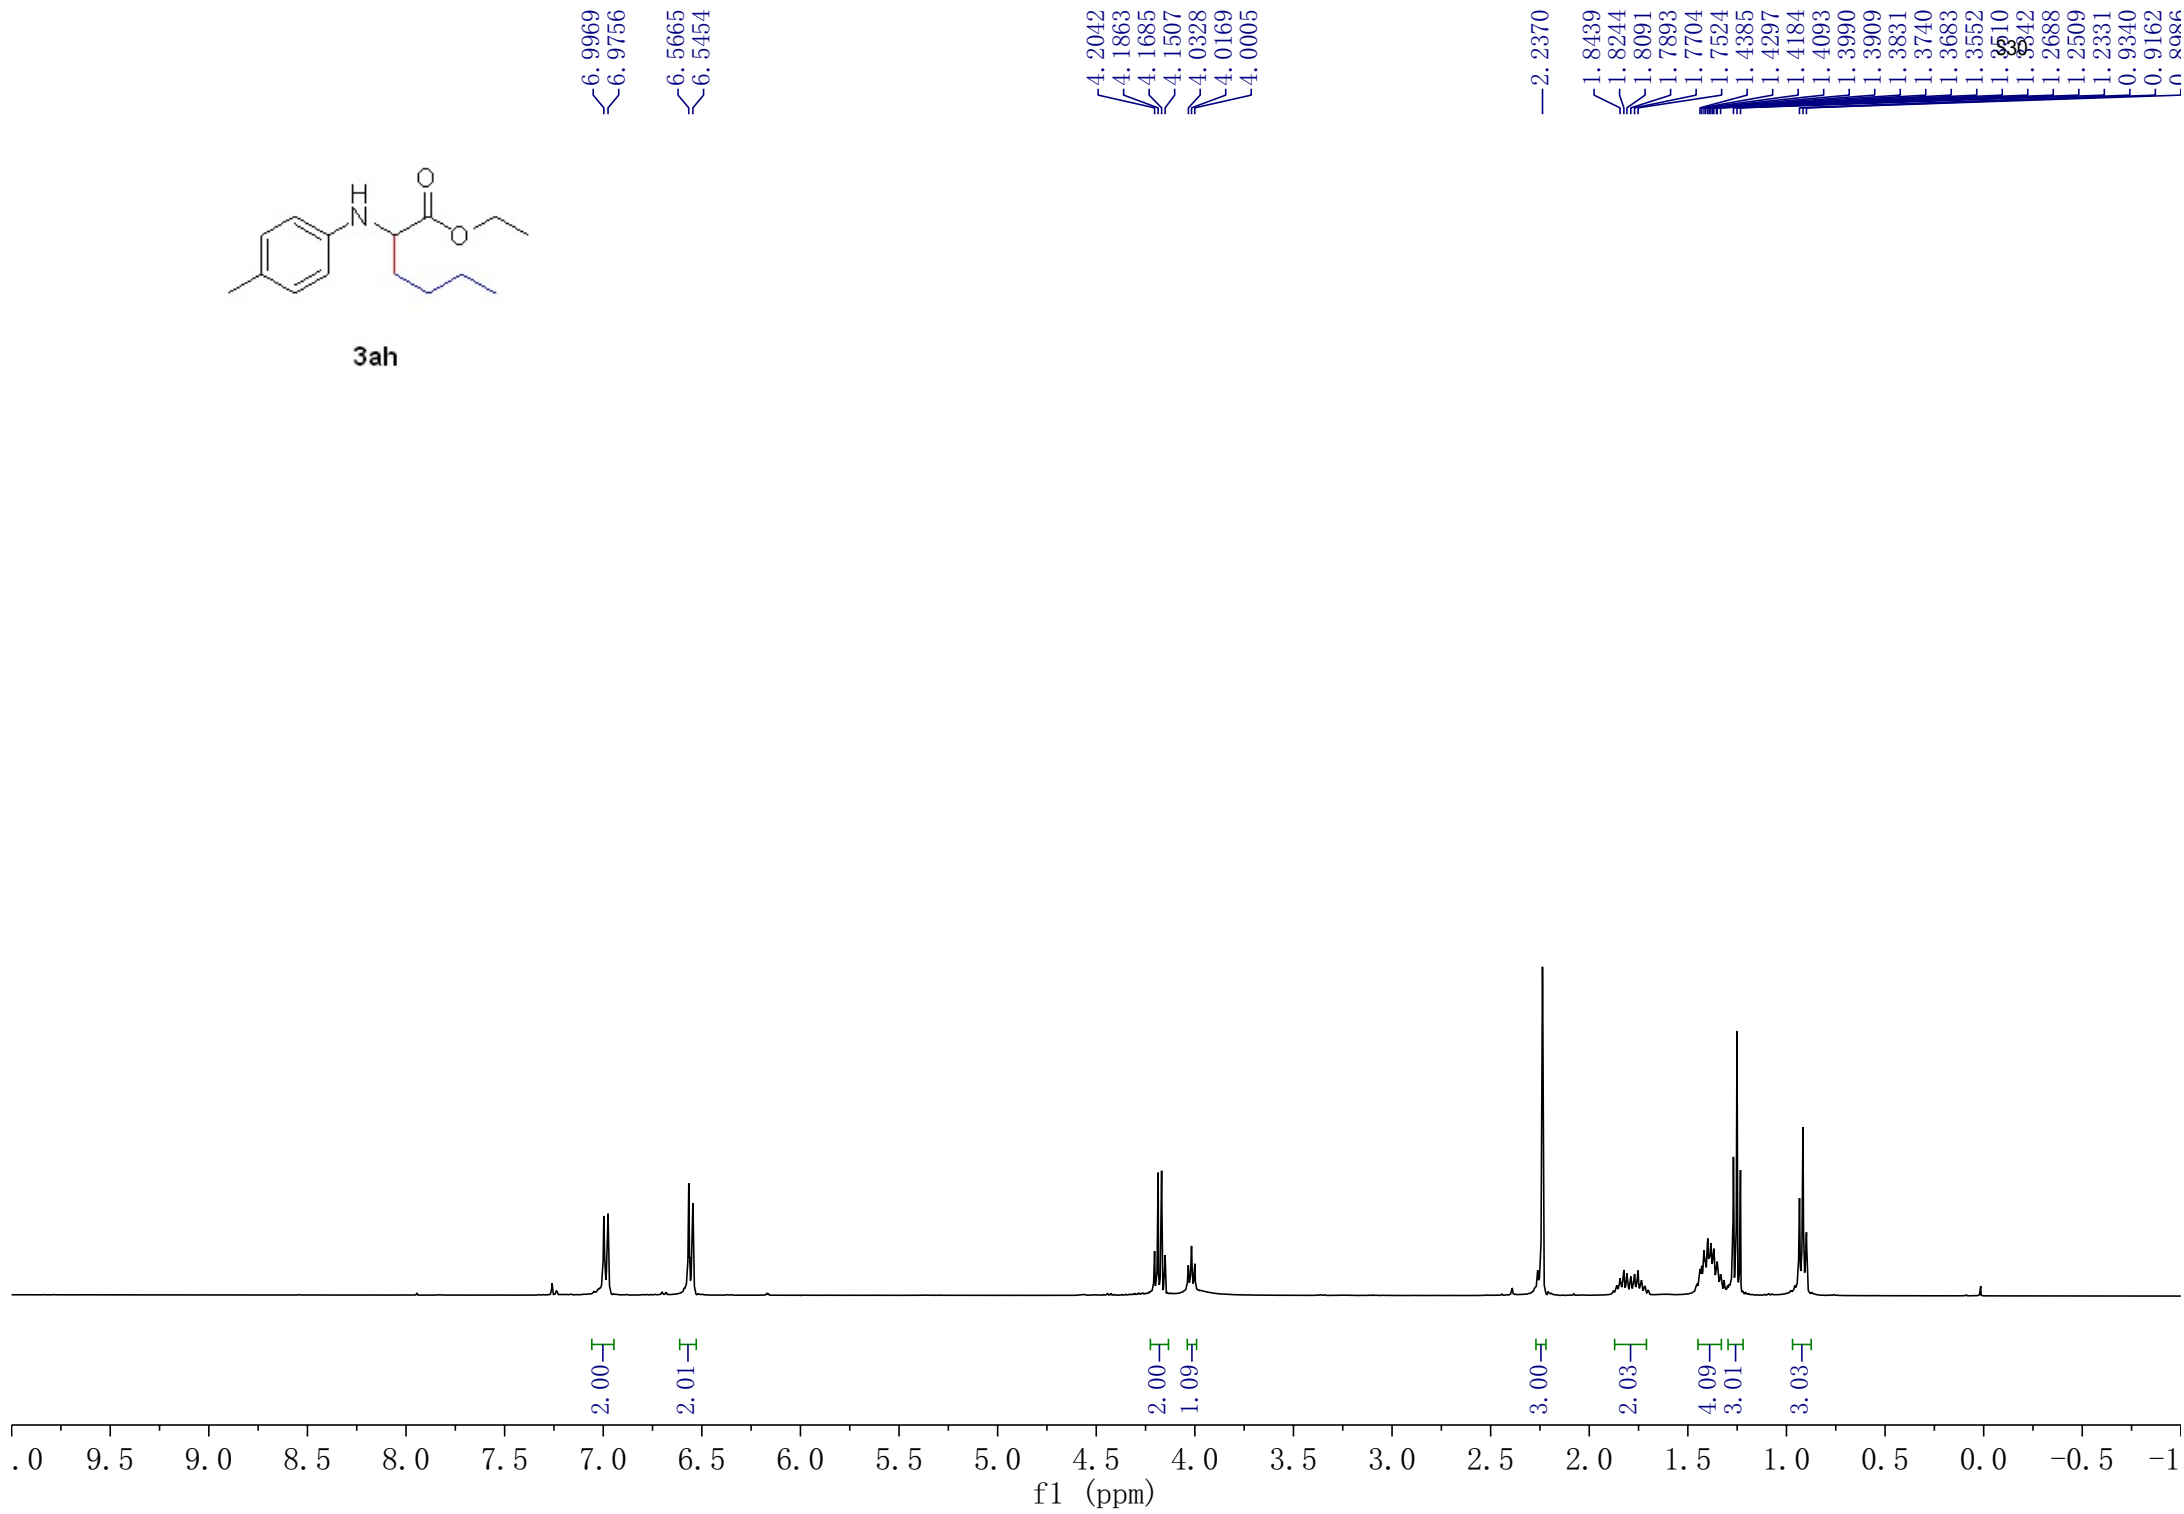

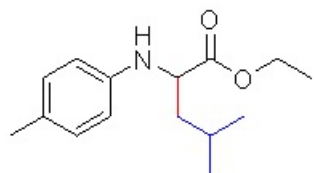

**3ai**

6.9849  
6.9650

6.5602  
6.5391

4.1750  
4.1572  
4.1395  
4.1217  
4.0395  
3.8529

2.2254  
1.8607  
1.8438  
1.8269  
1.8101  
1.7933  
1.7763  
1.7596  
1.6458  
1.6290  
1.6254  
1.6117  
1.6070  
1.2469  
1.2291  
1.2113  
0.9969  
0.9804  
0.9513  
0.9349

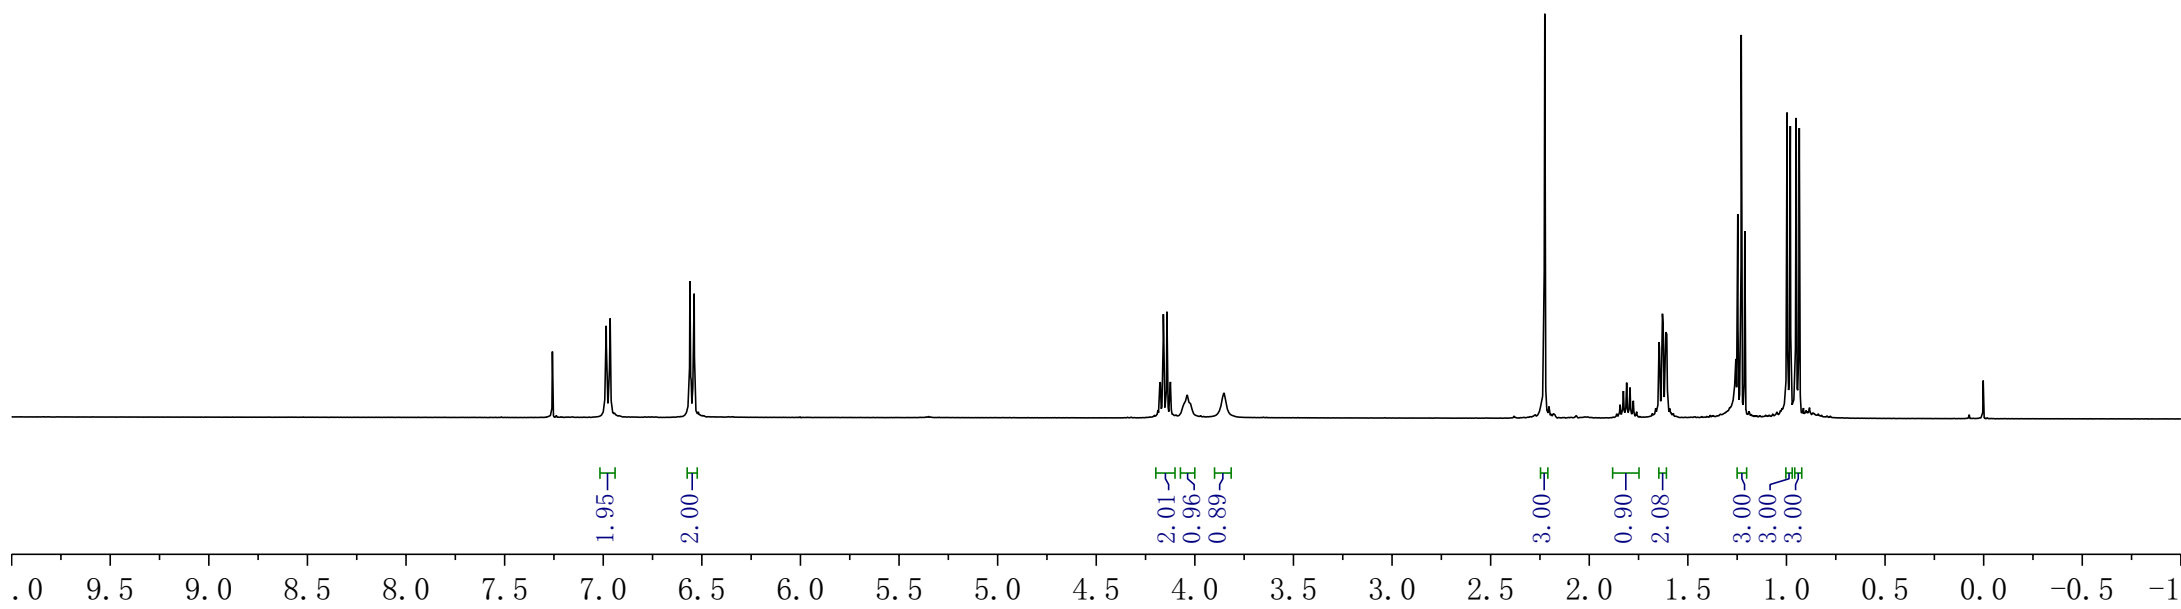

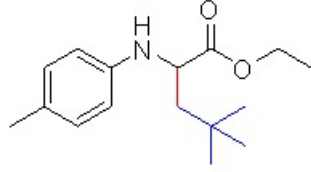

3aj

6.9914  
6.9703

6.5623  
6.5413

4.1978  
4.1945  
4.1800  
4.1766  
4.1674  
4.1621  
4.1586  
4.1496  
4.1337  
4.1319  
4.1160  
4.1068  
4.0982  
4.0932  
4.0889  
4.0487  
3.7733

2.2297  
1.7845  
1.7721  
1.7492  
1.7367  
1.6078  
1.5893  
1.5724  
1.5539  
1.2421  
1.2242  
1.2064  
1.0016

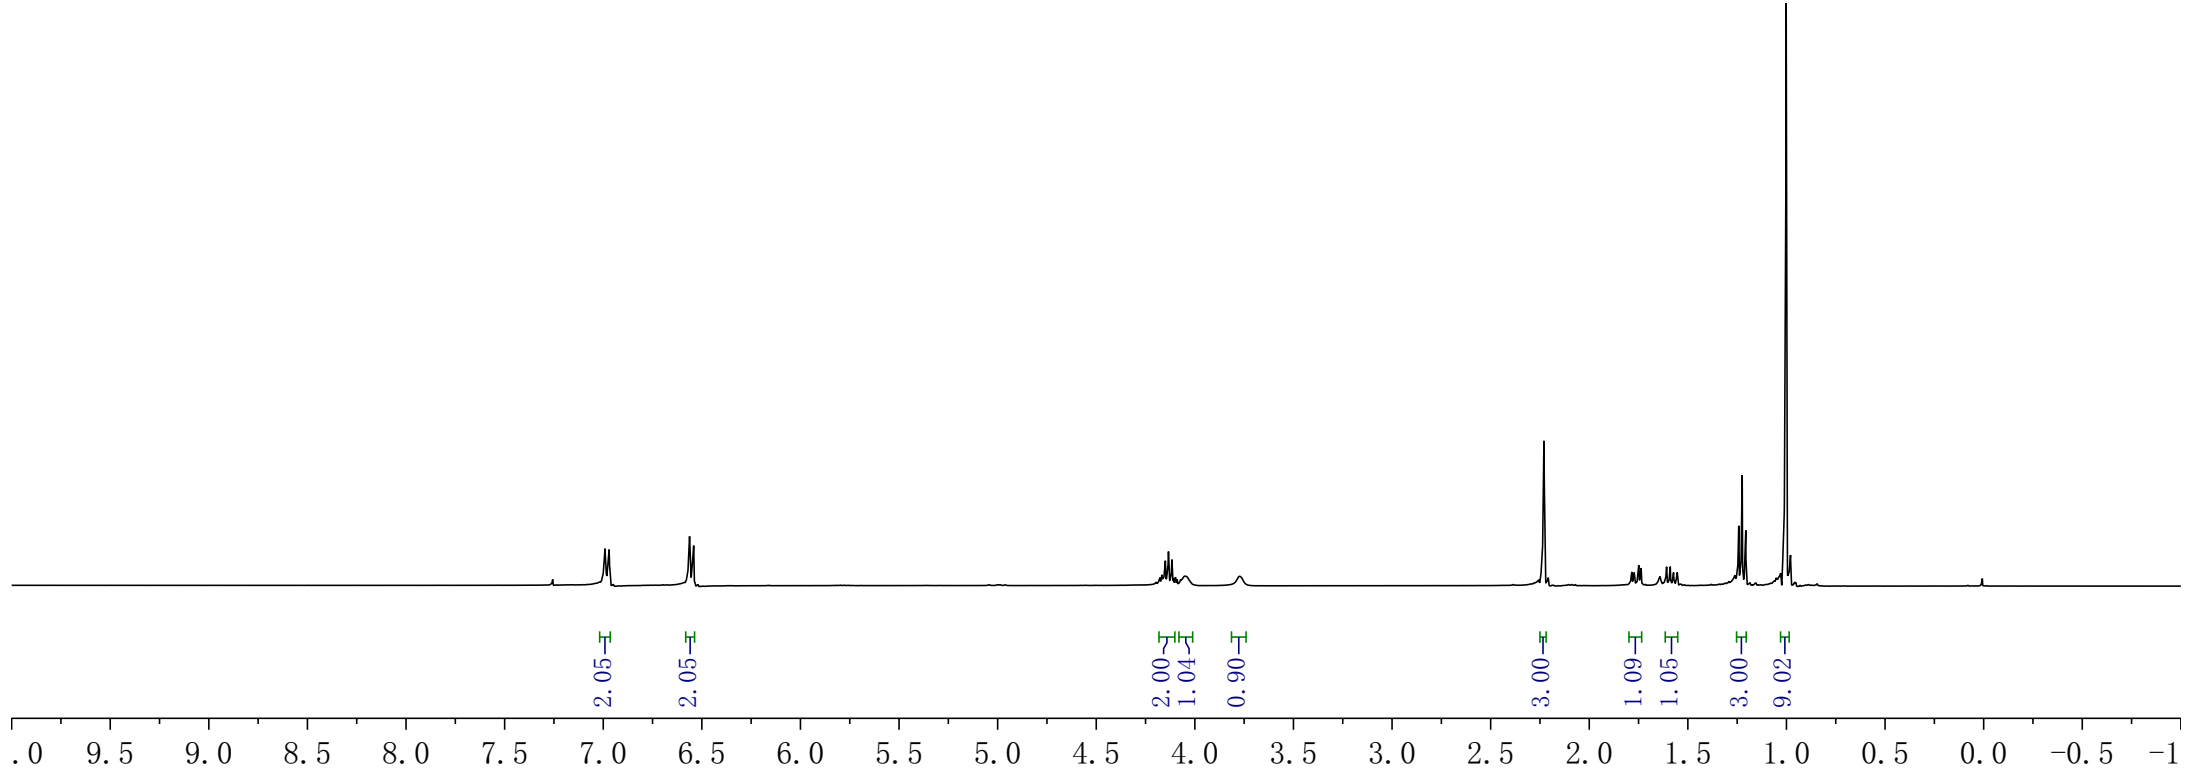



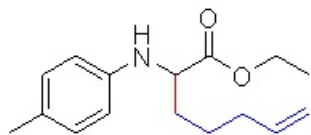

**3ak**

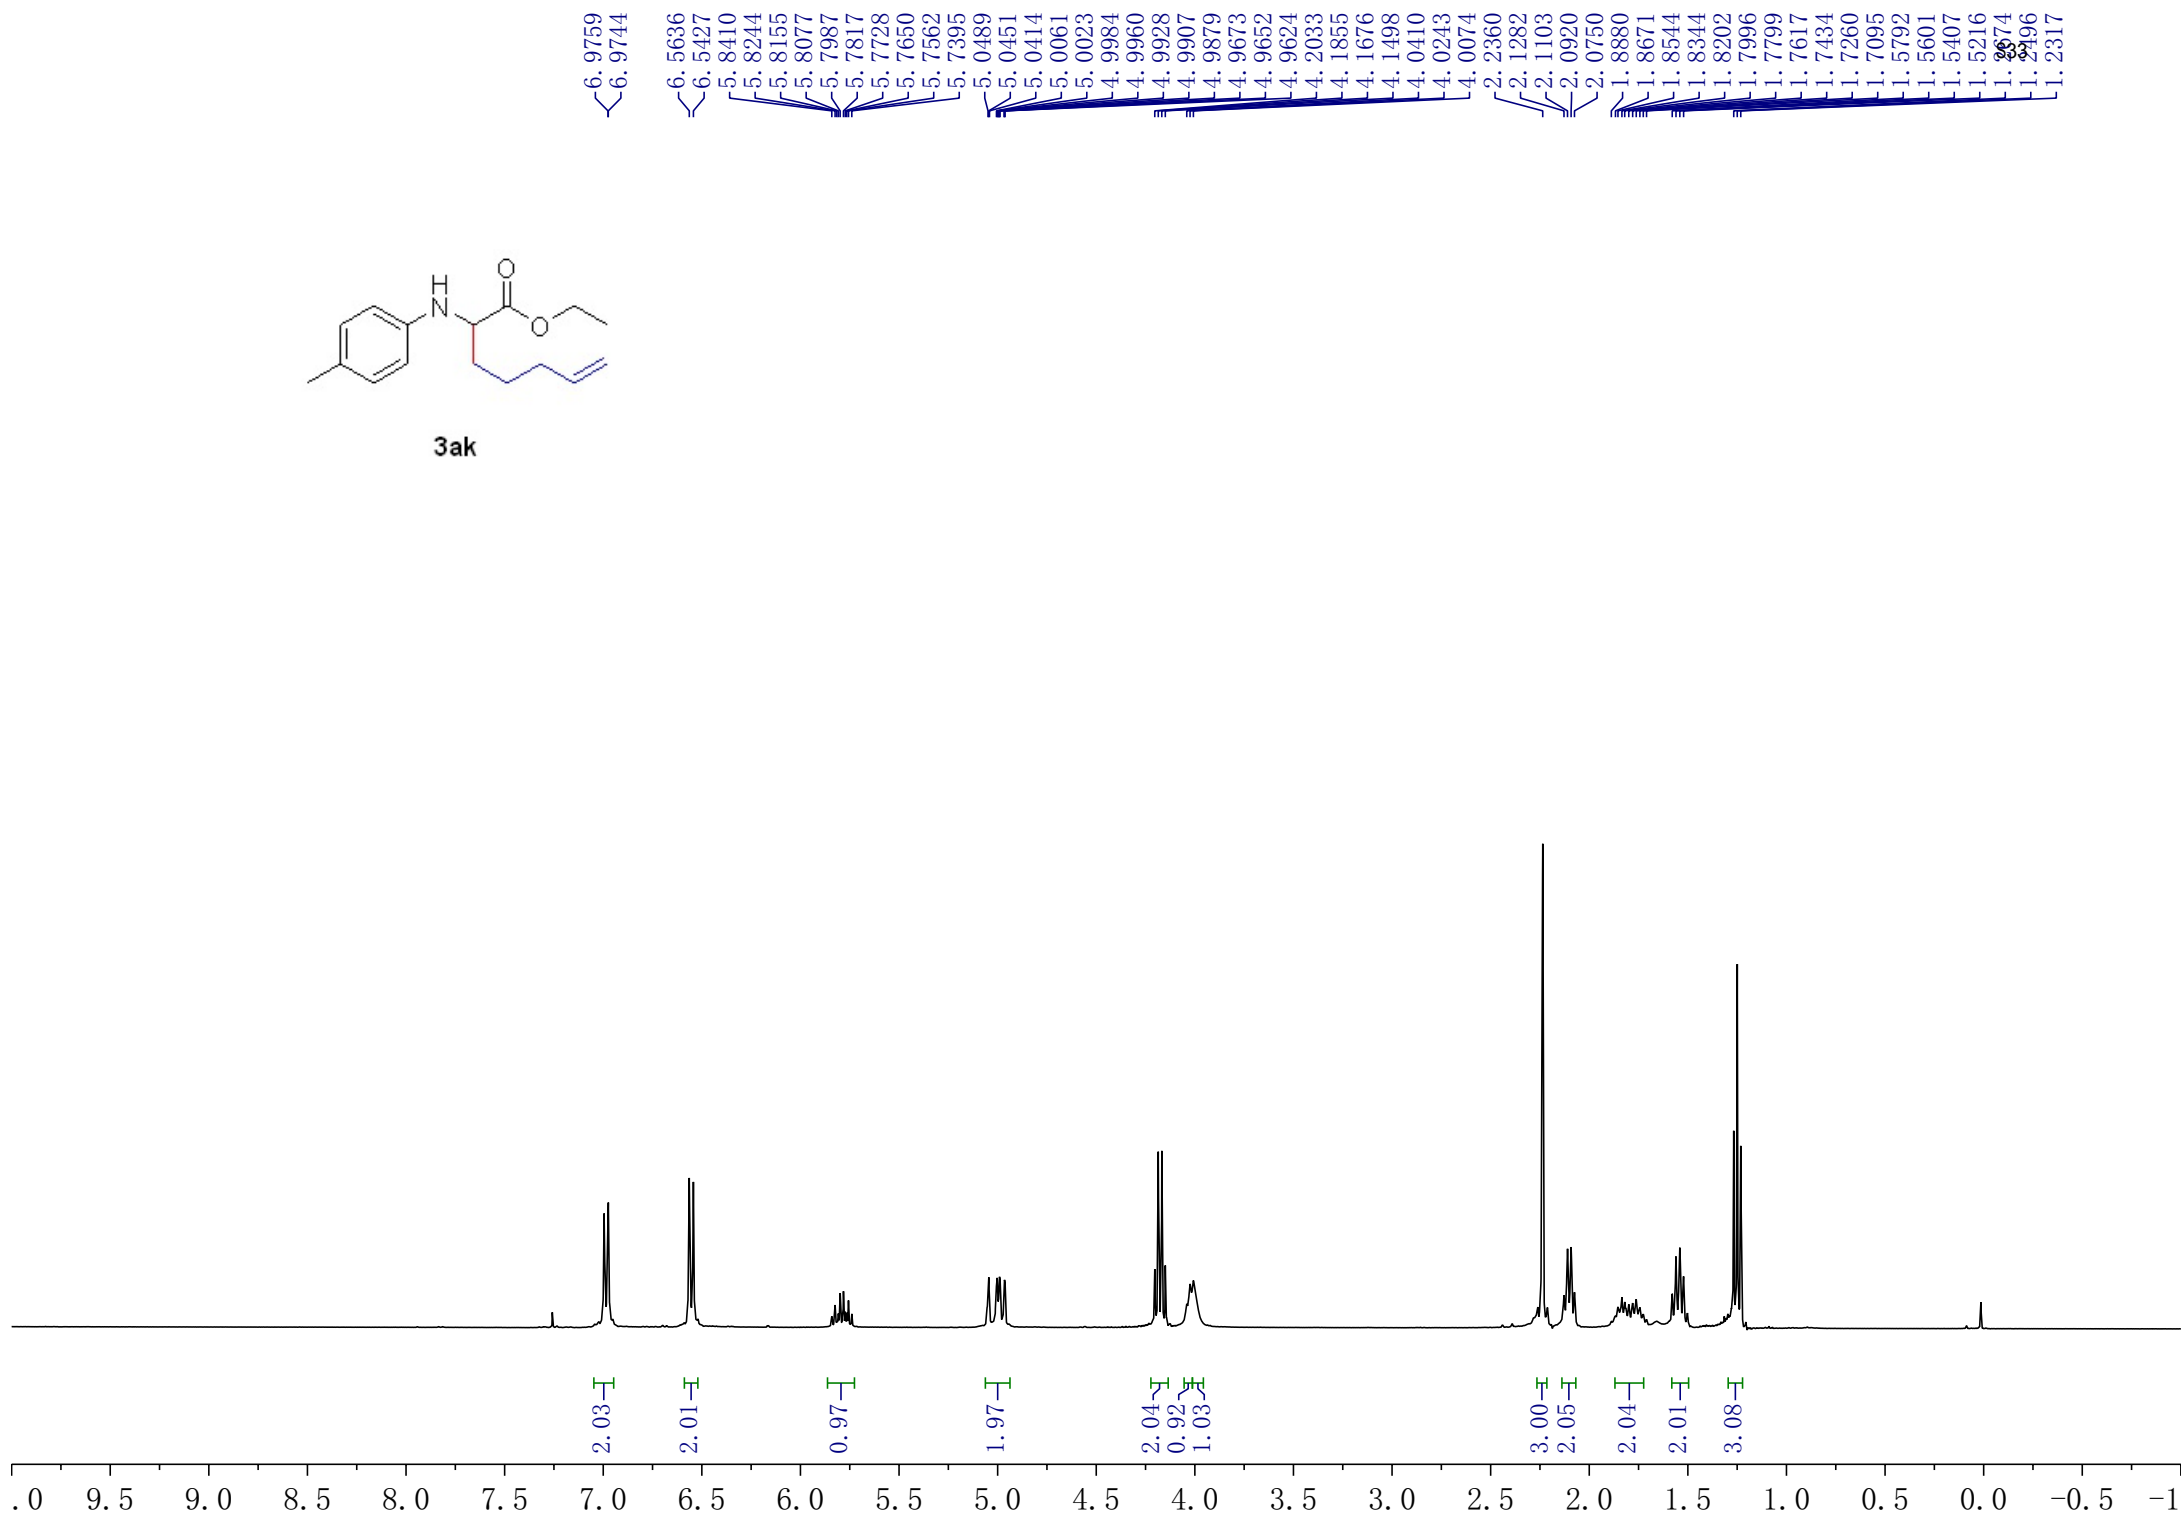

7.3135  
7.3111  
7.3071  
7.2977  
7.2926  
7.2785  
7.2749  
7.2253  
7.2222  
7.2055  
7.2015  
7.1882  
7.1848  
6.9854  
6.9654  
6.5342  
6.5131

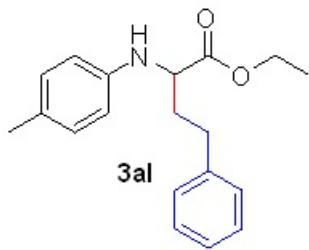

4.1886  
4.1708  
4.1529  
4.1352  
4.0356  
4.0212  
2.7905  
2.7710  
2.7512  
2.2315  
2.2032  
2.1889  
2.1828  
2.1689  
2.1487  
2.1349  
2.1151  
2.0830  
2.0648  
2.0455  
2.0297  
2.0113  
1.9925  
1.2639  
1.2461  
1.2283

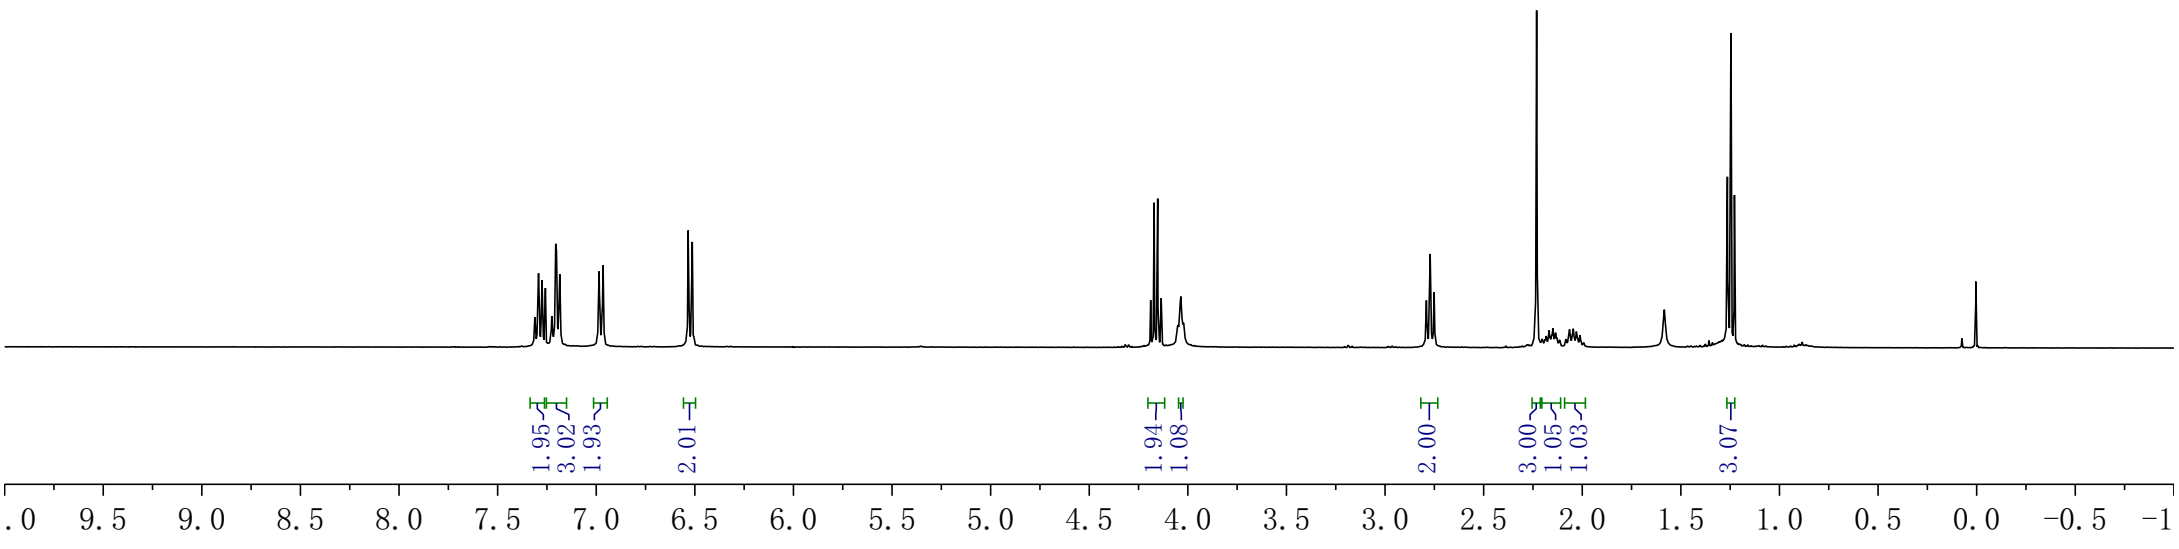

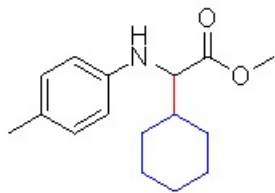

3ba

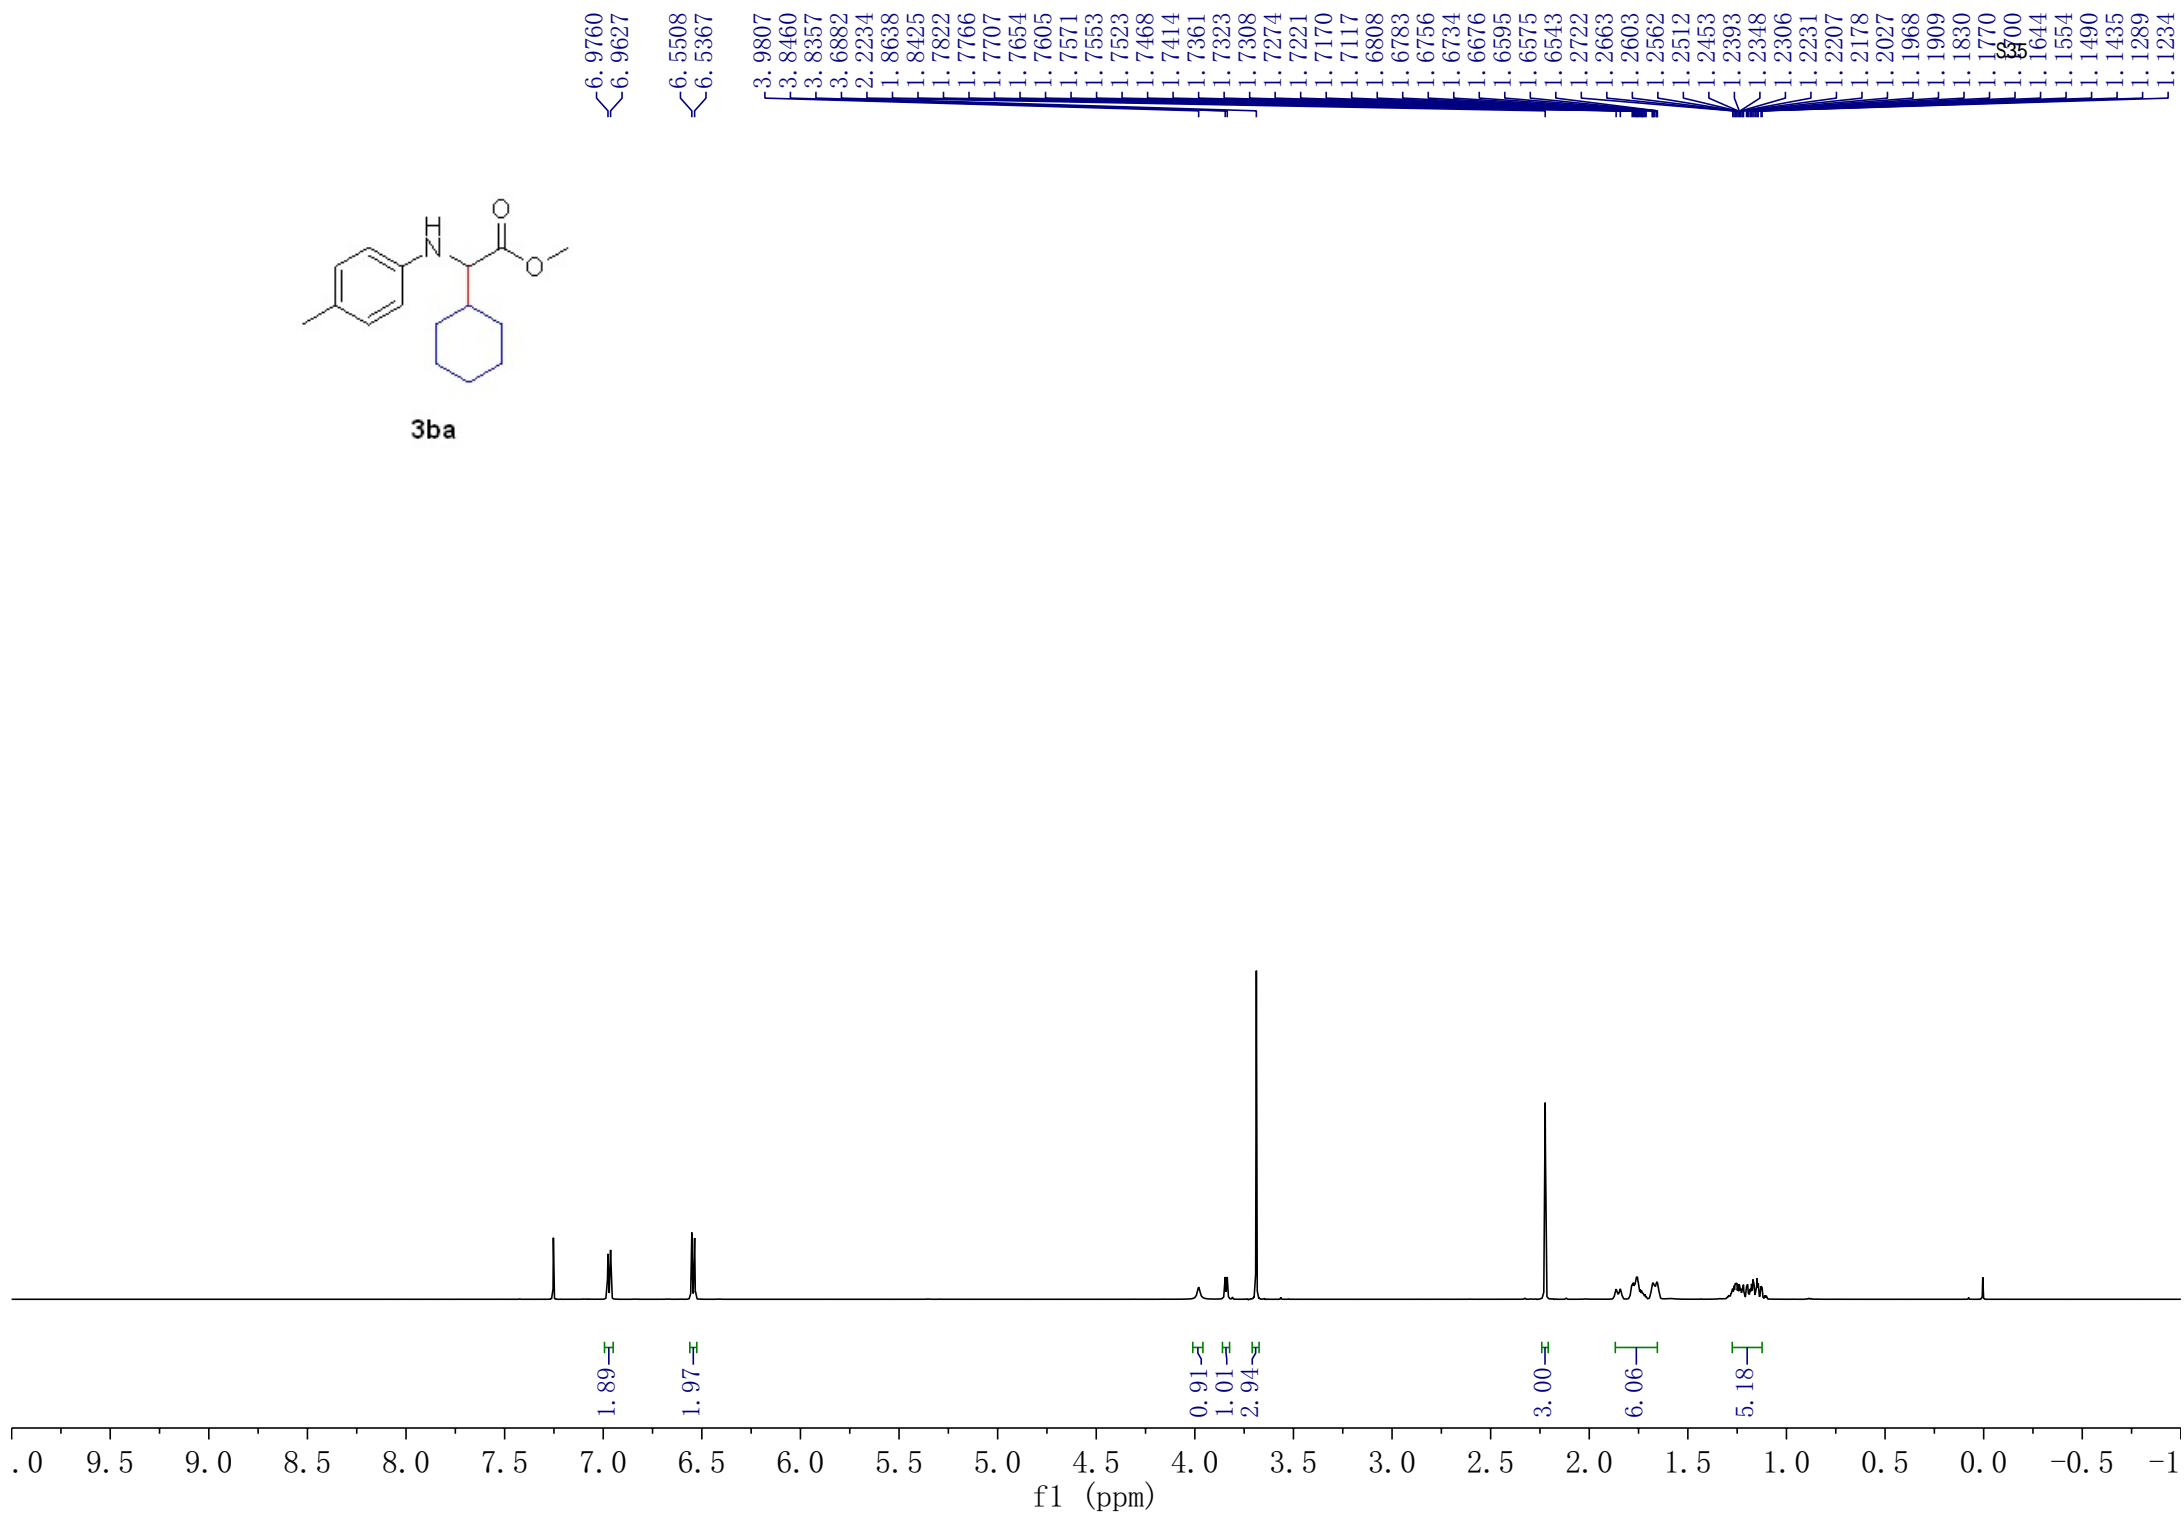

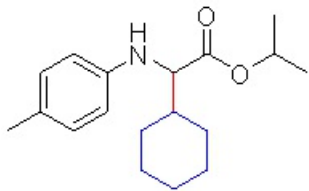

3ca

6.9847  
6.9653

6.5701  
6.5493

5.0874  
5.0719  
5.0562  
5.0441  
5.0405  
5.0284  
5.0249  
5.0093  
4.9938

4.0259  
3.8071  
3.7924

2.2323  
1.8756  
1.8446  
1.7929  
1.7641  
1.7259  
1.6966  
1.6660  
1.3970  
1.3812  
1.3609  
1.2872  
1.2716  
1.2407  
1.2246  
1.2045  
1.1820  
1.1534  
1.1228  
1.0808  
1.0647

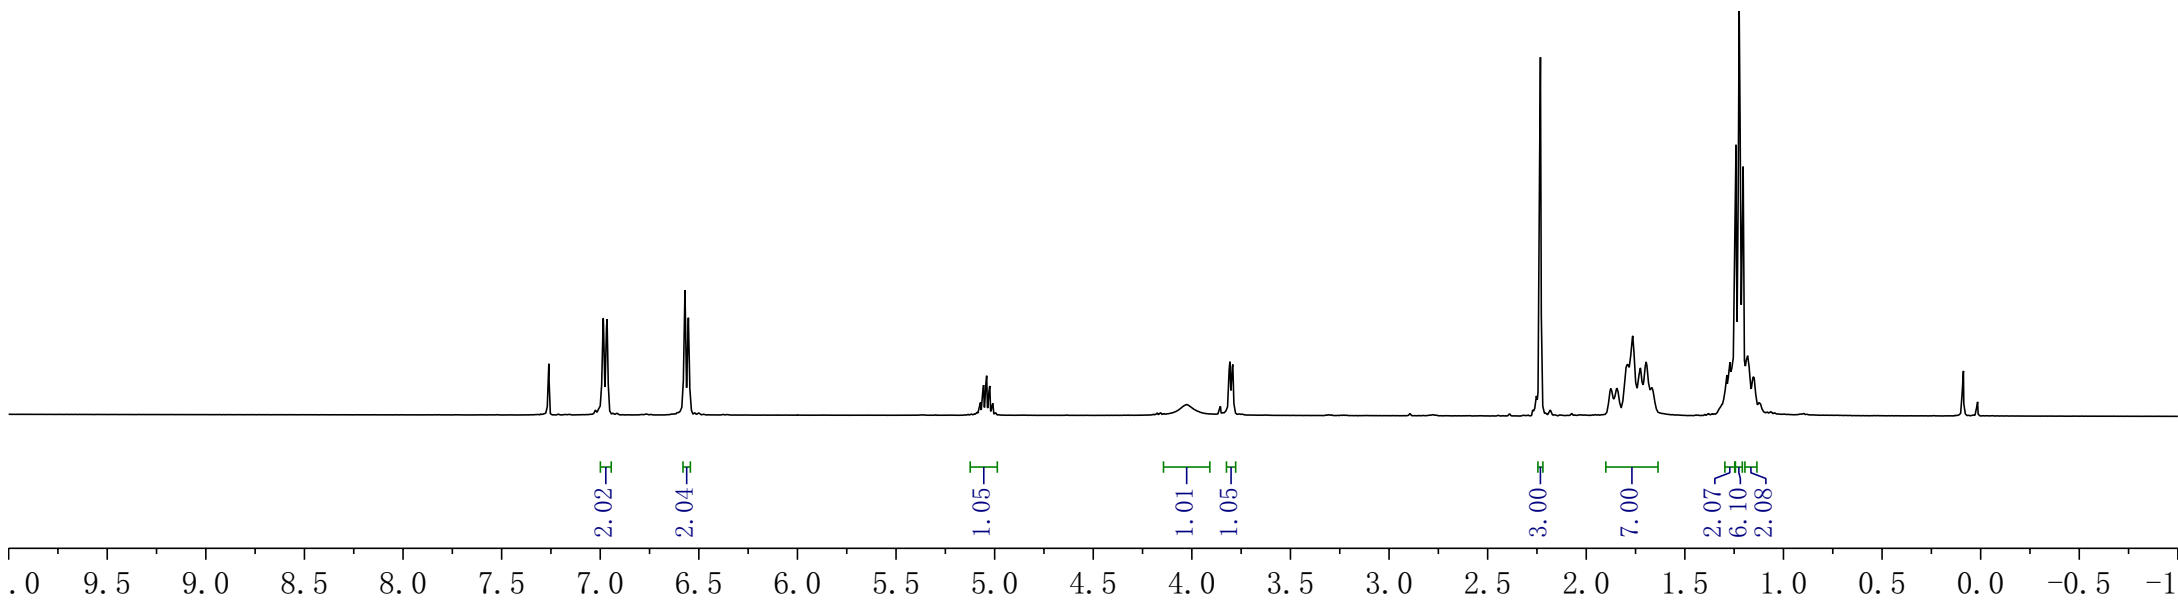

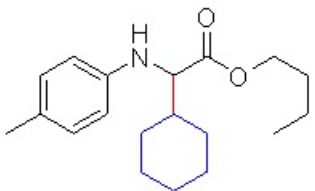

3da

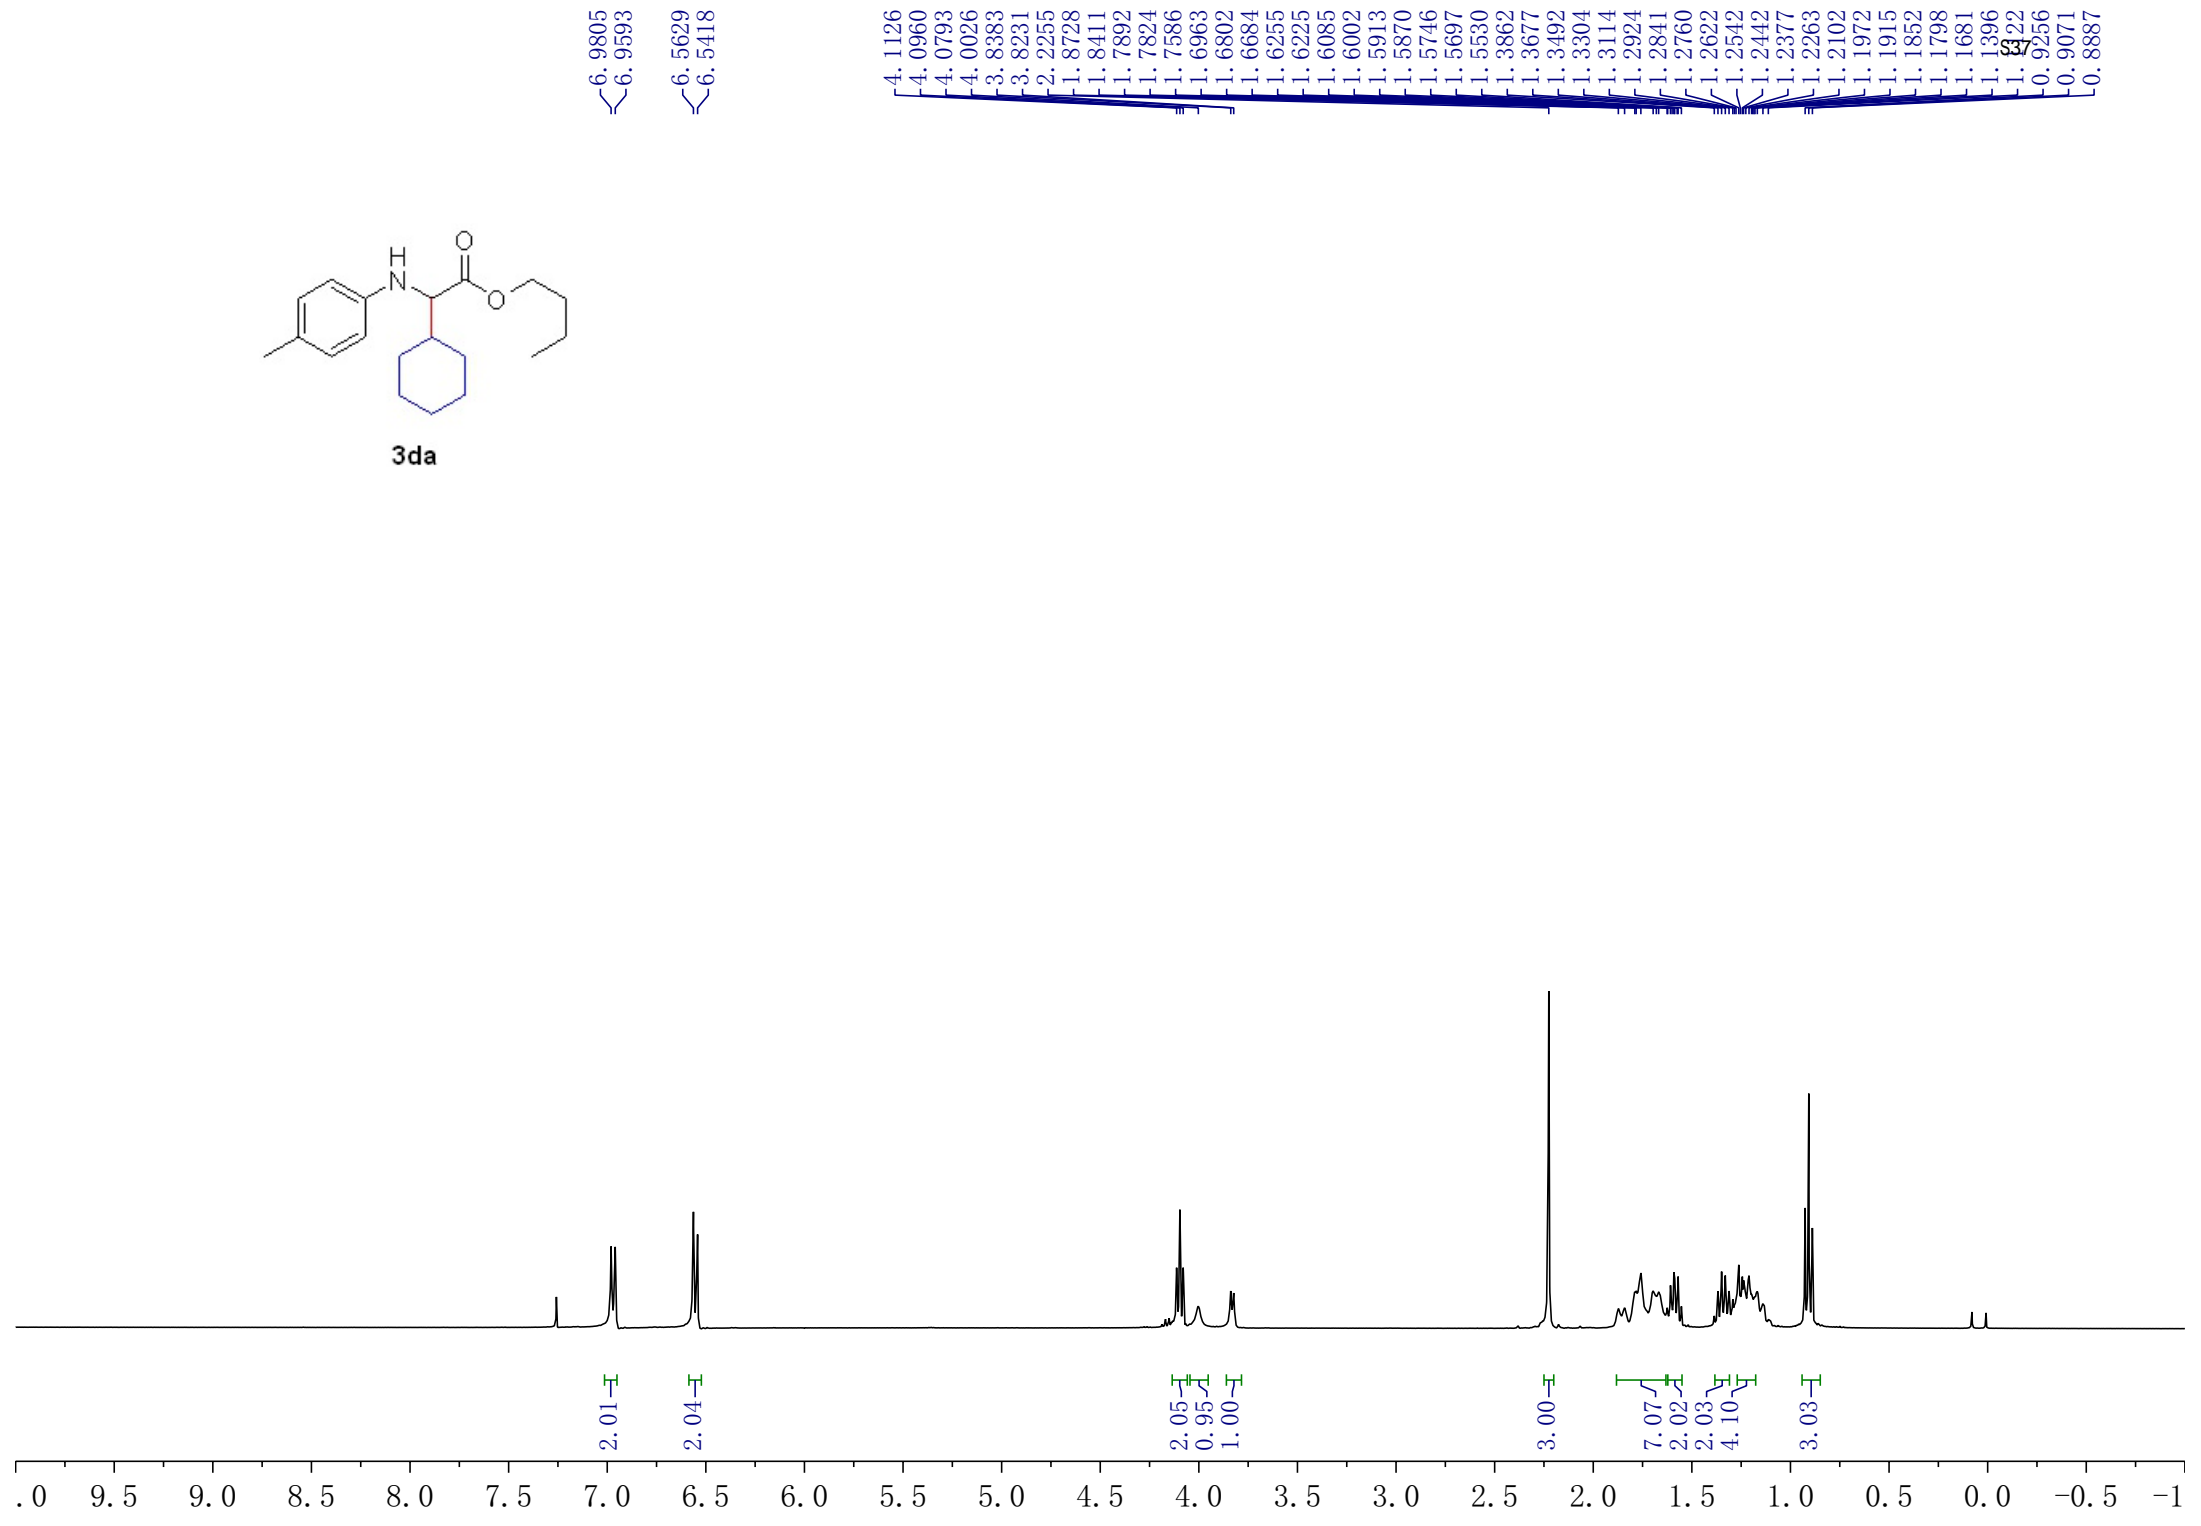

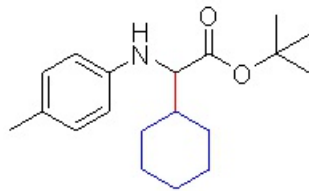

3ea

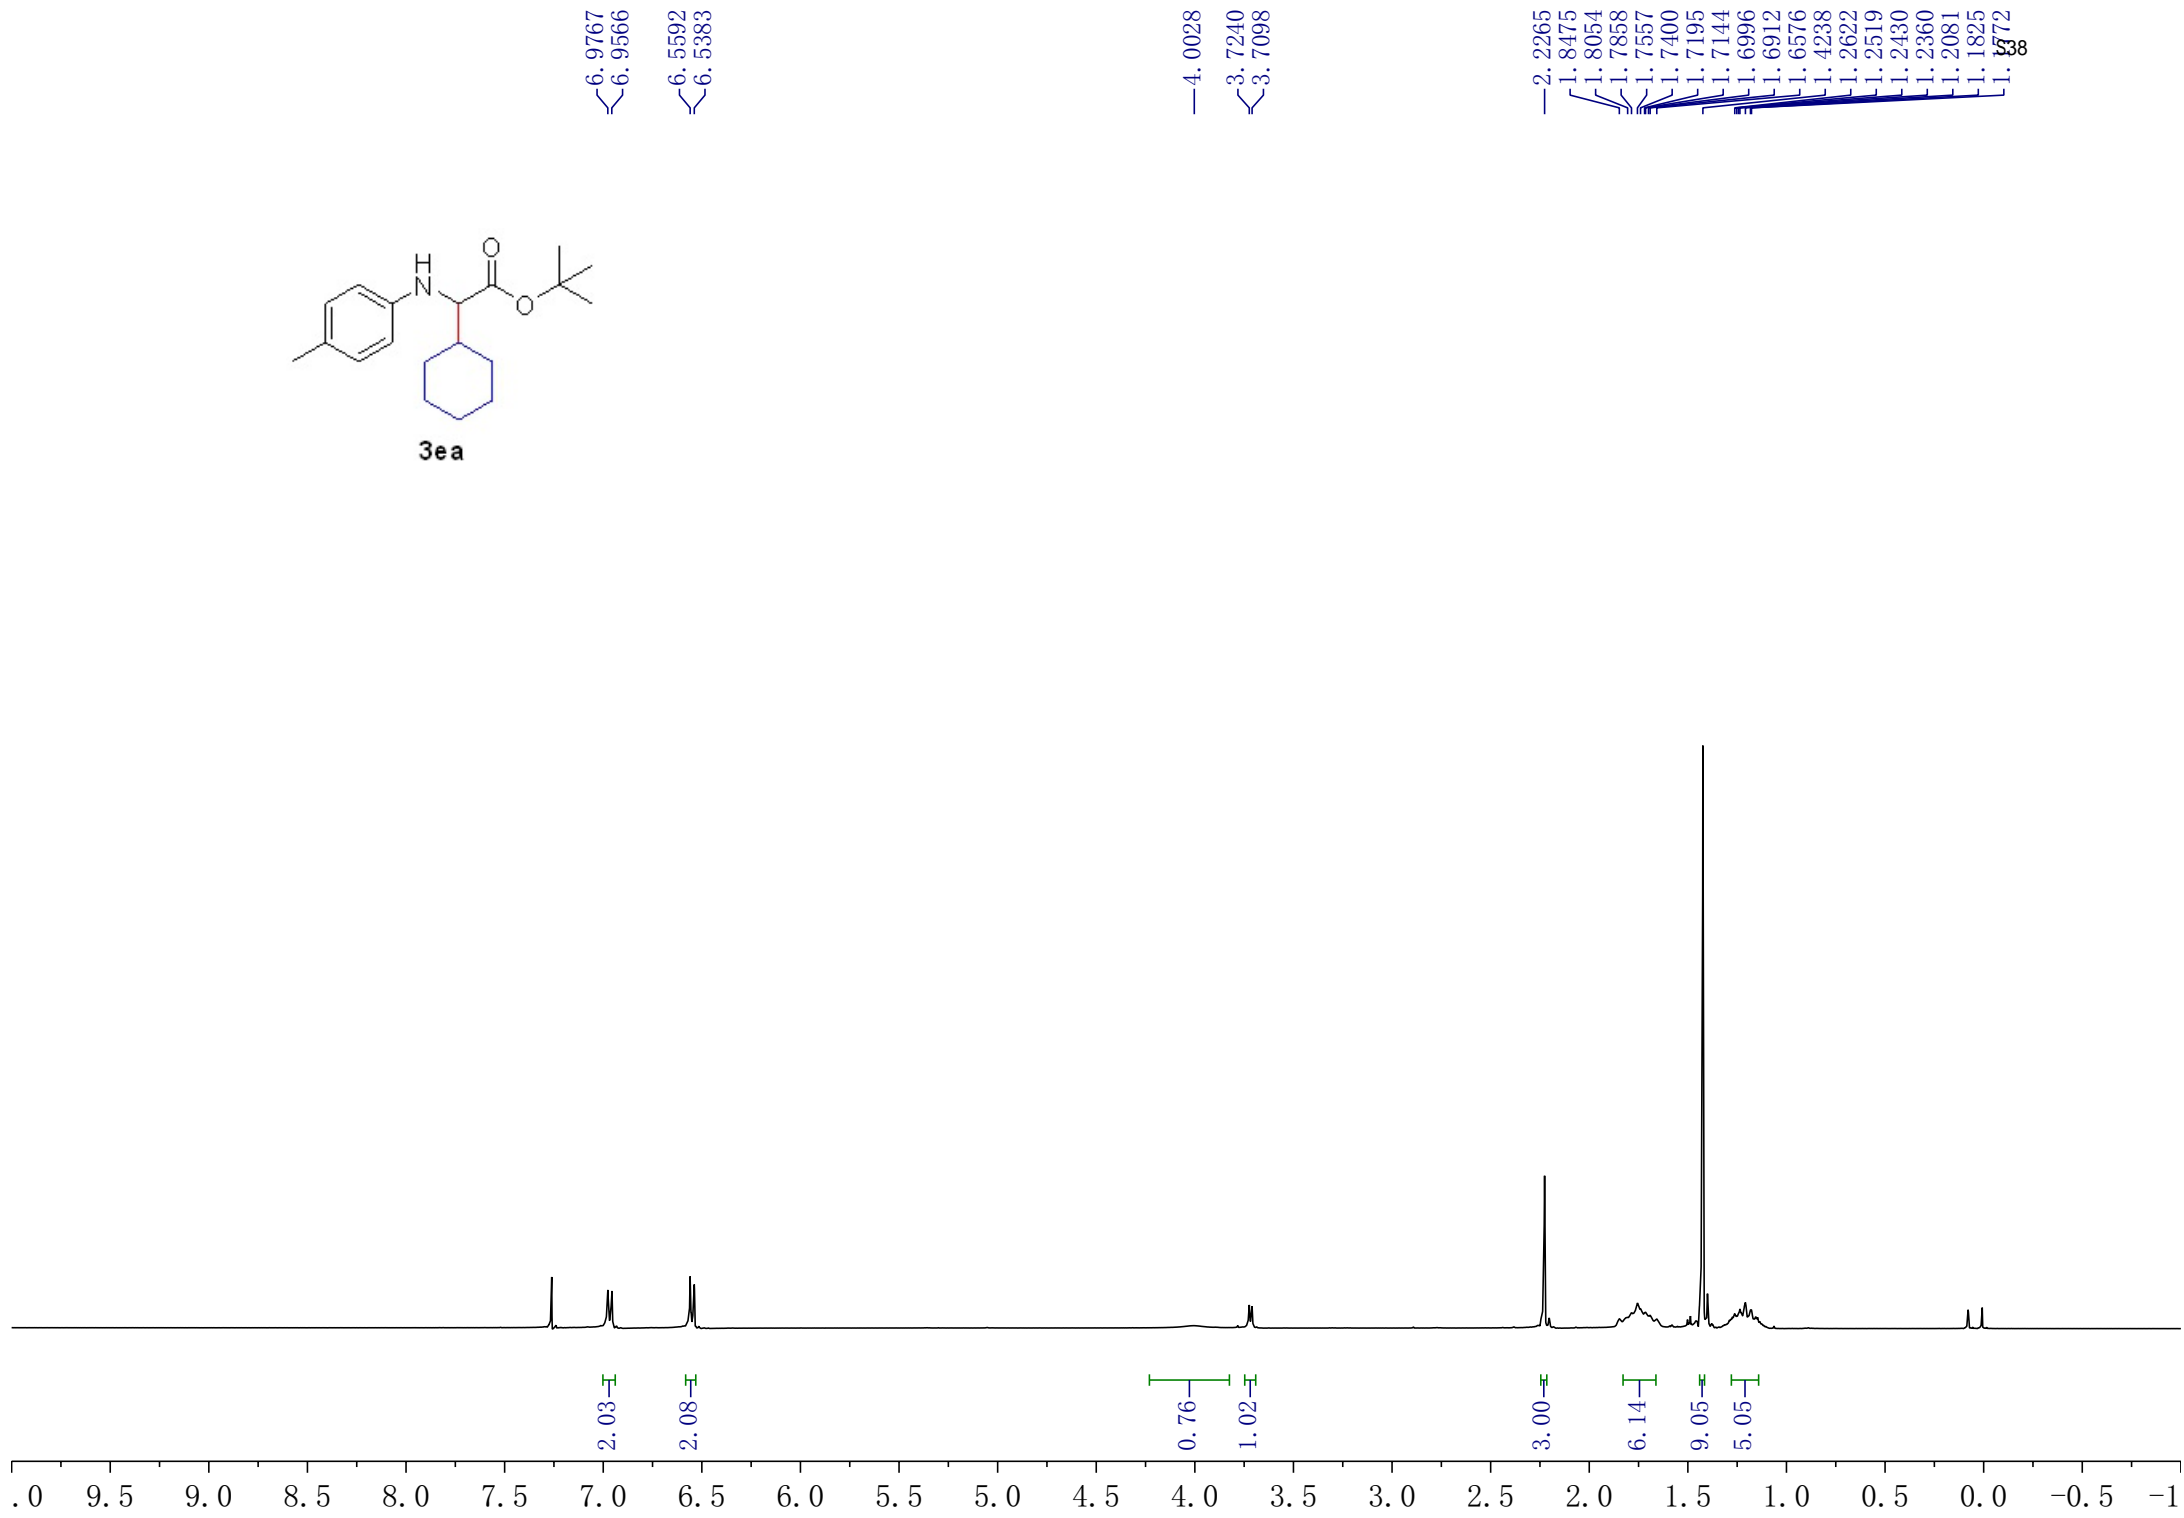

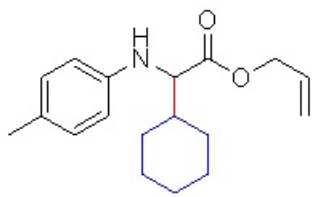

**3fa**

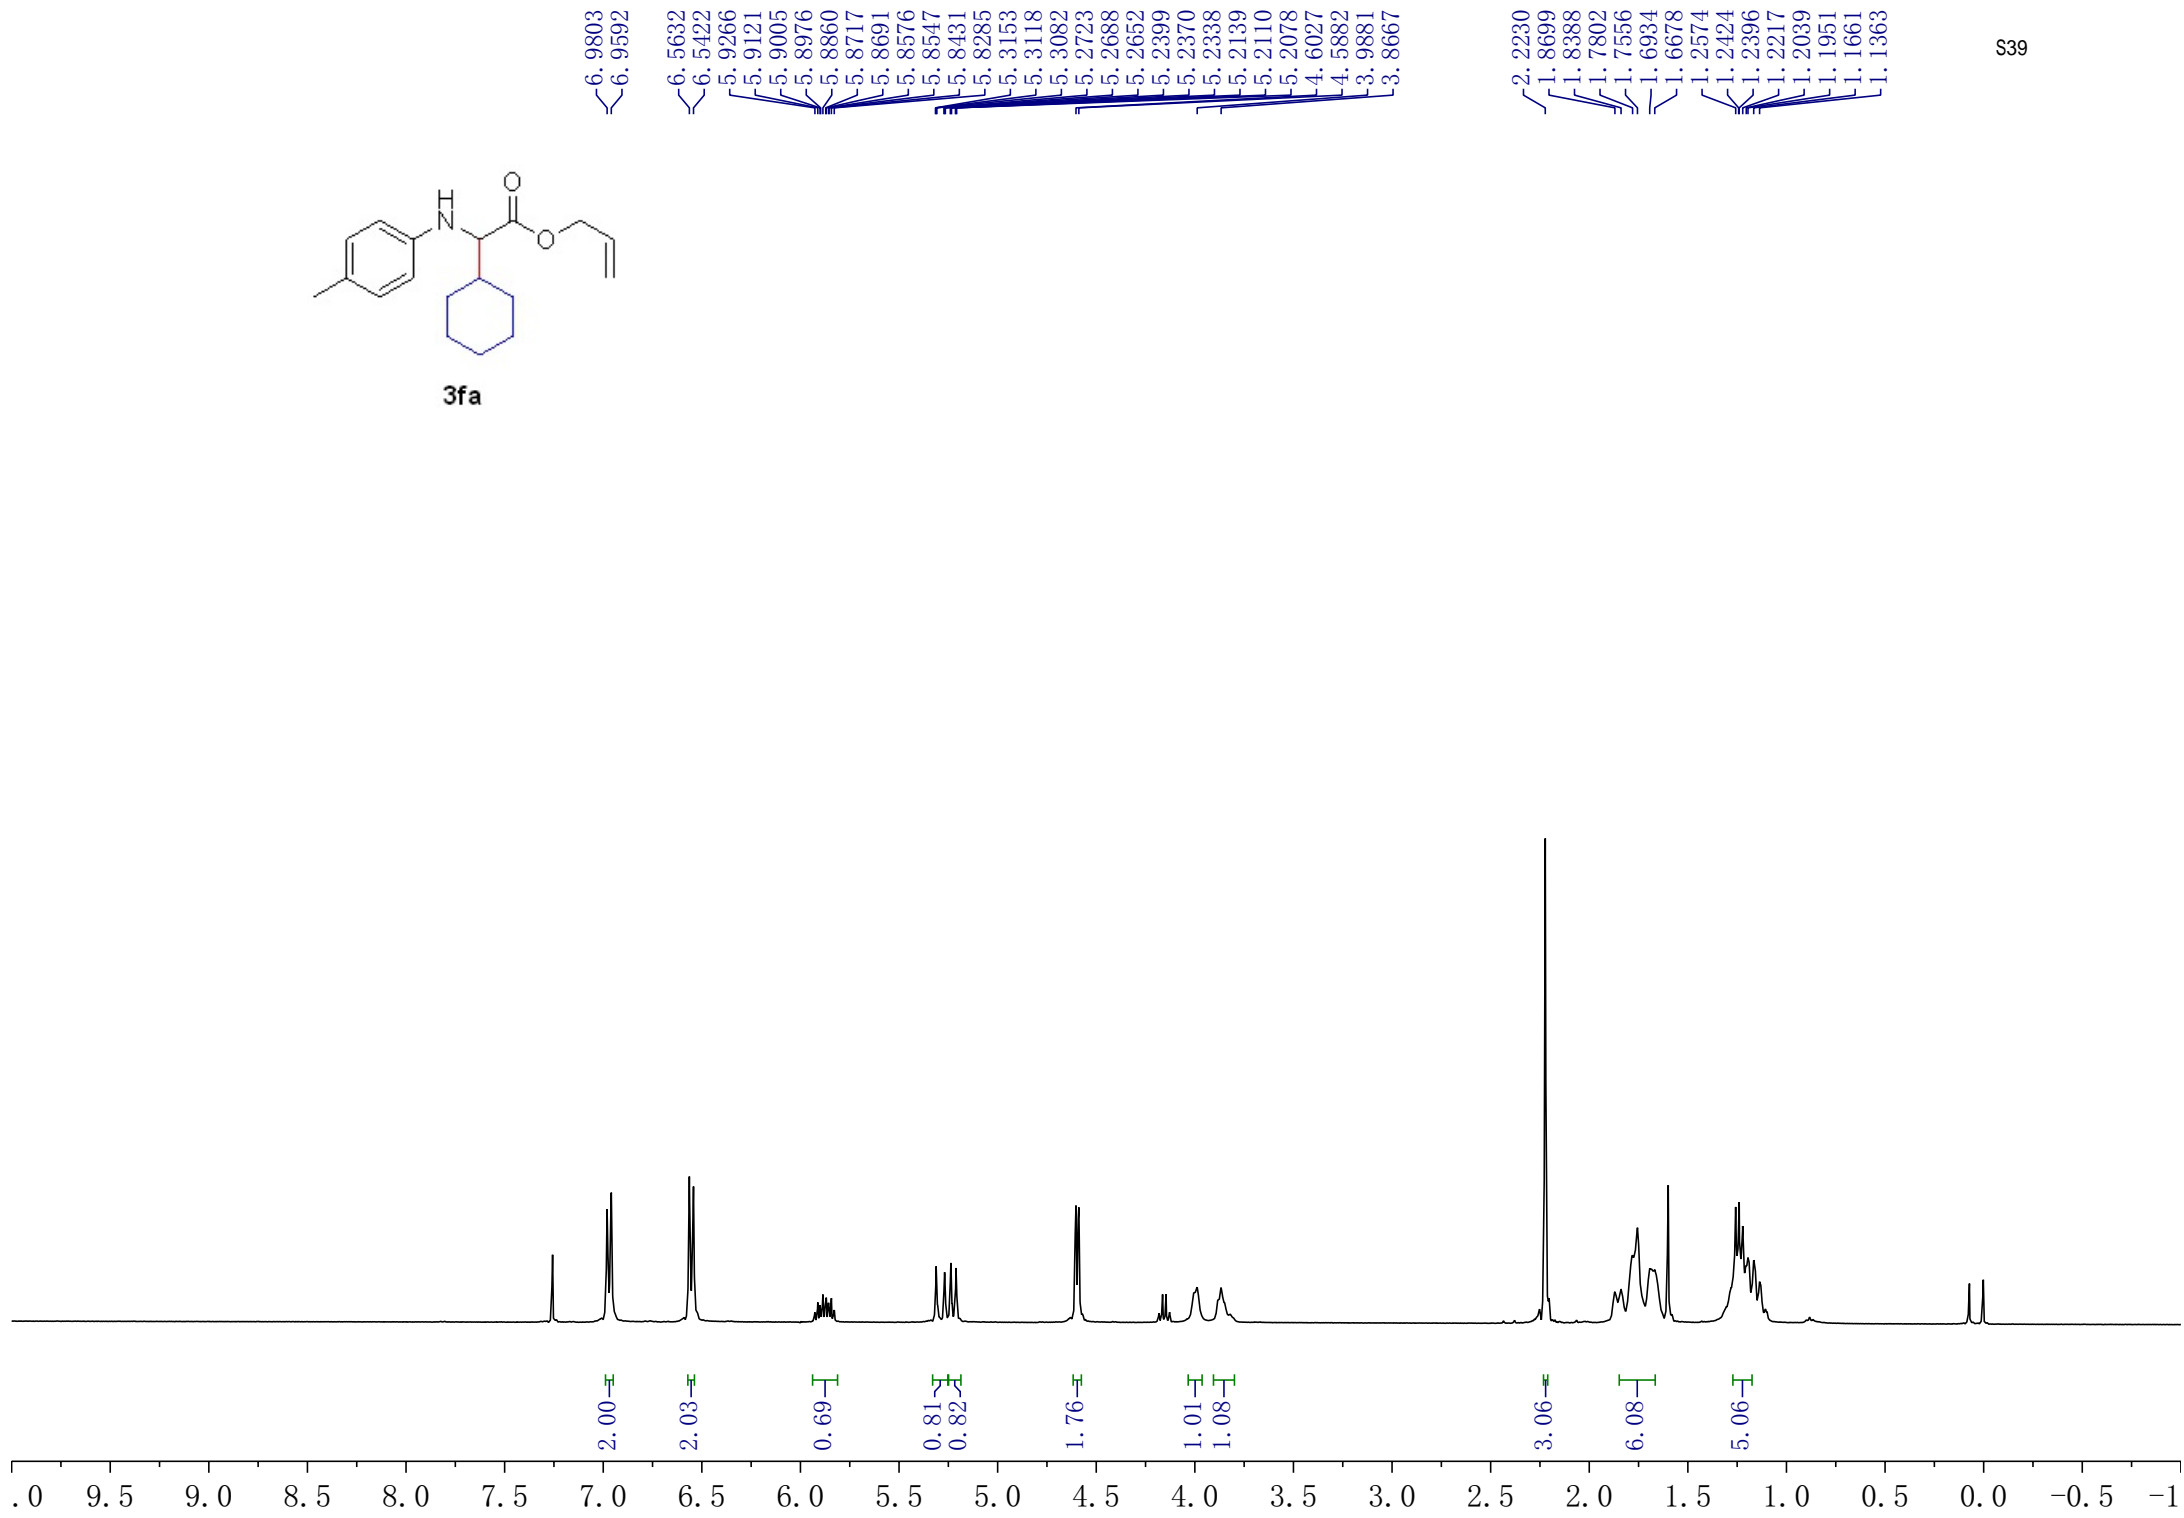

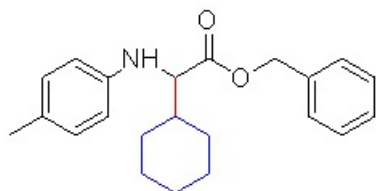

3ga

7.3691  
7.3665  
7.3649  
7.3614  
7.3547  
7.3514  
7.3389  
7.3154  
7.3095  
7.2966  
7.2921  
7.0049  
6.9849  
6.5938  
6.5729

5.1571

4.0510  
4.0283  
3.9457  
3.9309  
3.9074

2.2644  
1.8735  
1.8393  
1.7895  
1.7627  
1.6998  
1.6697  
1.6647  
1.2906  
1.2728  
1.2549  
1.2408  
1.2275  
1.2043  
1.1742  
1.1436

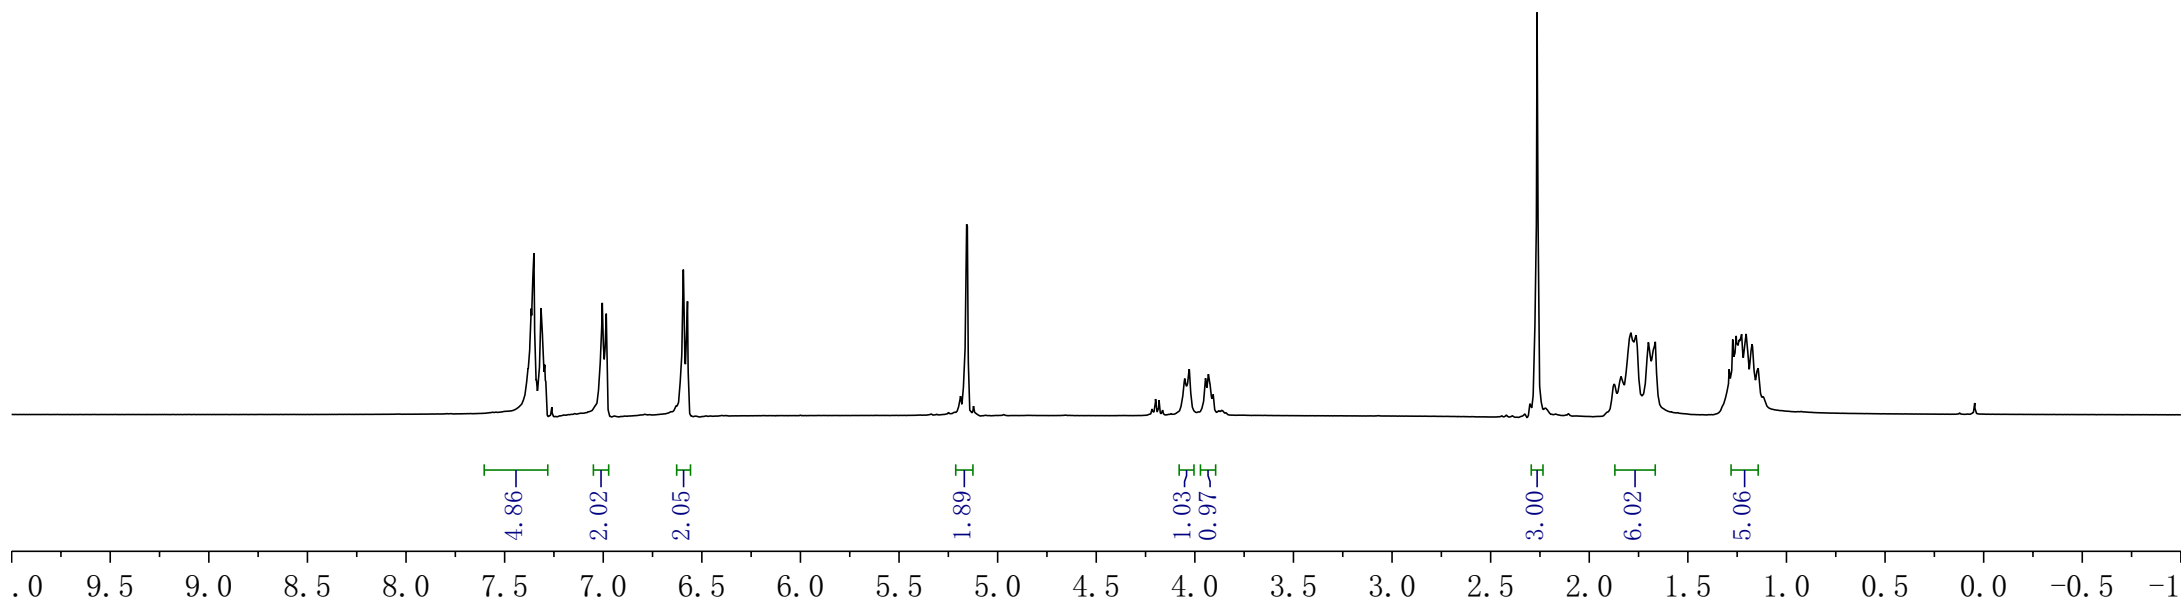



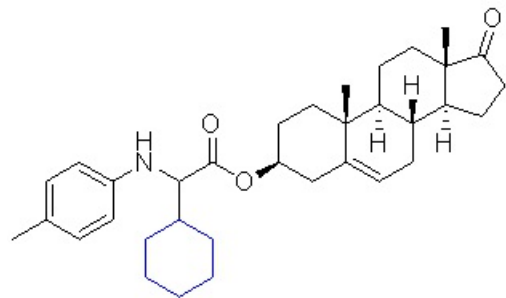

3ha

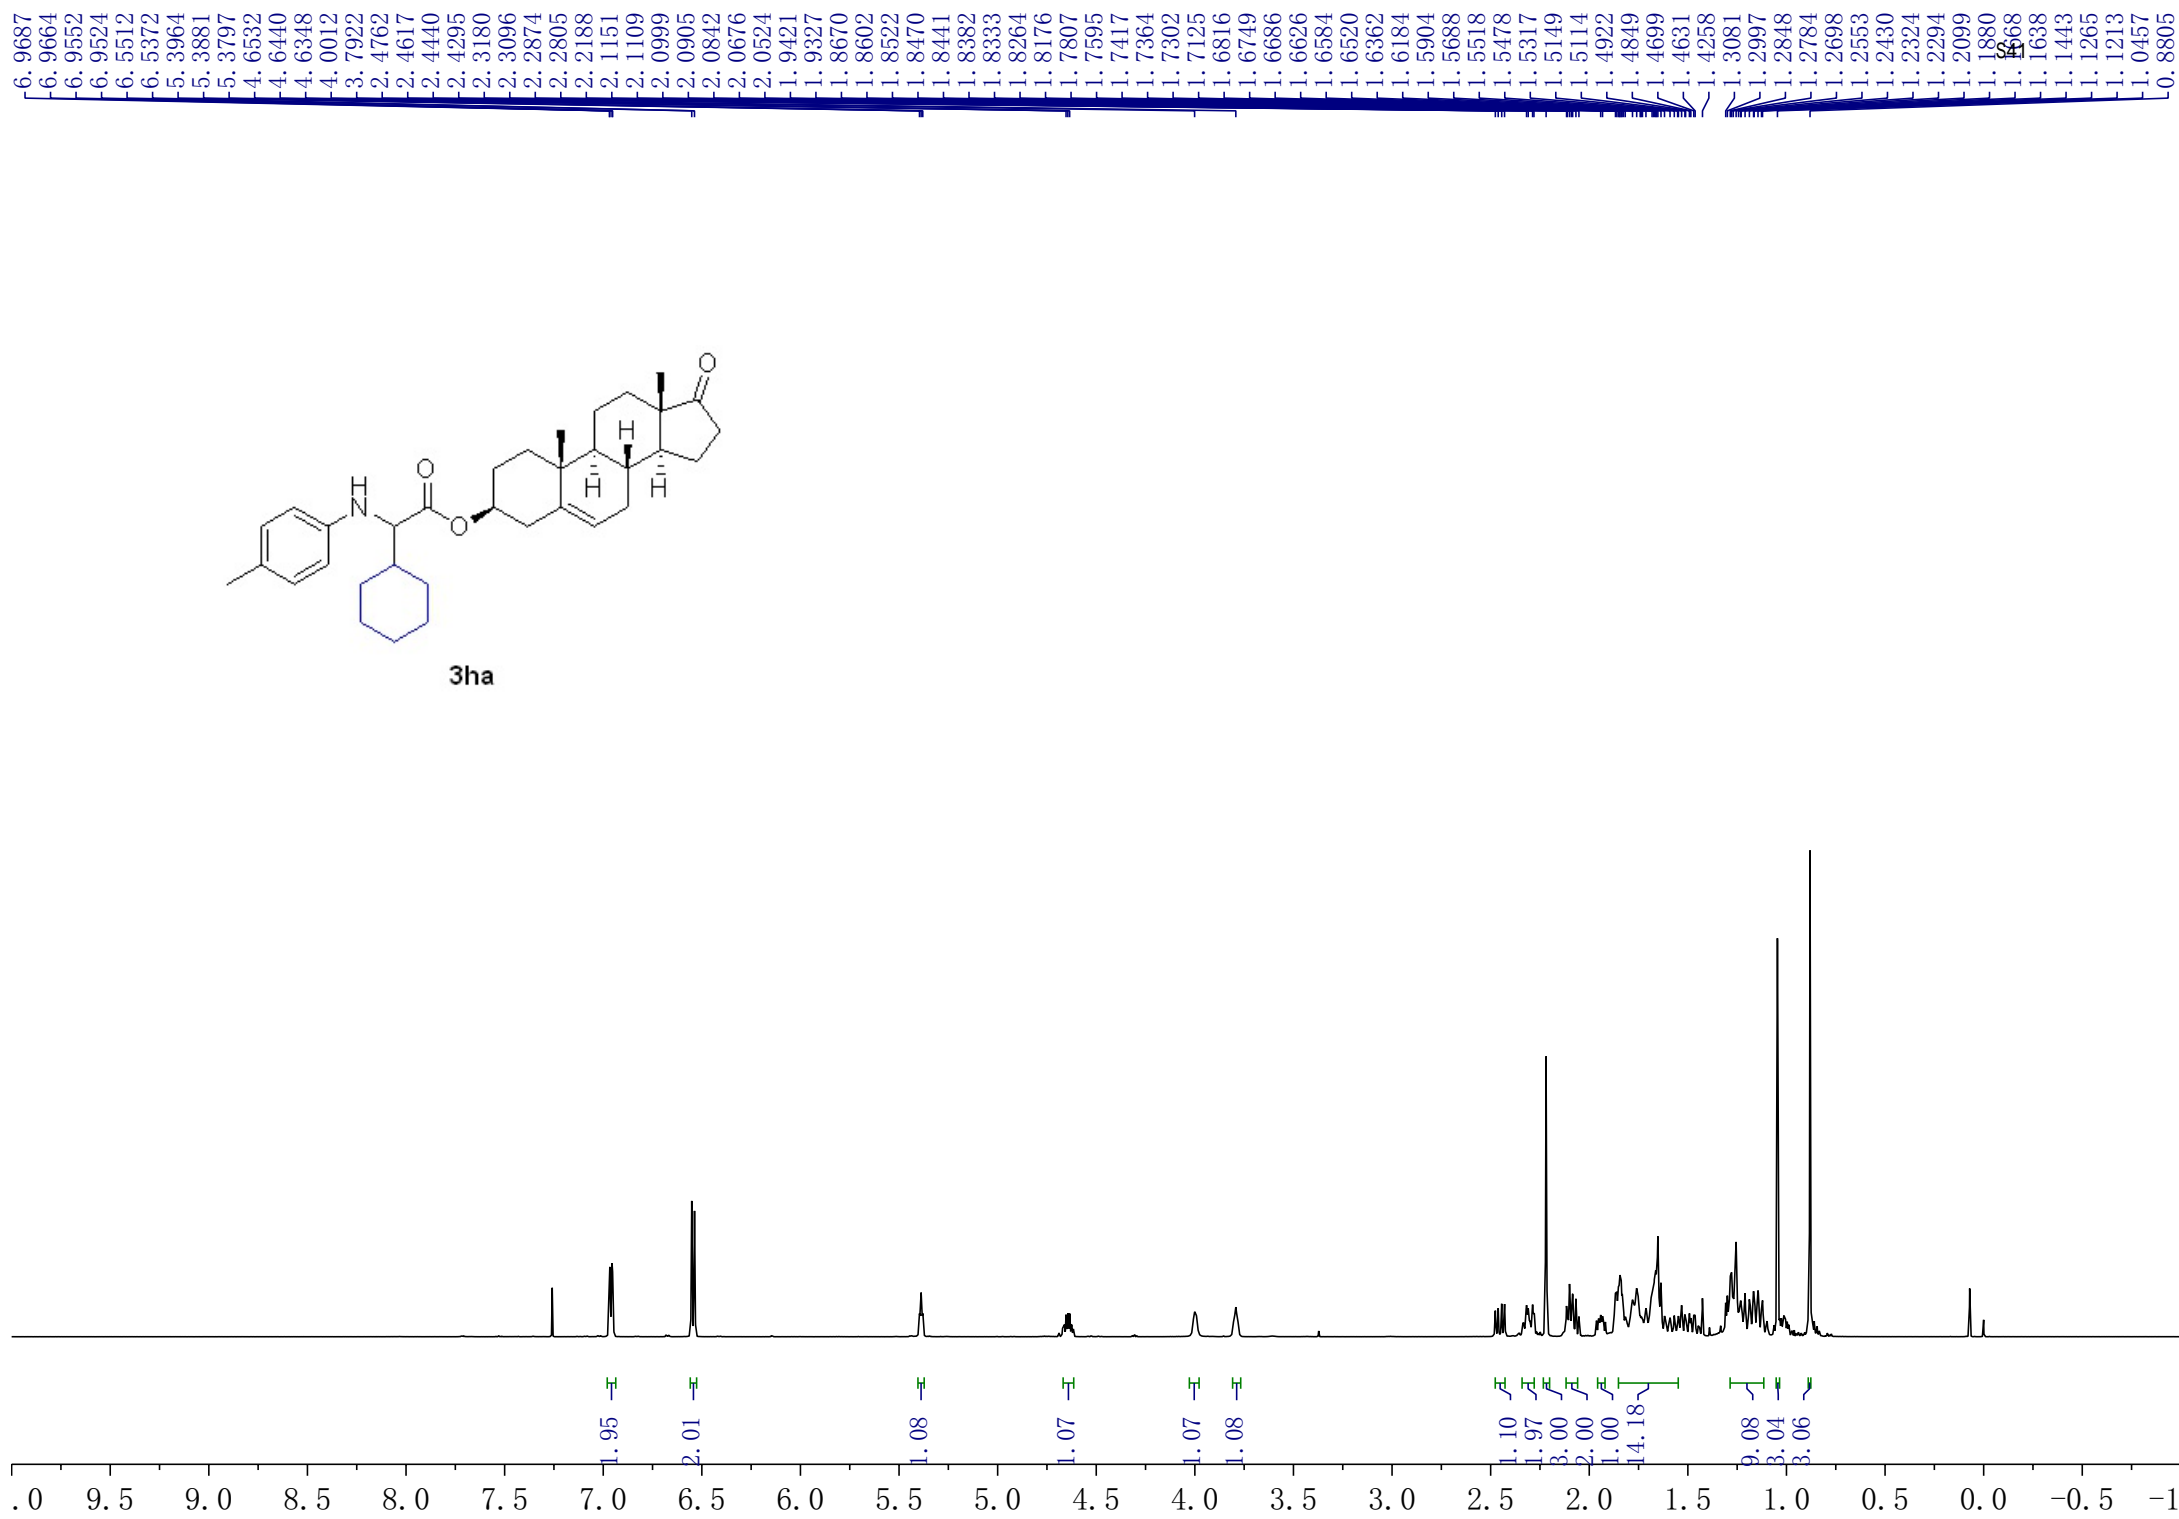

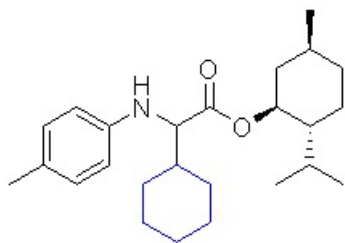

3ia

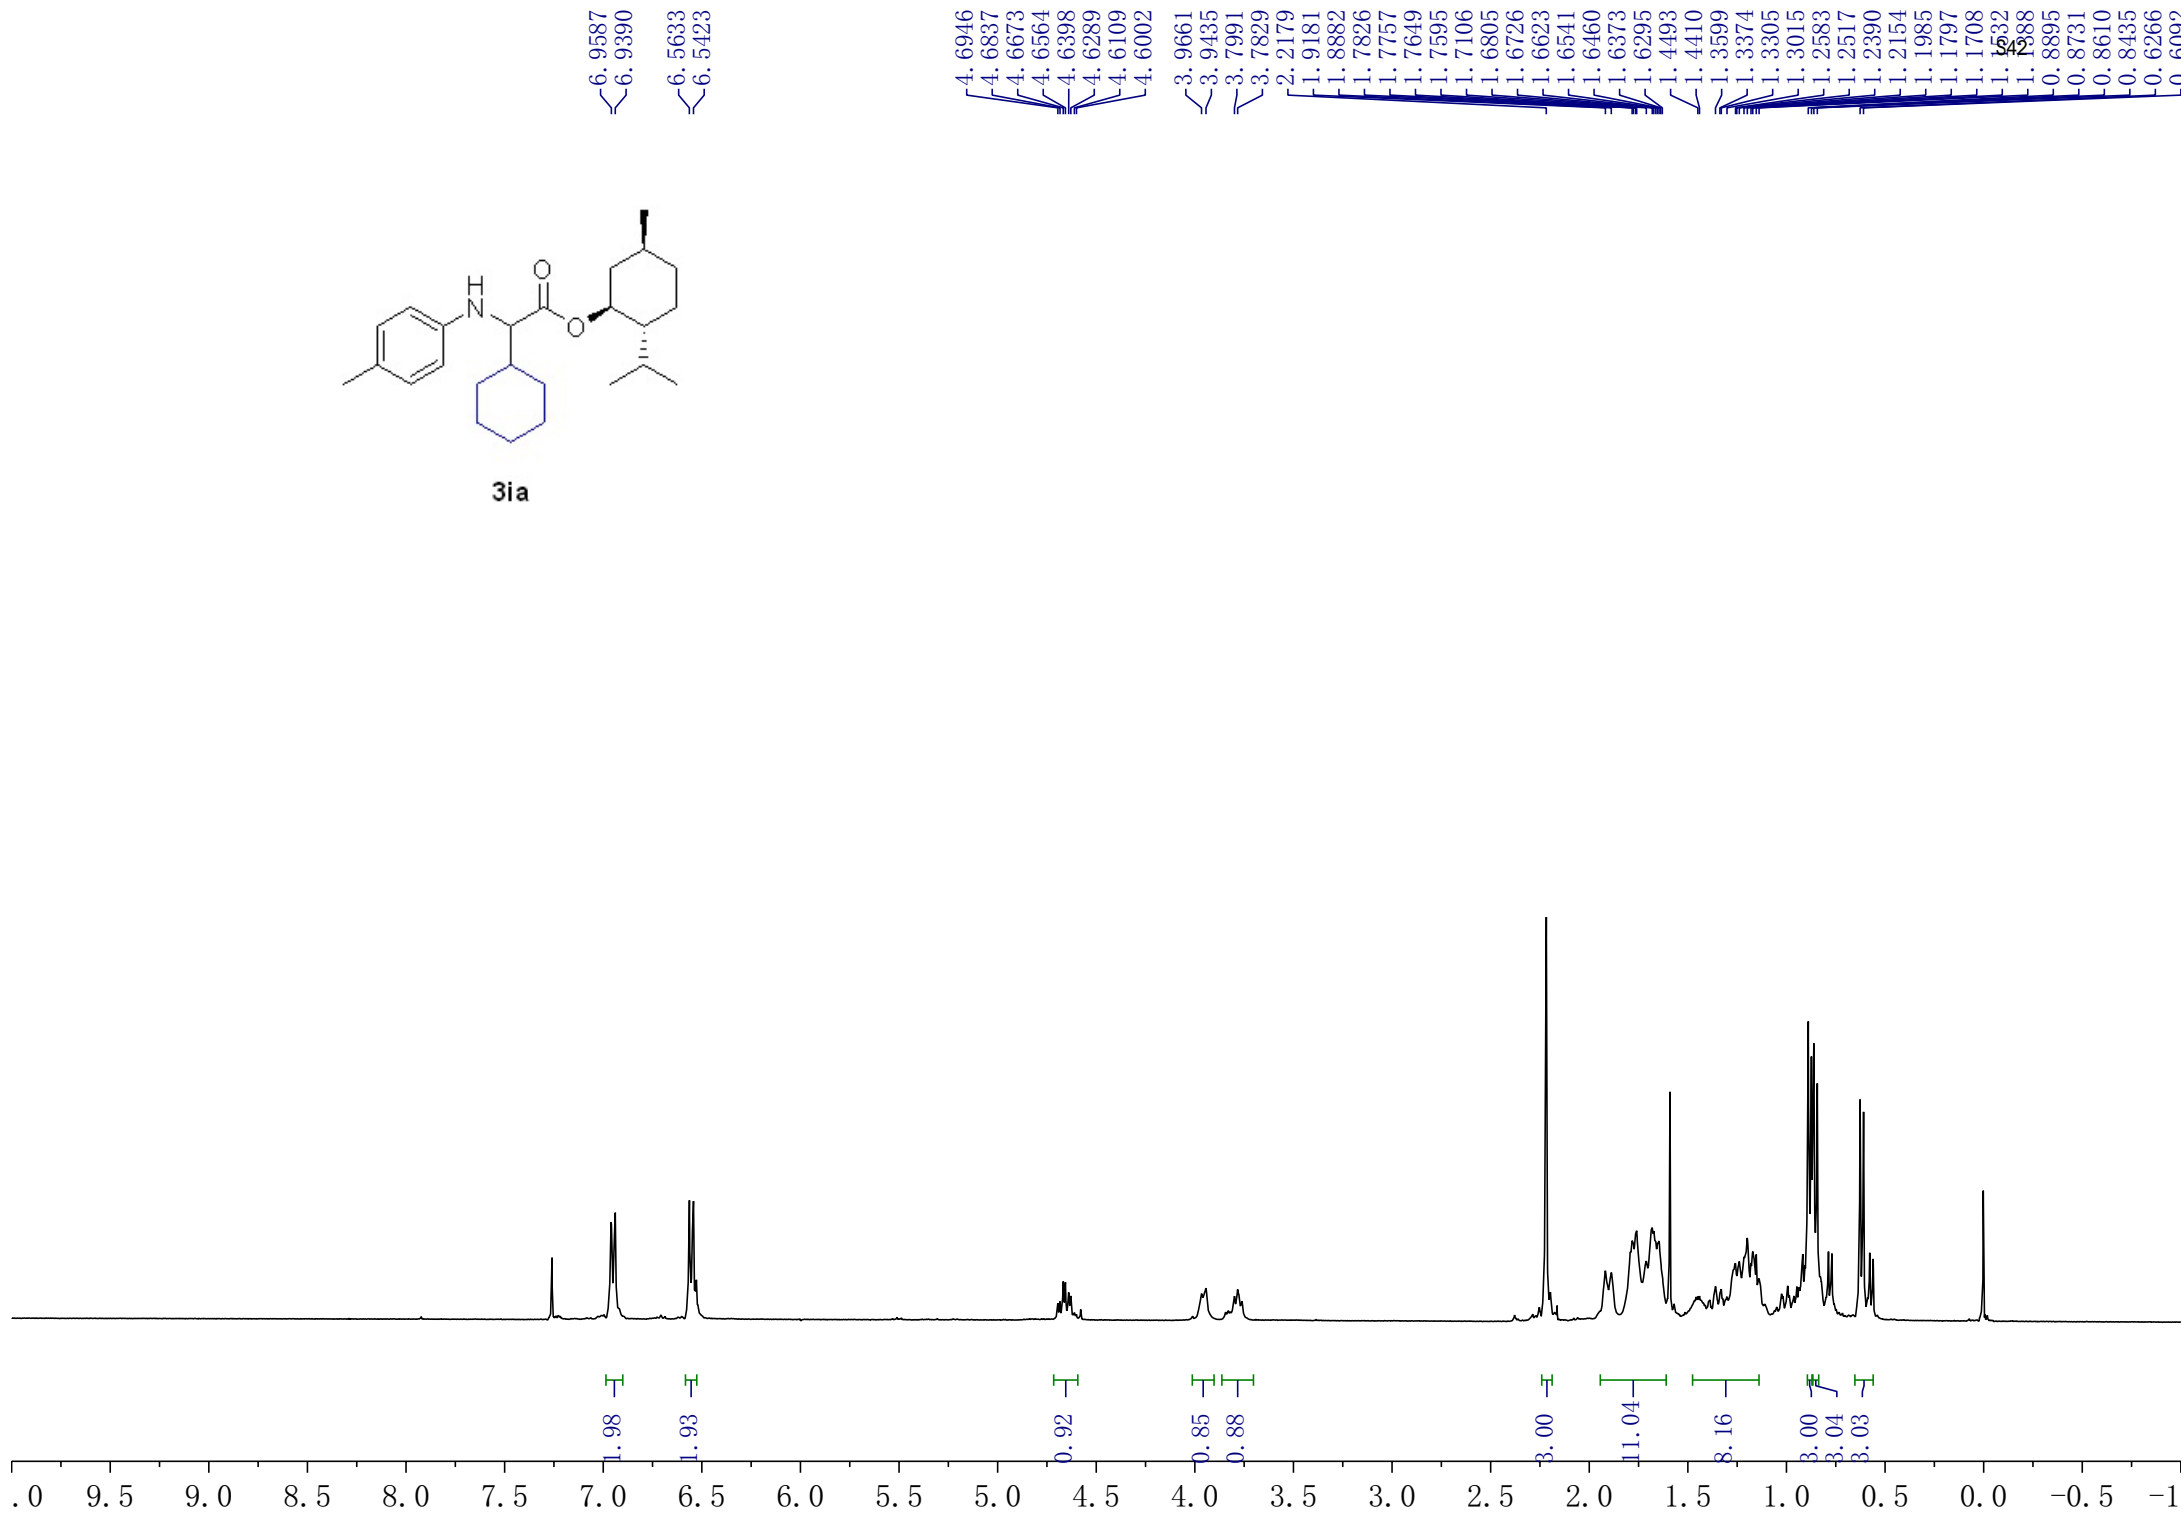

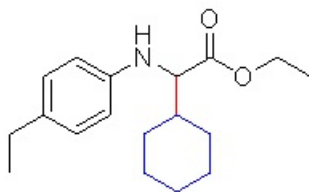

3ja

7.0094  
6.9881

6.5841  
6.5629

4.1888  
4.1710  
4.1532  
4.1353  
4.0349  
3.8363  
3.8211

2.5573  
2.5383  
2.5194  
2.5004  
1.8707  
1.8391  
1.7865  
1.7793  
1.7573  
1.7041  
1.7002  
1.6868

1.3525  
1.3335  
1.3146  
1.3077  
1.2990  
1.2907  
1.2839  
1.2631  
1.2452  
1.2274  
1.1967  
1.1777  
1.1587  
1.1498  
1.1392  
1.1312  
1.1091  
1.1005  
1.0816

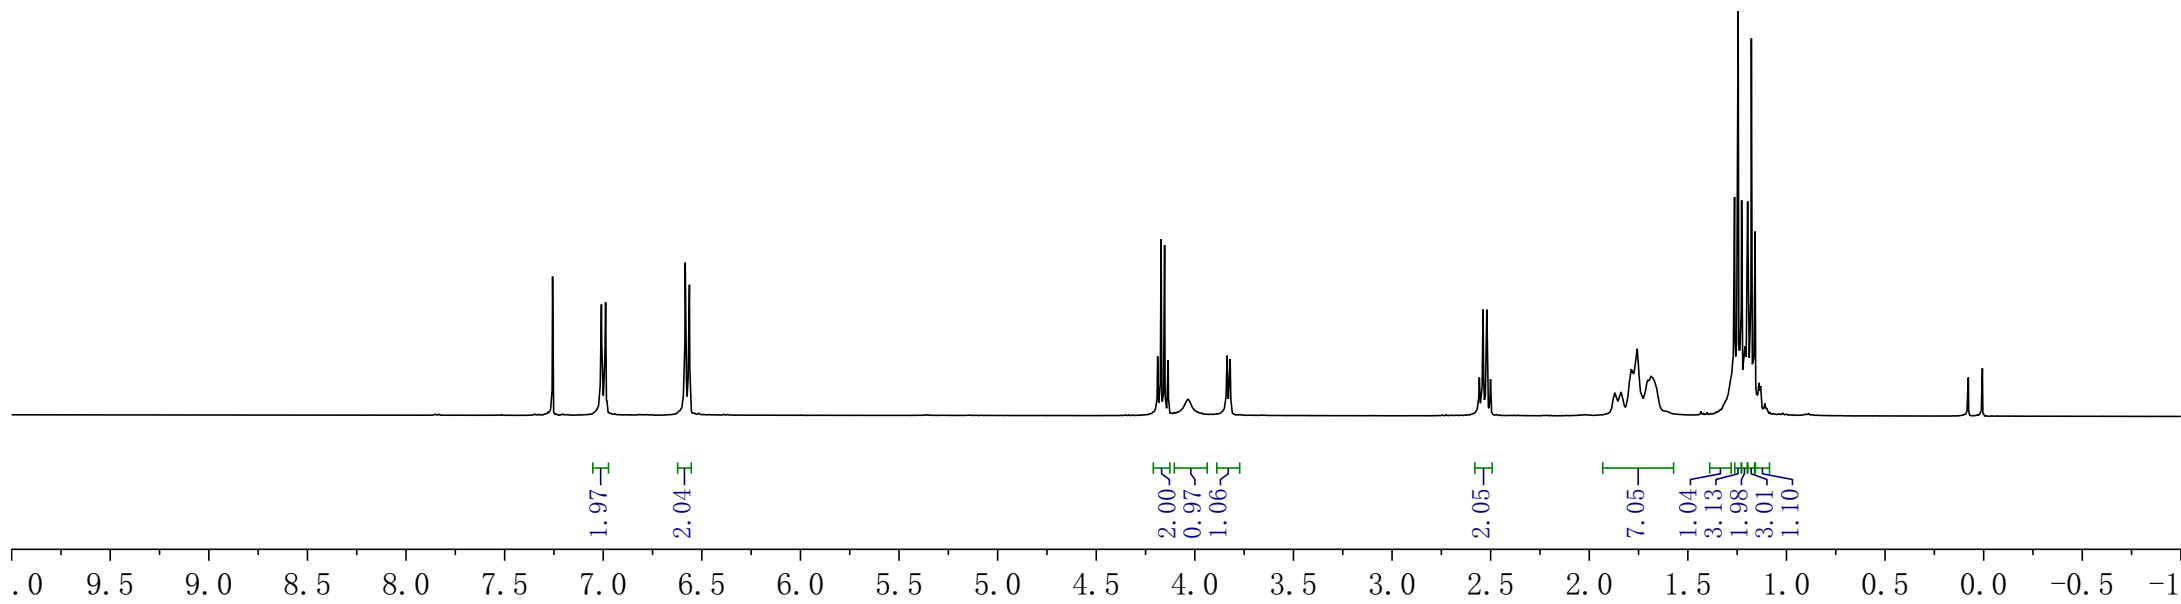

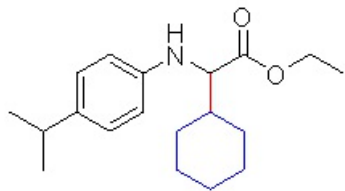

3ka

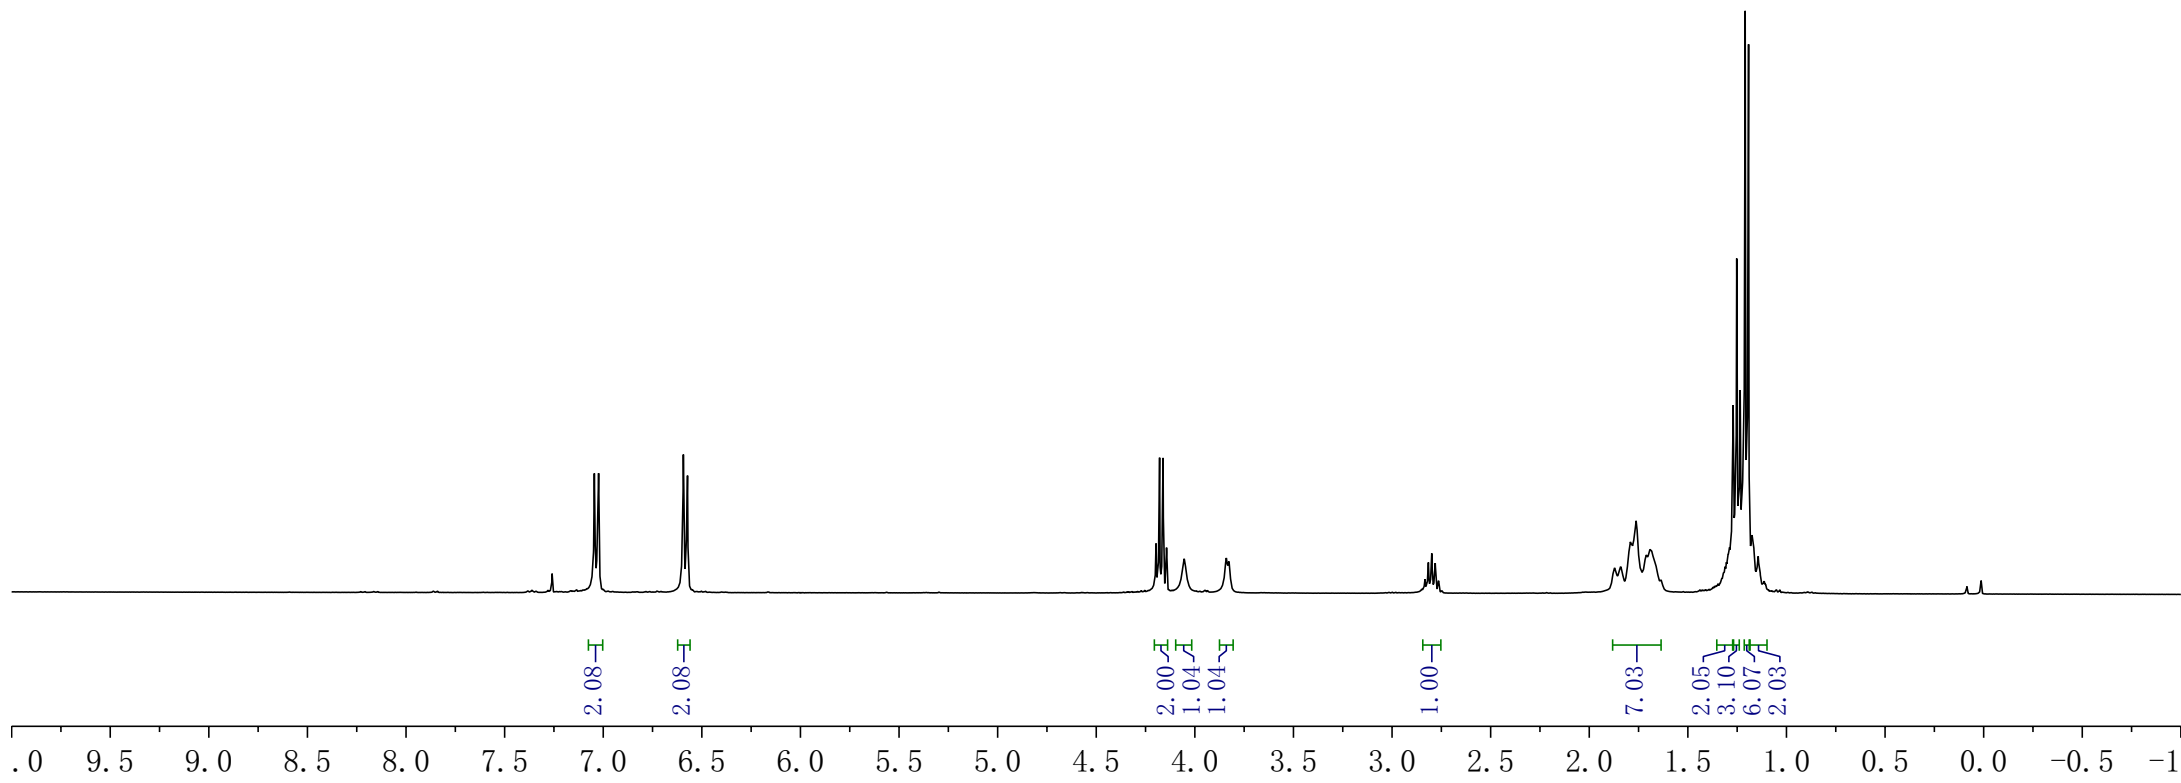

7.0451  
7.0238

6.5937  
6.5725

4.1968  
4.1790  
4.1611  
4.1433  
4.0536  
3.8404  
3.8267

2.8498  
2.8330  
2.8158  
2.7985  
2.7813  
2.7640  
2.7473

1.8721  
1.8410  
1.7914  
1.7841  
1.7623  
1.7108  
1.6913  
1.6353

1.3558  
1.3472  
1.3272  
1.3176  
1.3104  
1.3047  
1.2993  
1.2883

1.2701  
1.2523  
1.2345  
1.2095  
1.1922  
1.1744  
1.1684  
1.1434

1.1365  
1.1131  
1.1056

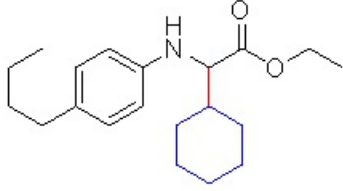

3la

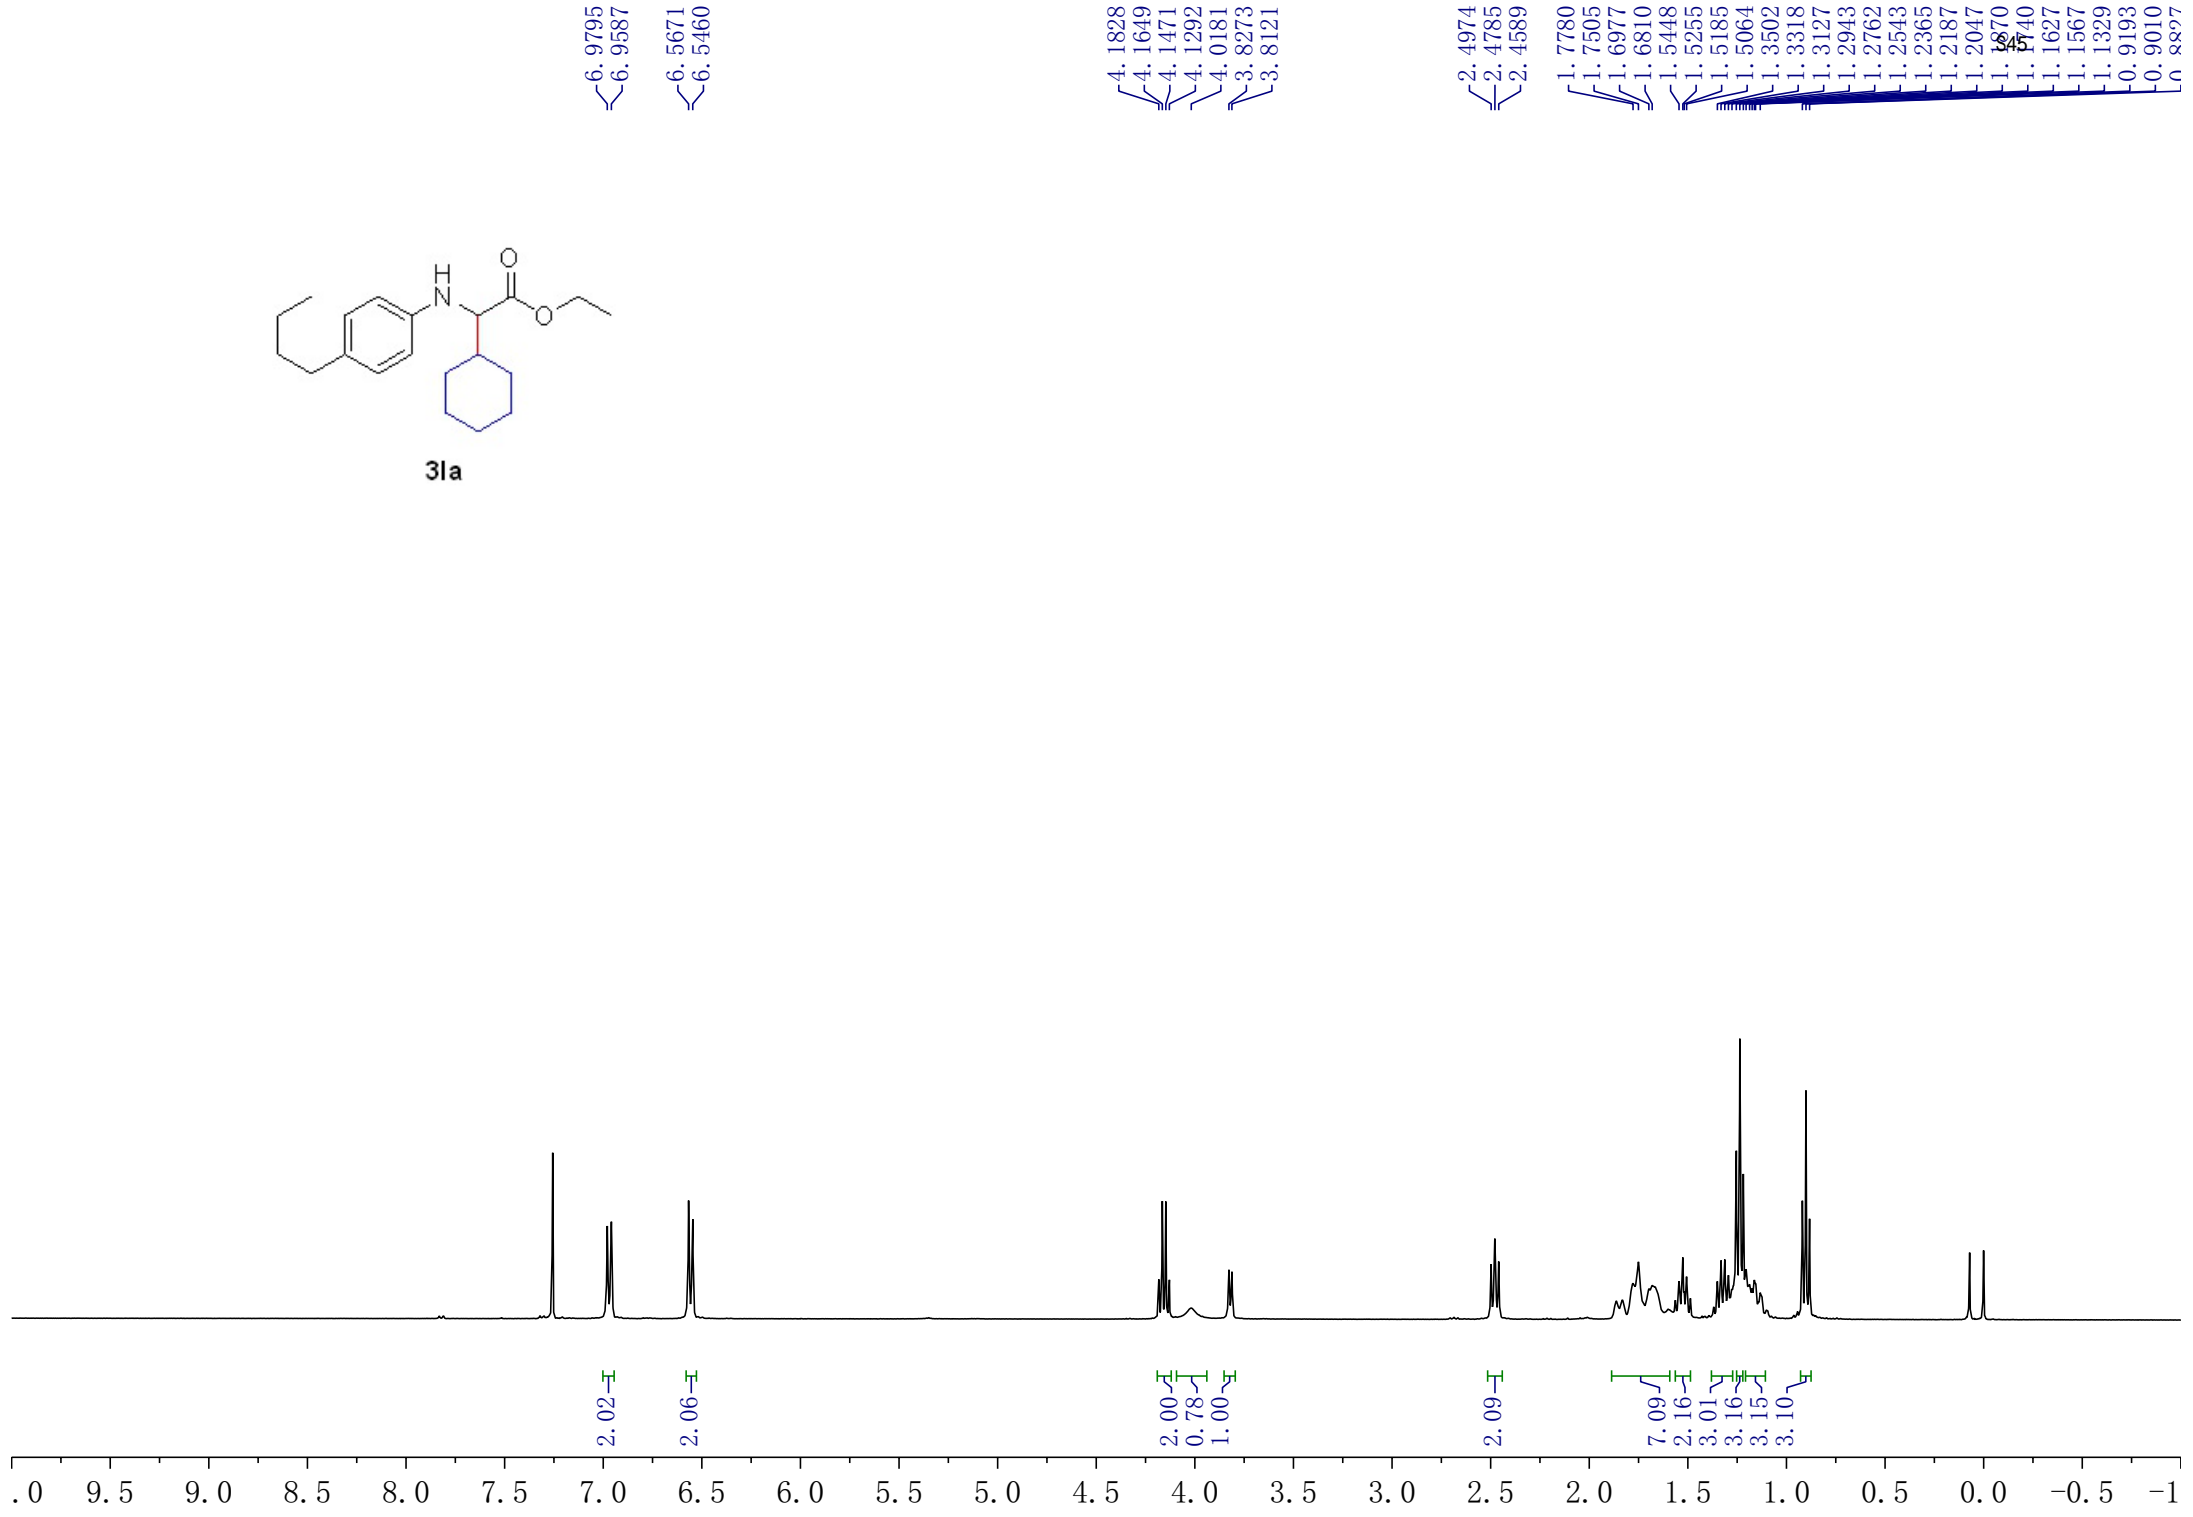

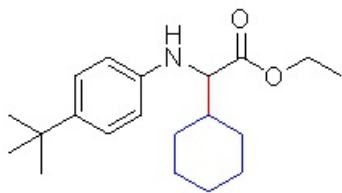

3ma

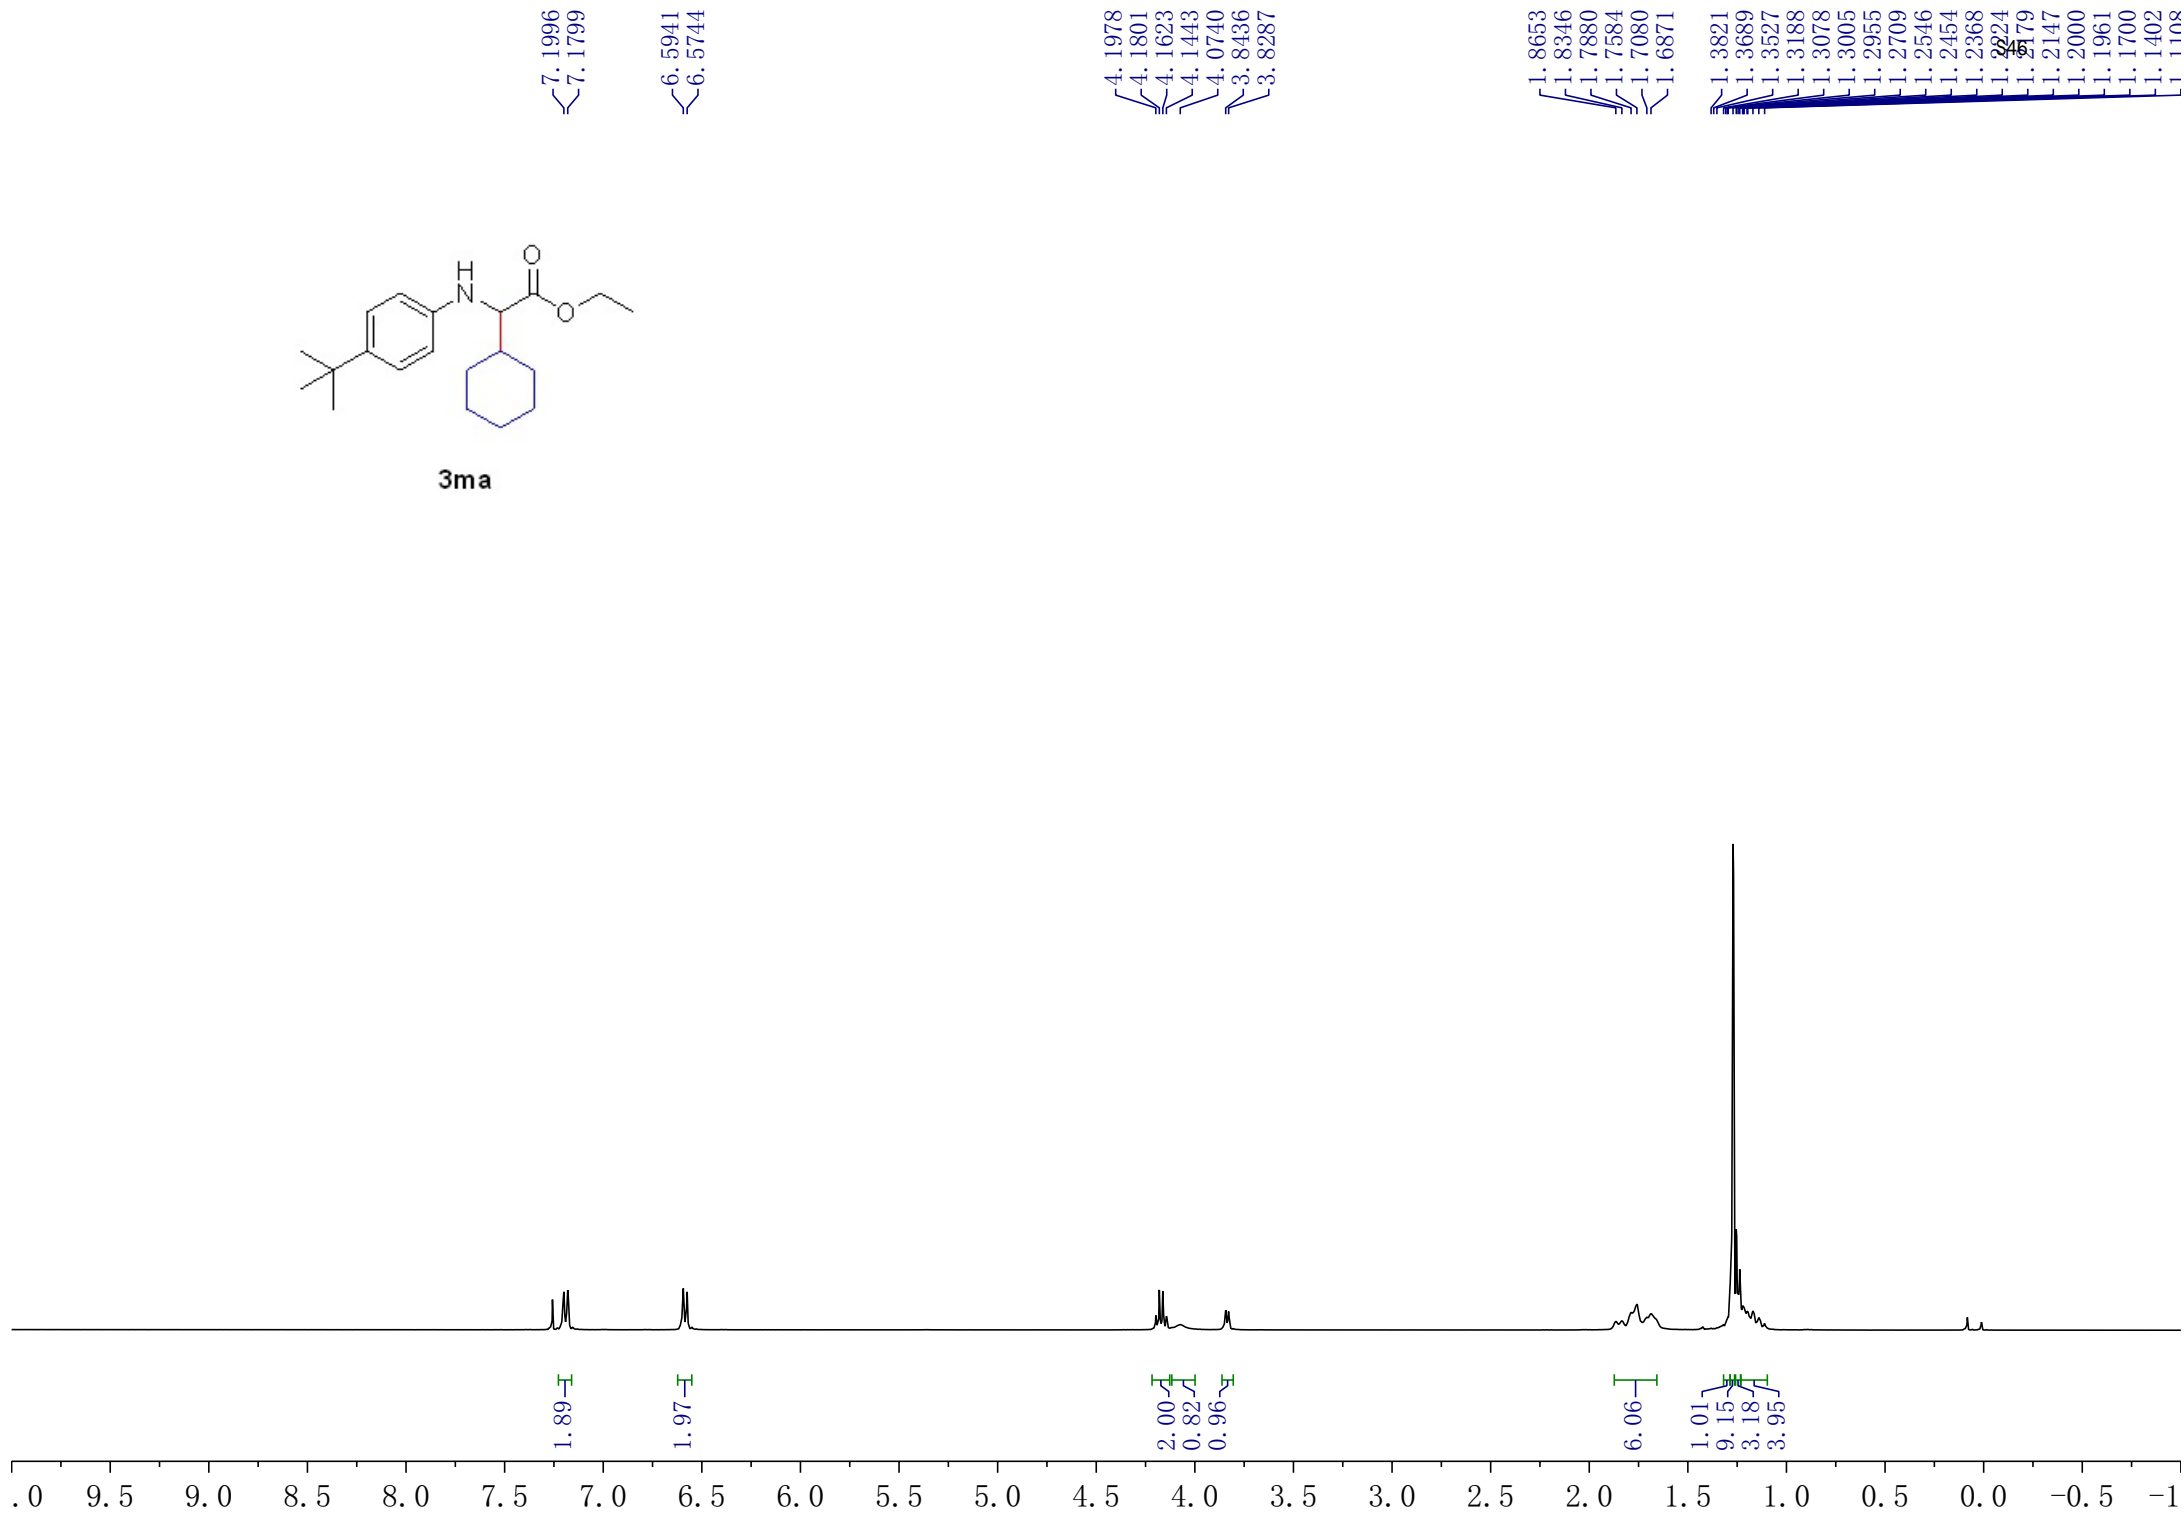

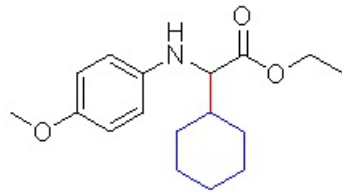

3na

6.7613  
6.7395  
6.6083  
6.5865

4.1709  
4.1531  
4.1353  
4.1175  
3.8679  
3.7632  
3.7483  
3.7247

1.9736  
1.8731  
1.8438  
1.7822  
1.7747  
1.7519  
1.7210  
1.6865  
1.6584  
1.3197  
1.3105  
1.3021  
1.2804  
1.2703  
1.2635  
1.2422  
1.2243  
1.2065  
1.1677  
1.1590  
1.1383  
1.1289  
1.1213  
1.0988  
1.0905

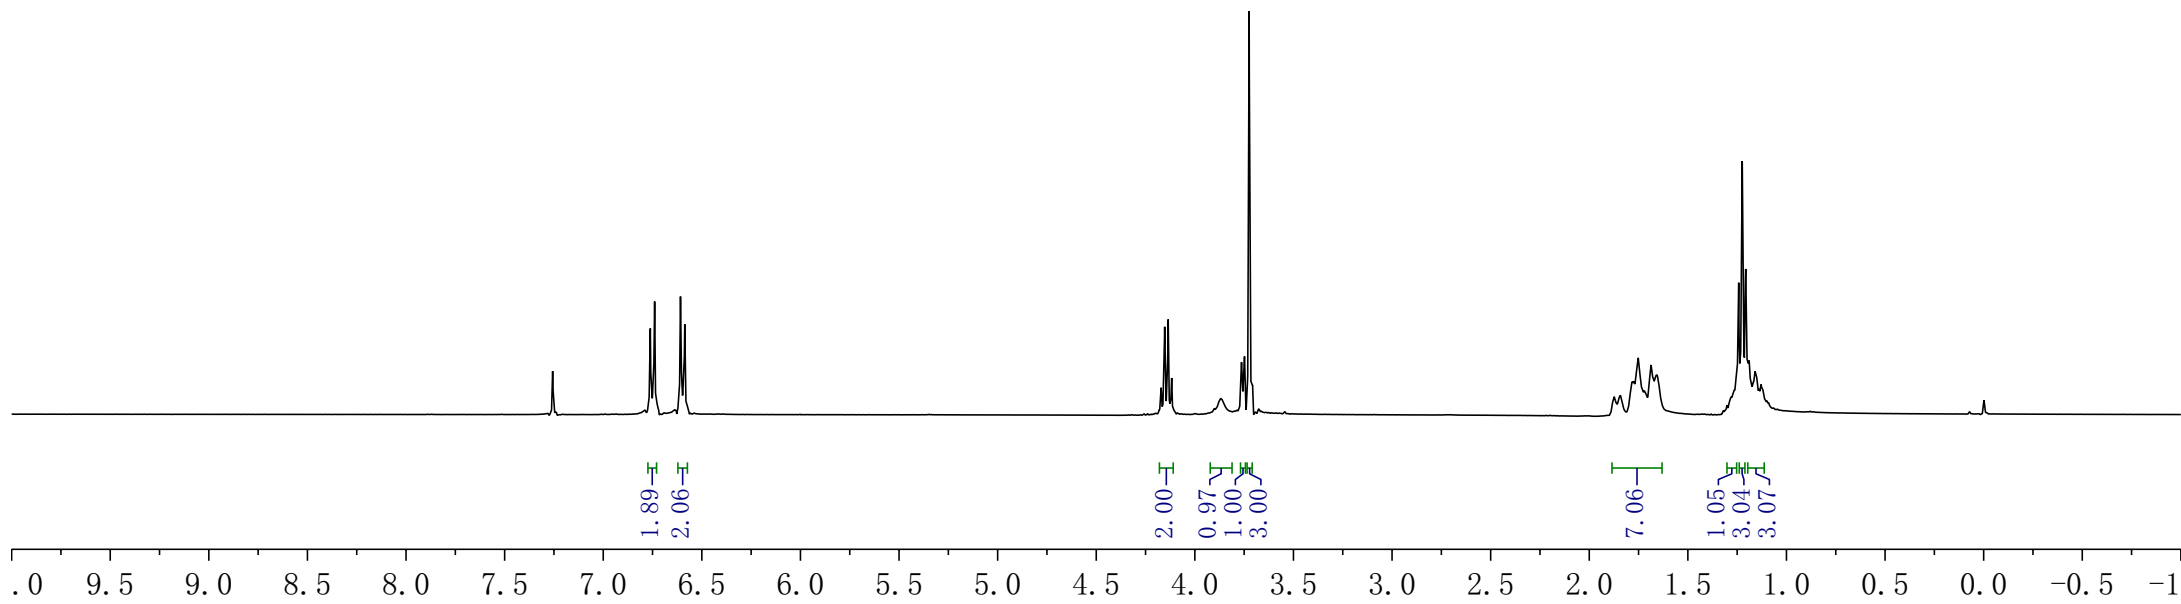

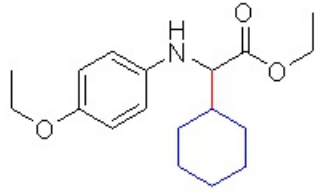

30a

6.7549  
6.7325  
6.5942  
6.5718

4.1672  
4.1510  
4.1331  
4.1152  
3.9640  
3.9465  
3.9290  
3.9116  
3.8466  
3.7570  
3.7424

1.8720  
1.8403  
1.7813  
1.7734  
1.7506  
1.7242  
1.7165  
1.6842  
1.6555

1.3731  
1.3556  
1.3382  
1.3174  
1.2998  
1.2851  
1.2786  
1.2685  
1.2622  
1.2395  
1.2216  
1.2038  
1.1846  
1.1784  
1.1659  
1.1573  
1.1359  
1.1265  
1.1181

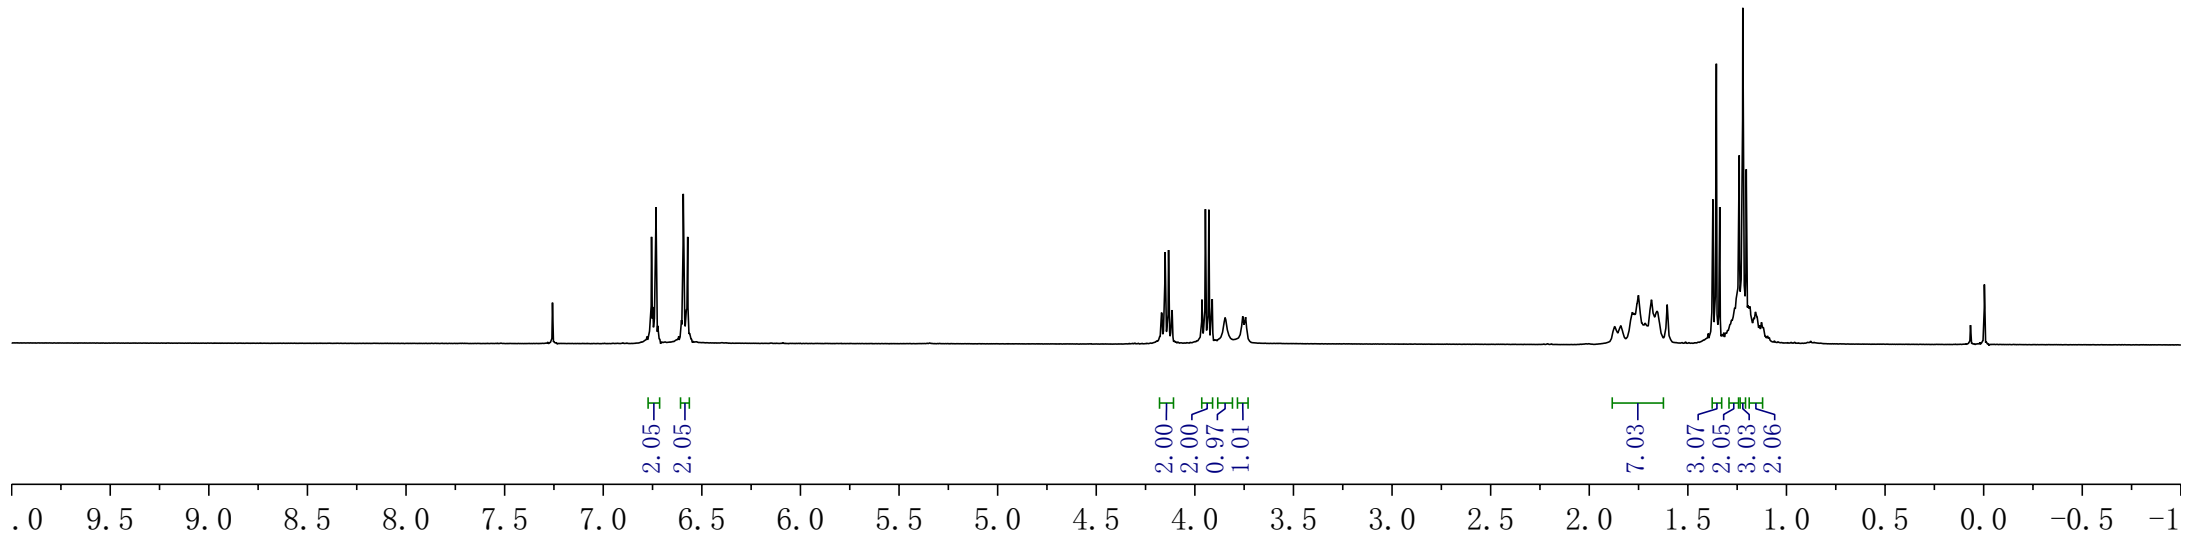



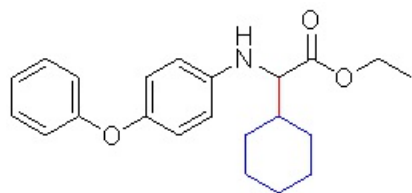

3pa

7.2910  
7.2860  
7.2723  
7.2695  
7.2574  
7.2510  
7.0234  
7.0214  
6.9866  
6.9845  
6.9300  
6.9088  
6.8962  
6.8741  
6.6350  
6.6128

4.2094  
4.1917  
4.1739  
4.1563  
4.0638  
3.8220  
3.8068

1.8829  
1.8546  
1.8023  
1.7961  
1.7735  
1.7395  
1.7311  
1.7065  
1.7021  
1.6941  
1.6837  
1.3215  
1.3149  
1.2985  
1.2911  
1.2837  
1.2702  
1.2524  
1.2345  
1.2128  
1.2066  
1.2029  
1.1986  
1.1843  
1.1771  
1.1538  
1.1464  
1.1235

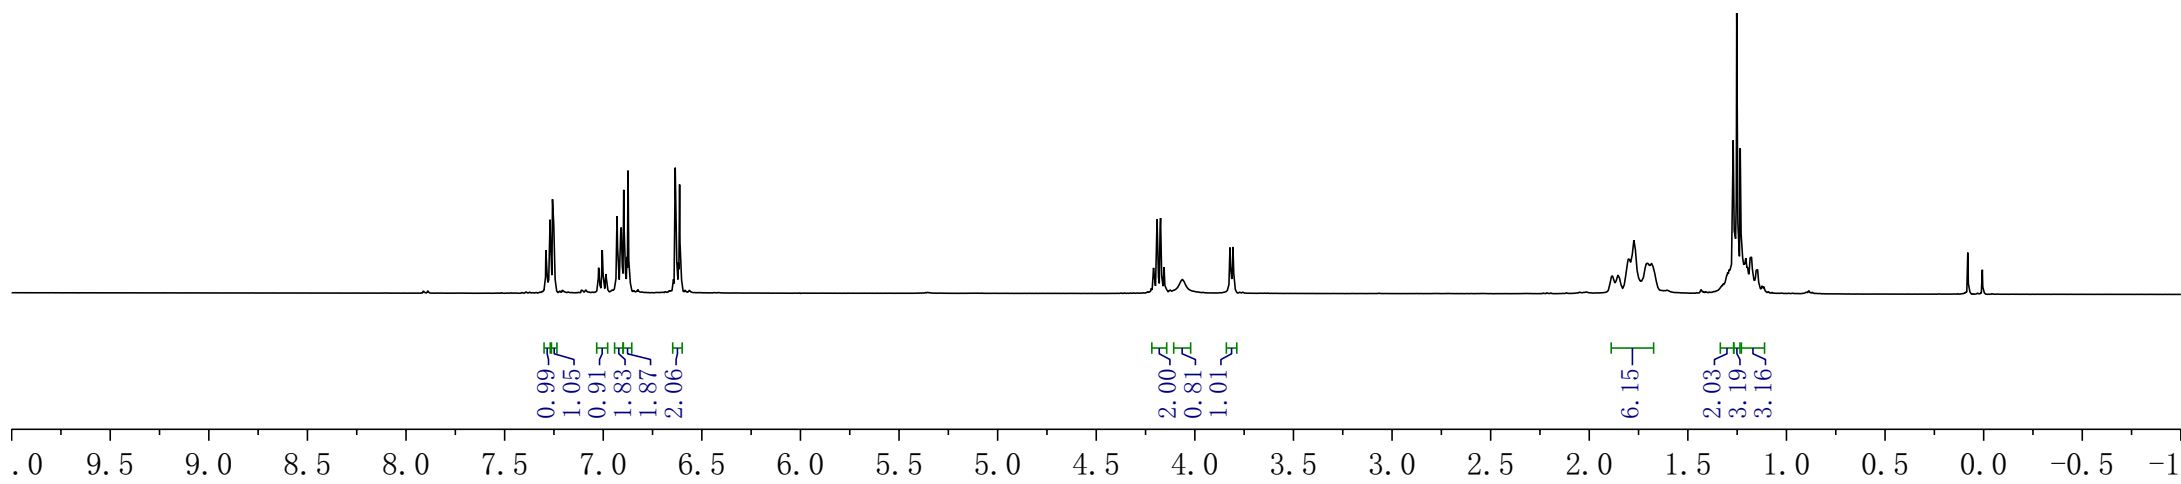

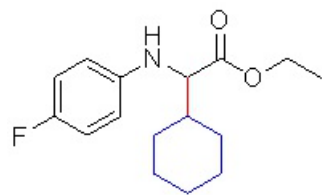

3qa

6.8822  
6.8799  
6.8597  
6.8386  
6.5733  
6.5645  
6.5508  
6.5419

4.1806  
4.1628  
4.1450  
4.1273  
3.9926  
3.7691  
3.7539

1.8588  
1.8274  
1.7805  
1.7537  
1.7287  
1.6878  
1.6570  
1.3102  
1.2896  
1.2728  
1.2635  
1.2480  
1.2302  
1.2123  
1.1751  
1.1470  
1.1253  
1.1167  
1.0949

50

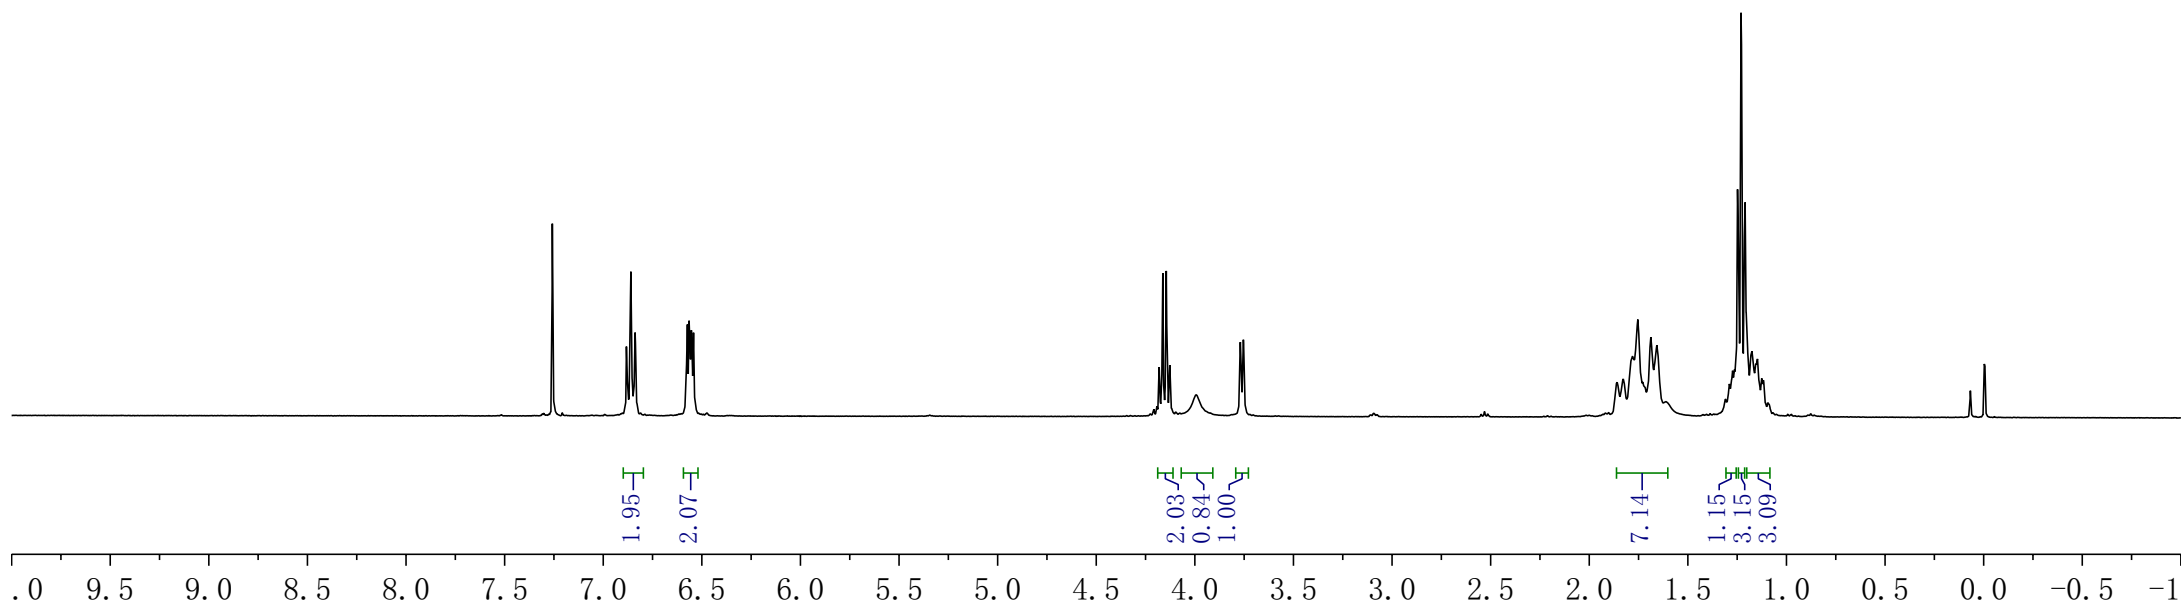

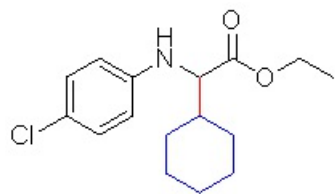

3ra

7.1090  
7.0868

6.5520  
6.5298

4.1935  
4.1756  
4.1577  
4.1400  
4.1189  
3.8164  
3.8011  
3.7932  
3.7779

1.8432  
1.8042  
1.7837  
1.7560  
1.7282  
1.7200  
1.7128  
1.6895  
1.6600  
1.2621  
1.2443  
1.2264  
1.2120  
1.1878  
1.1829  
1.1544  
1.1333  
1.1245  
1.1174  
1.1020  
1.0948

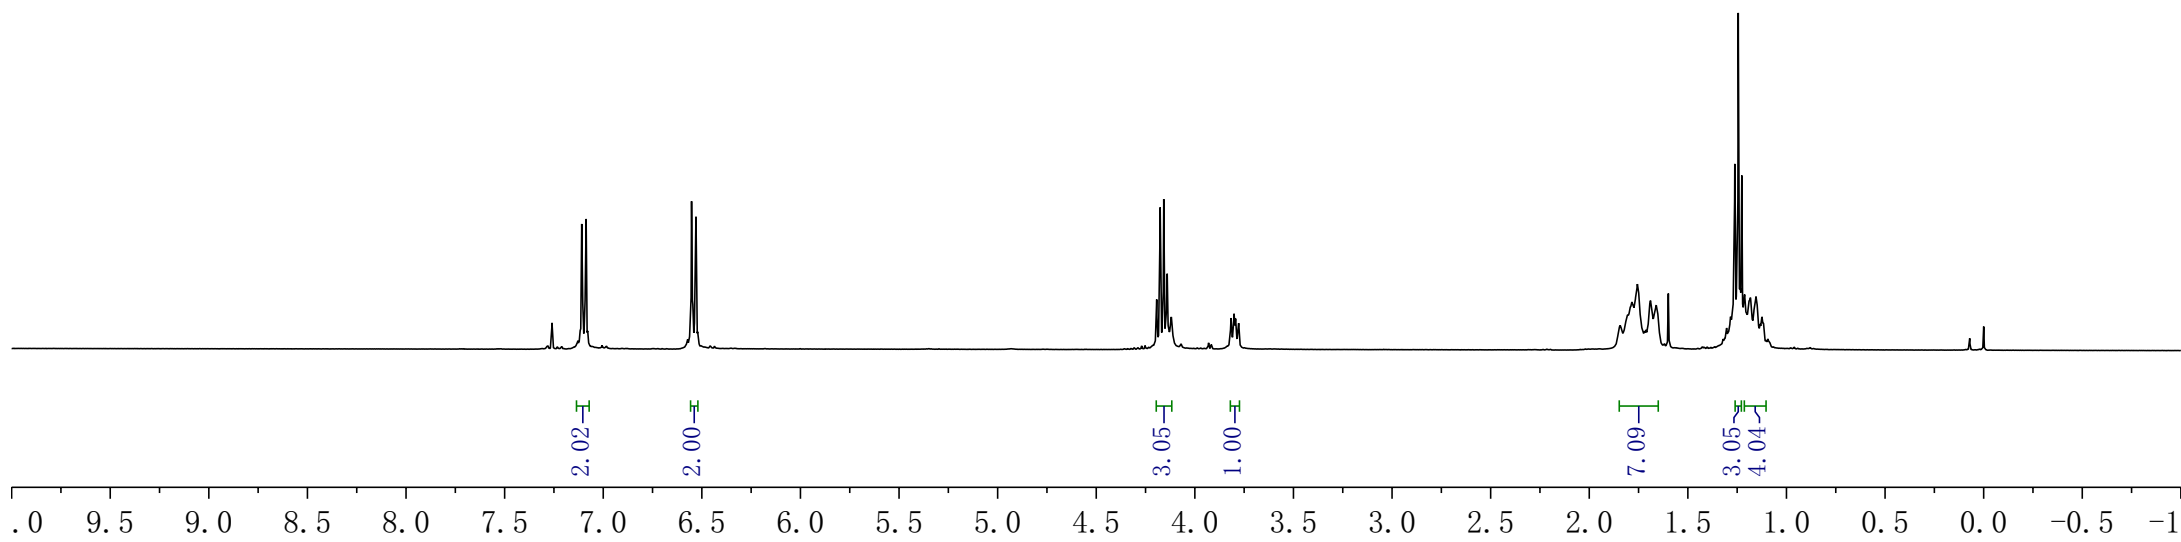

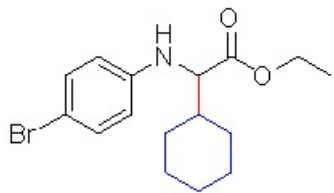

3sa

7.2393  
7.2194

6.5060  
6.4856

4.1947  
4.1926  
4.1767  
4.1746  
4.1589  
4.1568  
4.1410  
3.8131  
3.7968

1.8378  
1.7918  
1.7829  
1.7546  
1.6887  
1.6579  
1.2645  
1.2467  
1.2288  
1.2107  
1.1933  
1.1822  
1.1525  
1.1454  
1.1306  
1.1216  
1.1149  
1.0914  
0.952

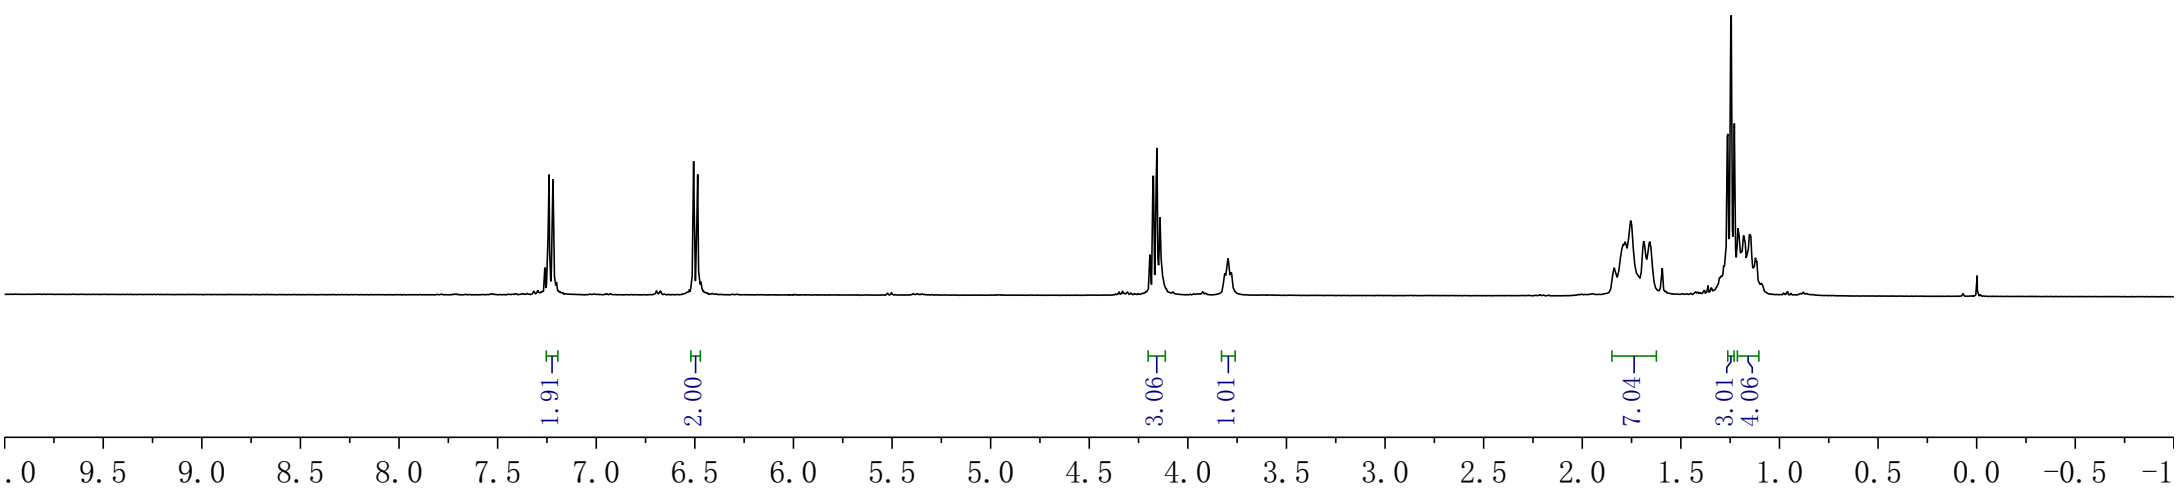

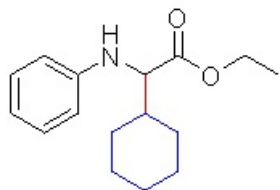

3ta

7.1801  
7.1616  
7.1588  
7.1403  
6.7375  
6.7352  
6.7328  
6.7169  
6.7010  
6.6985  
6.6960  
6.6378  
6.6354  
6.6163  
6.6140

4.1943  
4.1764  
4.1586  
4.1408  
4.1240  
3.8805  
3.8648

1.8716  
1.8405  
1.7926  
1.7844  
1.7808  
1.7713  
1.7637  
1.7360  
1.7284  
1.7114  
1.6899  
1.6823  
1.6622  
1.6076  
1.3233  
1.3153  
1.3038  
1.2913  
1.2835  
1.2629  
1.2450  
1.2272  
1.2100  
1.2051  
1.1738  
1.1407  
1.1350  
1.1098

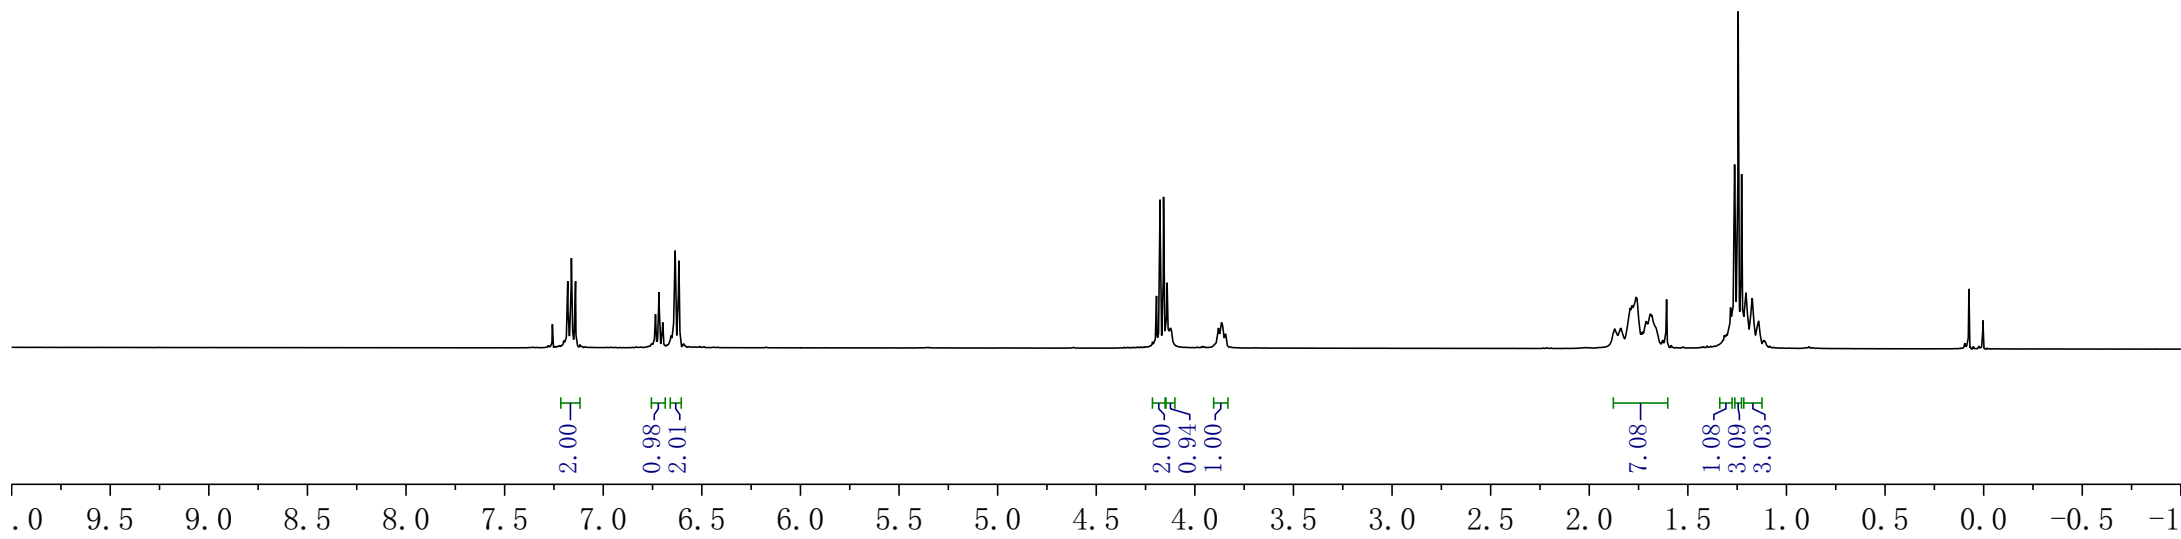

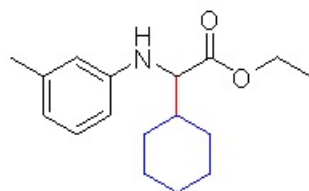

3ua

7.0685  
7.0493  
7.0301  
6.5544  
6.5363  
6.4594  
6.4476  
6.4275

4.1980  
4.1801  
4.1622  
4.1443  
4.0813  
3.8608  
3.8491

2.2629  
1.8656  
1.8365  
1.7890  
1.7827  
1.7597  
1.7548  
1.7259  
1.7079  
1.6802  
1.2677  
1.2499  
1.2321  
1.2054  
1.1953  
1.1704  
1.1652  
1.1375  
1.1309  
1.1084

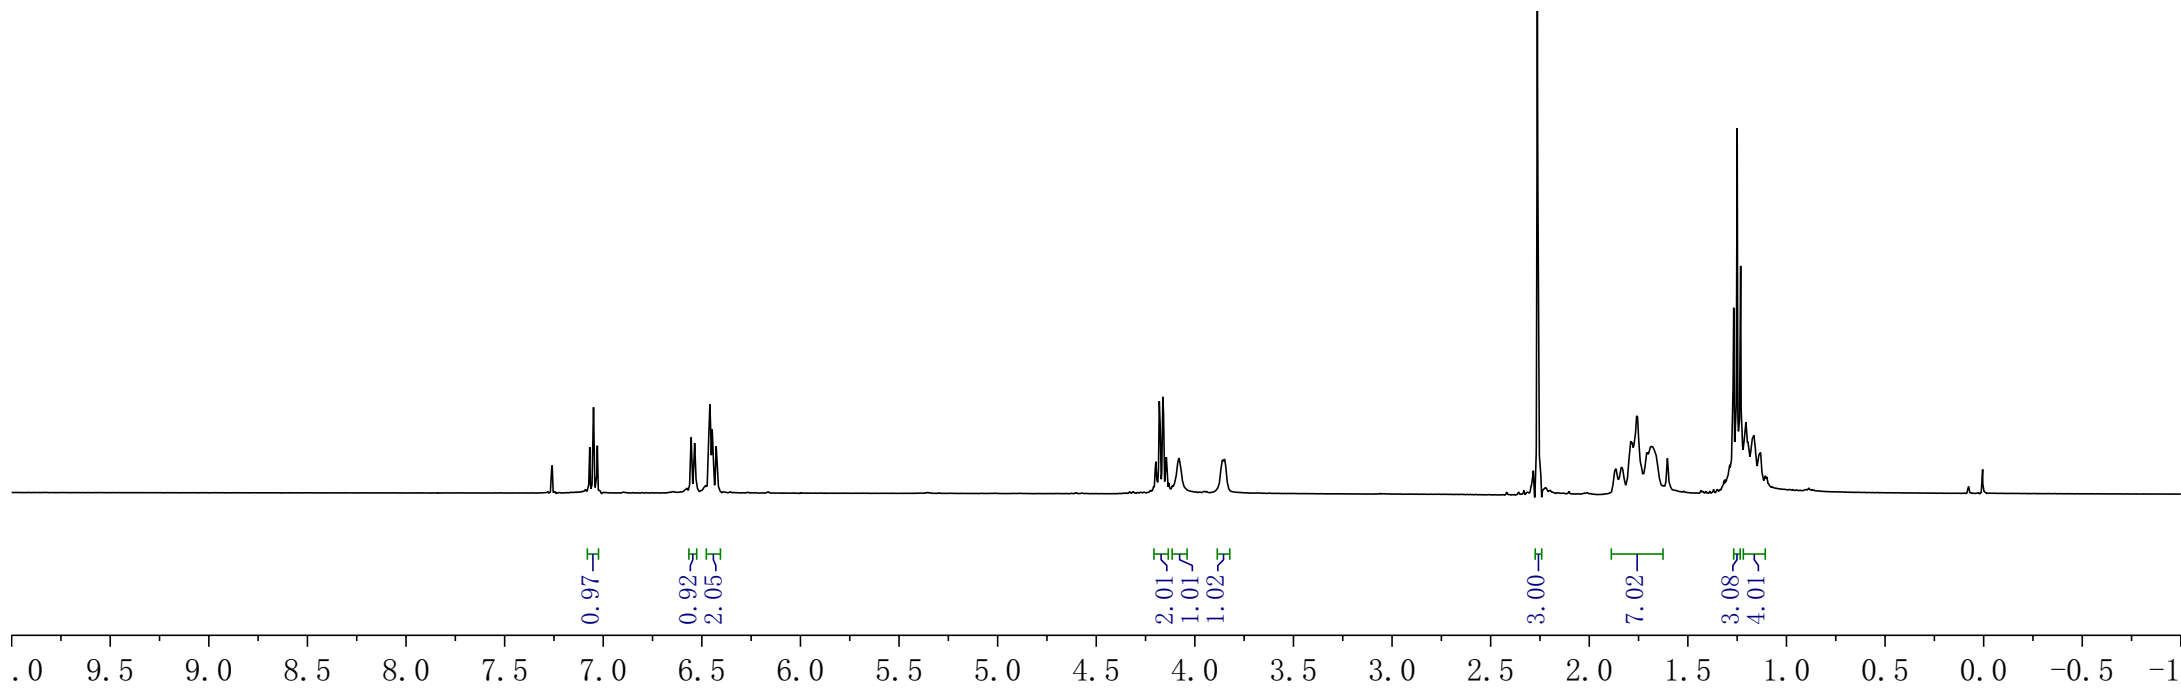

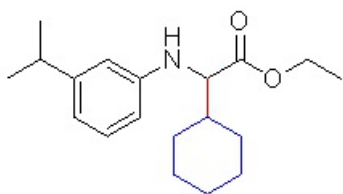

3va

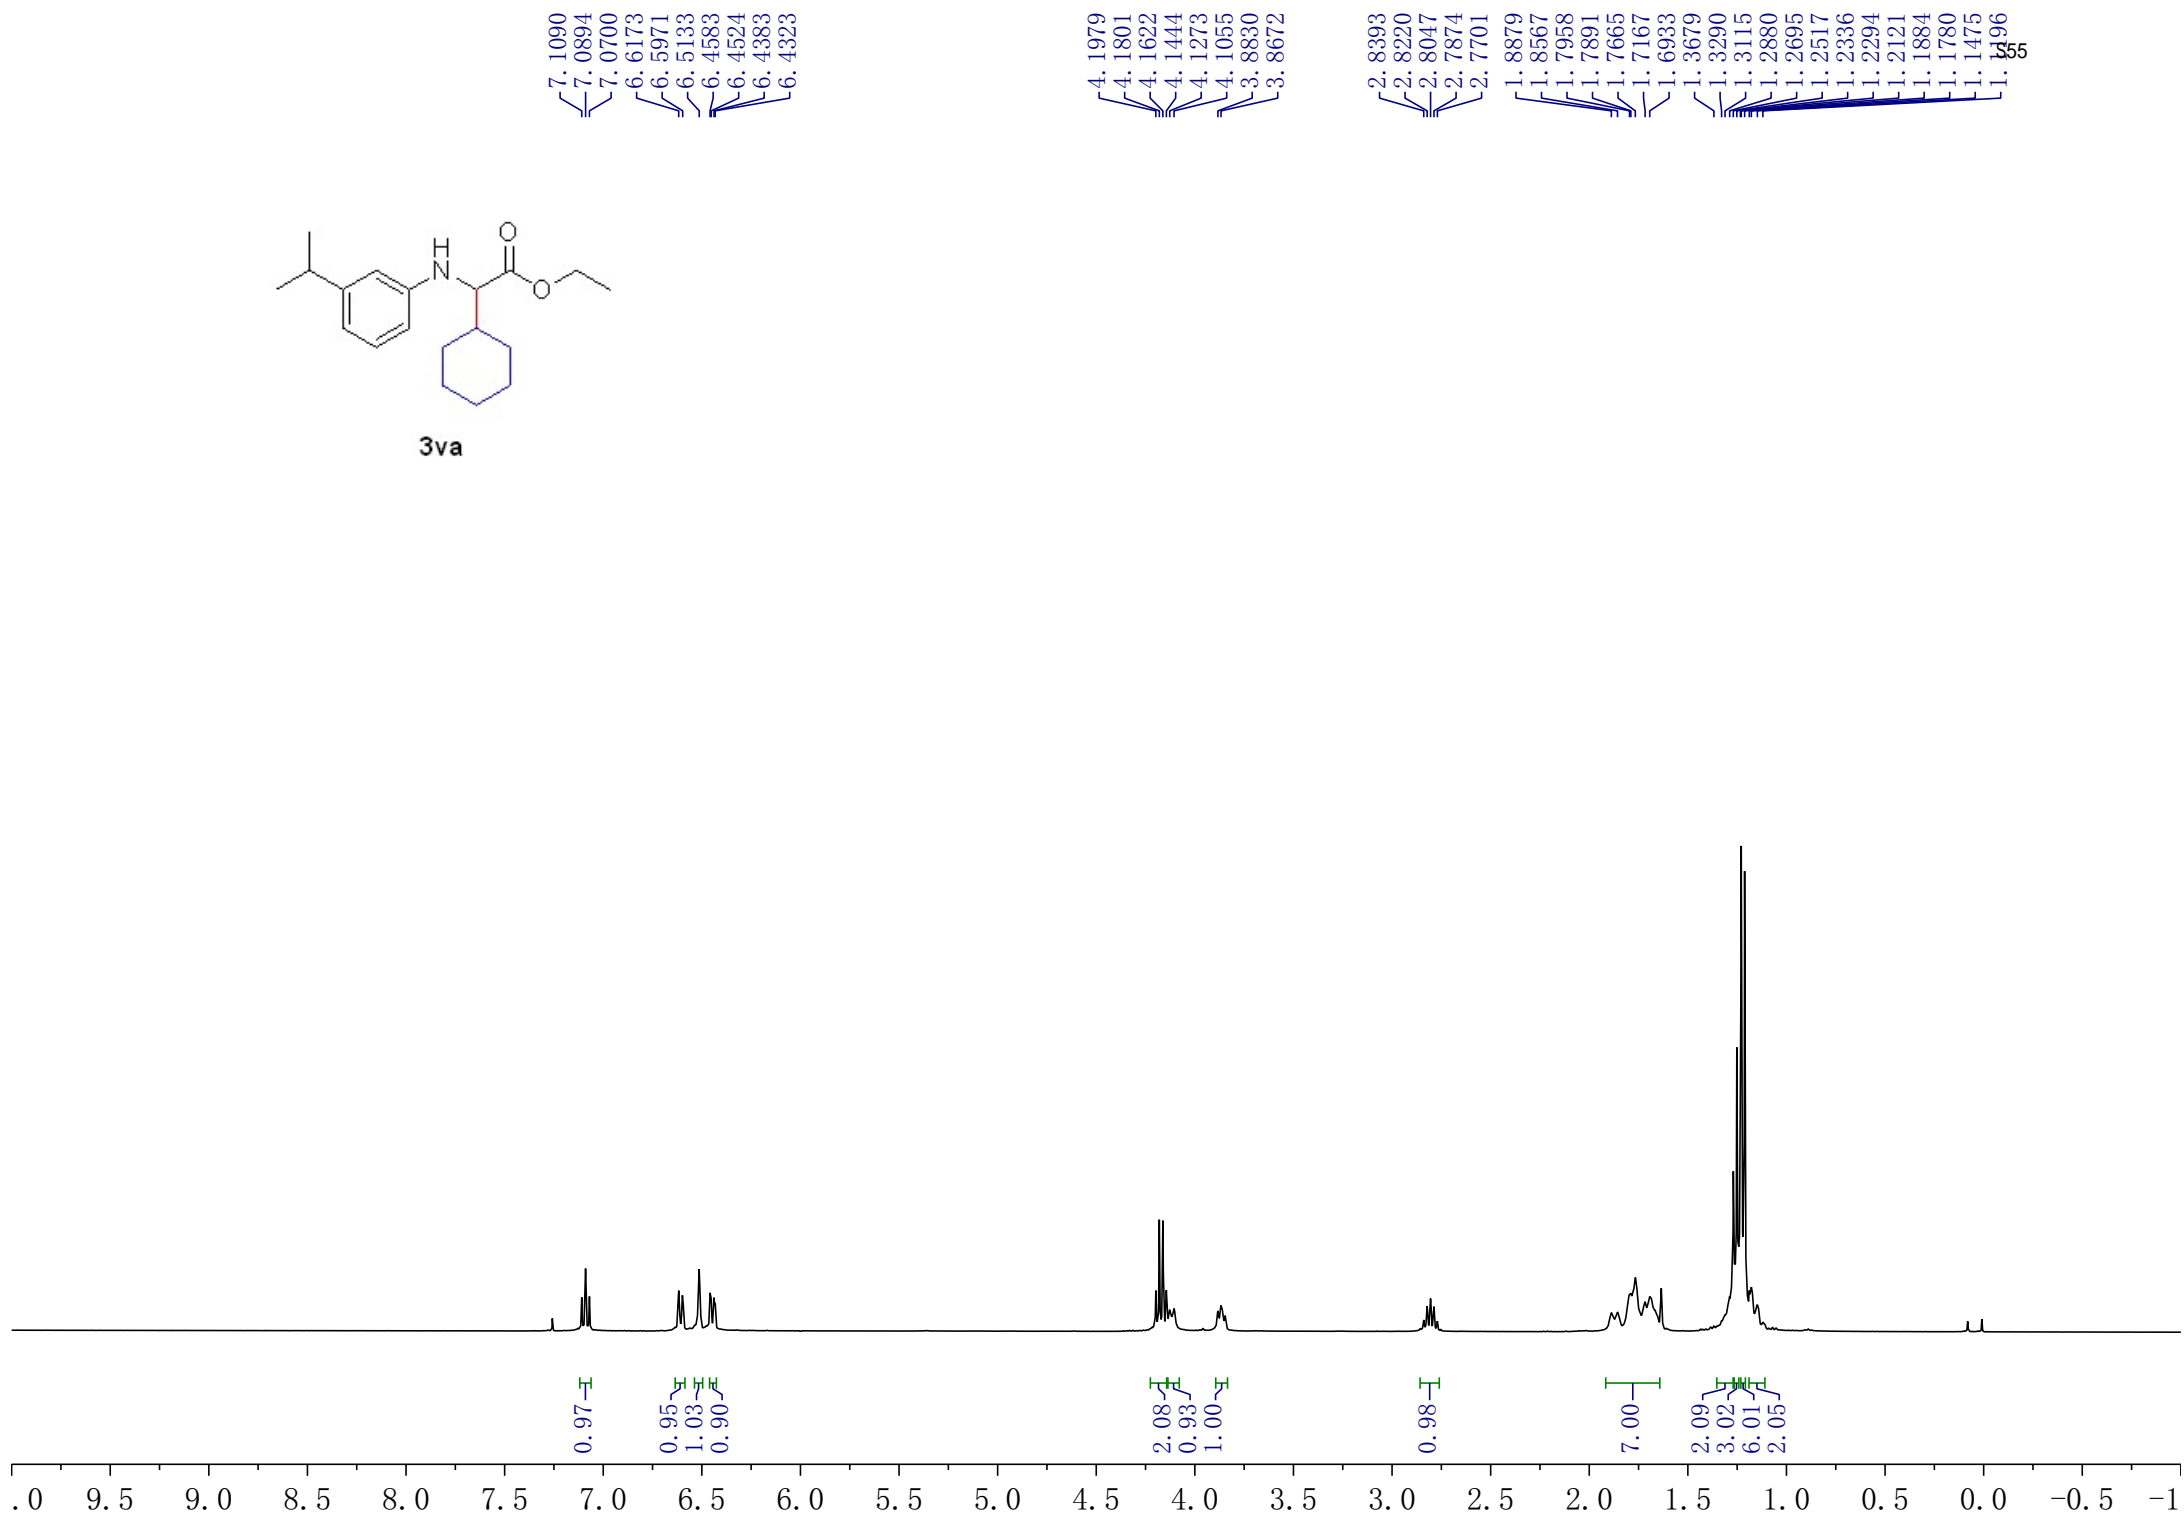

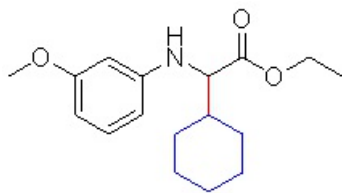

3wa

7.0773  
7.0570  
7.0368  
6.2925  
6.2871  
6.2722  
6.2673  
6.2452  
6.2404  
6.2254  
6.2203  
6.1804  
6.1747  
6.1691

4.1955  
4.1776  
4.1682  
4.1598  
4.1421  
3.8608  
3.8456  
3.8374  
3.8223  
3.7545

1.8533  
1.8219  
1.7675  
1.7586  
1.7515  
1.7234  
1.6773  
1.3696  
1.3594  
1.3309  
1.3009  
1.2933  
1.2825  
1.2675  
1.2497  
1.2318  
1.2168  
1.2072  
1.1923  
1.1621  
1.1521  
1.1373  
1.1314  
1.1260  
1.1018

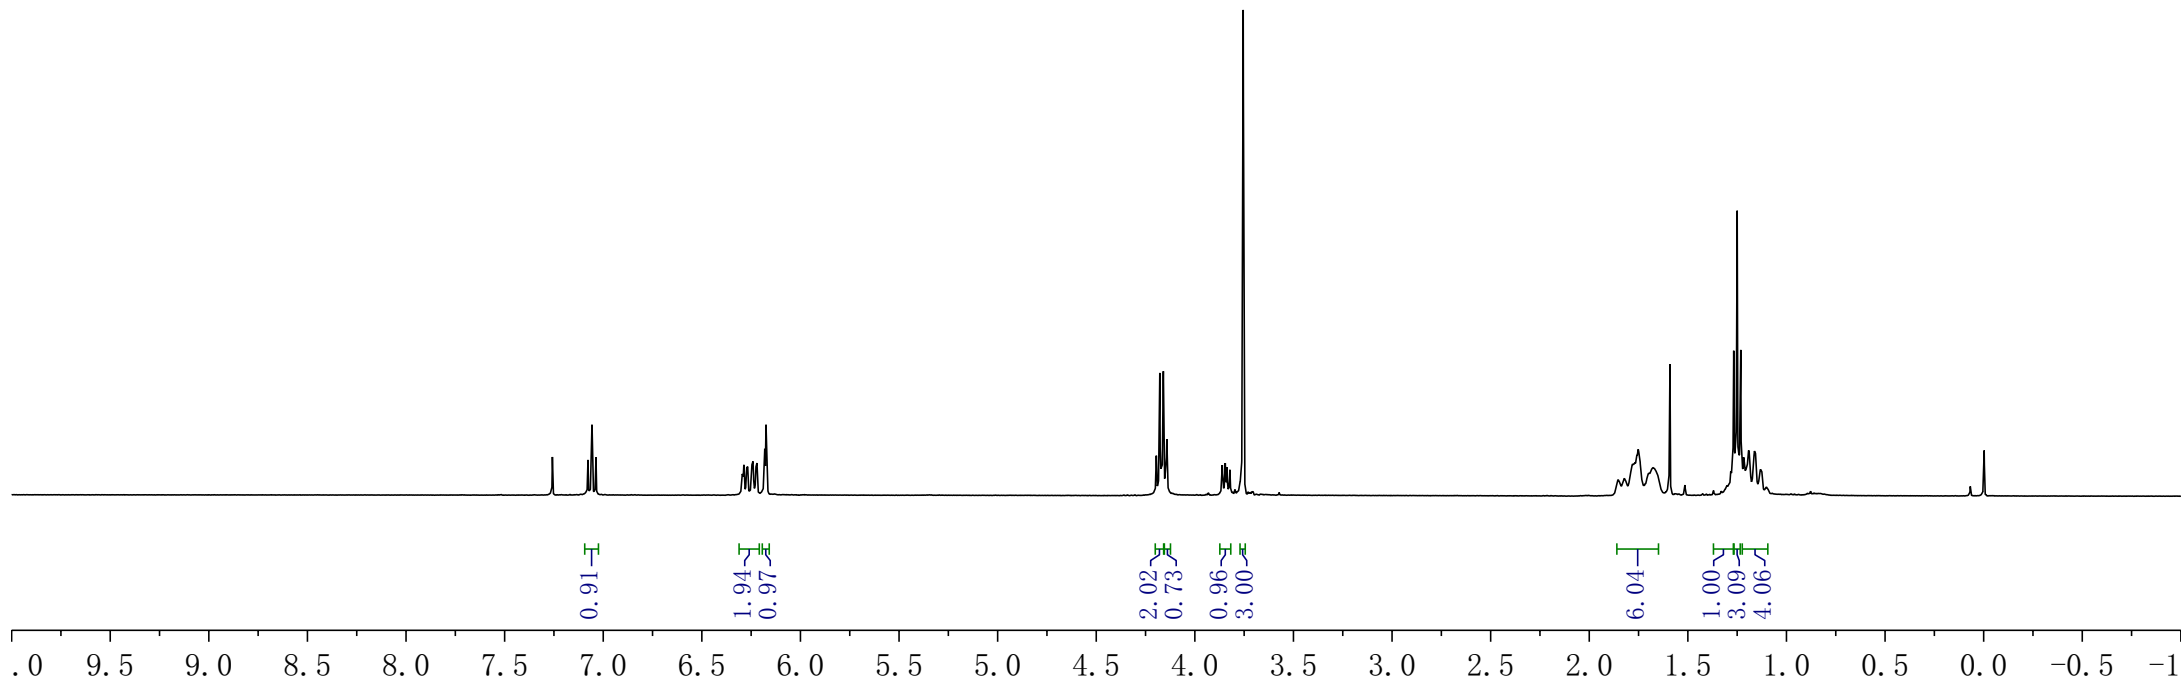



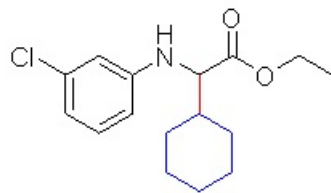

3xa

7.0733  
7.0532  
7.0330  
6.6852  
6.6655  
6.6009  
6.5957  
6.5904  
6.4980  
6.4922  
6.4775  
6.4717  
4.2206  
4.2171  
4.2117  
4.2079  
4.2028  
4.1991  
4.1938  
4.1900  
4.1850  
4.1812  
4.1759  
4.1722  
4.1635  
4.1580  
4.1545  
3.8228

1.8360  
1.7973  
1.7637  
1.7573  
1.7282  
1.7202  
1.6943  
1.6669  
1.6059  
1.2768  
1.2589  
1.2411  
1.2156  
1.2078  
1.1852  
1.1798  
1.1627  
1.1549  
1.1478  
1.1322  
1.1241  
1.1165  
1.1011

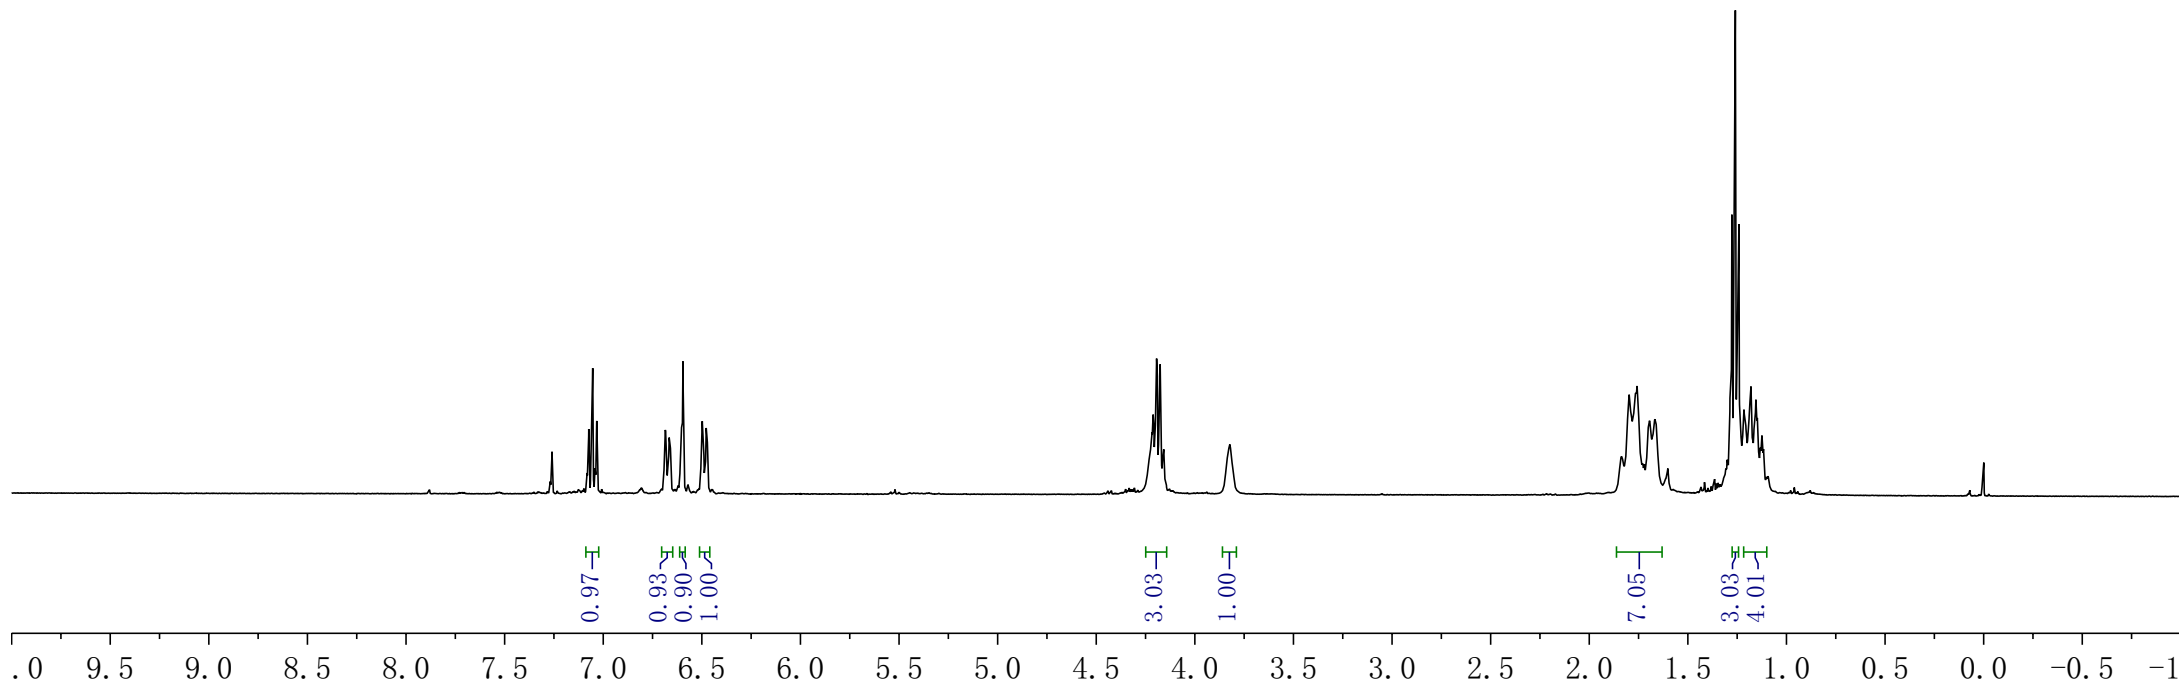

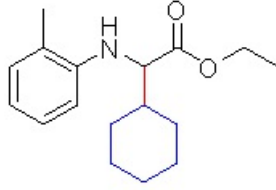

3ya

7.0970  
7.0781  
7.0639  
7.0478  
6.6831  
6.6647  
6.6463  
6.5708  
6.5509

4.2010  
4.1831  
4.1654  
4.1475  
4.0571  
4.0347  
3.9304  
3.9152

2.2120  
1.9150  
1.8831  
1.8017  
1.7933  
1.7804  
1.7725  
1.7651  
1.7314  
1.6999  
1.6692

1.3330  
1.3240  
1.3152  
1.2973  
1.2920  
1.2841  
1.2816  
1.2802  
1.2767  
1.2737  
1.2559  
1.2580  
1.2581  
1.2154  
1.2091  
1.1979  
1.1868  
1.1794  
1.1677  
1.1483

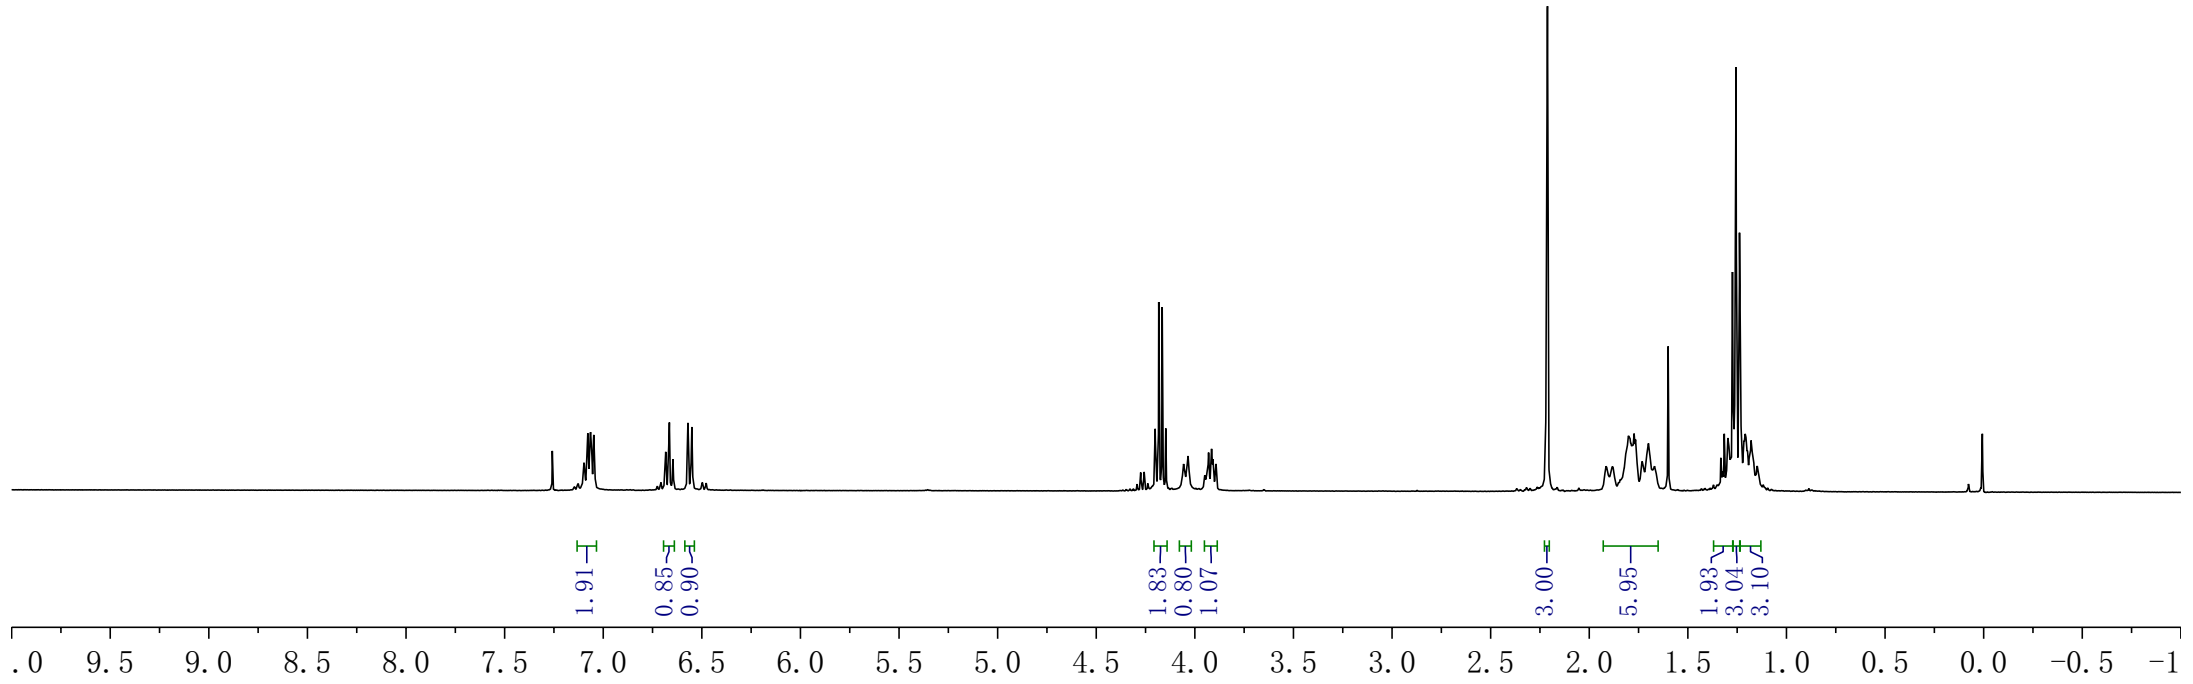

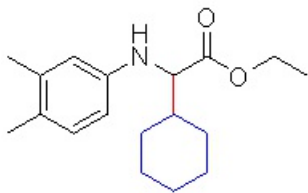

3za

6.9263  
6.9061  
6.4713  
6.4653  
6.4049  
6.3986  
6.3848  
6.3785

4.1896  
4.1847  
4.1810  
4.1718  
4.1670  
4.1539  
4.1492  
4.1399  
4.1360  
4.1314  
3.8298  
3.8145

2.1777  
2.1366  
1.8673  
1.8357  
1.7849  
1.7770  
1.7539  
1.7334  
1.6977  
1.6890  
1.6847  
1.6761  
1.6663

1.3213  
1.3126  
1.3051  
1.2973  
1.2901  
1.2825  
1.2723  
1.2659  
1.2480  
1.2302  
1.2114  
1.1893  
1.1819  
1.1684  
1.1602  
1.1522  
1.1380  
1.1298  
1.1276

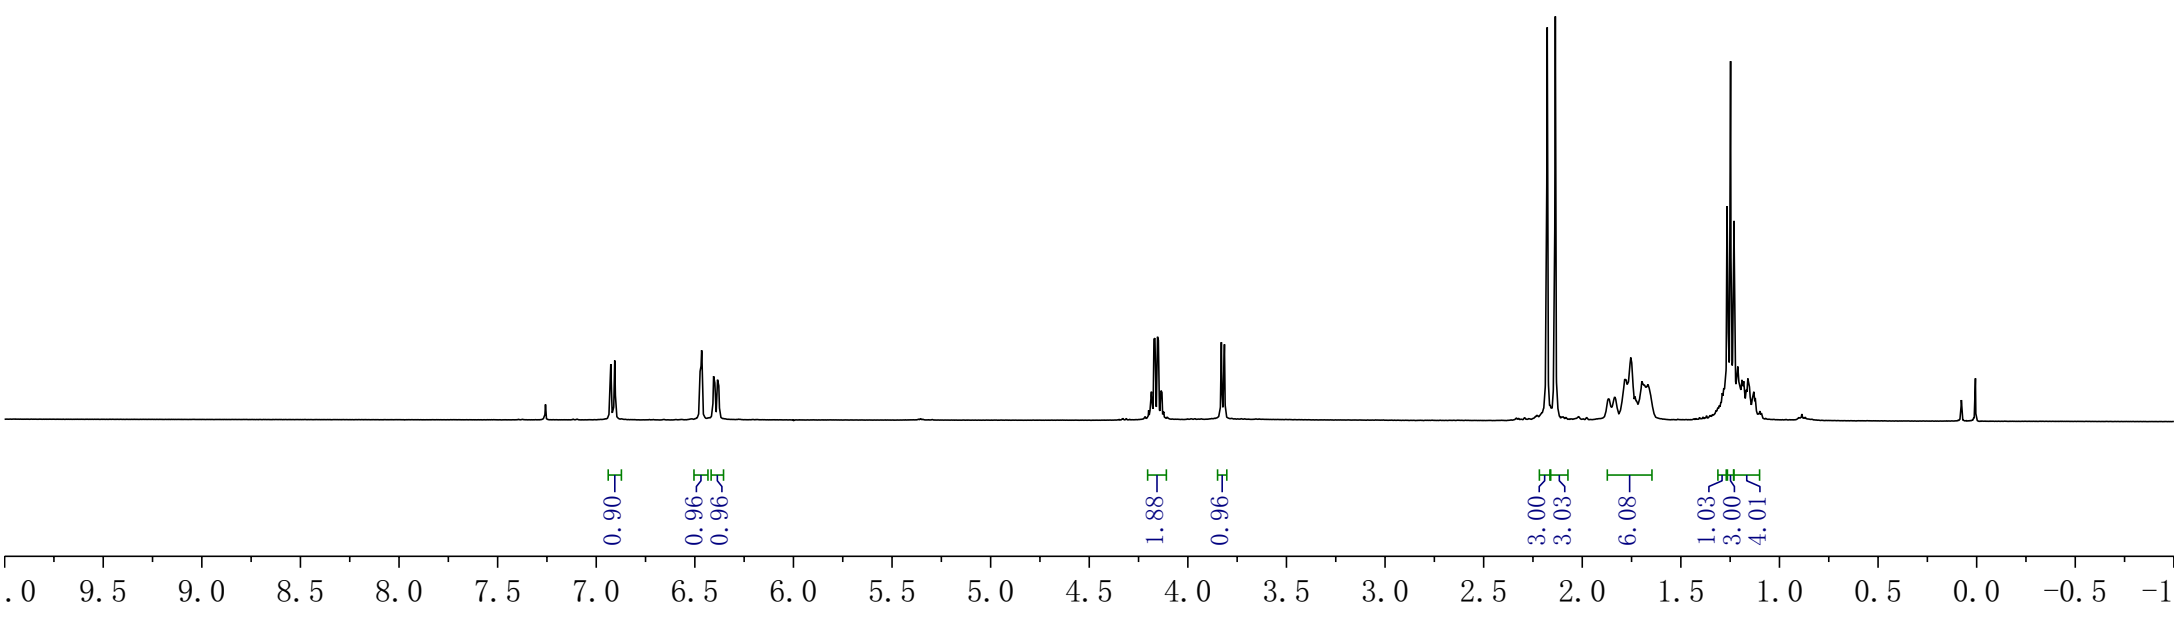

0.90

0.96  
0.96

1.88

0.96

3.00  
3.03

6.08

1.03  
3.00  
4.01

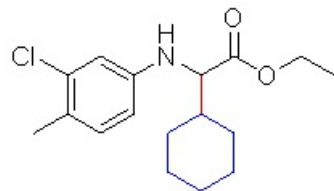

3aaa

6.9853  
6.9647  
6.6363  
6.6303  
6.4508  
6.4447  
6.4302  
6.4242

4.2004  
4.1944  
4.1825  
4.1767  
4.1646  
4.1589  
4.1492  
4.1468  
4.1412  
4.0791  
4.0553  
3.8068  
3.7916  
3.7832  
3.7679

2.2269  
1.8386  
1.7919  
1.7833  
1.7756  
1.7518  
1.7122  
1.6874  
1.6565  
1.6228  
1.2703  
1.2525  
1.2347  
1.2152  
1.2063  
1.1923  
1.1626  
1.1558  
1.1447  
1.1369  
1.1241  
1.1152  
1.1087  
1.0916  
1.0859

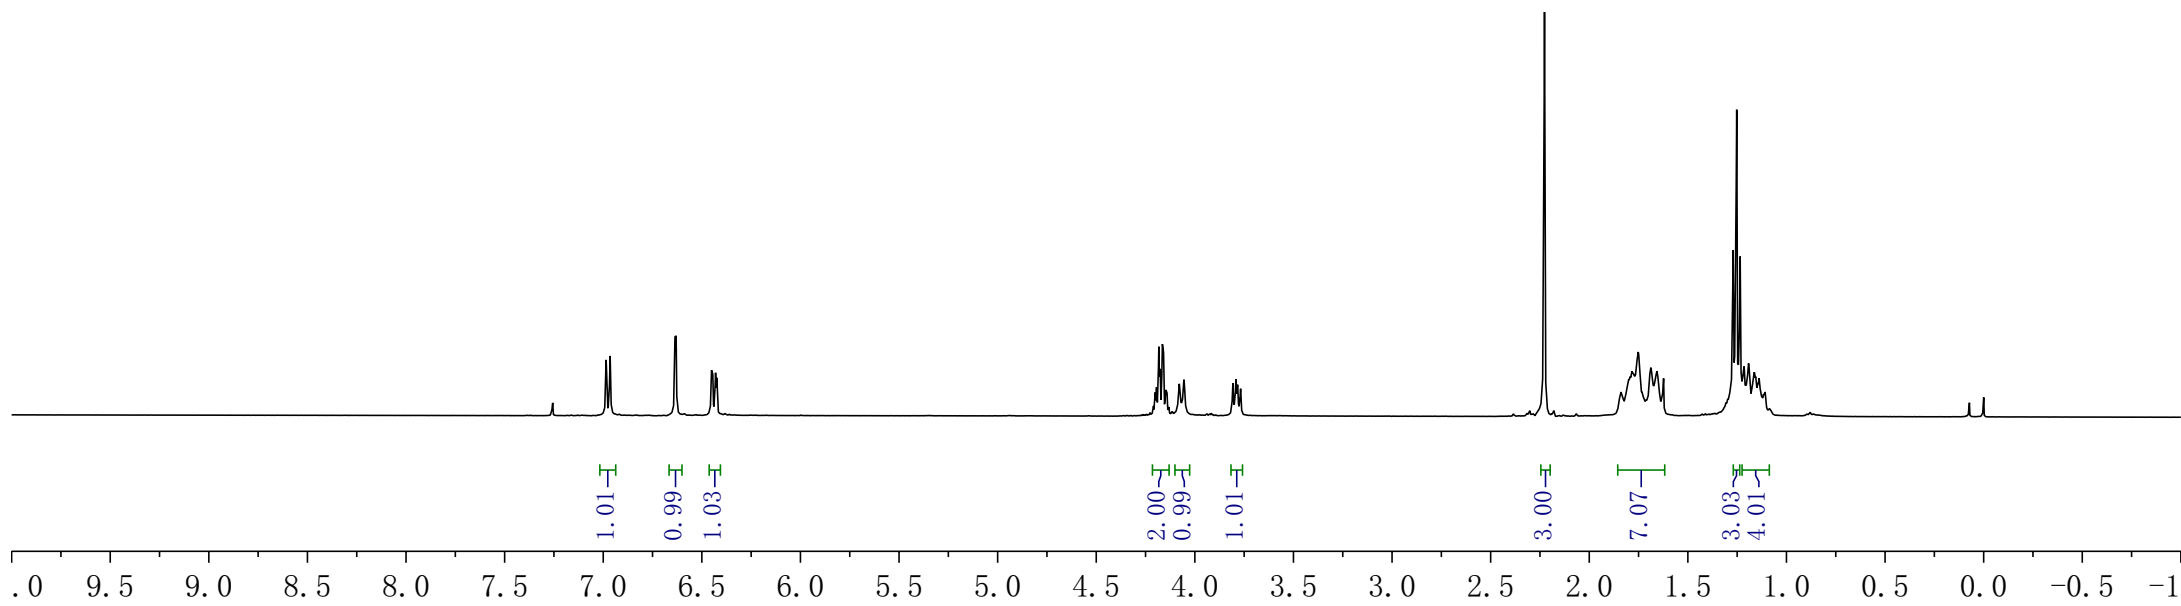

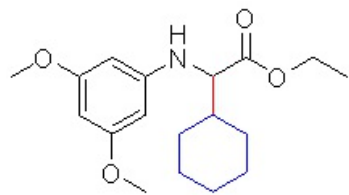

**3aba**

5.8806  
5.8759  
5.8090  
5.8045

4.2012  
4.1974  
4.1834  
4.1795  
4.1656  
4.1616  
4.1479  
3.8398  
3.8255  
3.8194  
3.8041  
3.7357  
3.7318

1.8408  
1.8094  
1.7736  
1.7471  
1.6581  
1.3270  
1.2979  
1.2909  
1.2711  
1.2575  
1.2396  
1.2087  
1.1845  
1.1554  
1.1244  
1.0955

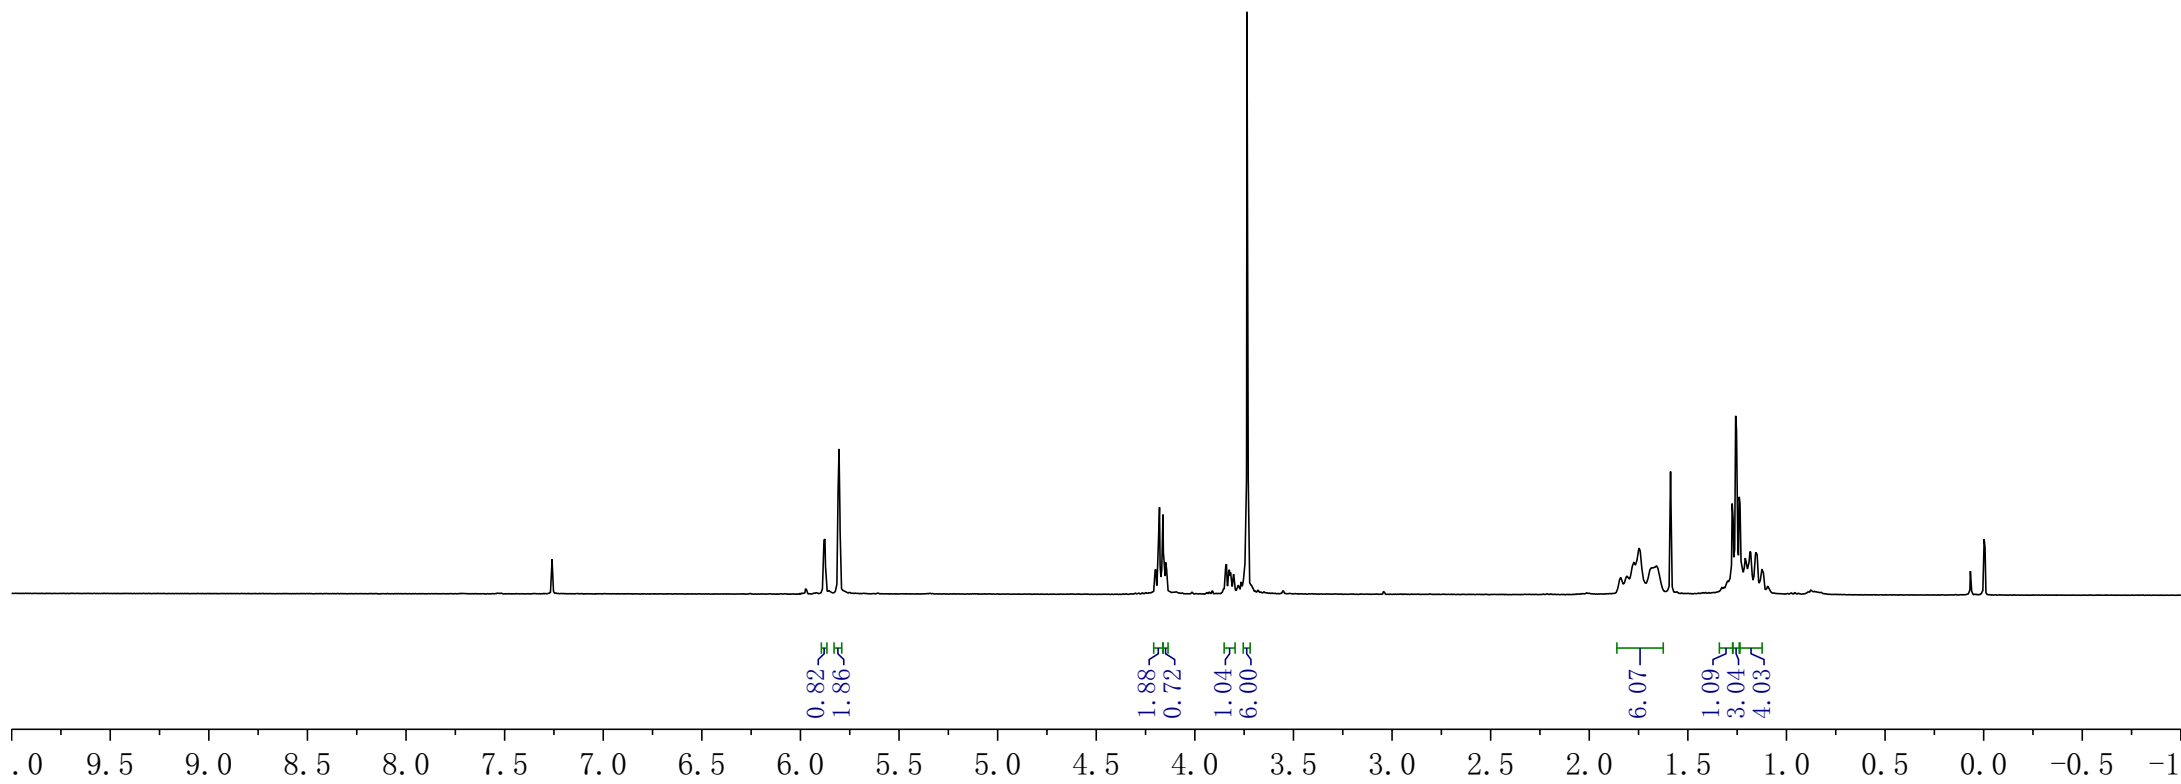

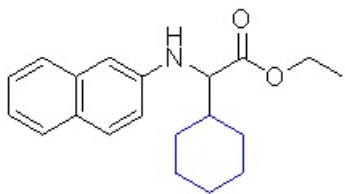

3aca

7.6770  
7.6567  
7.6459  
7.6238  
7.6090  
7.5884  
7.3765  
7.3734  
7.3594  
7.3561  
7.3528  
7.3388  
7.3357  
7.2240  
7.2211  
7.2069  
7.2039  
7.2008  
7.1867  
7.1837  
6.9447  
6.9387  
6.9228  
6.9168  
6.8186  
6.8128

4.3265  
4.2202  
4.2111  
4.2023  
4.1931  
4.1844  
4.1753  
4.1664  
4.1575  
4.1482  
4.0234  
4.0083  
1.9338  
1.9015  
1.8727  
1.8532  
1.8450  
1.8373  
1.8287  
1.8186  
1.8100  
1.8009  
1.7883  
1.7644  
1.7360  
1.7136  
1.7102  
1.6816  
1.3683  
1.3451  
1.3327  
1.3288  
1.3146  
1.3033  
1.2969  
1.2762  
1.2584  
1.2406  
1.2256  
1.2185  
1.2087  
1.1964  
1.1900  
1.1649  
1.1347

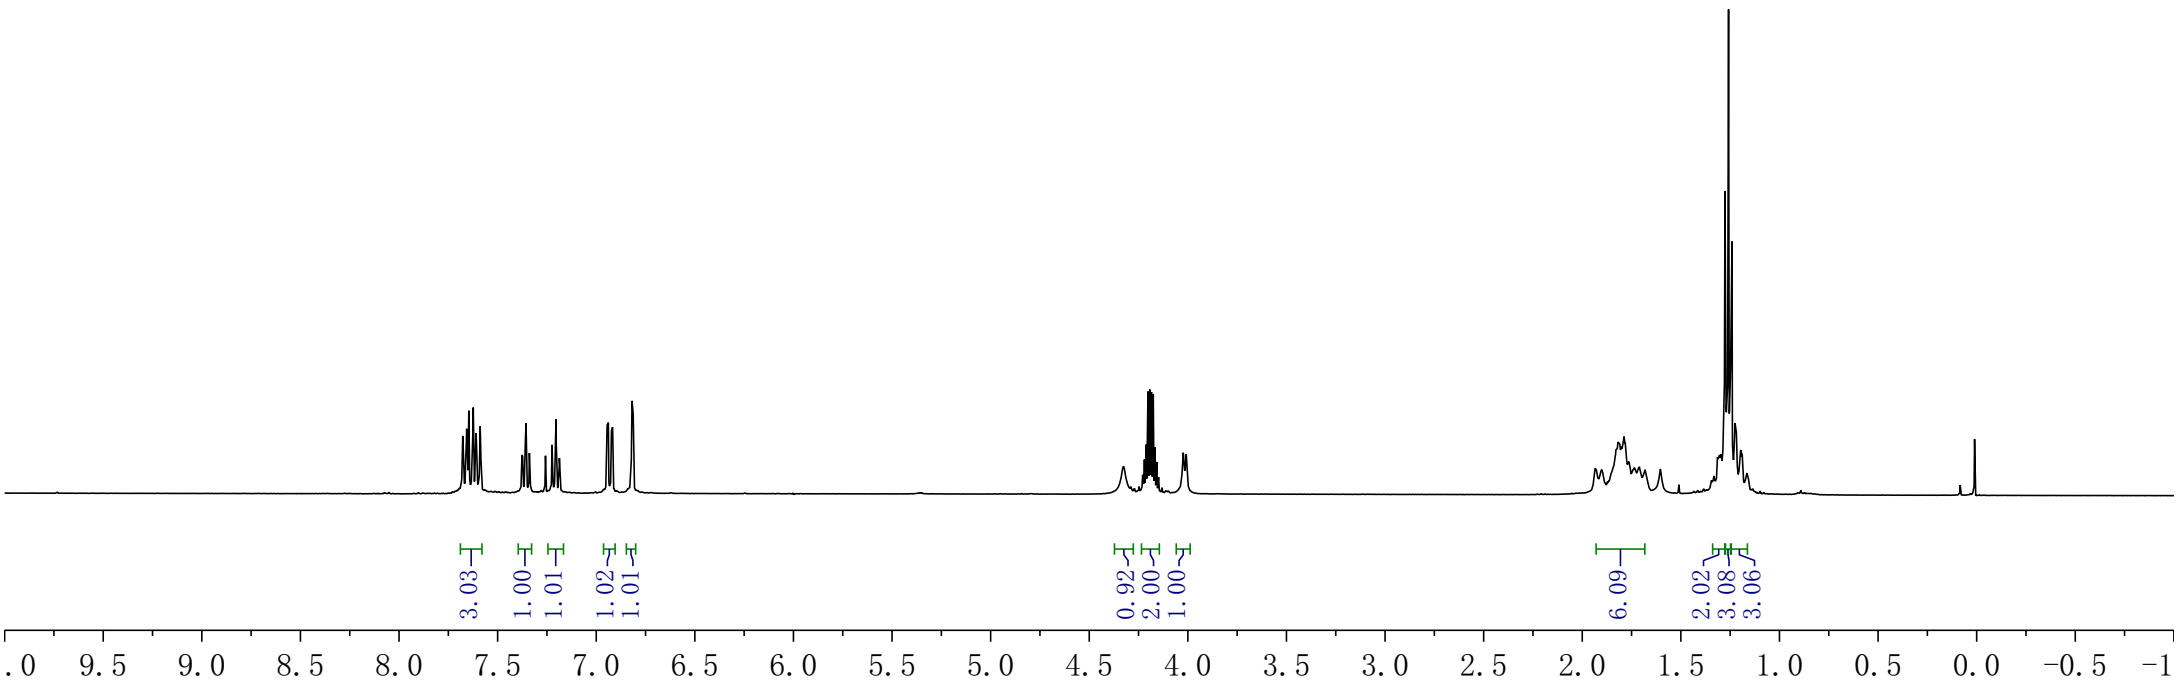

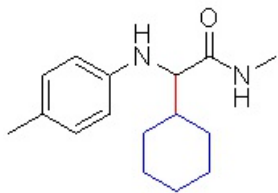

3ada

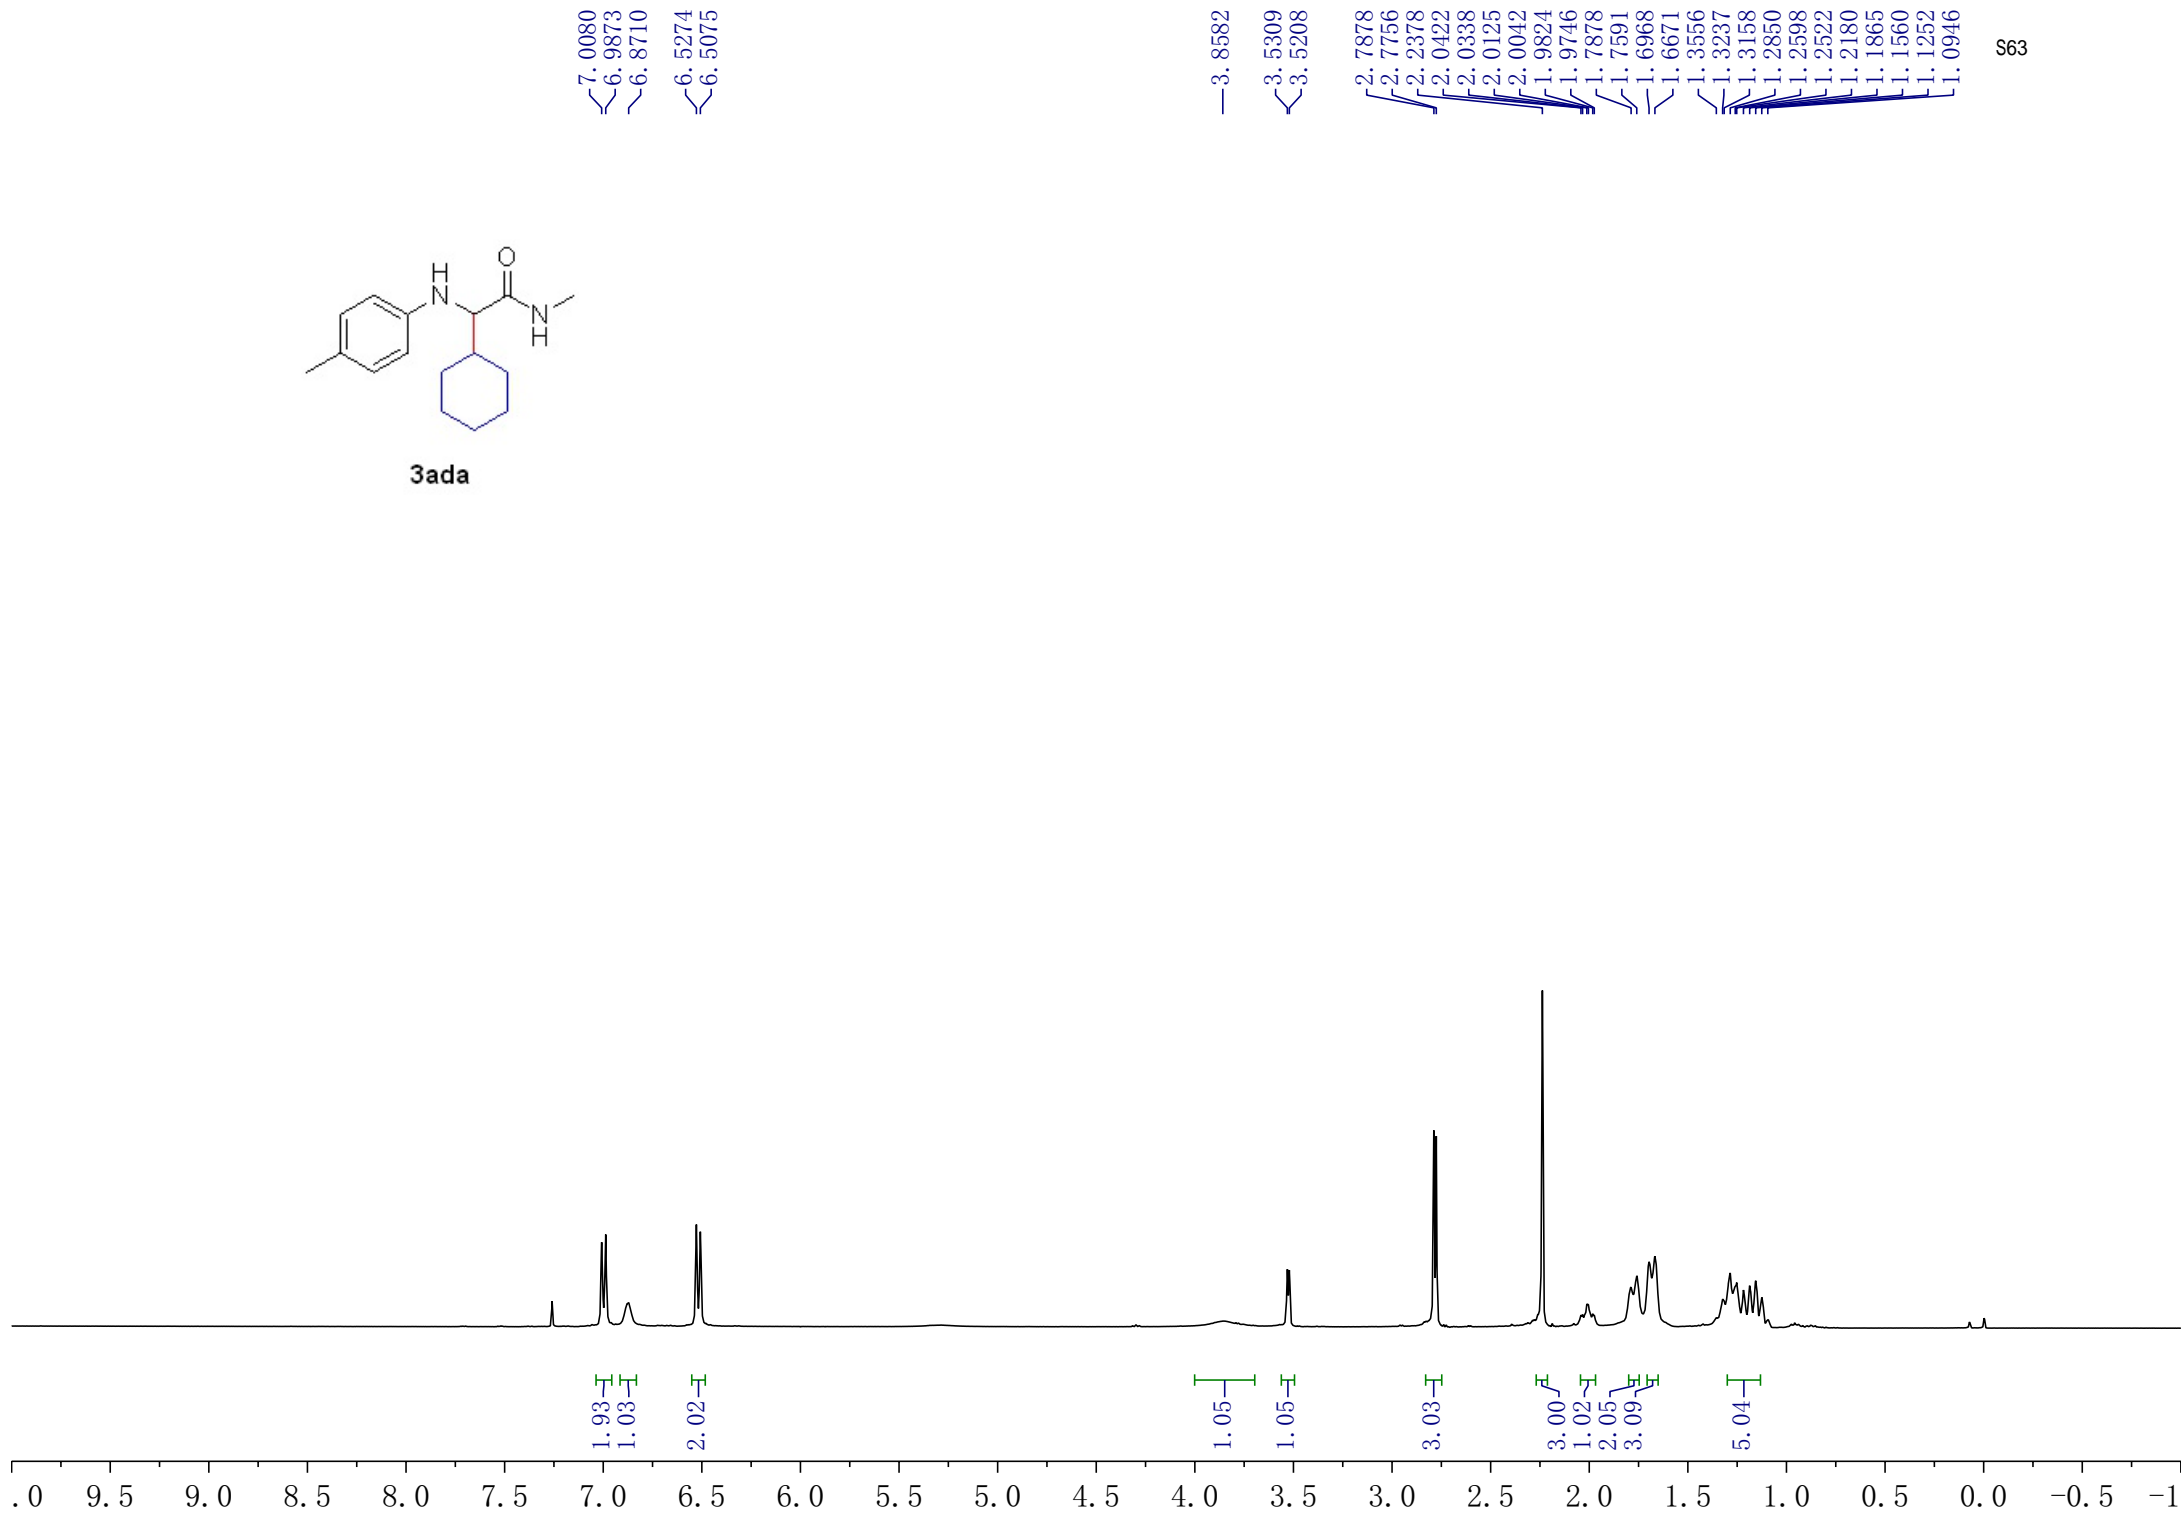

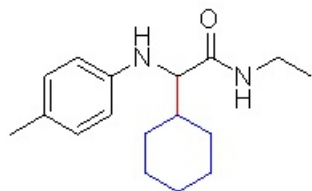

3aea

7.0103  
6.9893  
6.8328  
6.5296  
6.5088

3.7698  
3.4966  
3.4890  
3.3604  
3.3445  
3.3268  
3.3107  
3.2929  
3.2828  
3.2749  
3.2648  
3.2497  
3.2321  
3.2149  
3.1987  
2.2402  
2.0575  
2.0493  
2.0277  
2.0193  
1.9977  
1.7886  
1.7580  
1.6986  
1.6691  
1.3291  
1.2972  
1.2879  
1.2799  
1.2495  
1.2257  
1.2162  
1.2083  
1.1844  
1.1768  
1.1528  
1.1452  
1.1213  
1.0880  
1.0697  
1.0516

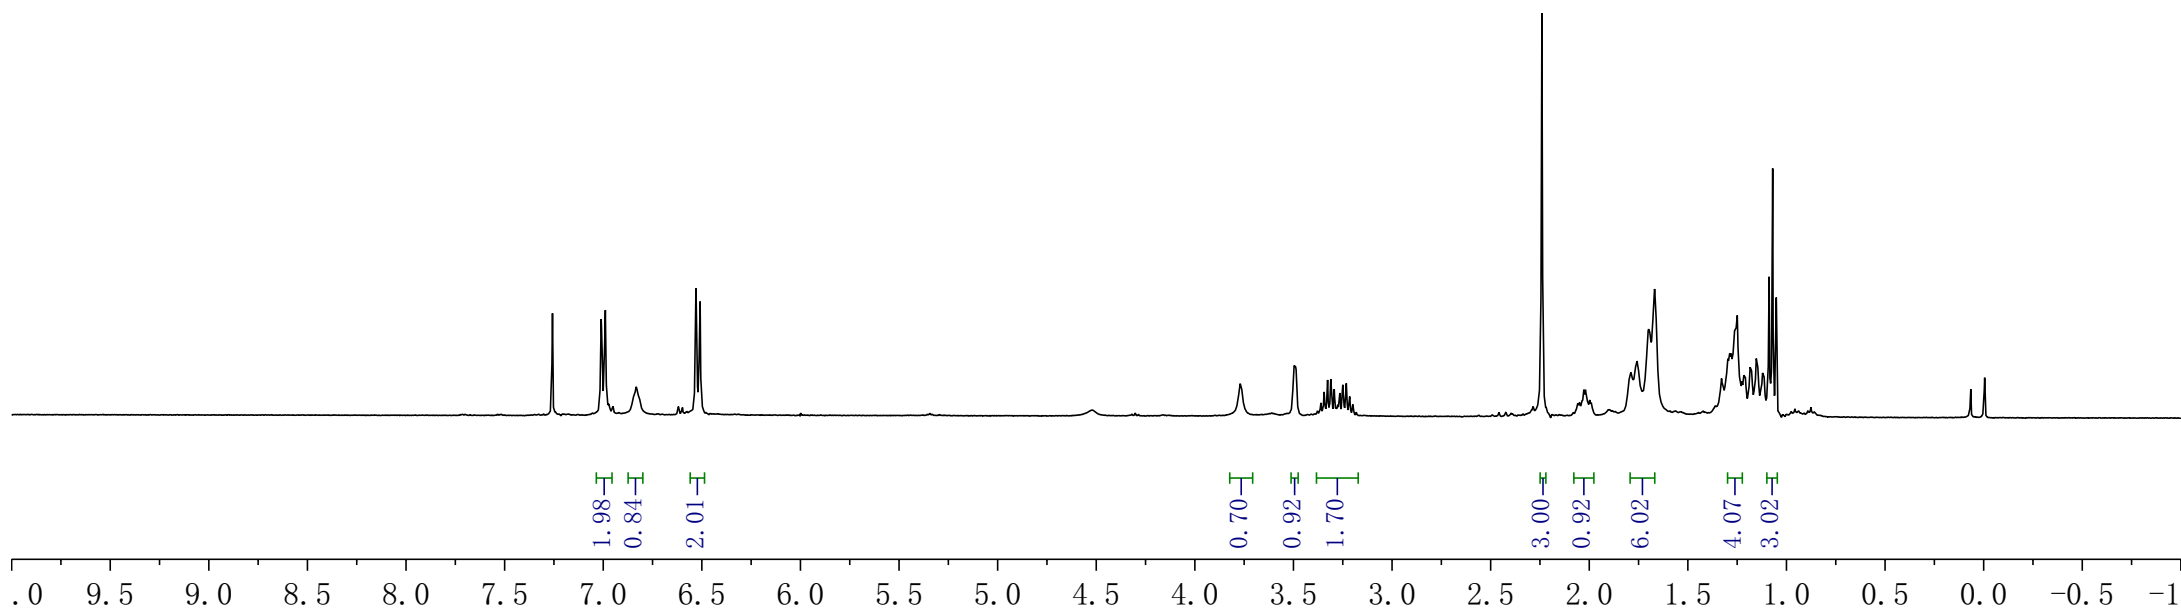



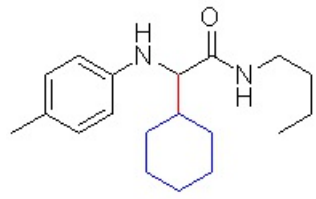

**3afa** (74 %)

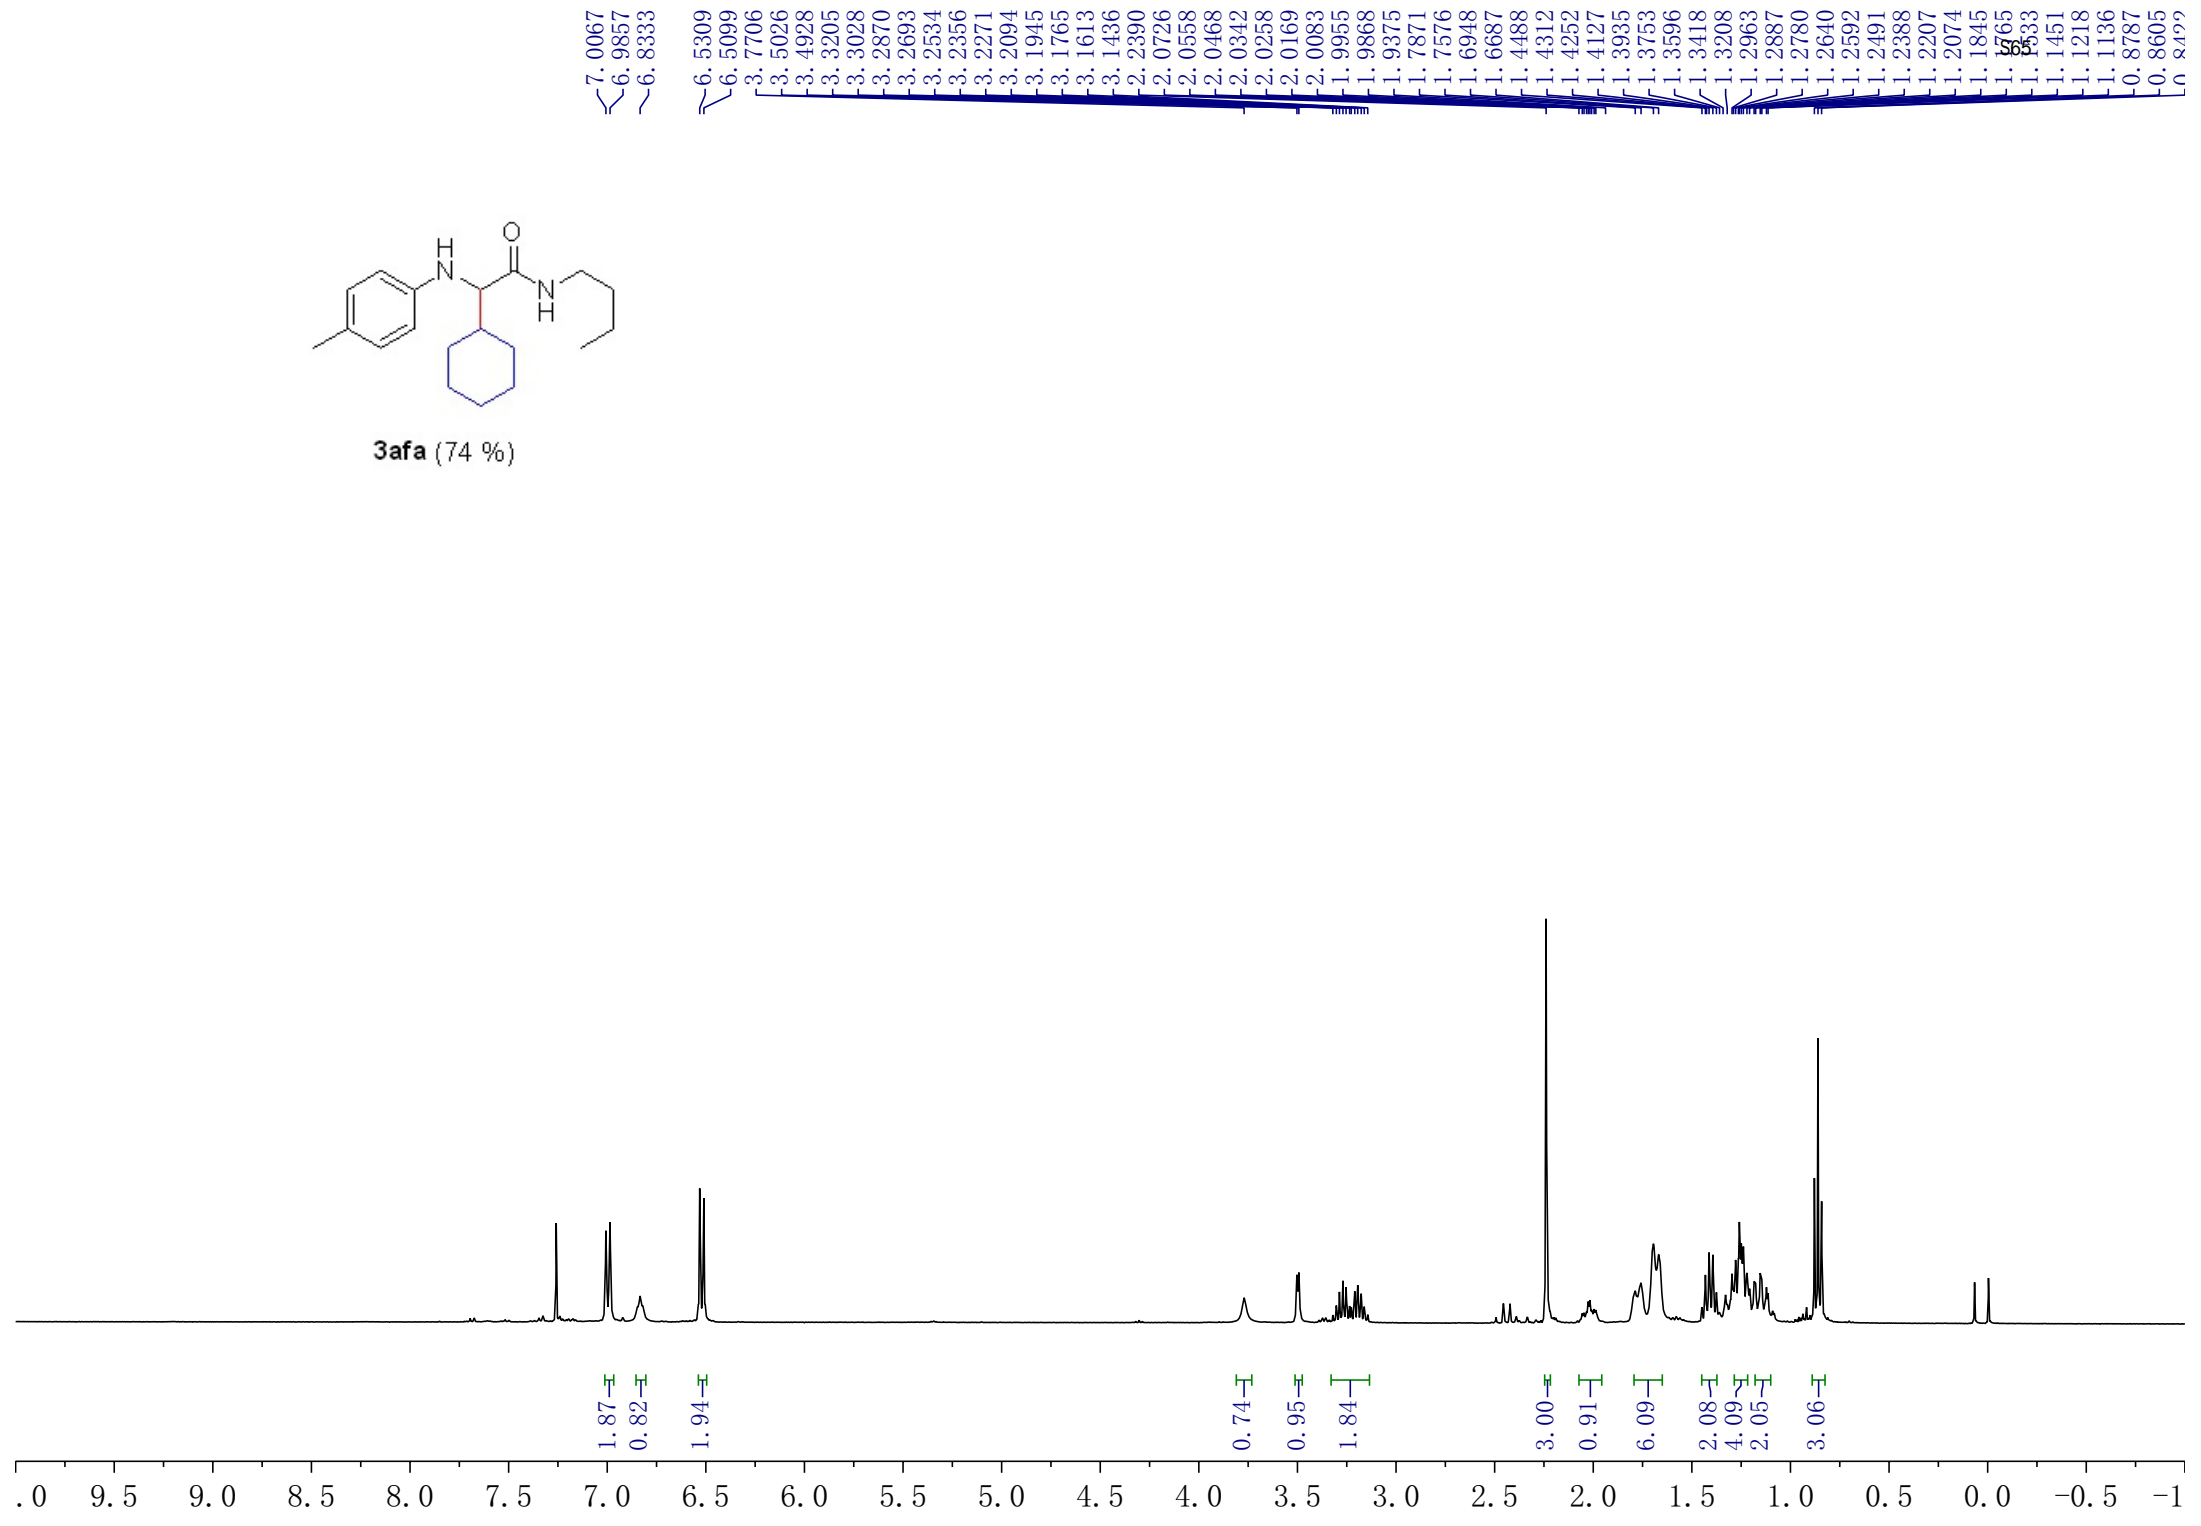

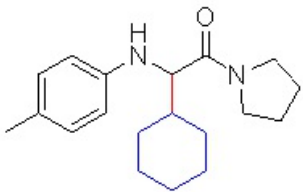

3aga

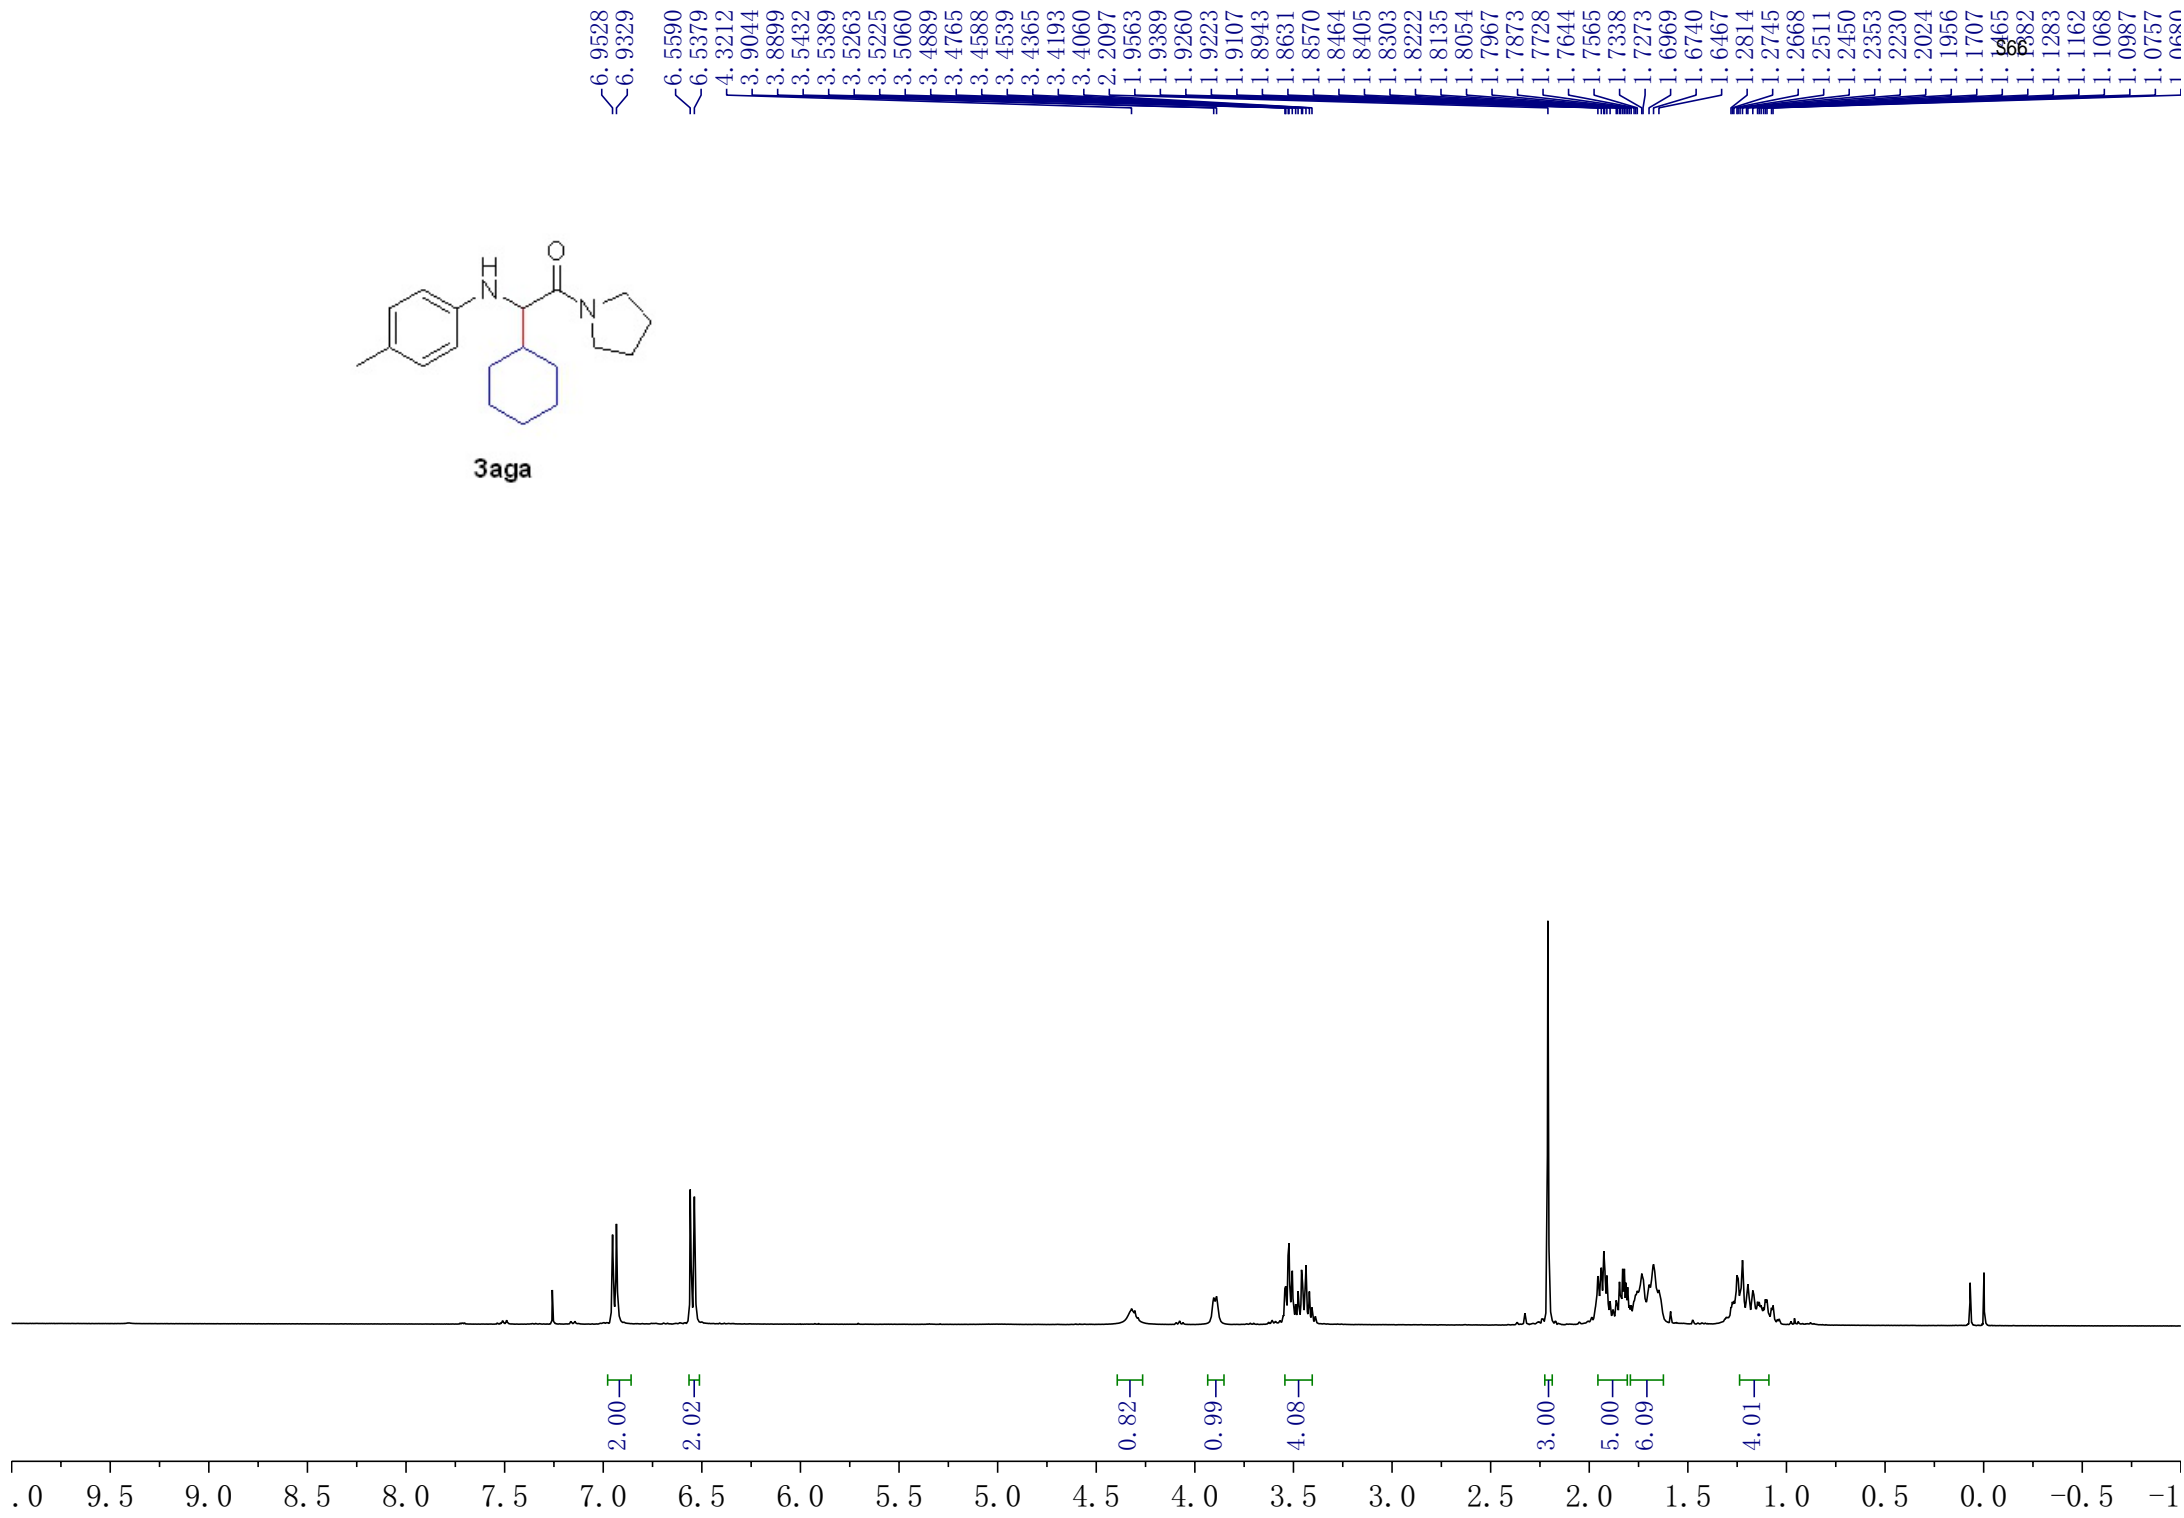

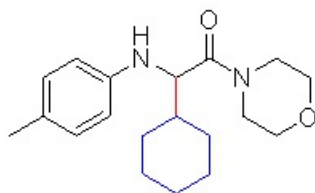

3aha

6.9626  
6.9422

6.5523  
6.5326

4.3126  
4.0442  
4.0298  
3.6261  
3.6147  
3.5863  
3.5647  
3.5533

2.2145  
1.8986  
1.8695  
1.7496  
1.6995  
1.6762  
1.6520  
1.5610  
1.2646  
1.2417  
1.2151  
1.1764  
1.1463  
1.1157  
1.0864

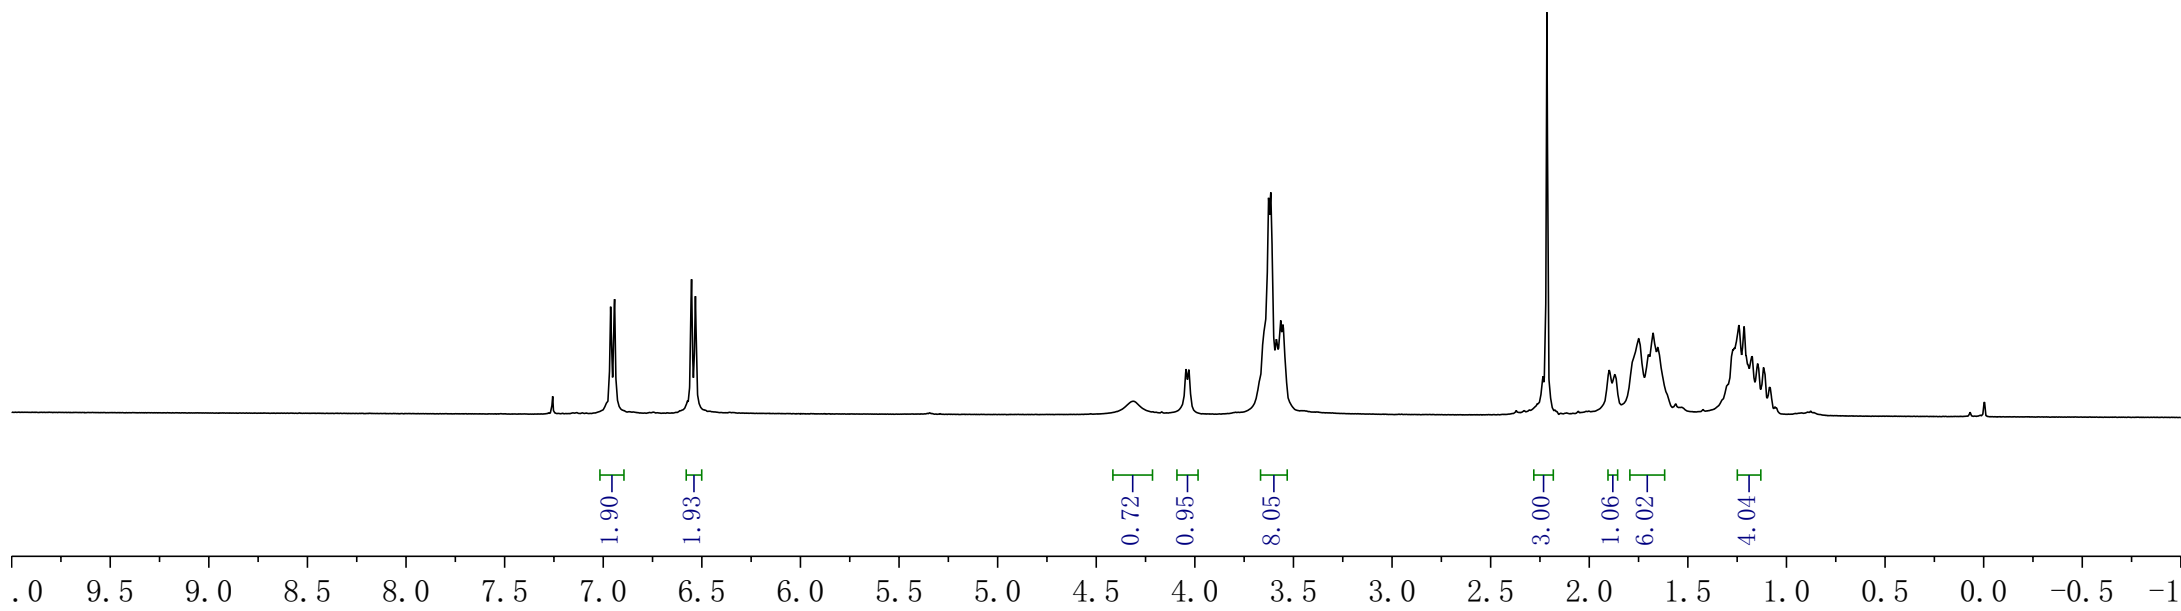

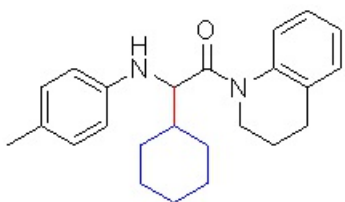

3aia

7.1793  
7.0284  
6.9108  
6.8920

6.3742  
6.3580

4.4368  
4.1931  
3.9803  
3.9643  
3.9502

3.5845  
3.5694

2.5419  
2.2205  
2.0352  
2.0201  
2.0044  
1.8348  
1.8060  
1.6784  
1.1581  
1.1263  
1.1017  
1.0428  
1.0080  
0.9835  
0.9664  
0.9471  
0.9210  
0.8867

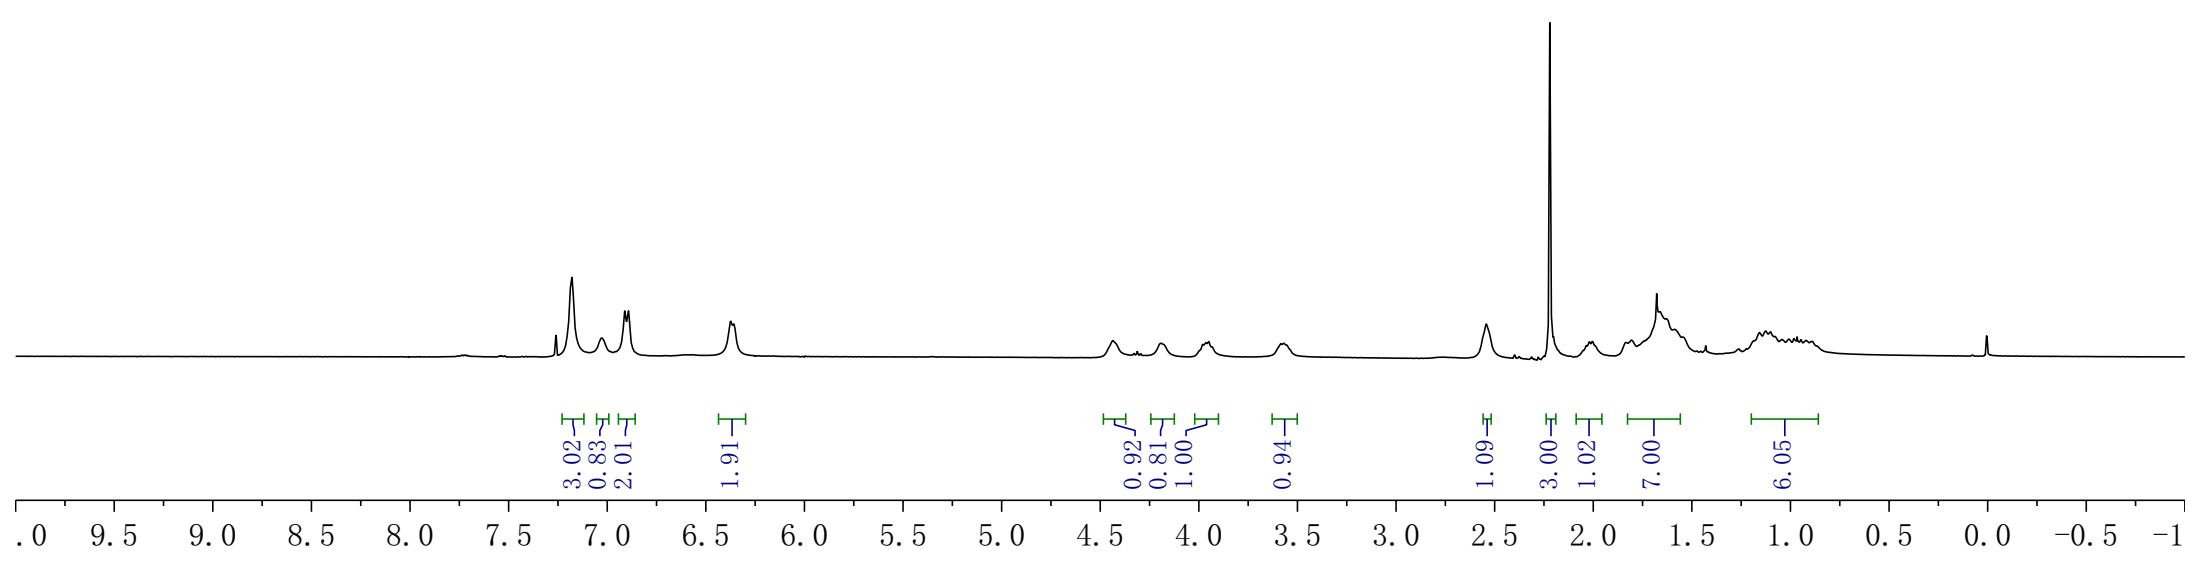

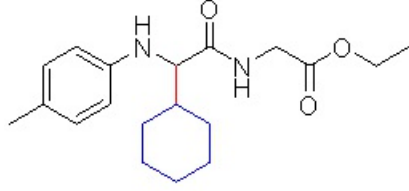

**3aja**

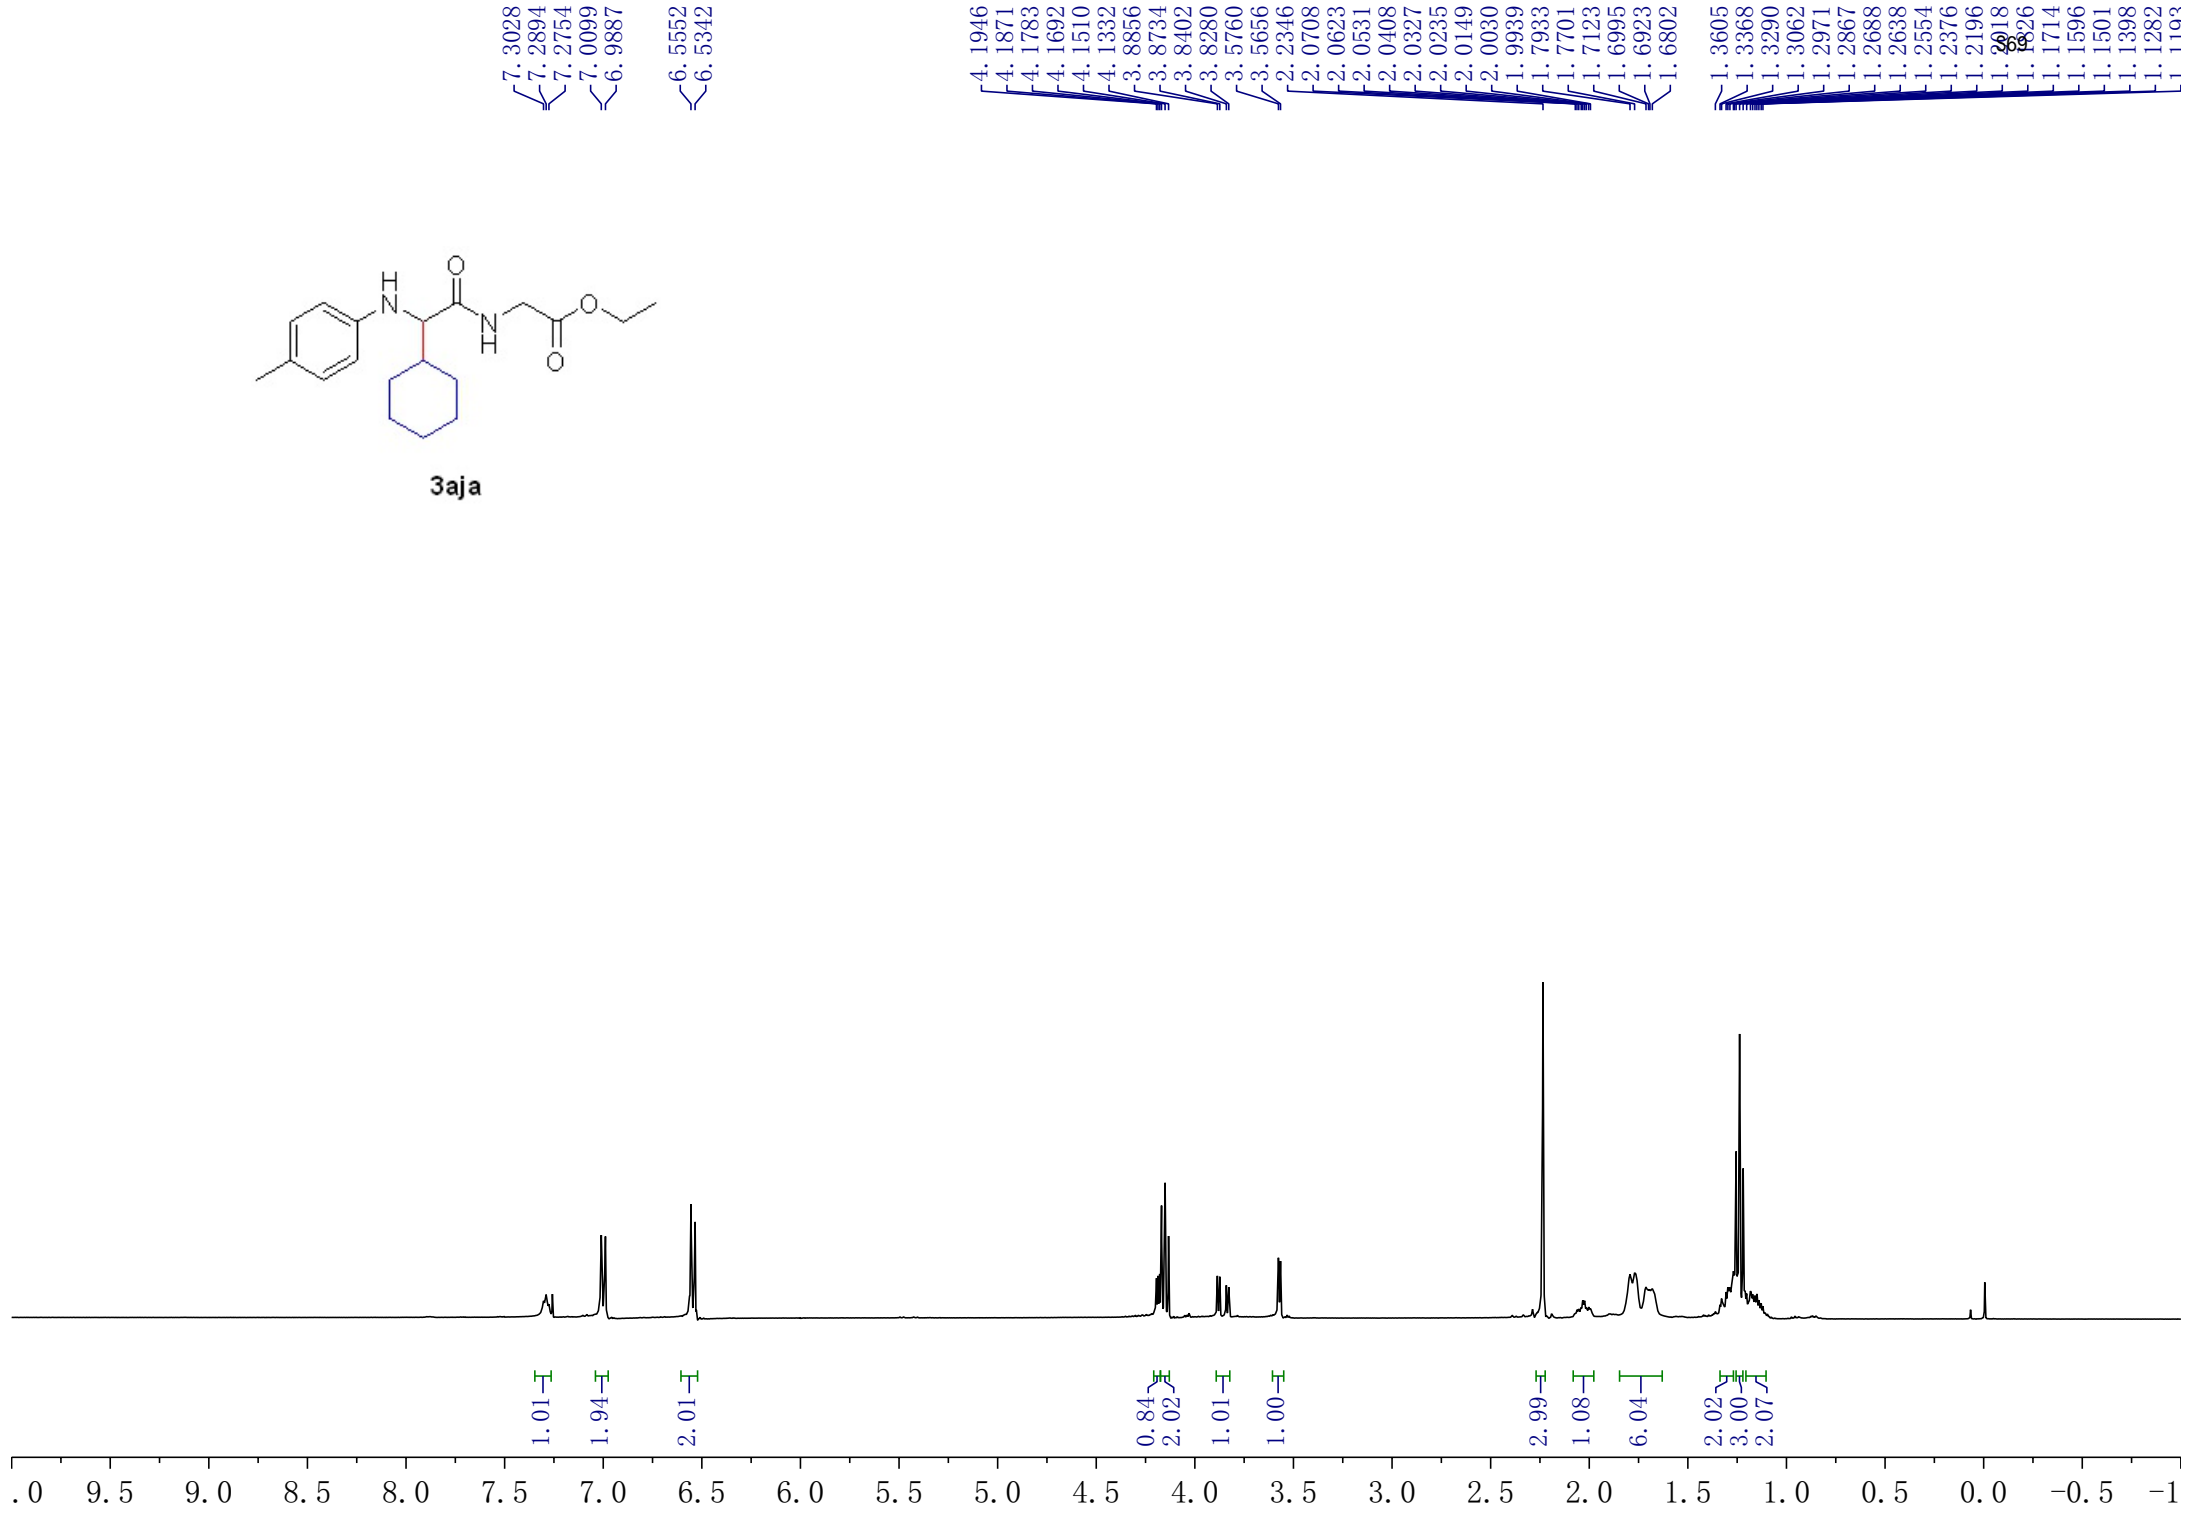

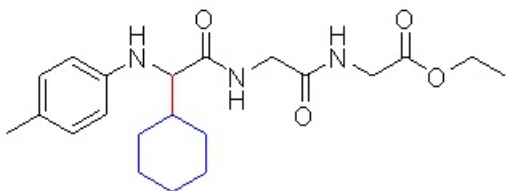

3aka

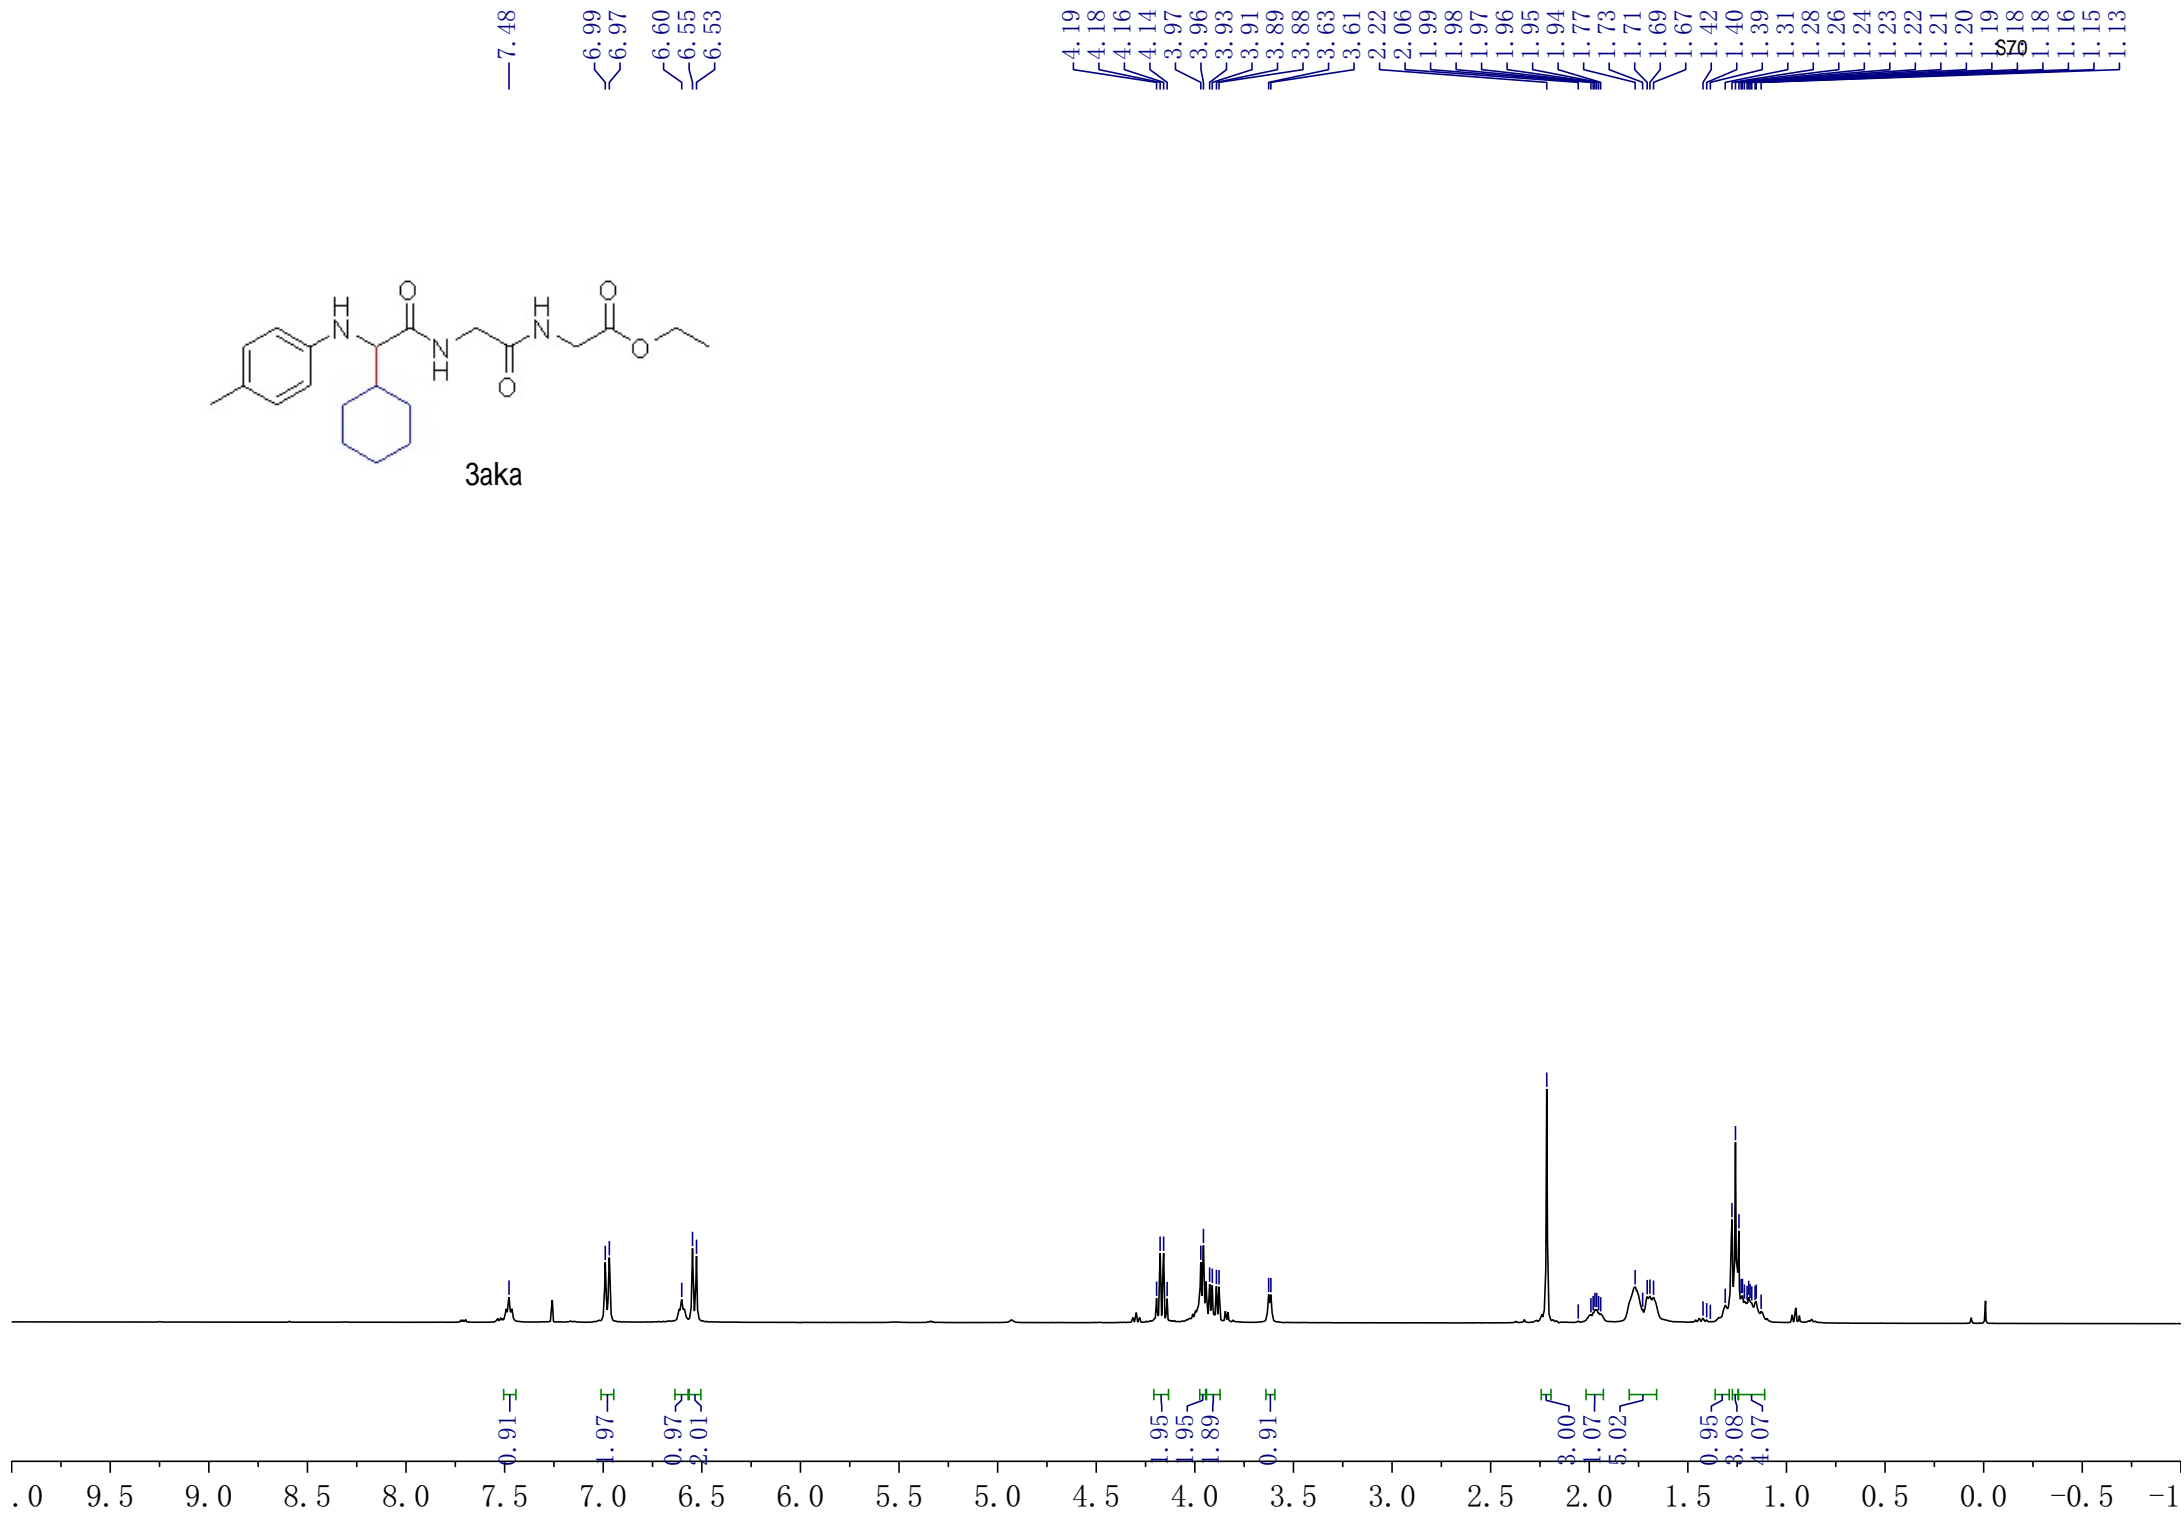

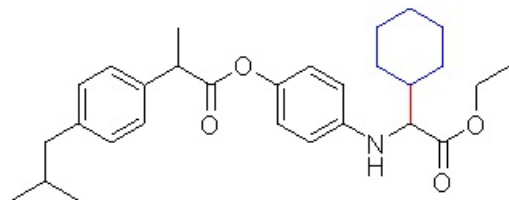

3ala

7.2931  
7.2732  
7.1373  
7.1173  
6.7990  
6.7769  
6.5644  
6.5423

4.1763  
4.1585  
4.1407  
4.1229  
3.9180  
3.9001  
3.8822  
3.8647  
3.7772

2.4712  
2.4535  
1.8751  
1.8581  
1.8414  
1.8249  
1.8084  
1.7429  
1.6792  
1.6488  
1.5833  
1.5655  
1.4515  
1.4347  
1.3112  
1.2943  
1.2507  
1.2329  
1.2151  
1.1844  
1.1469  
1.1156  
0.9144  
0.8980

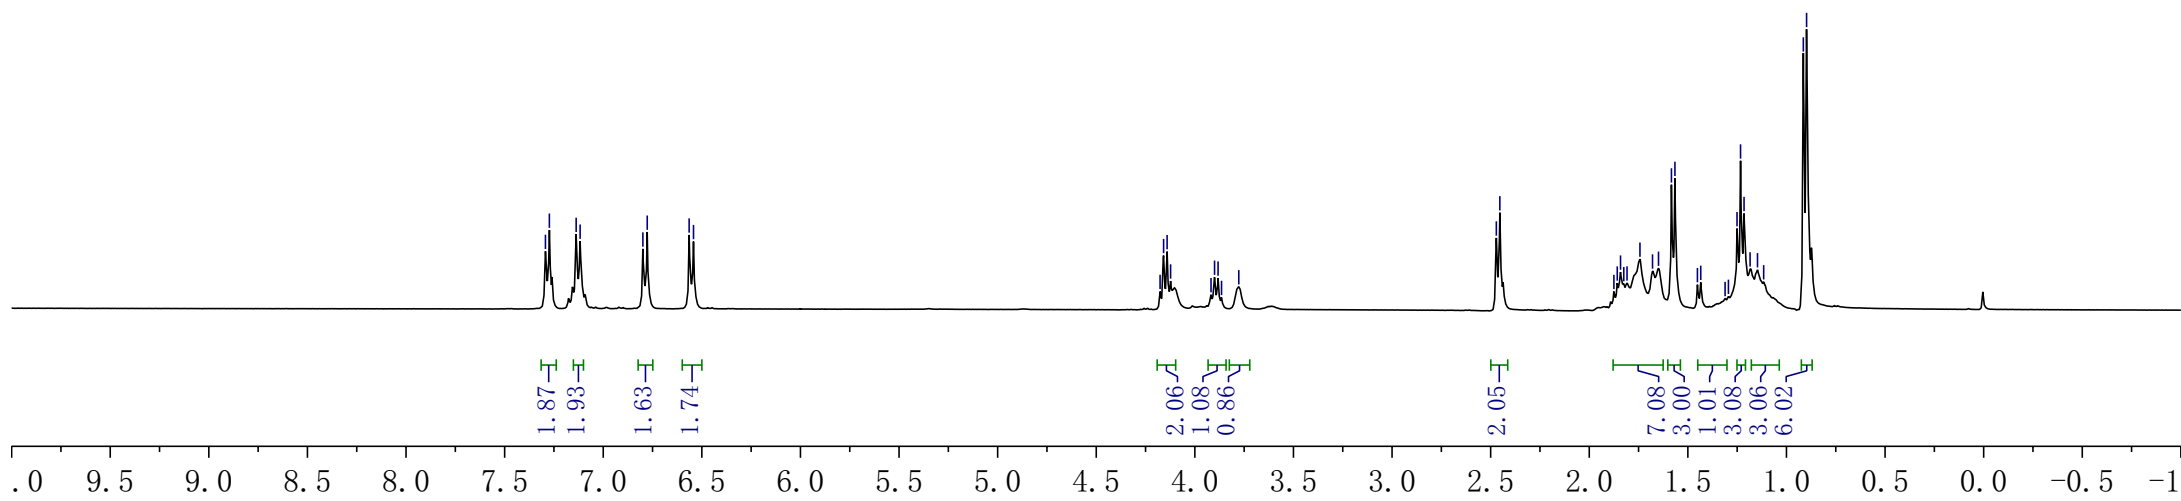

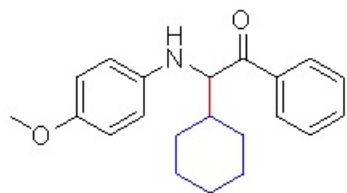

3ama

7.96  
7.95  
7.61  
7.59  
7.57  
7.51  
7.49  
7.47  
6.75  
6.73  
6.69  
6.67

4.77  
4.76

4.39

3.71

1.82  
1.79  
1.76  
1.72  
1.71  
1.60  
1.45  
1.44  
1.42  
1.41  
1.39  
1.38  
1.36  
1.35  
1.26  
1.25  
1.22  
1.21  
1.19  
1.15  
1.12  
1.10  
1.08

S72

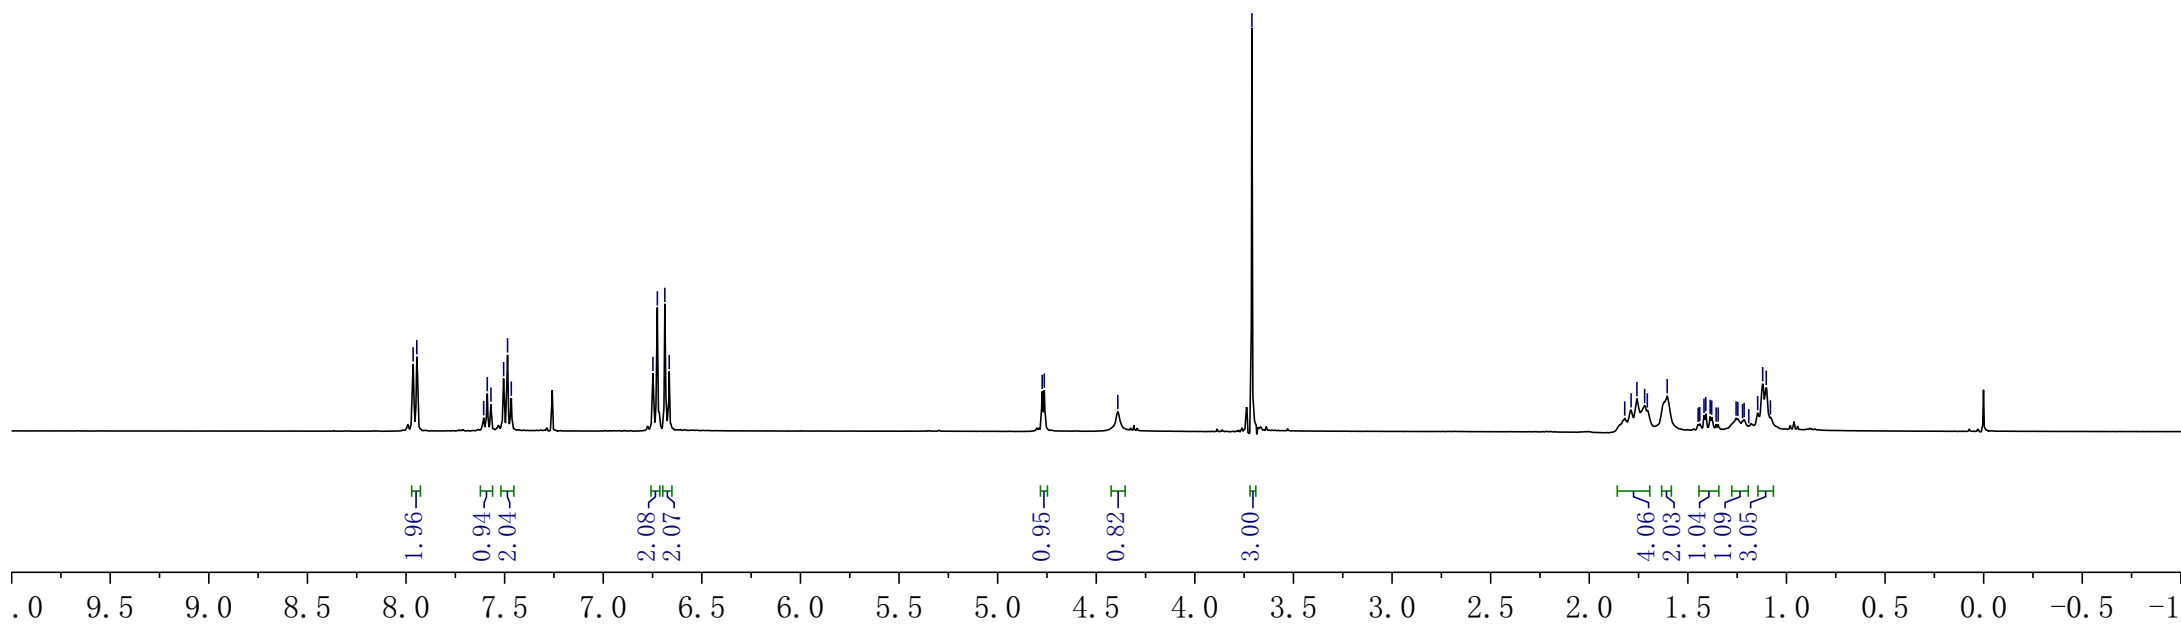



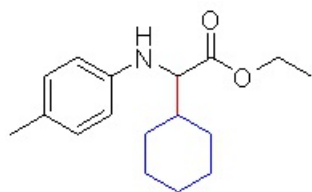

3aa

—173.80

—145.17

—129.71

—127.29

—113.71

—62.44

—60.68

—41.31

—29.61

—29.18

—26.19

—26.09

—26.05

—20.33

—14.28

S73

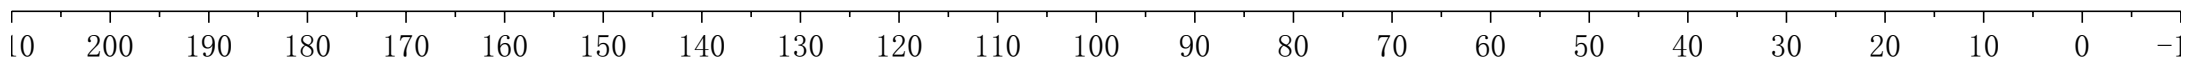

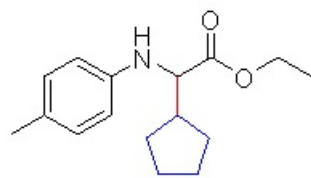

**3ab**

—174.29

—145.05

—129.71

—127.41

—113.66

—61.25

—60.69

—43.19

—29.36

—29.03

—25.33

—25.10

—20.35

—14.26

S74



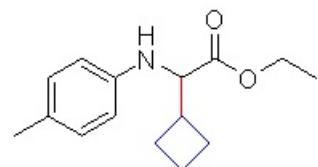

**3ac**

—173.52

—145.05

—129.71

—127.46

—113.68

—61.48  
—60.74

—38.37

—25.41

—24.75

—20.36

—18.06

—14.31

S75

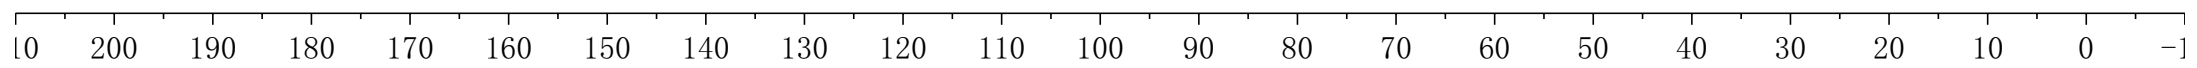

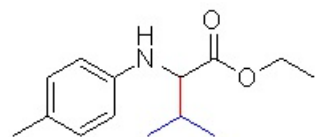

3ad

—173.78

—145.11

—129.74

—127.38

—113.81

—62.89

—60.73

—31.53

—20.35

—19.07

—18.68

—14.29



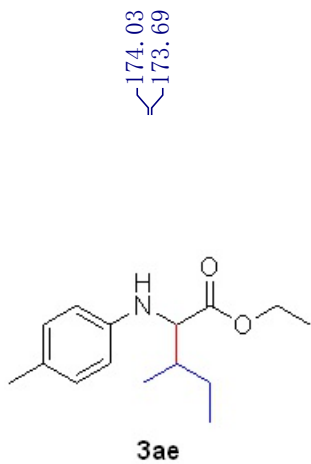

174.03  
173.69

145.23  
144.94

129.74  
129.73  
127.38  
127.32

113.83  
113.73

61.56  
61.18  
60.74  
60.69

38.01  
37.92

26.17  
25.67  
20.35  
15.46  
14.96  
14.28  
14.27  
11.70  
11.79

10 200 190 180 170 160 150 140 130 120 110 100 90 80 70 60 50 40 30 20 10 0 -1

1.00

0.31

5.21  
0.84

5.67

3.08  
2.94

3.18

2.85

3.33  
3.26  
2.88

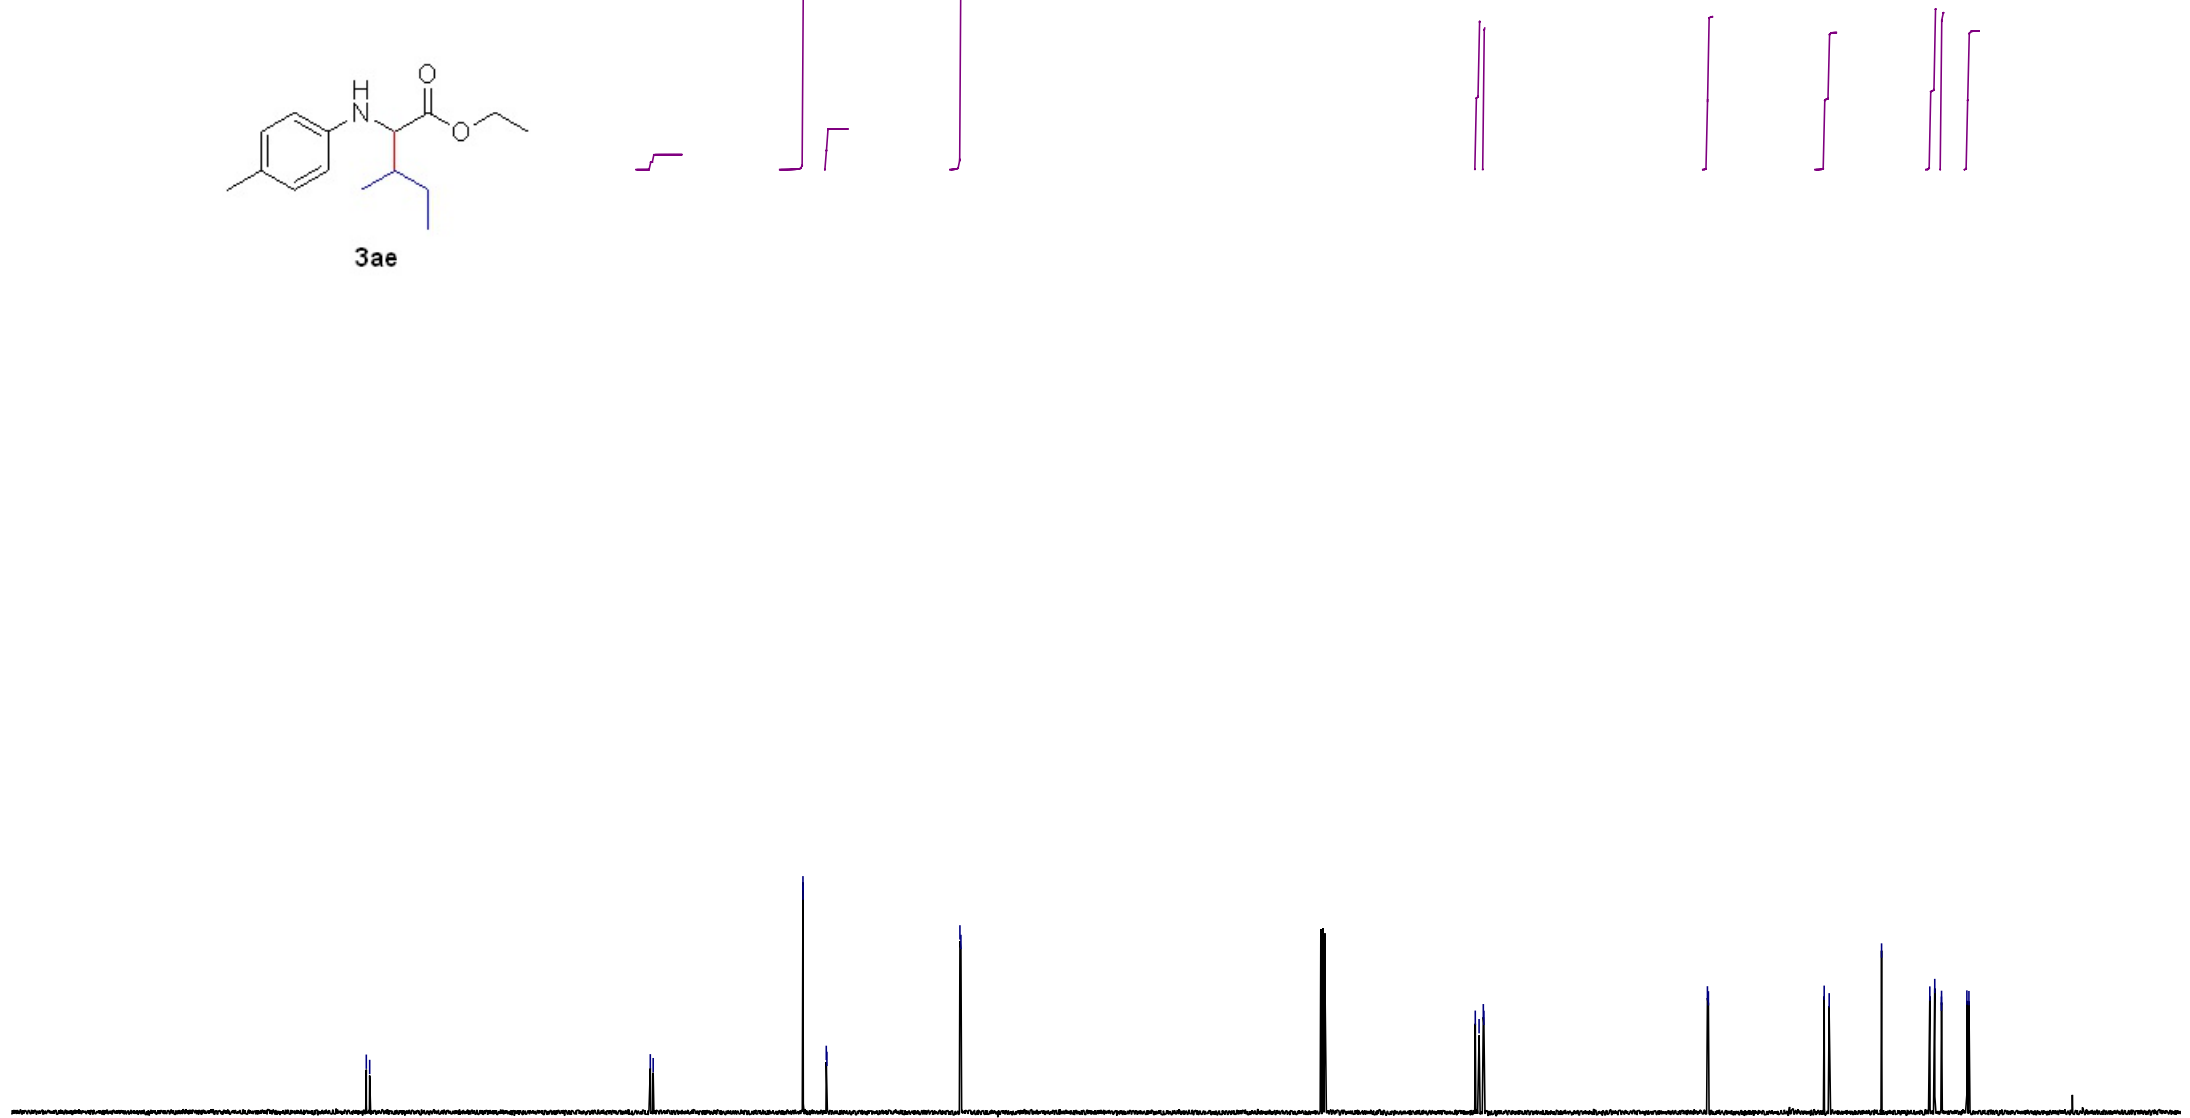

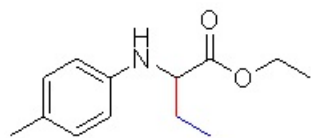

3af

—174.14

—144.61

—129.75

—127.38

—113.66

—60.87

—58.16

—26.11

—20.36

—14.24

—9.89

578



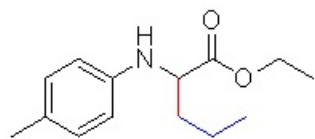

3ag

—174.40

—144.62

—129.75

—127.46

—113.67

—60.86

—56.86

—35.22

—20.36

—18.87

—14.23

—13.80

S79

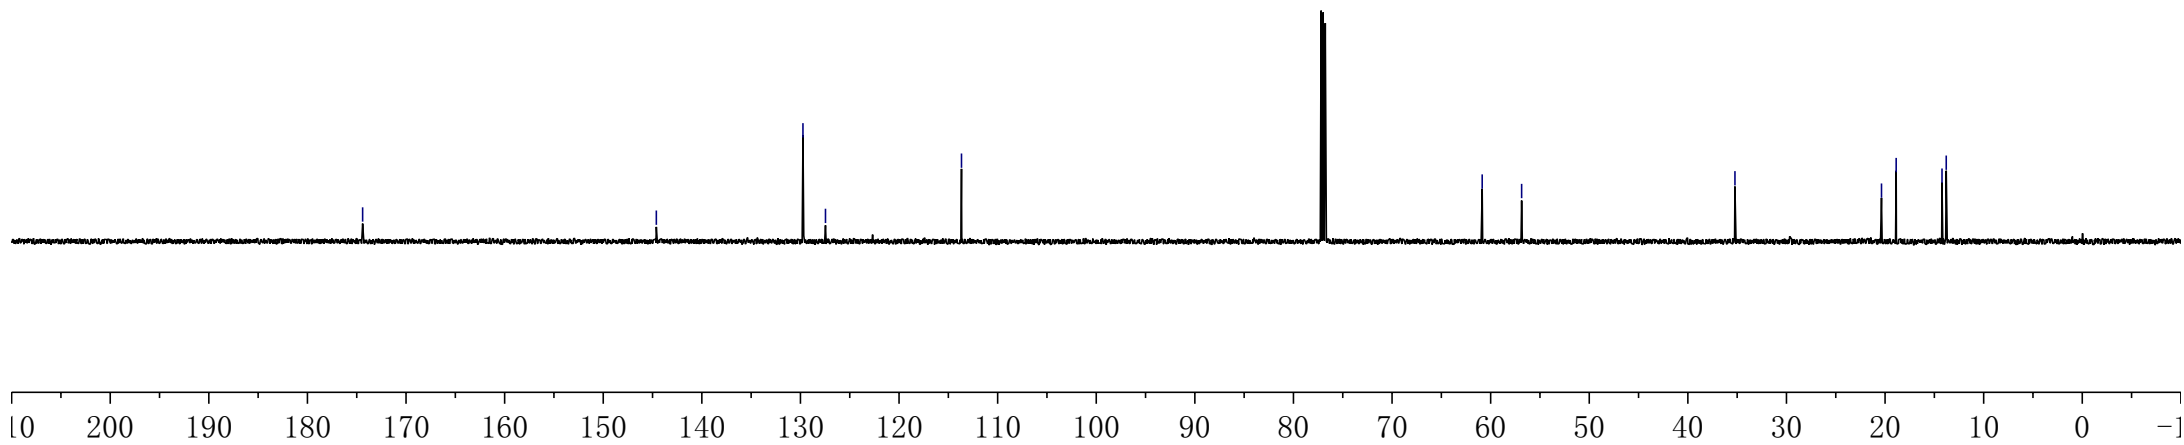

$^{13}\text{C}$  NMR (151 MHz,  $\text{cdCl}_3$ )  $\delta$  174.41, 144.69, 129.75, 127.39, 113.65, 60.84, 57.03, 32.85, 27.71, 22.43, 20.36, 14.24, 13.88.

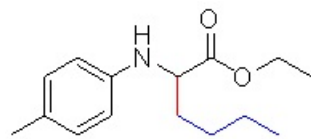

**3ah**

—60.84  
—57.03

—32.85

—27.71

—22.43

—20.36

—14.24  
—13.88

S80

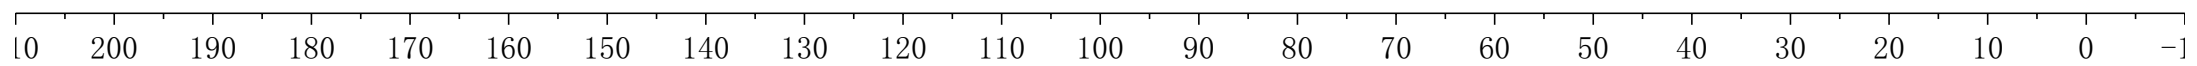



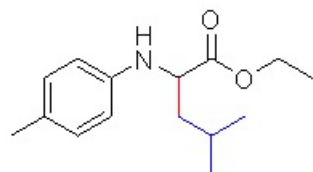

**3ai**

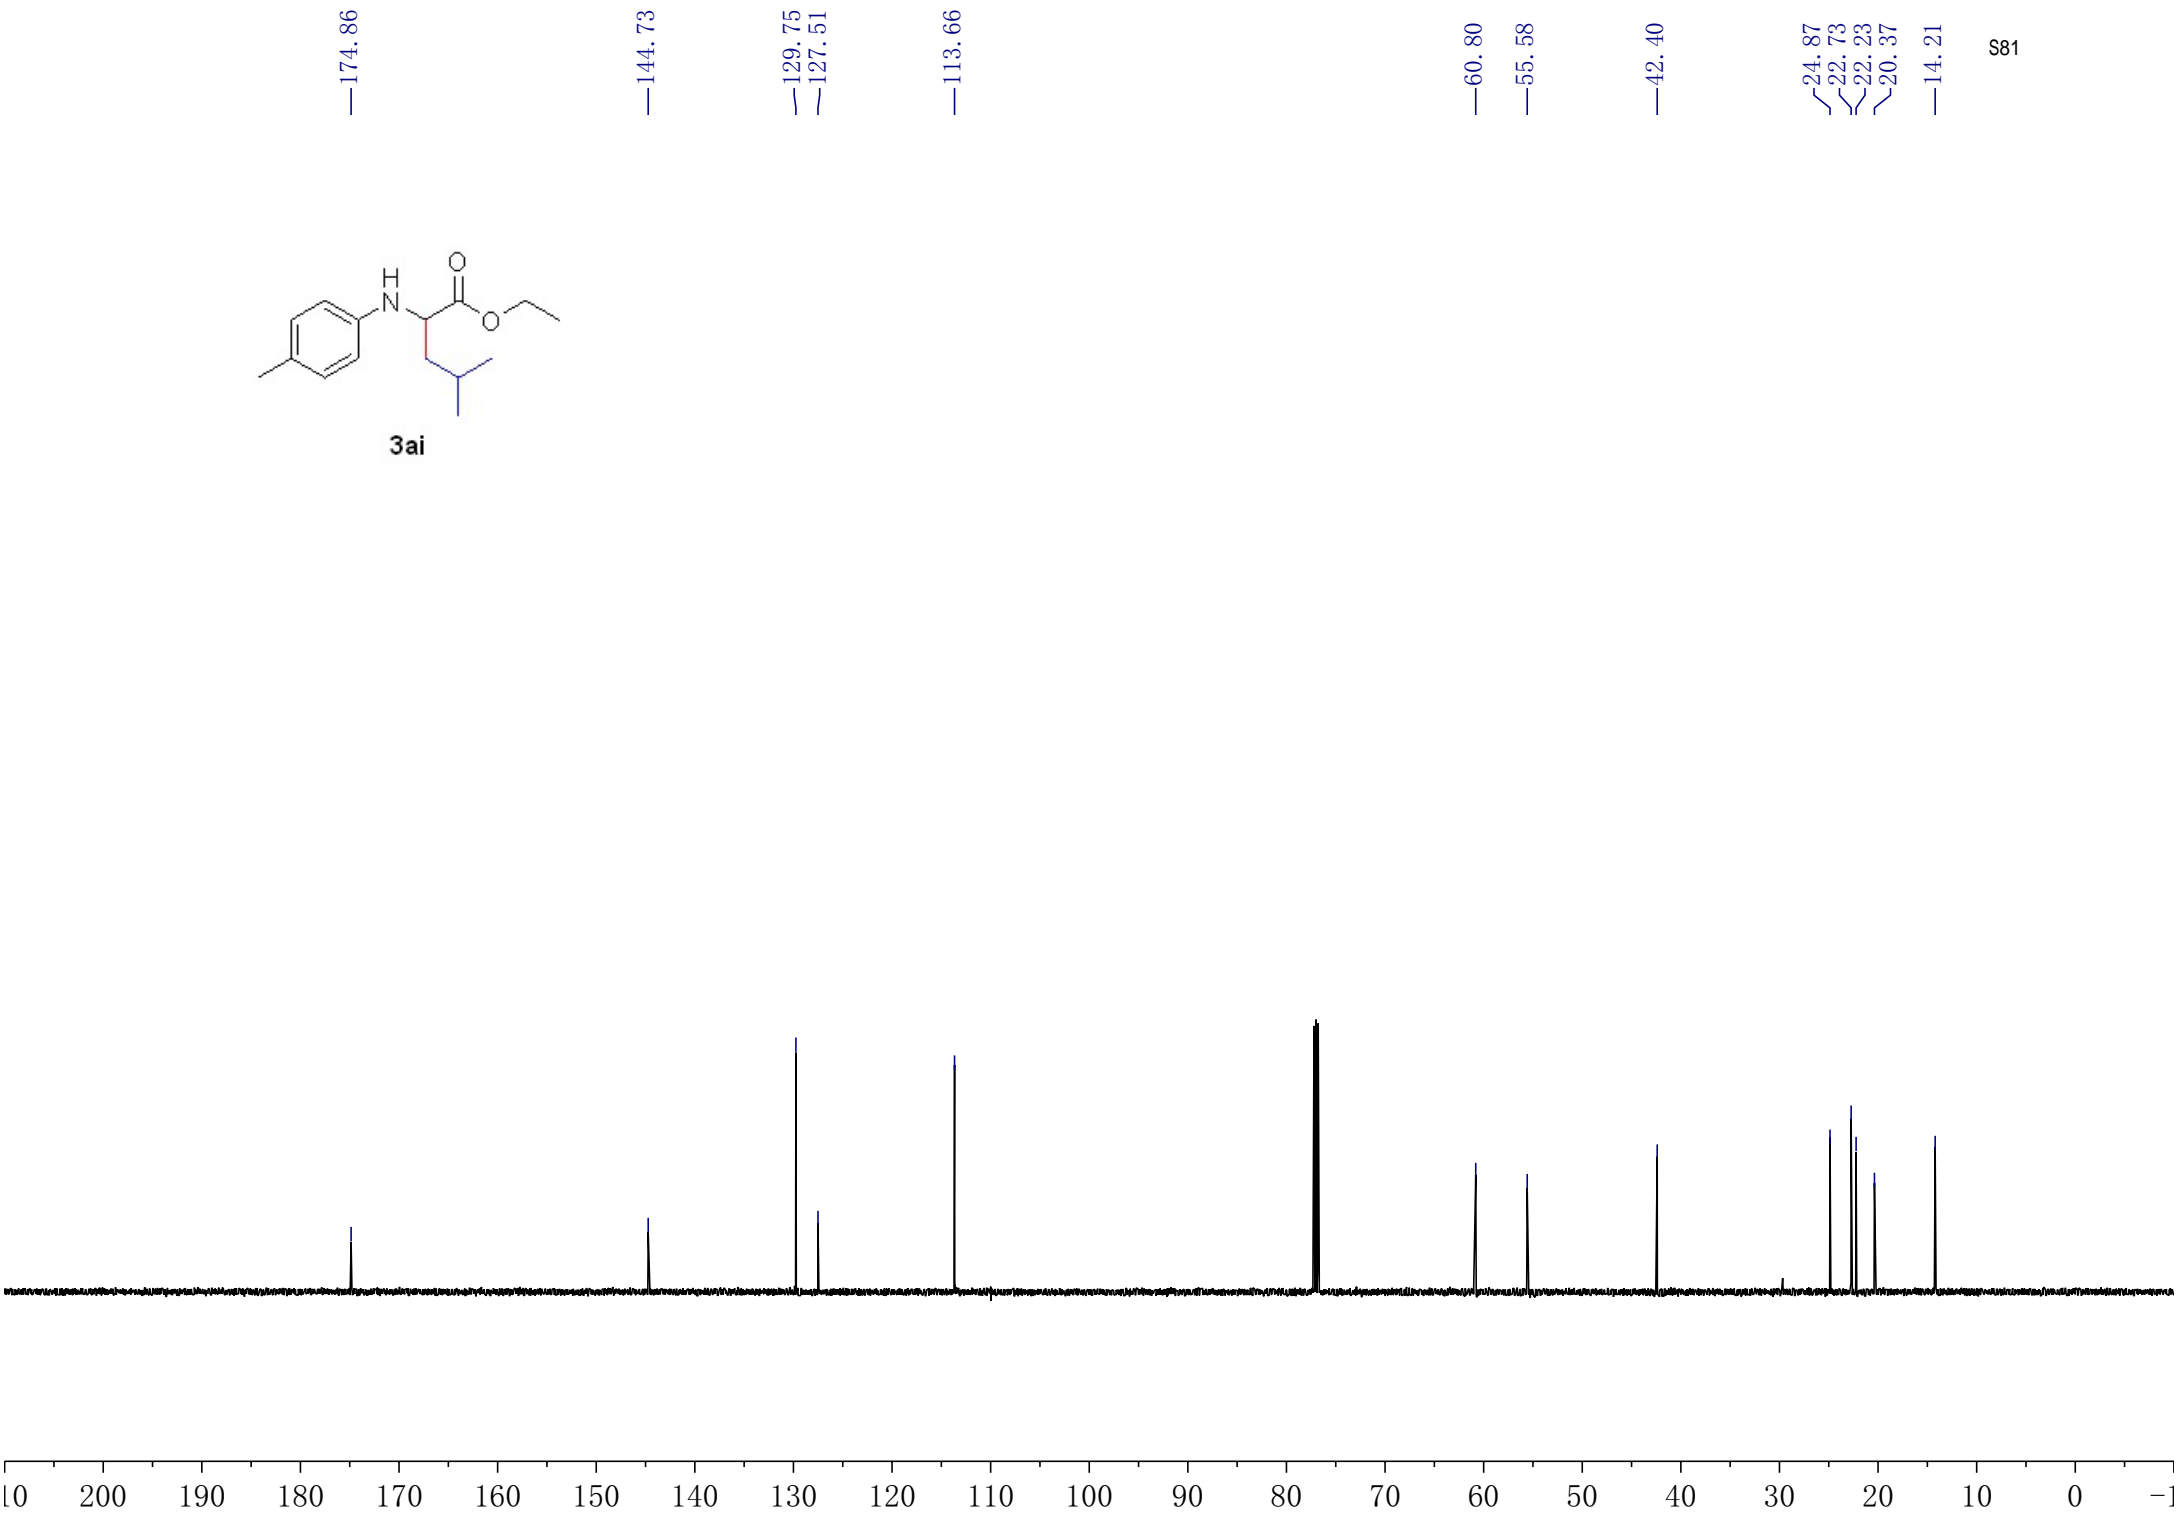

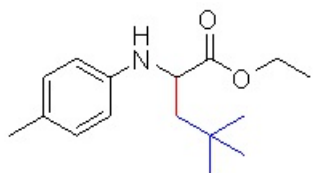

3aj

—175.13

—144.45

—129.74  
—127.48

—113.68

—60.80

—54.85

—47.03

—30.67  
—29.81

—20.37

—14.13

882

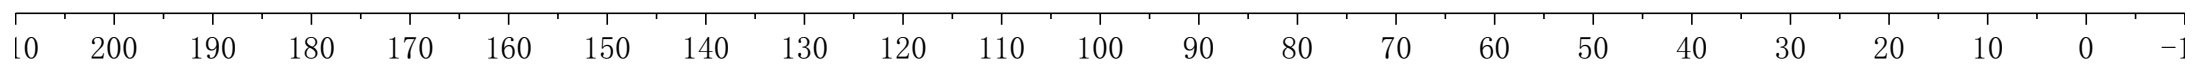

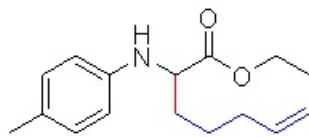

**3ak**

—174.29

—144.62

—138.06

—129.76

—127.46

—114.99

—113.66

—60.92

—56.93

—33.33

—32.54

—24.83

—20.37

—14.24

583

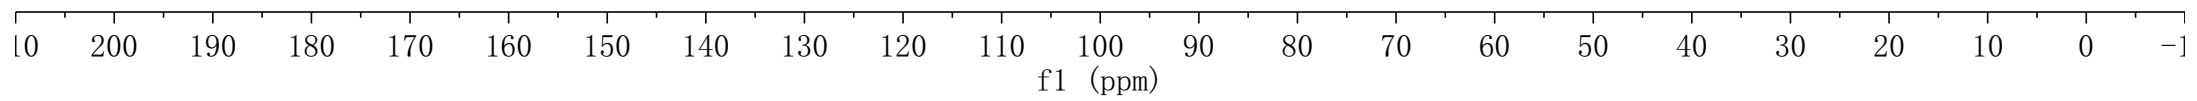

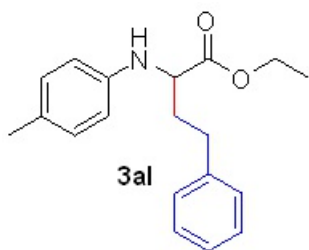

—174.13

—144.54

—140.97

129.77

128.49

128.44

127.60

126.09

—113.78

—61.02

—56.50

—34.69

—31.81

—20.37

—14.24

884



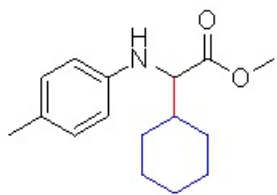

3ba

—174.37

—145.09

—129.77

—127.38

—113.65

—62.44

—51.73

—41.31

29.65

29.22

26.17

26.07

26.04

—20.35



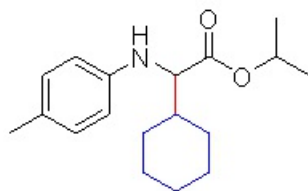

**3ca**

—173.29

—145.24

—129.67

—127.20

—113.75

—68.27

—62.46

—41.29

29.56

29.18

26.24

26.13

26.08

21.90

21.85

20.35



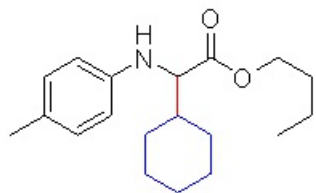

3da

—173.95

—145.19

—129.71

—127.29

—113.72

—64.58

—62.51

—41.31

30.63

29.64

29.20

26.20

26.09

26.06

20.34

19.08

—13.60



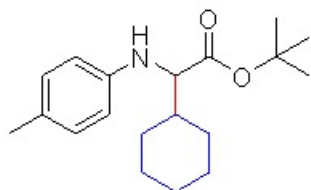

3ea

—172.97

—145.37

—129.63

—127.01

—113.72

—81.28

—62.82

—41.32

—29.53

—29.14

—28.10

—26.28

—26.18

—26.11

—20.35

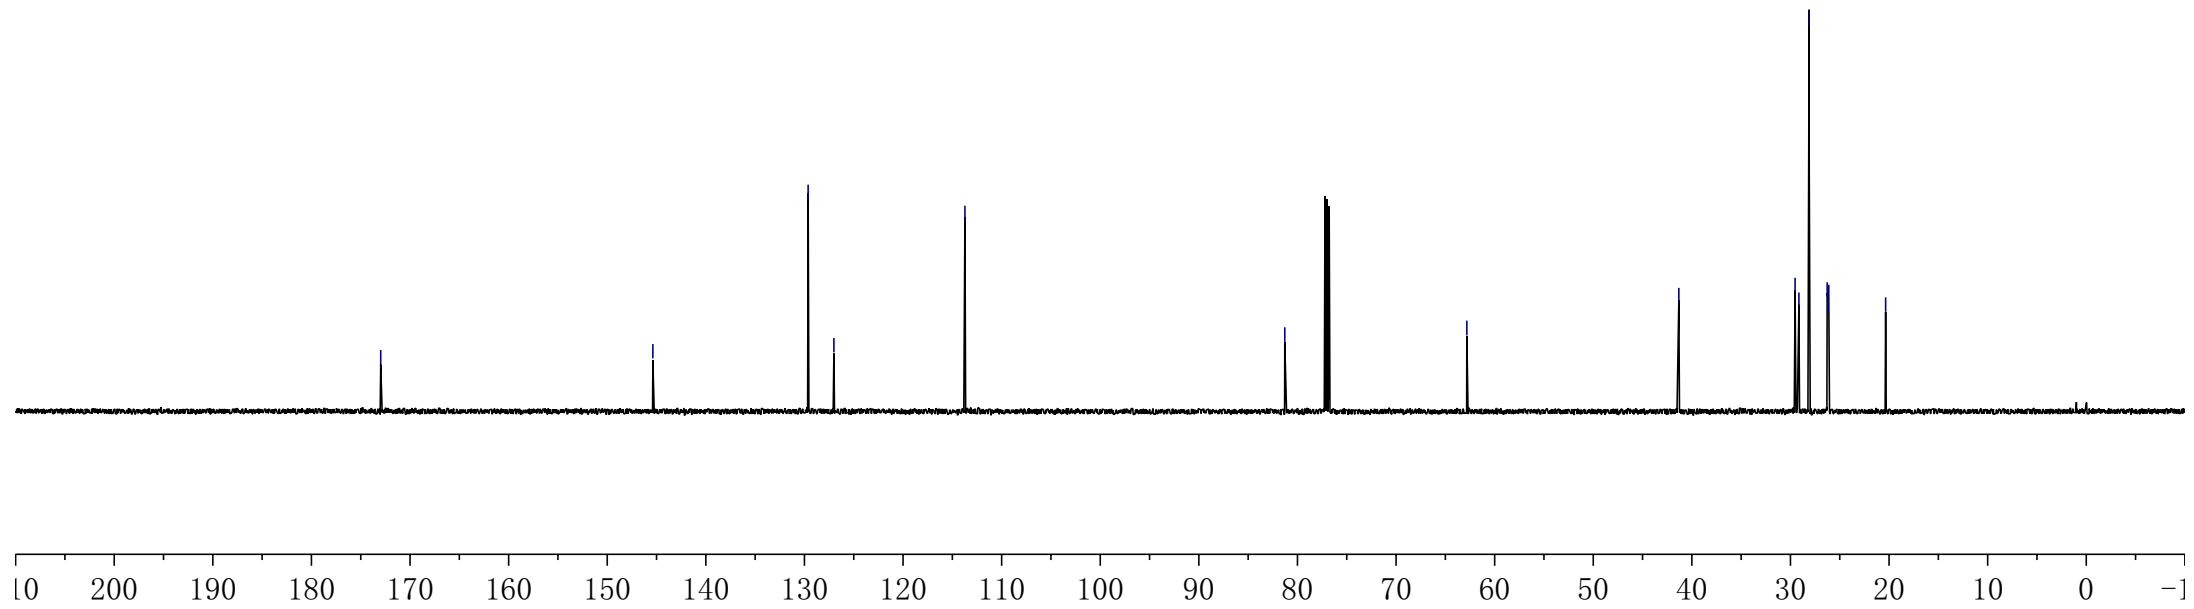



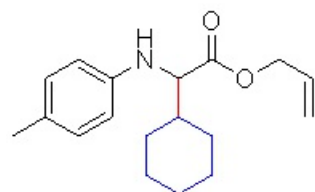

3fa

—173.54

—145.09

—131.89

—129.74

—127.40

—118.58

—113.72

—65.34

—62.47

—41.32

—29.66

—29.14

—26.17

—26.06

—26.03

—20.35



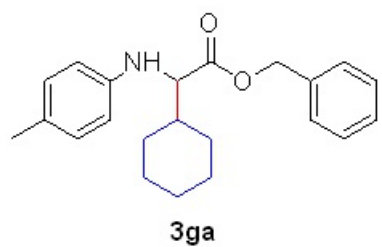

—174.05  
—145.38  
—135.89  
—130.05  
—128.77  
—128.55  
—128.52  
—127.70

—114.07

—66.82  
—62.78

—41.57

—29.91  
—29.42  
—26.43  
—26.32  
—26.30  
—20.67

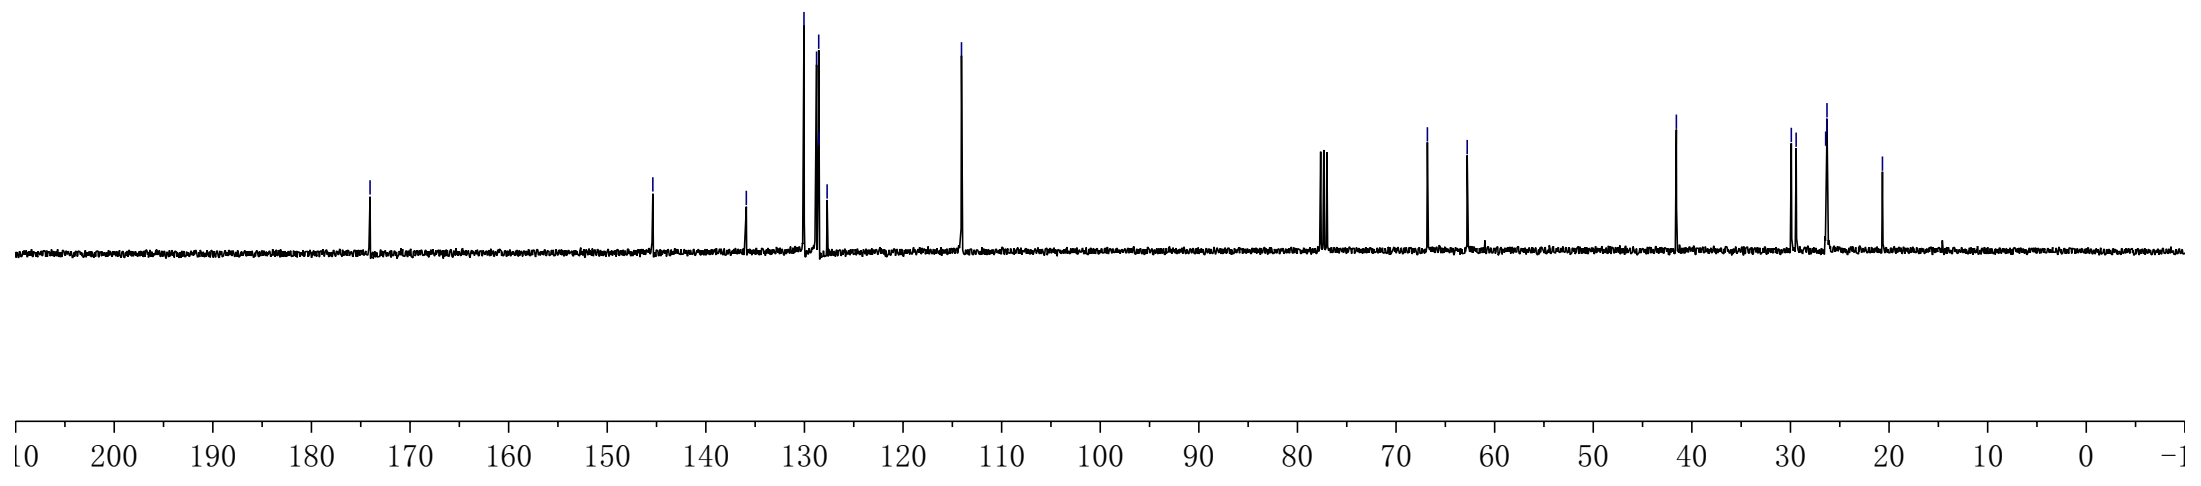

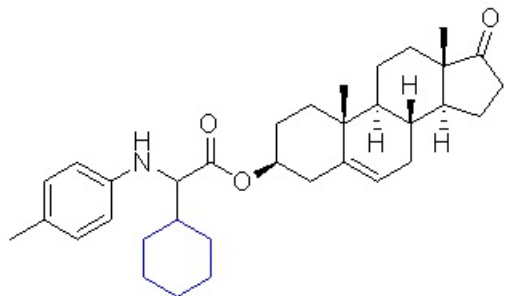

3ha

—173.15

—145.20

<139.71

<139.69

<129.69

<129.68

<127.24

<127.22

—122.00

<113.74

<113.71

—74.17

<62.48

<62.44

~51.66

~50.09

~47.48

~41.29

<38.07

<38.06

<36.84

<36.69

<35.81

<31.43

<31.38

<30.74

<29.58

<29.22

<27.78

<27.77

<26.82

<26.81

<26.11

<26.06

<21.85

<20.36

<20.30

<19.33

<13.59

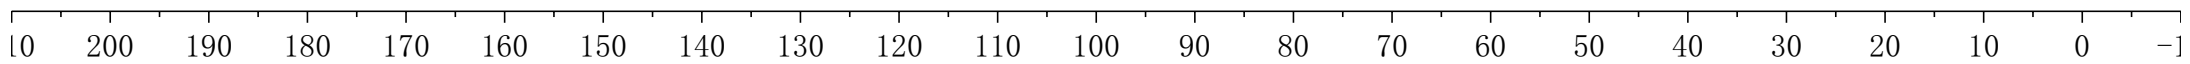

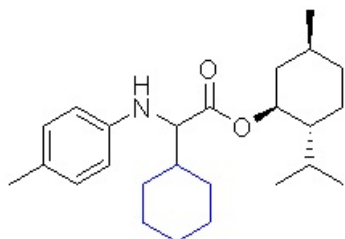

3ia

—173.46

—145.18

—129.60

—127.37

—114.11

—74.90

—62.80

—46.92

41.27

40.75

34.20

31.37

29.62

29.36

26.28

26.09

26.03

25.93

23.06

21.99

20.80

20.36

15.36



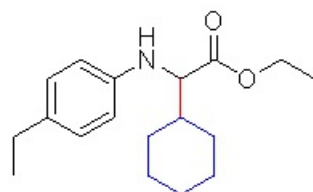

3ja

—173.68

—145.44

—133.93

—128.47

—113.77

—62.49  
—60.57

—41.40

29.62  
29.18  
27.84  
26.21  
26.09  
26.06

15.66  
14.21



$^{13}\text{C}$  NMR (151 MHz,  $\text{cdCl}_3$ )  $\delta$  173.86, 145.45, 138.53, 127.09, 113.52, 62.32, 60.70, 41.36, 33.13, 29.64, 29.15, 26.20, 26.10, 26.07, 24.18, 24.17, 14.29.

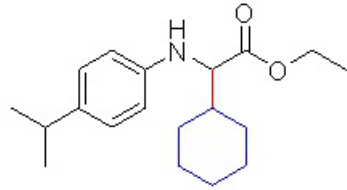

**3ka**

— 173.86

— 145.45

— 138.53

— 127.09

— 113.52

— 62.32

— 60.70

— 41.36

— 33.13

— 29.64

— 29.15

— 26.20

— 26.10

— 26.07

— 24.18

— 24.17

— 14.29

S94

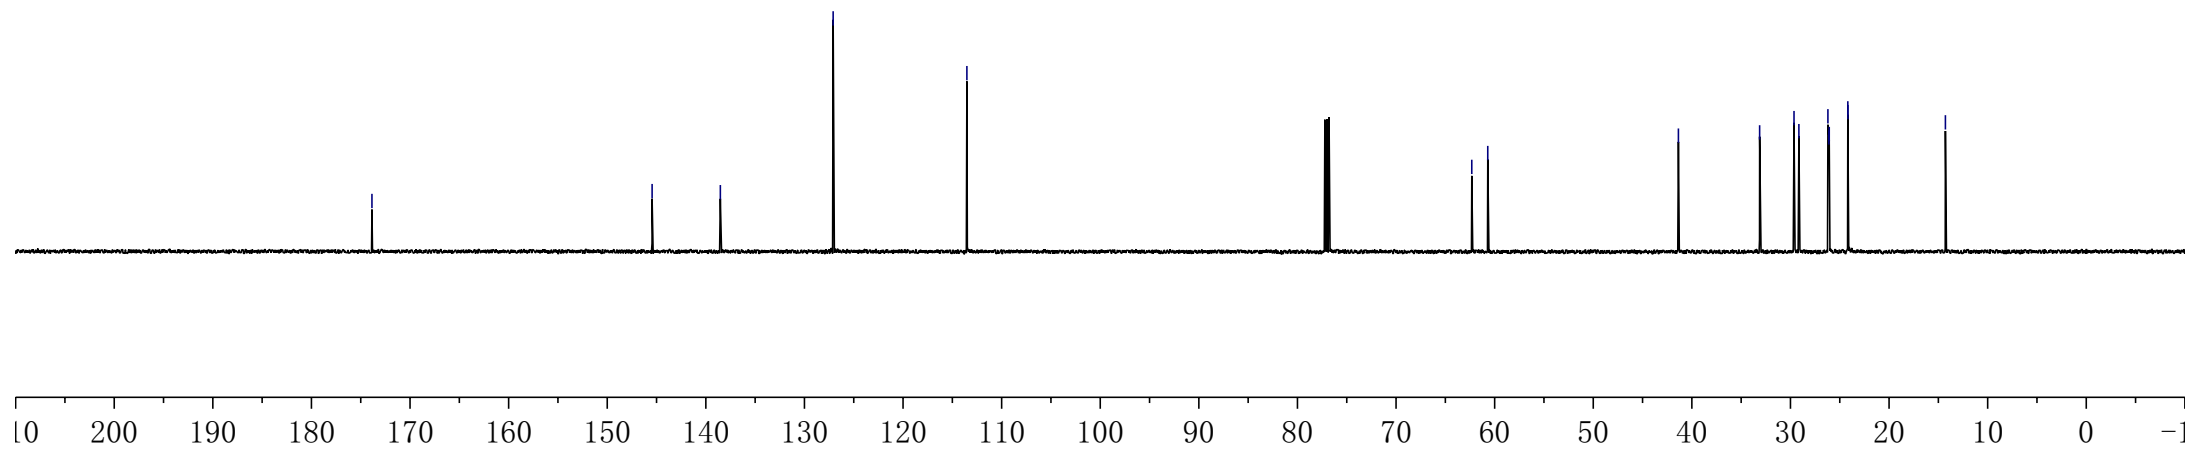

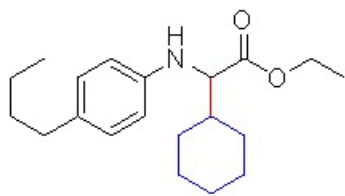

3la

—173.86

—145.33

—132.53

—129.09

—113.58

—62.39

—60.69

—41.33

34.67

33.90

29.62

29.16

26.19

26.09

26.06

22.30

14.28

13.95

S95

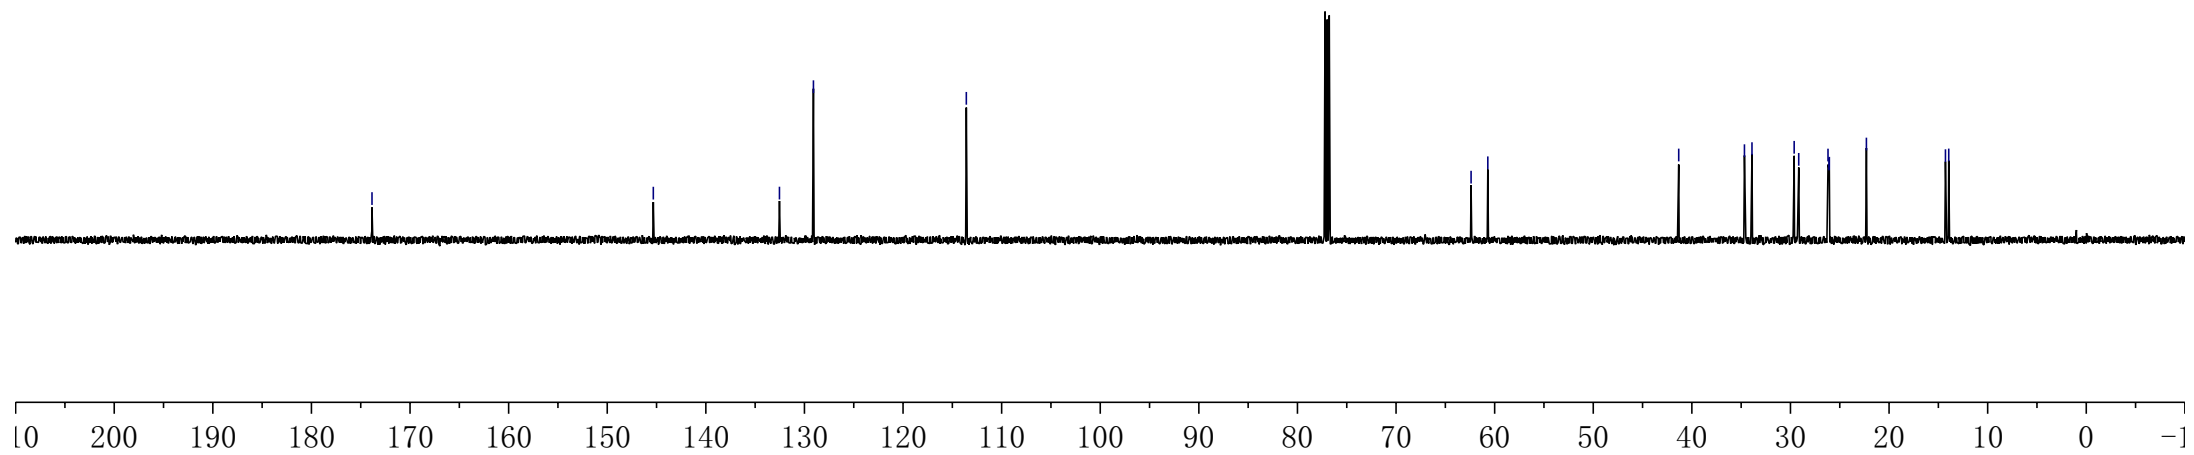

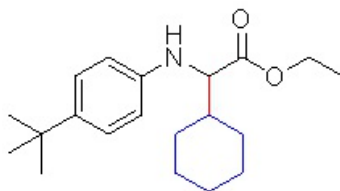

3ma

—173.70

—145.10

—140.84

—125.94

—113.30

—62.35

—60.59

—41.44

33.79

31.45

29.64

29.15

26.21

26.10

26.06

—14.21





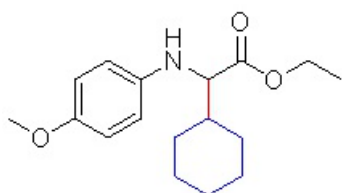

3na

—173.97

—152.58

—141.64

115.16  
114.81

63.37  
60.66  
55.69

—41.29

29.66  
29.20  
26.20  
26.09  
26.06

—14.29

S97



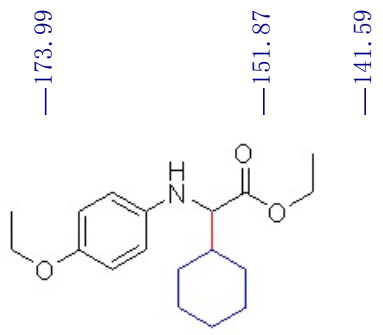

3oa

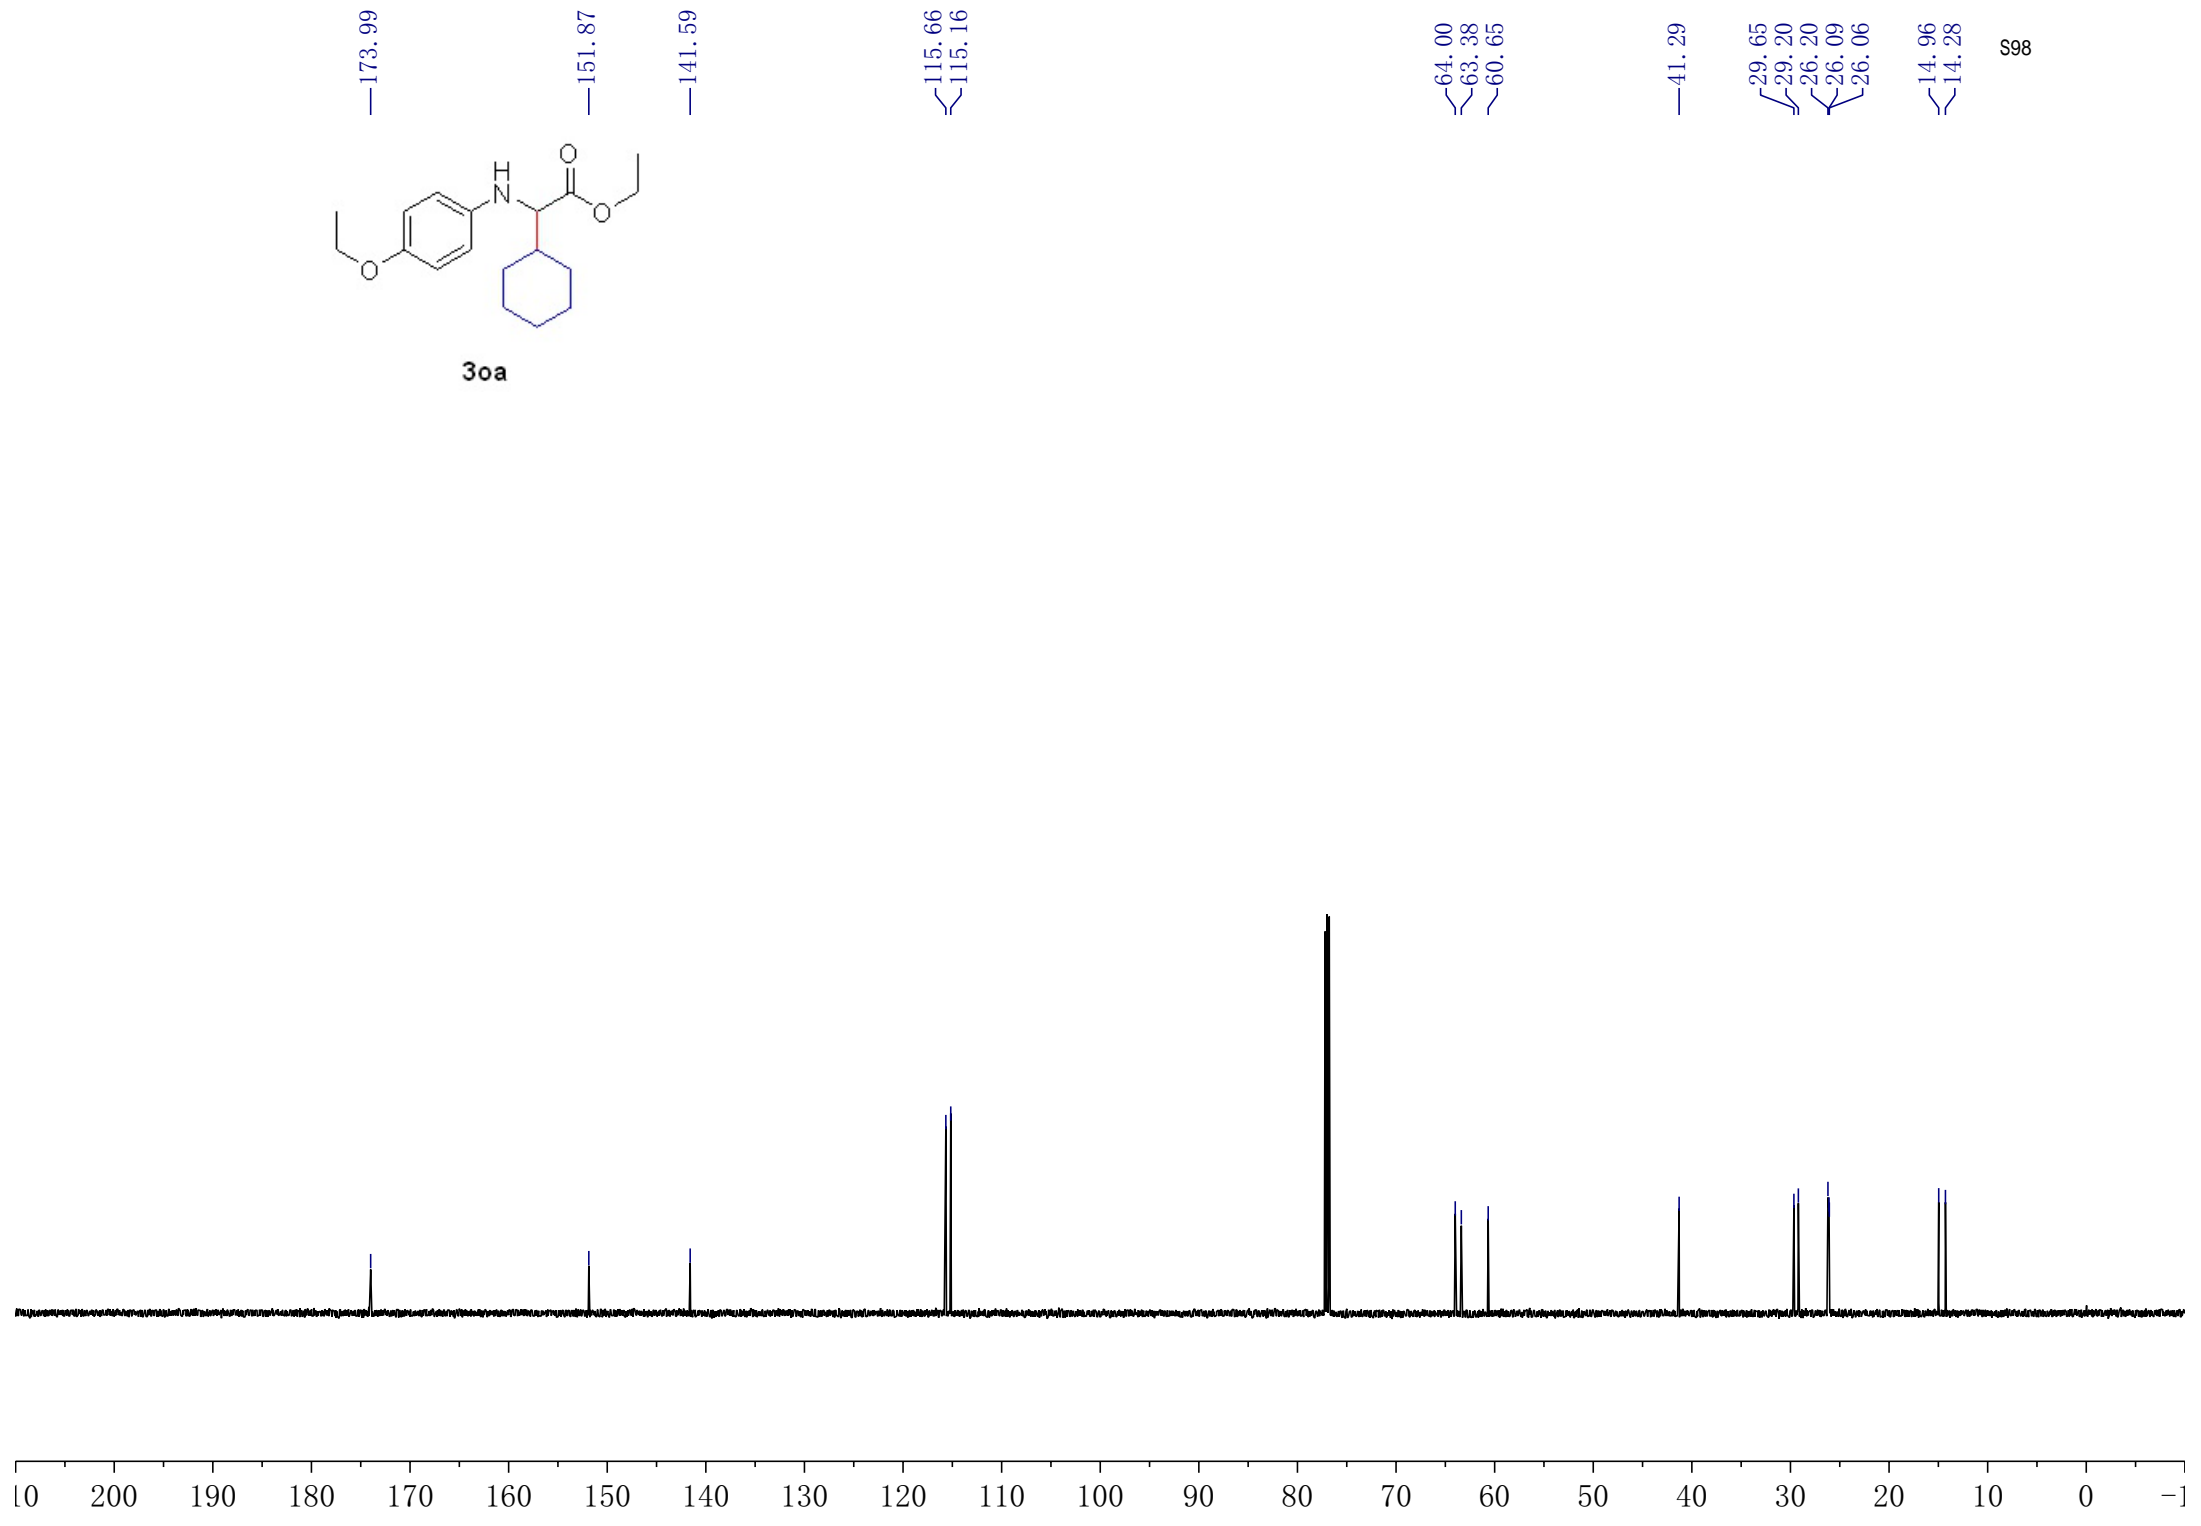

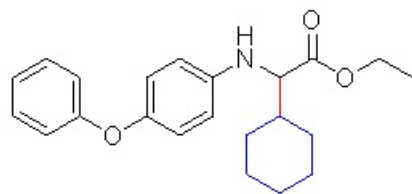

3pa

—173.73

—158.88

—148.26

—144.04

—129.45

—121.99

—121.07

—117.21

—114.71

—62.78

—60.80

—41.30

—29.65

—29.18

—26.18

—26.08

—26.05

—14.31



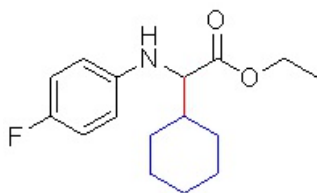

3qa

—173.48  
—157.03  
—155.47  
—143.87

115.66  
115.51  
114.75  
114.70

—63.07  
—60.68

—41.30

29.62  
29.17  
26.16  
26.04  
26.01

—14.19

S100

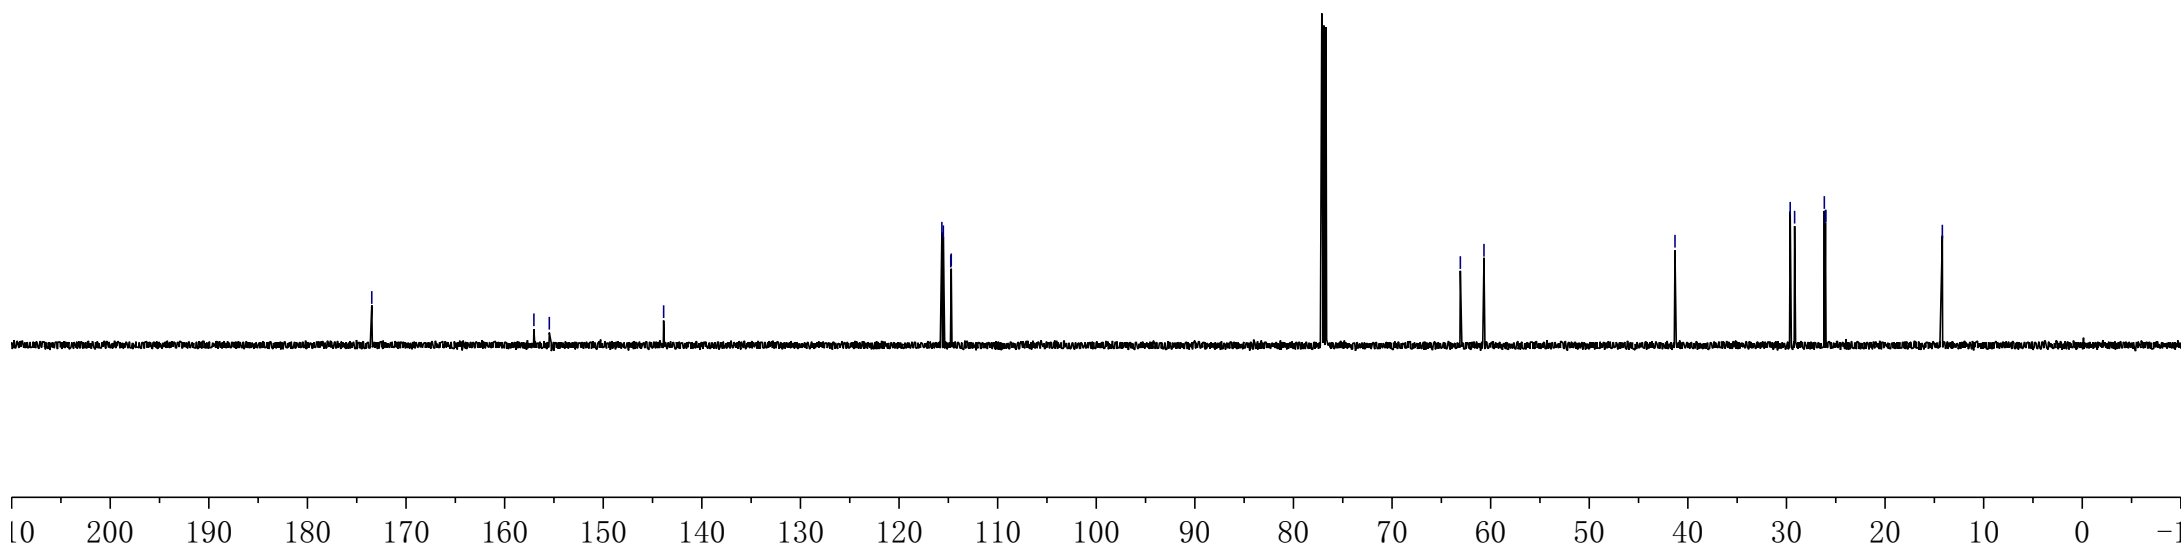

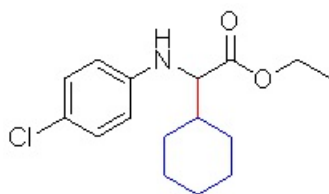

3ra

—173.32

—146.04

—129.06

—122.65

—114.61

—62.16  
—60.89

—41.21

—29.57  
—29.14

—26.13  
—26.03  
—26.00

—14.28

S101

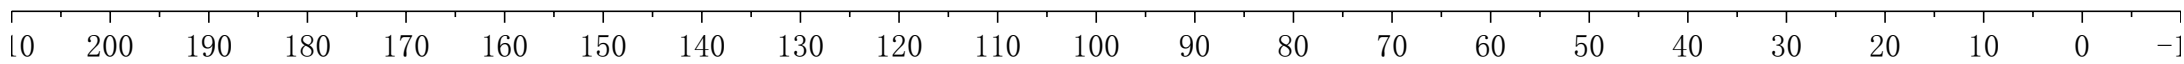

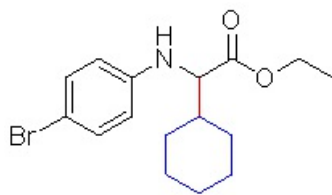

**3sa**

—173.27

—146.45

—131.94

—115.06

—109.67

62.01  
60.92

—41.19

29.55  
29.13  
26.12  
26.03  
25.99

—14.28

S102

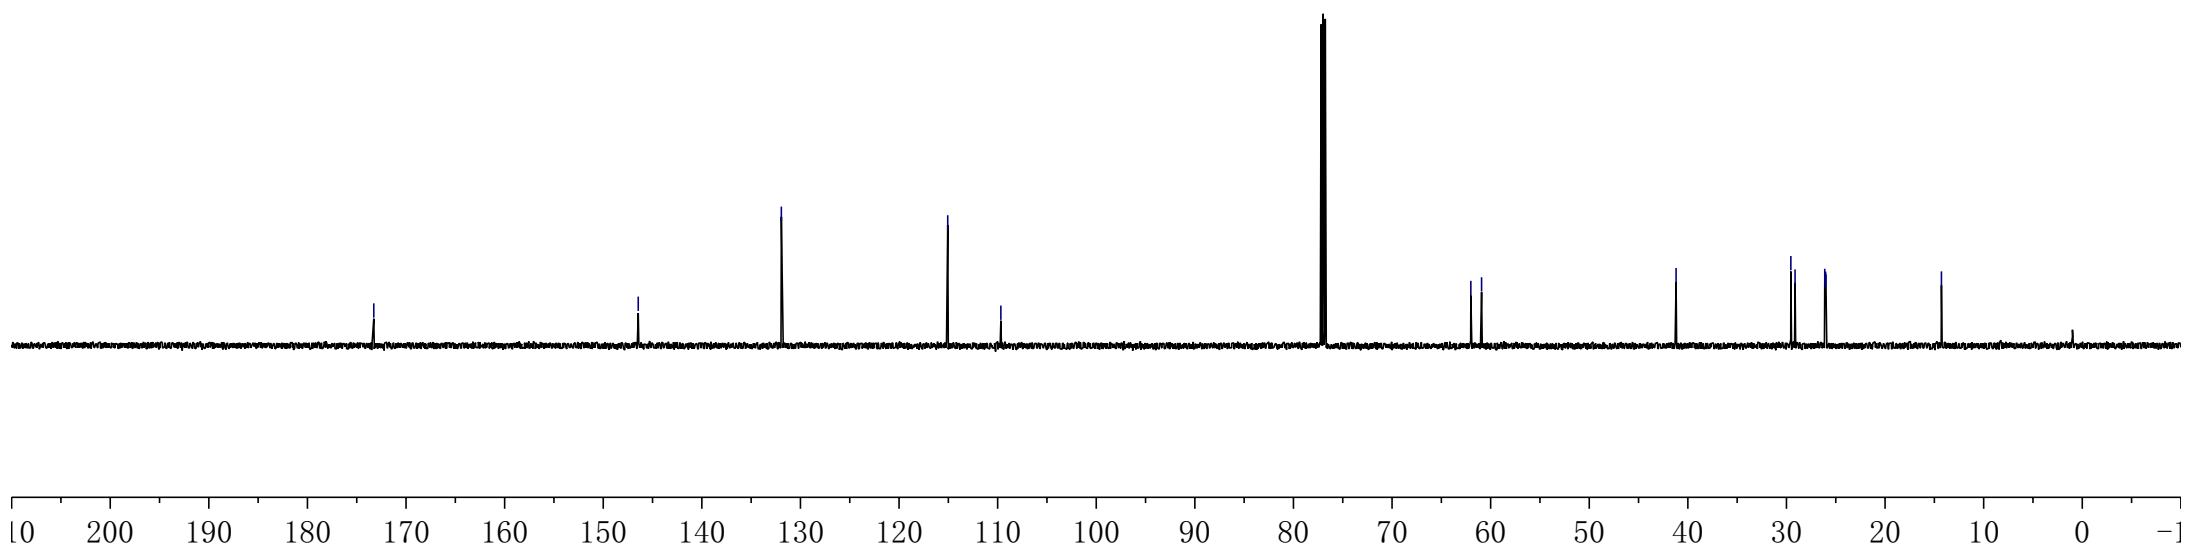

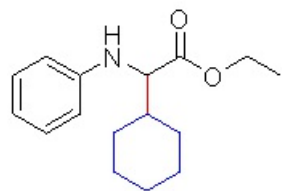

**3ta**

—173.65

—147.44

—129.23

—118.04

—113.49

—62.01

—60.77

—41.30

—29.59

—29.18

—26.18

—26.09

—26.04

—14.28

S103



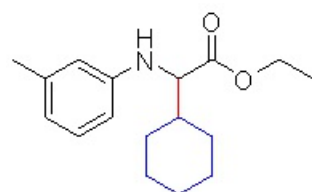

3ua

—173.71

—147.47

—139.00

—129.10

—118.99

—114.37

—110.53

—61.99

—60.72

—41.33

—29.61

—29.17

—26.19

—26.09

—26.04

—21.56

—14.29

S104

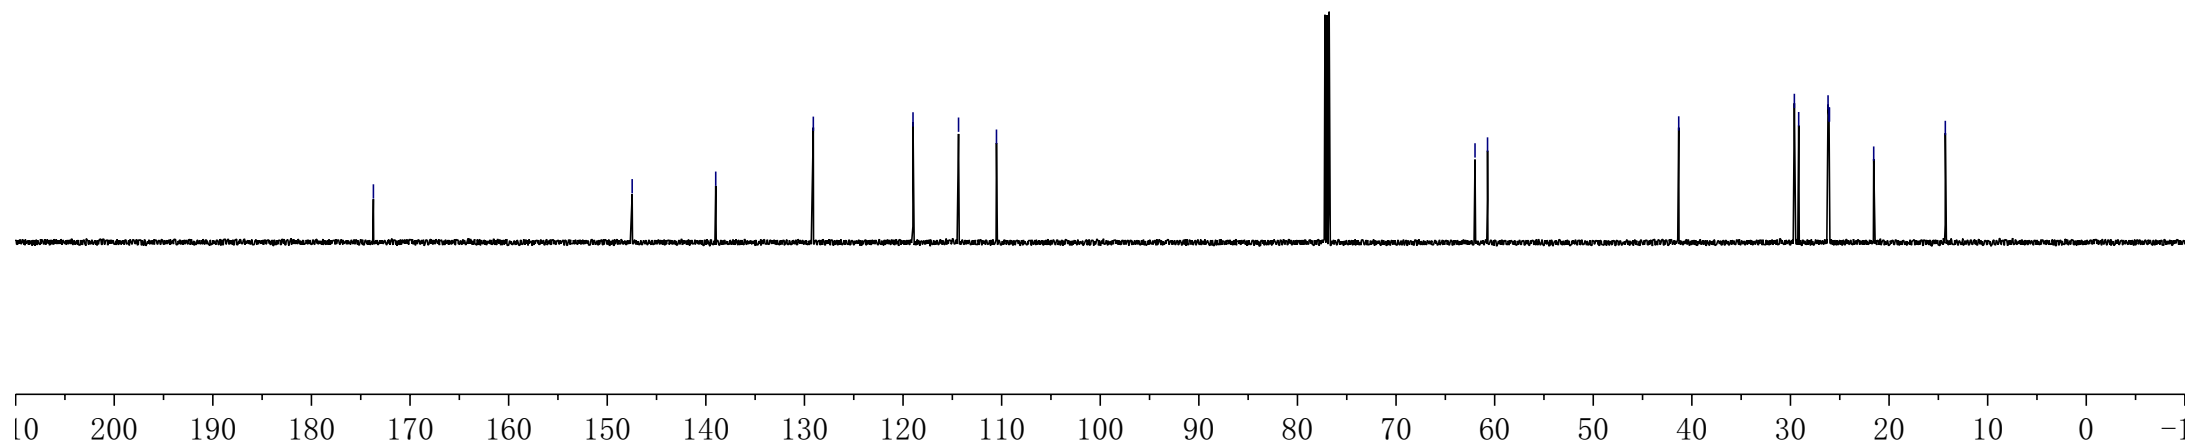



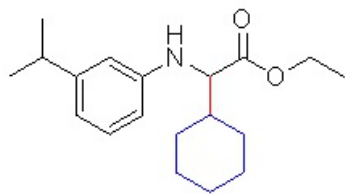

3va

—173.82

—150.06  
—147.46

—129.12

—116.37  
—111.94  
—110.77

—62.06  
—60.72

—41.37  
—34.17  
—29.63  
—29.22  
—26.19  
—26.10  
—26.06  
—23.94  
—23.86

—14.29

S105

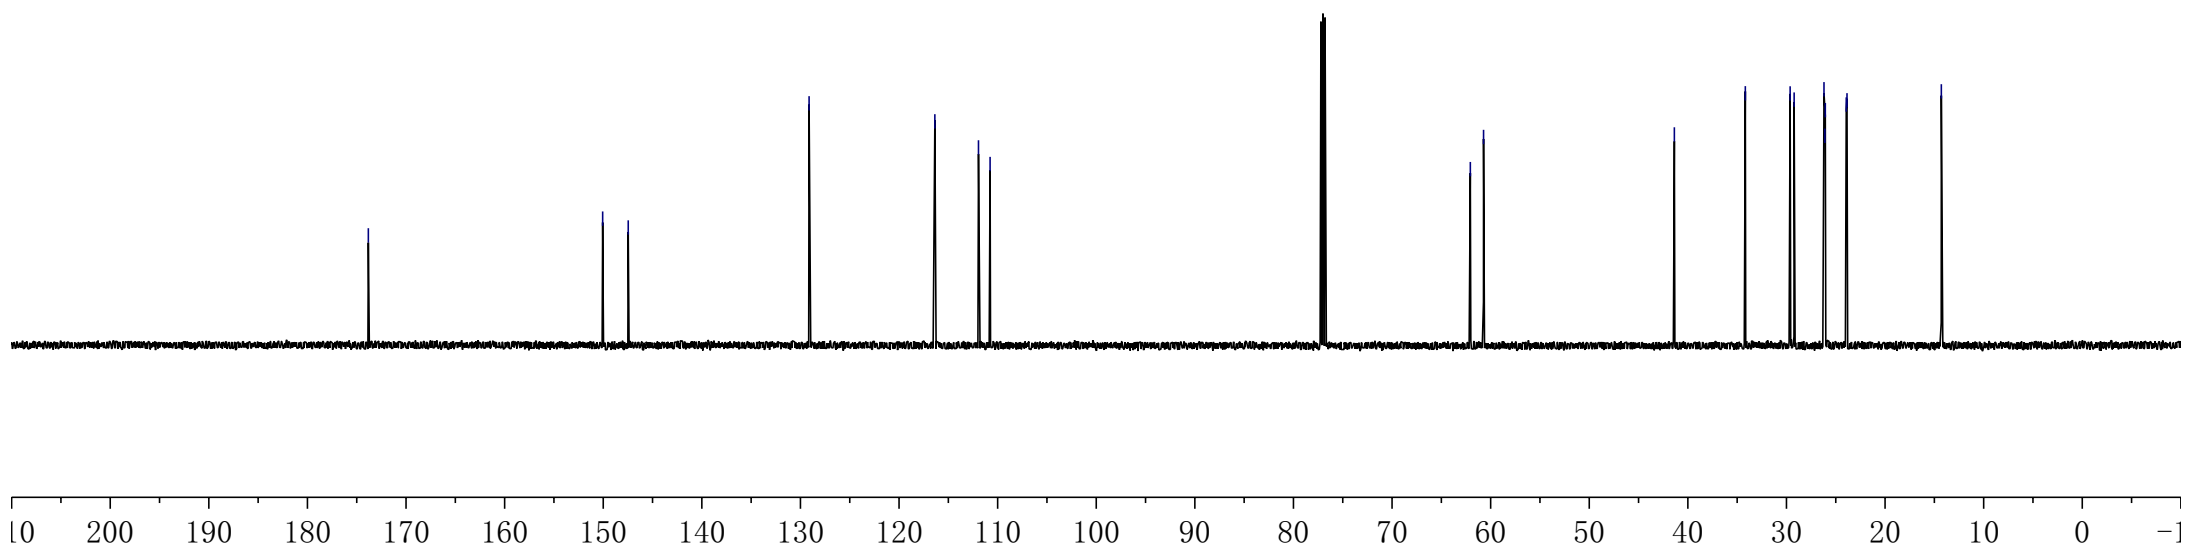

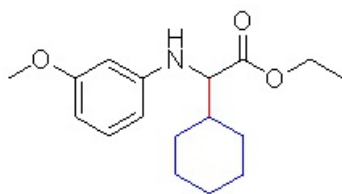

3wa

—173.56

—160.75

—148.82

—129.99

—106.39

—103.33

—99.44

—61.91

—60.80

—55.04

—41.30

—29.57

—29.15

—26.16

—26.07

—26.03

—14.29

S106

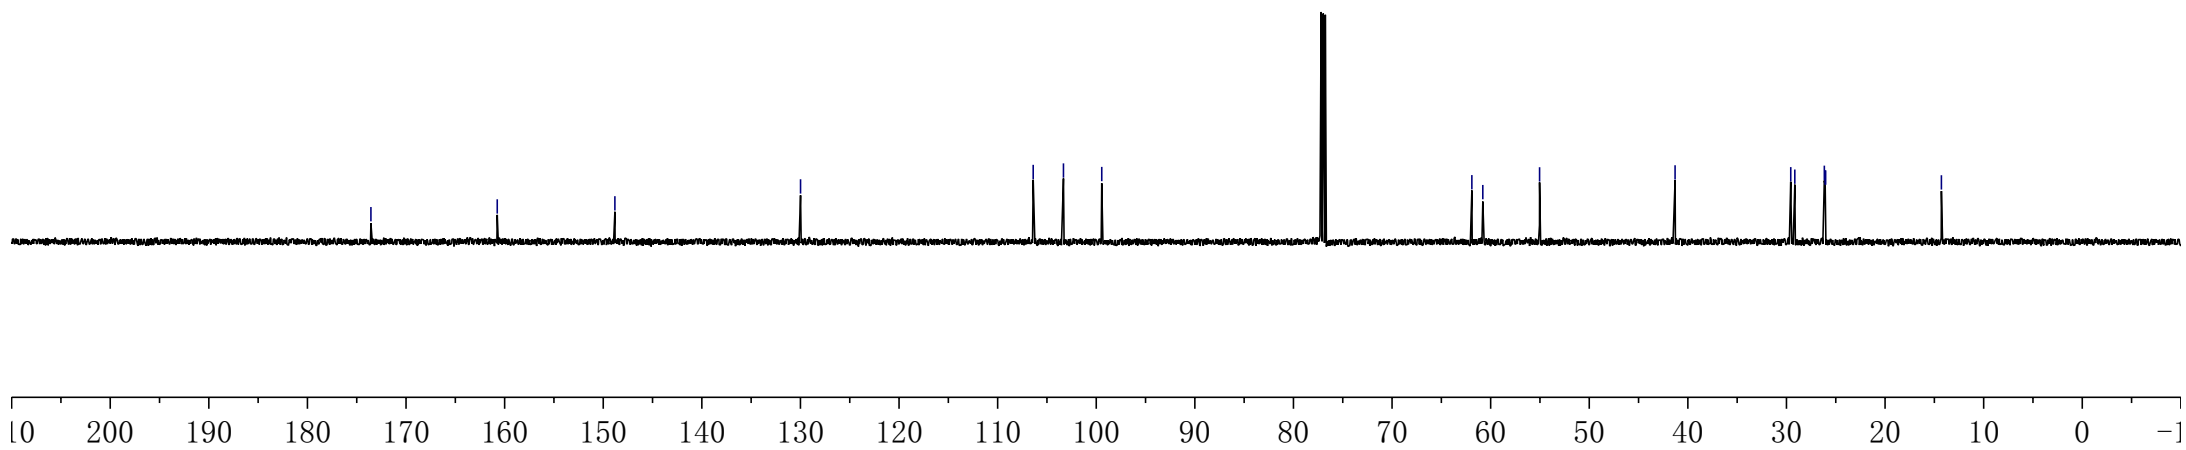

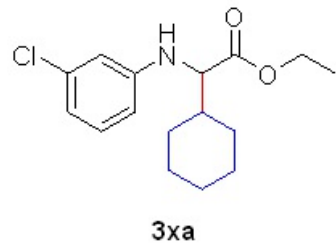

—173.19

—148.58

—134.98

—130.20

~117.90

~113.16

~111.72

~61.74

~60.96

—41.22

~29.55

~29.08

~26.11

~26.02

~25.98

—14.28

S107

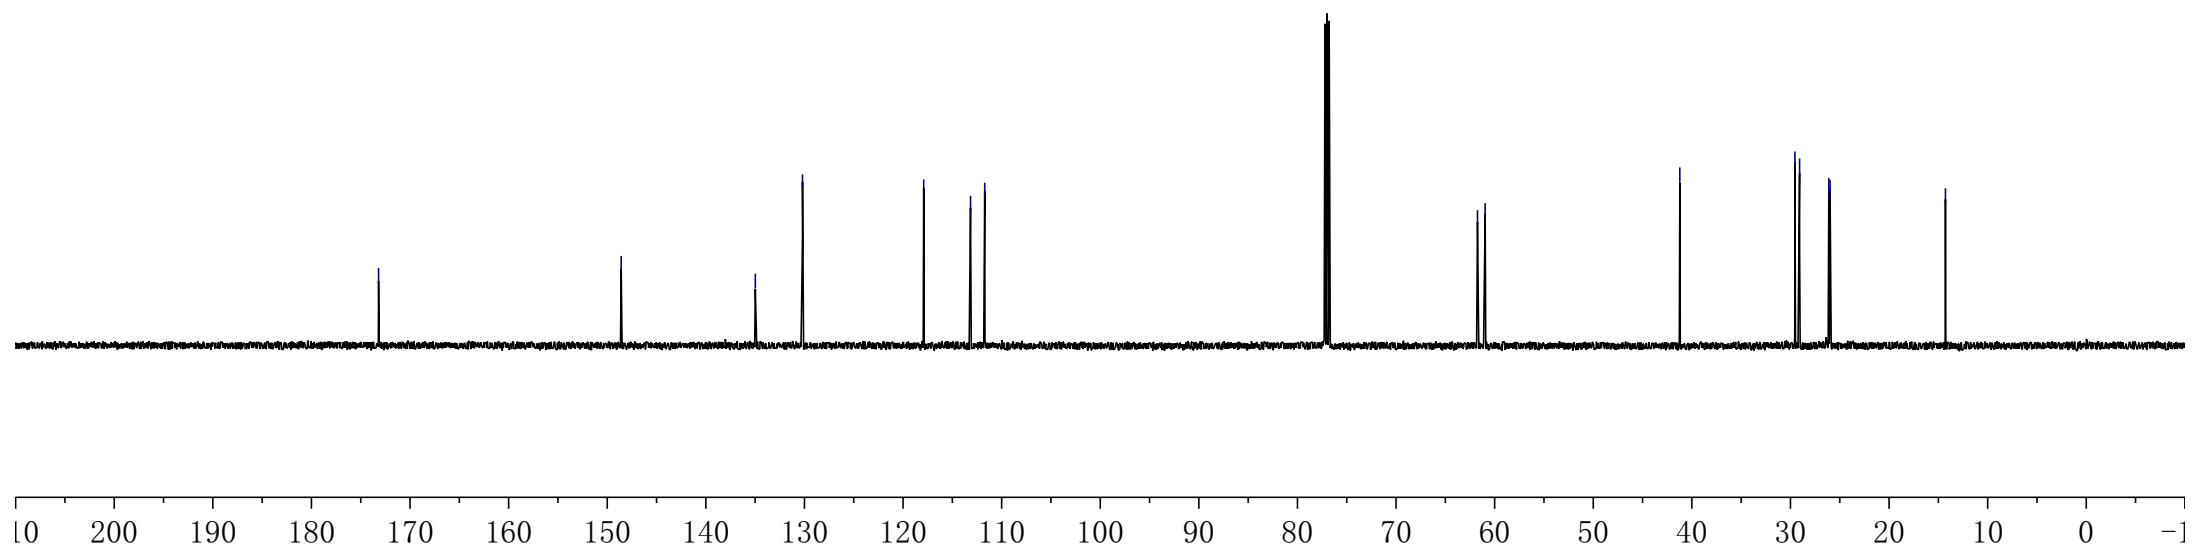

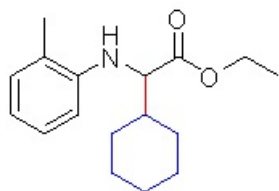

3ya

—173.81

—145.40

130.28

127.01

122.68

117.57

—110.42

61.89

60.78

—41.35

29.60

29.29

26.21

26.13

26.06

—17.49

—14.27

S108

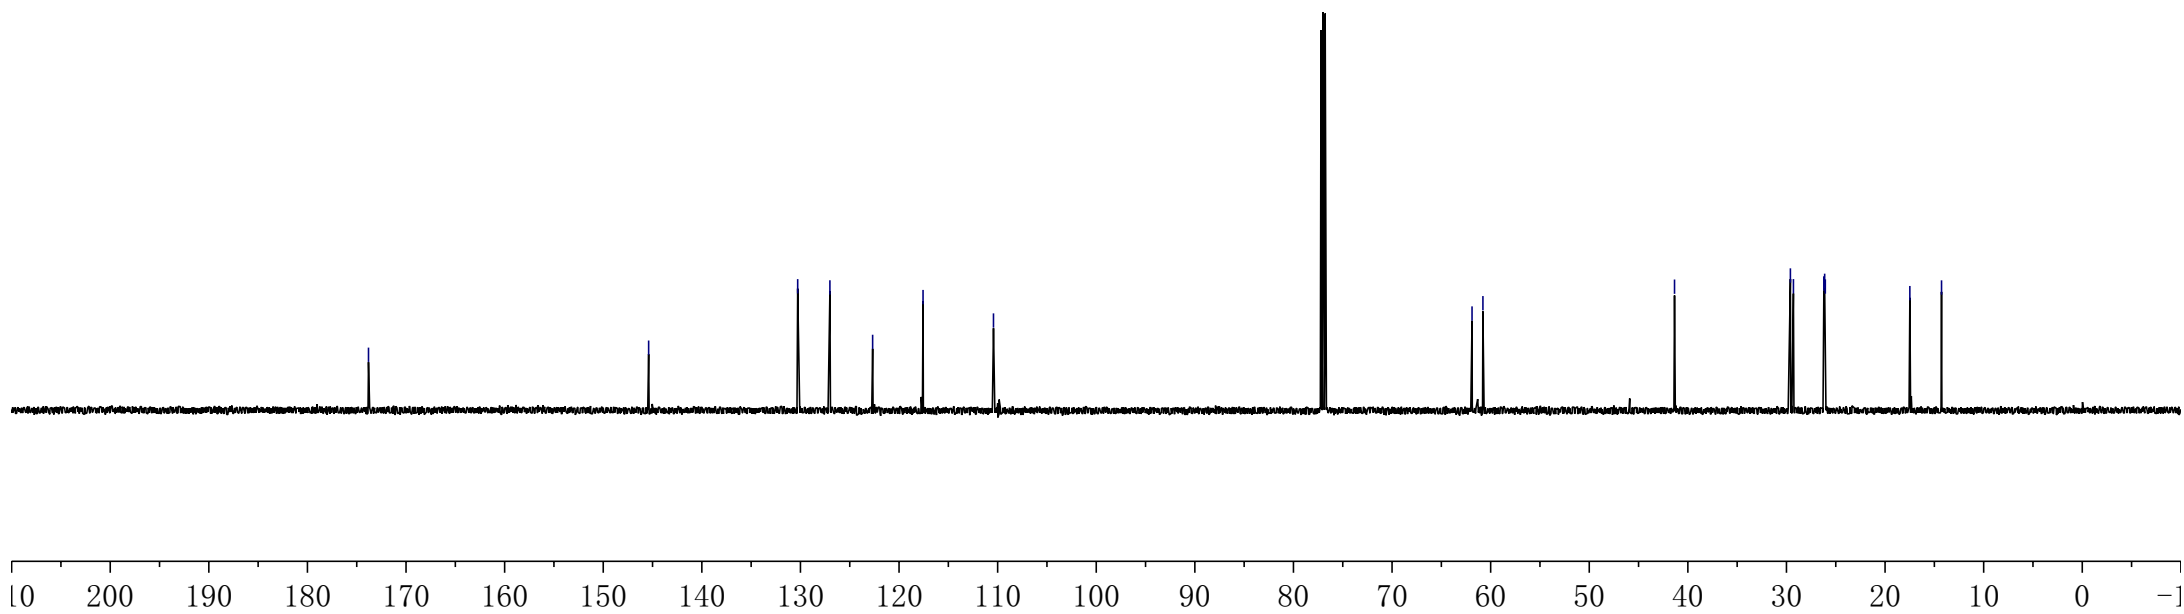

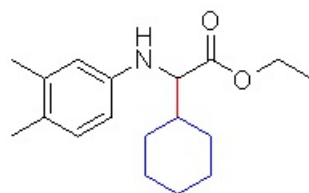

3za

—173.91

—145.58

—137.28

—130.25

—126.07

—115.49

—110.85

—62.33  
—60.66

—41.33

—29.63  
—29.16

—26.21  
—26.09

—26.06

—19.98  
—18.65

—14.31

S109



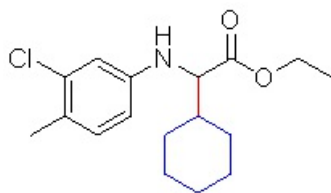

3aaa

—173.43

—146.56

—134.76

—131.26

—124.97

—113.87

—112.26

—62.12

—60.87

—41.23

—29.58

—29.09

—26.14

—26.04

—26.00

—18.84

—14.29

S110



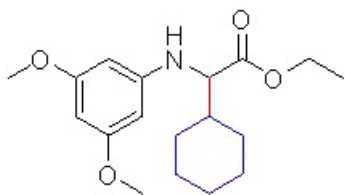

**3aba**

—173.52

—161.66

—149.34

—92.21

—90.47

—61.81

—60.82

—55.11

—41.29

—29.55

—29.14

—26.15

—26.06

—26.02

—14.30

S111

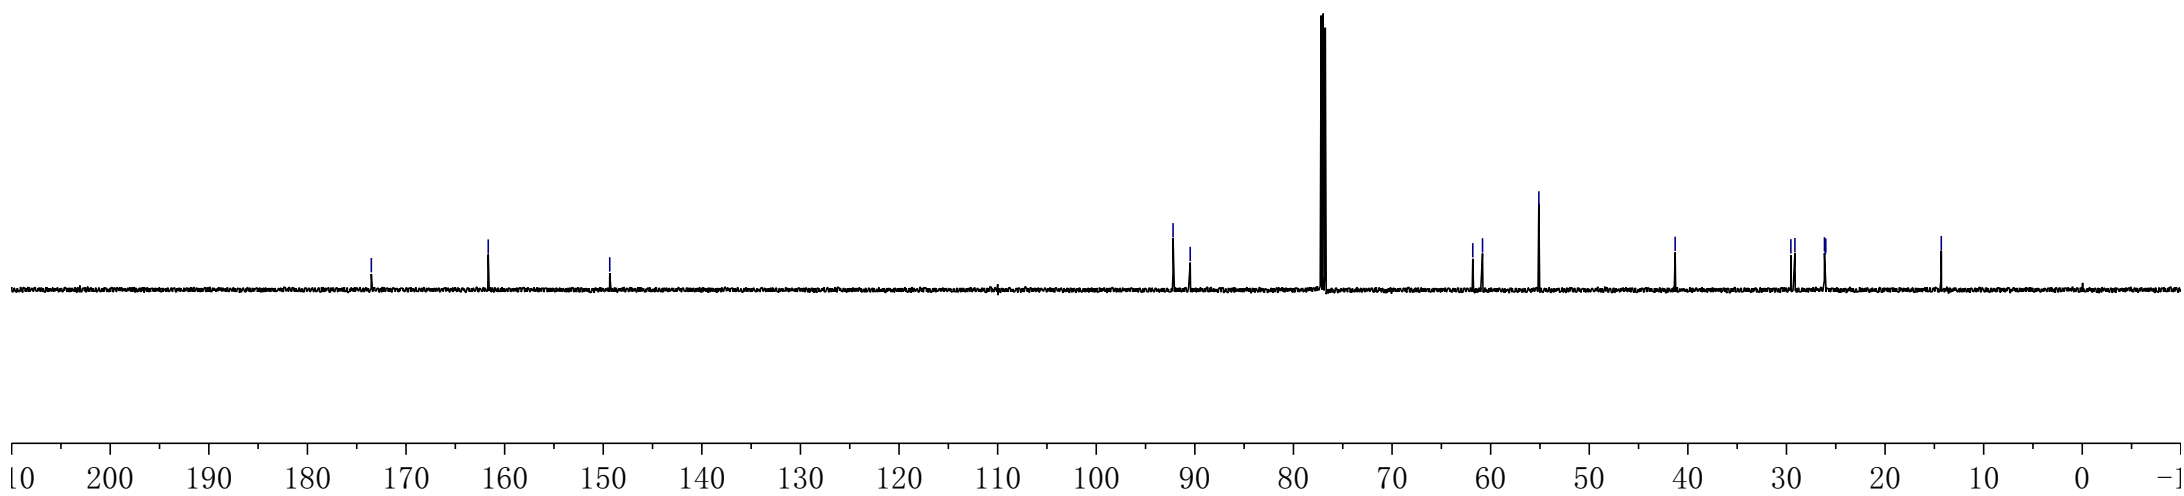

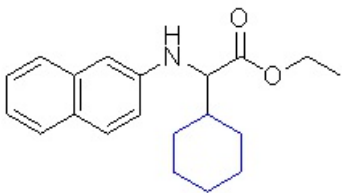

3aca

—173.59

—145.08

—134.98

129.02

127.80

127.56

126.28

125.98

122.23

118.22

—105.43

61.96

60.85

—41.26

29.62

29.30

26.19

26.10

26.05

—14.31

S112

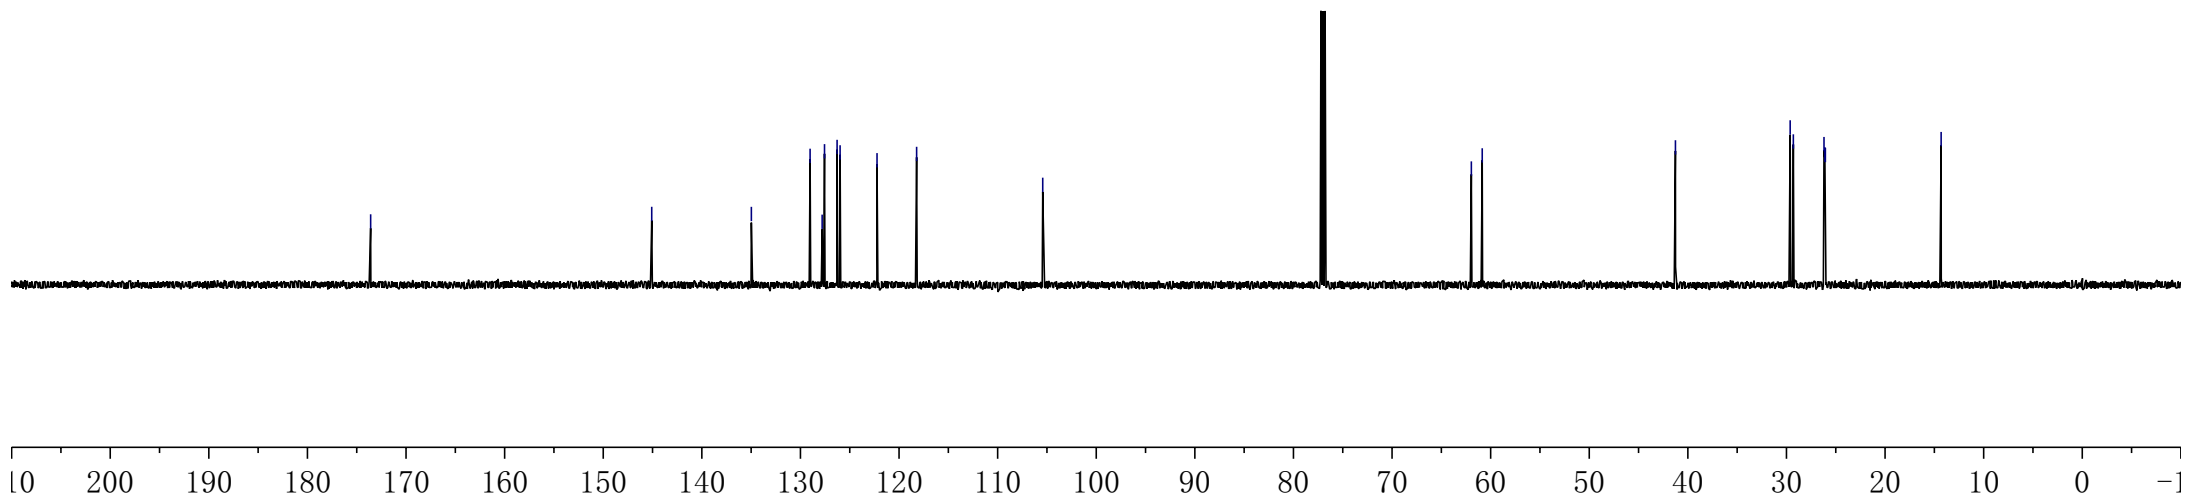



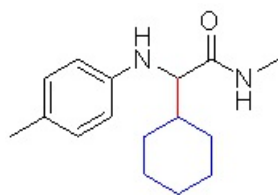

3ada

—173.45

—145.14

~129.85  
~128.23

—113.60

—65.12

—41.06

30.32  
28.05  
26.25  
26.22  
26.10  
25.86  
—20.32

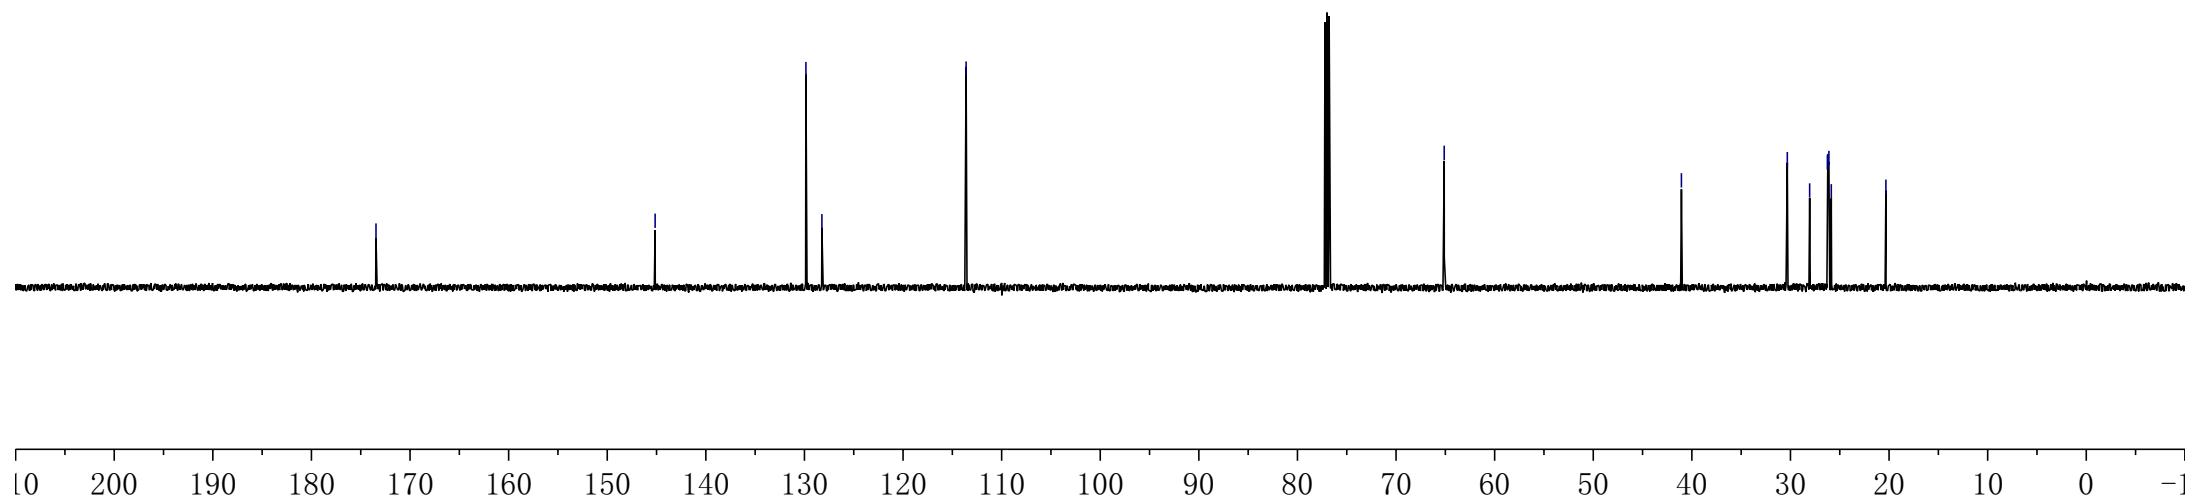

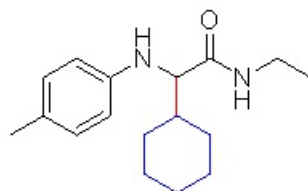

3aea

—172.52

—145.23

~129.80  
~128.19

—113.68

—65.20

—41.04

33.91

30.34

27.97

26.27

26.22

26.12

—20.32

—14.91

S114



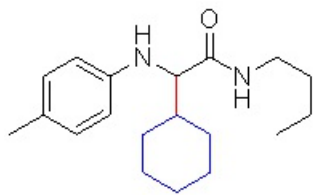

3afa

—172.59

—145.21

~129.79  
~128.21

—113.71

—65.26

41.02

38.82

31.66

30.35

27.98

26.27

26.23

26.13

20.33

20.00

S115



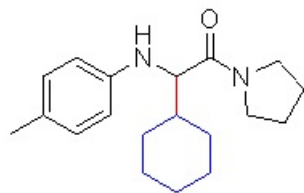

3aga

—171.88

—146.06

—129.69  
—126.84

—113.94

—61.21

—46.61  
—45.72  
—41.96

—30.17  
—29.01  
—26.29  
—26.28  
—26.17  
—26.08  
—24.07  
—20.33

S116



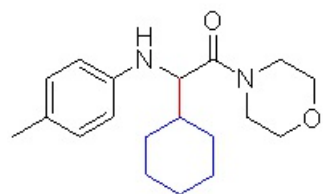

**3aha**

—172.01

—145.83

—129.75  
—127.41

—114.25

67.00  
66.64

—58.95

46.25  
42.38  
41.93

30.30  
28.76  
26.24  
26.18  
26.13  
—20.35

S117

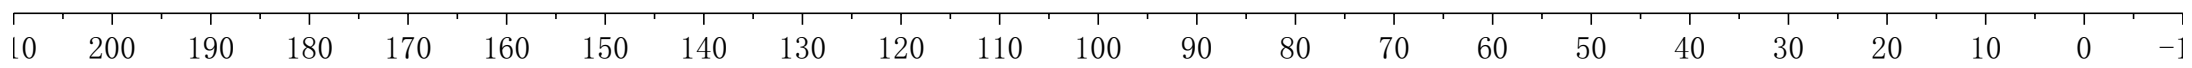

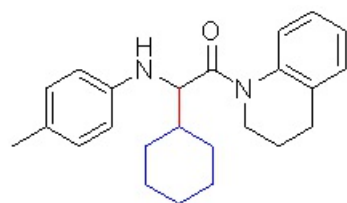

3aia

—173.77

—145.20

—138.88

—134.67

—130.87

—129.61

—128.81

—128.35

—126.81

—126.39

—125.89

—124.74

—114.00

—59.08

—42.62

—29.90

—29.12

—26.52

—26.27

—26.19

—24.07

—20.36

—19.17

—13.71

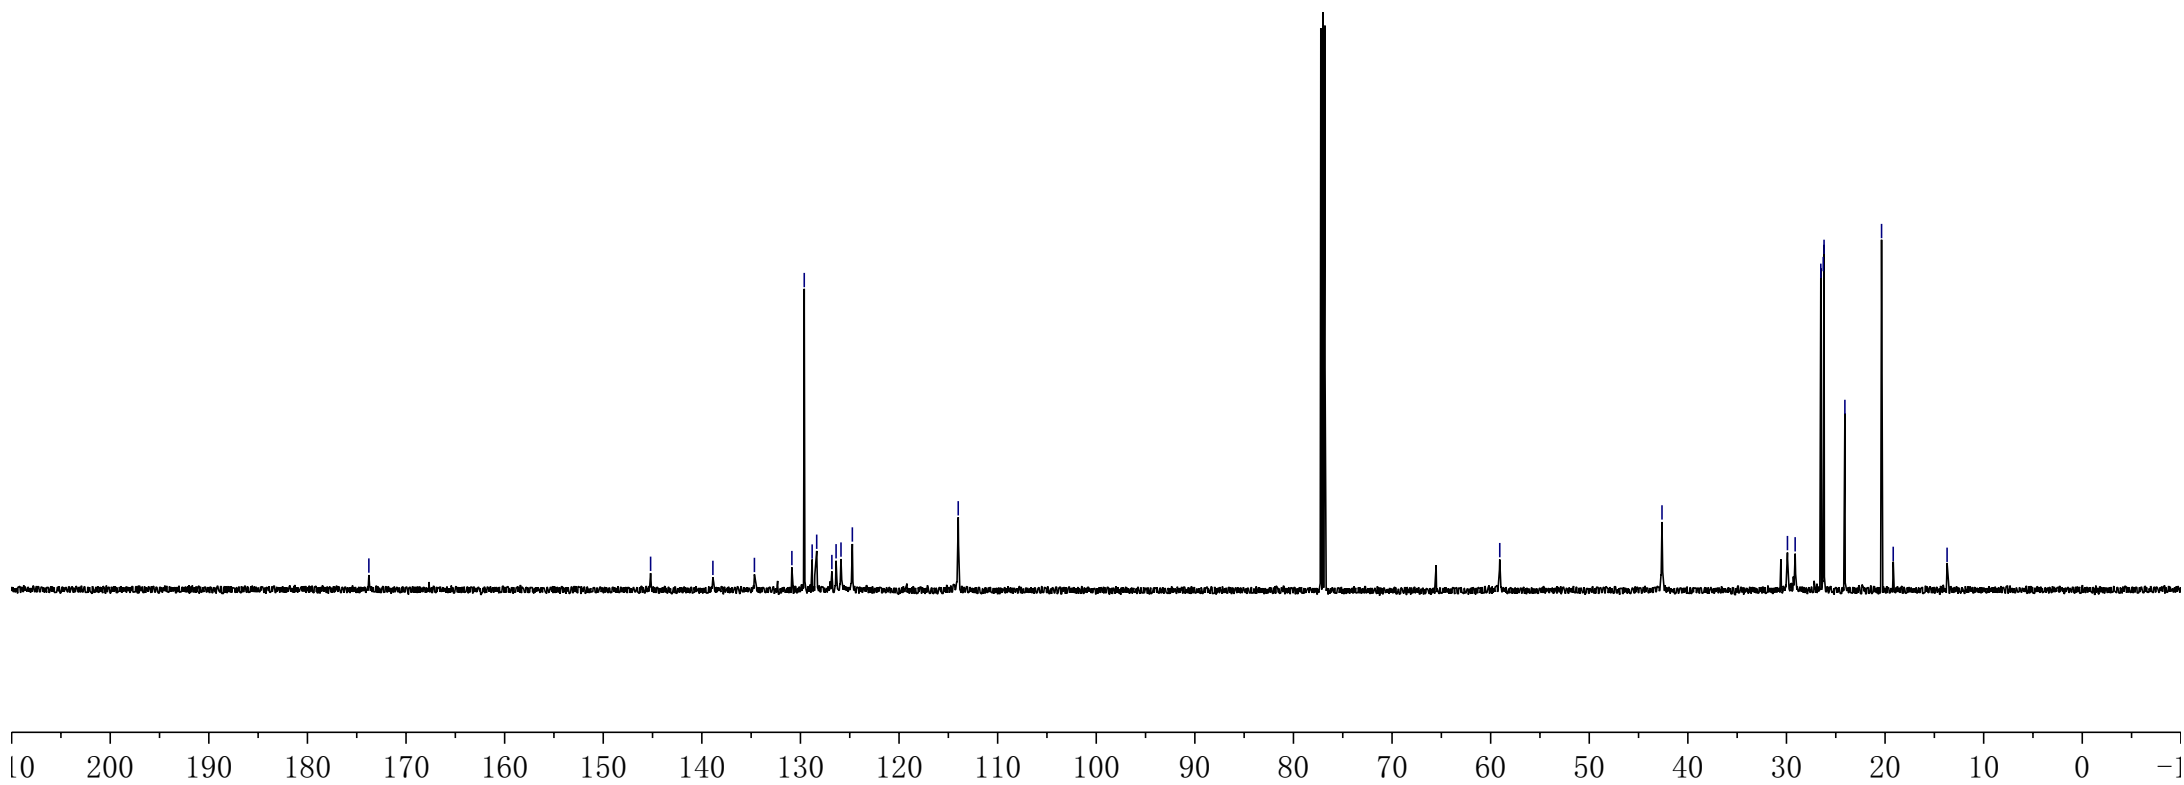

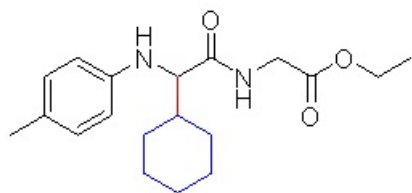

3aja

—173.38  
—169.62

—145.08

—129.82  
—128.29

—113.75

—65.06  
—61.34

—41.17  
—41.02

—30.23  
—27.95  
—26.25  
—26.21  
—26.10  
—20.34

—14.06

S119

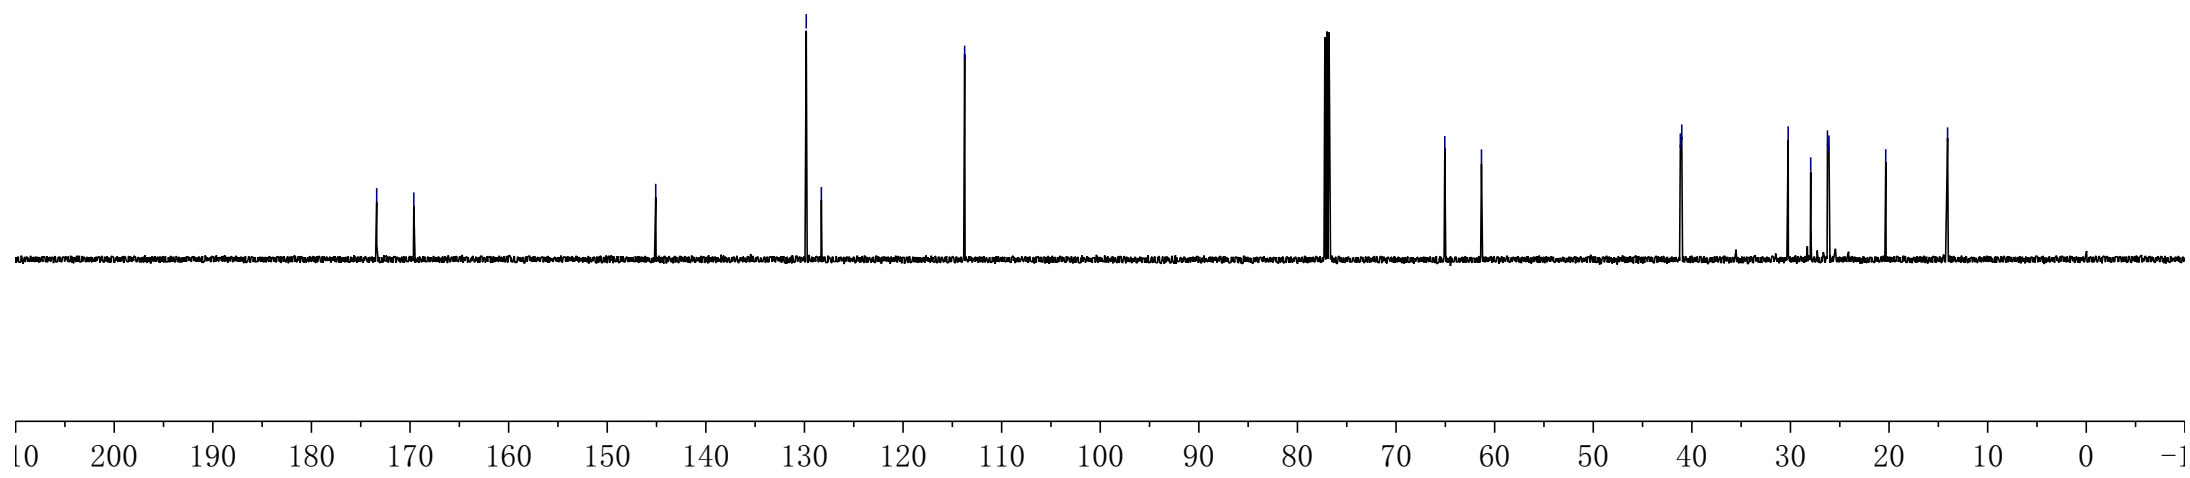

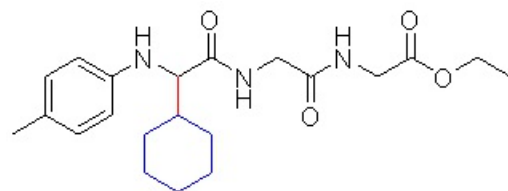

3aka

—173.94  
—169.37  
—169.03

—144.85

—129.92  
—128.27

—113.62

—64.82  
—61.47

—42.82  
—41.15  
—41.10

—30.19  
—28.41  
—26.18  
—26.16  
—26.06  
—20.31

—14.10

S120

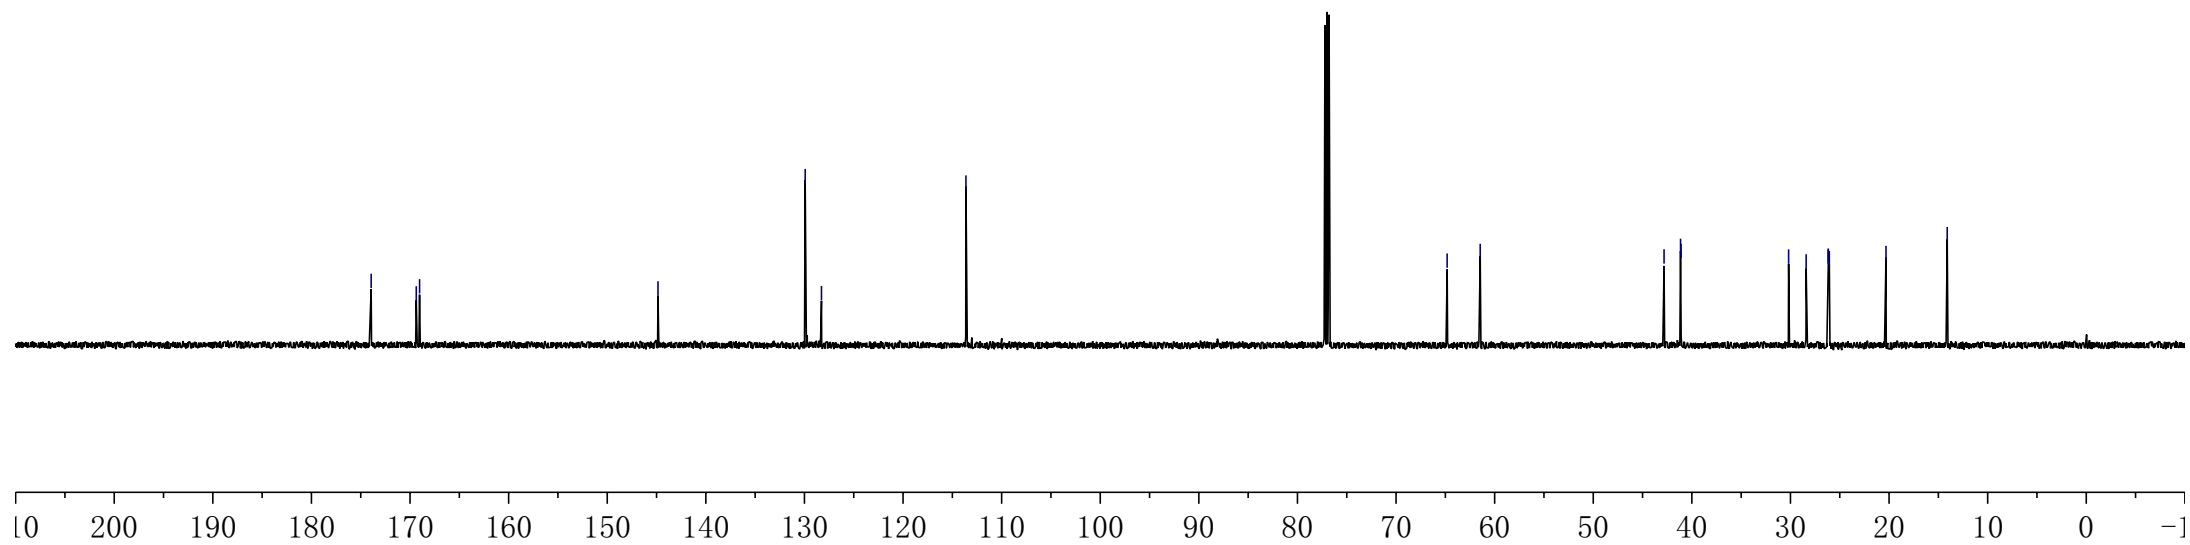



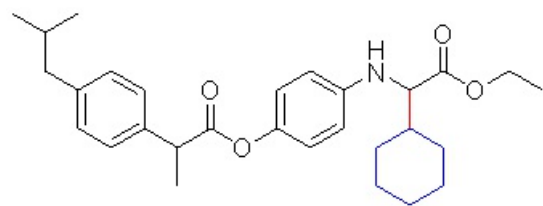

3ala

173.68  
173.51

145.22  
142.68  
140.62  
137.46

129.39  
127.18  
121.91  
113.85

62.44  
60.82

45.18  
45.03  
41.23

30.16  
29.56  
29.15  
26.16  
26.05  
26.01  
22.38  
18.56  
14.28

S121



—201.80

—152.54

—142.45

—136.19

—133.35

—128.77

—128.26

—115.73

—114.85

—64.74

—55.72

—41.84

—30.89

—27.71

—26.39

—26.15

—26.03

S122

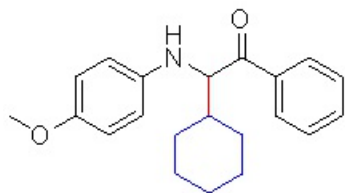

3ama

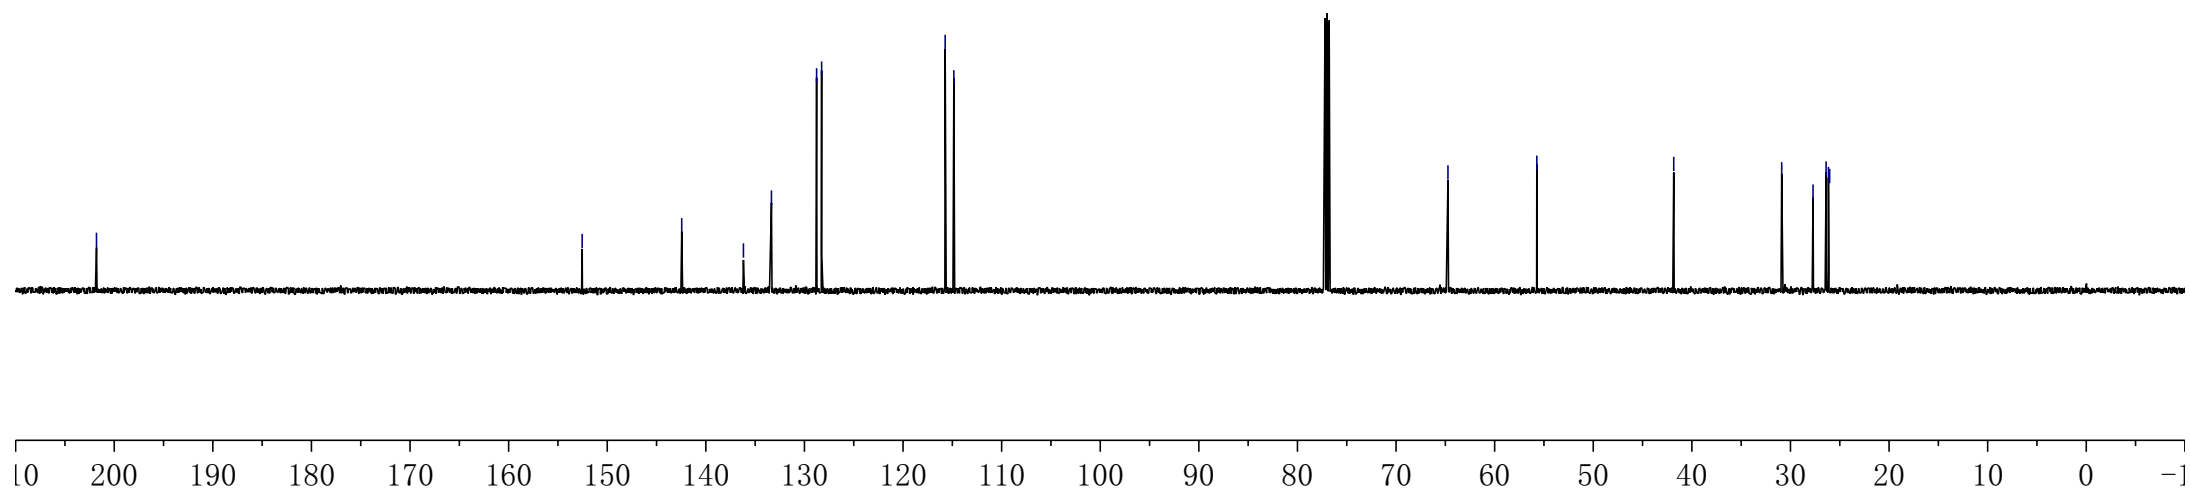

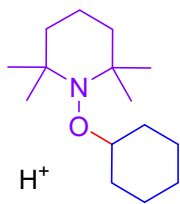

G:\17.16\hcd-wangjiayuan-1

2020/6/9 17:07:22  
Error = 0.8 ppm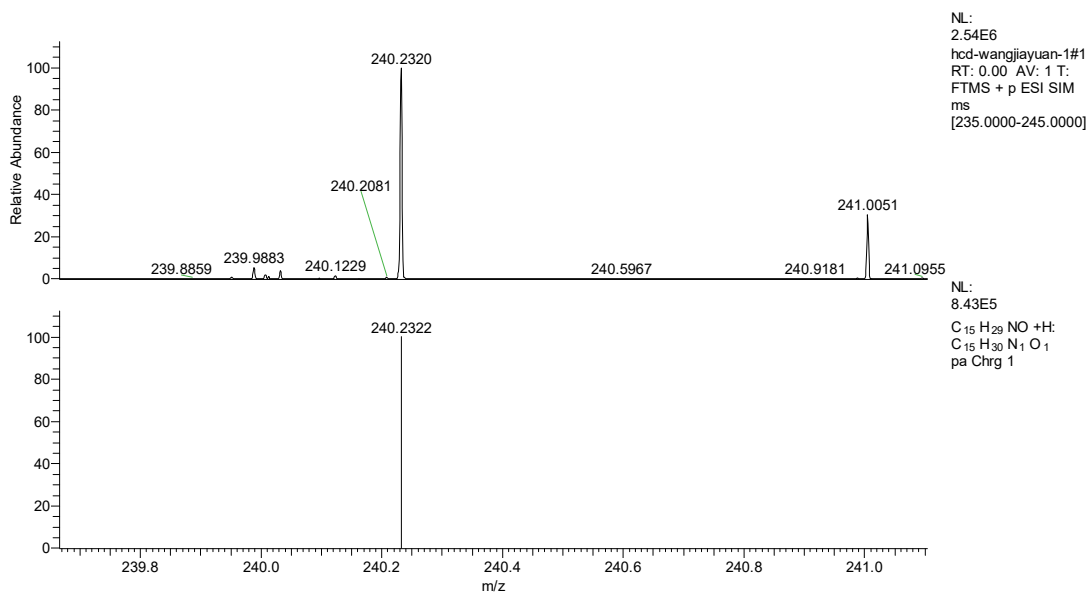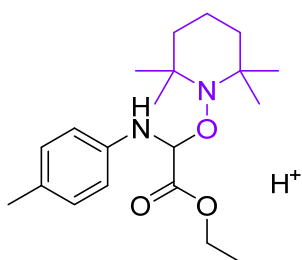

G:\17.16\hcd-wangjiayuan-1

2020/6/9 17:07:22  
Error = 1.4 ppm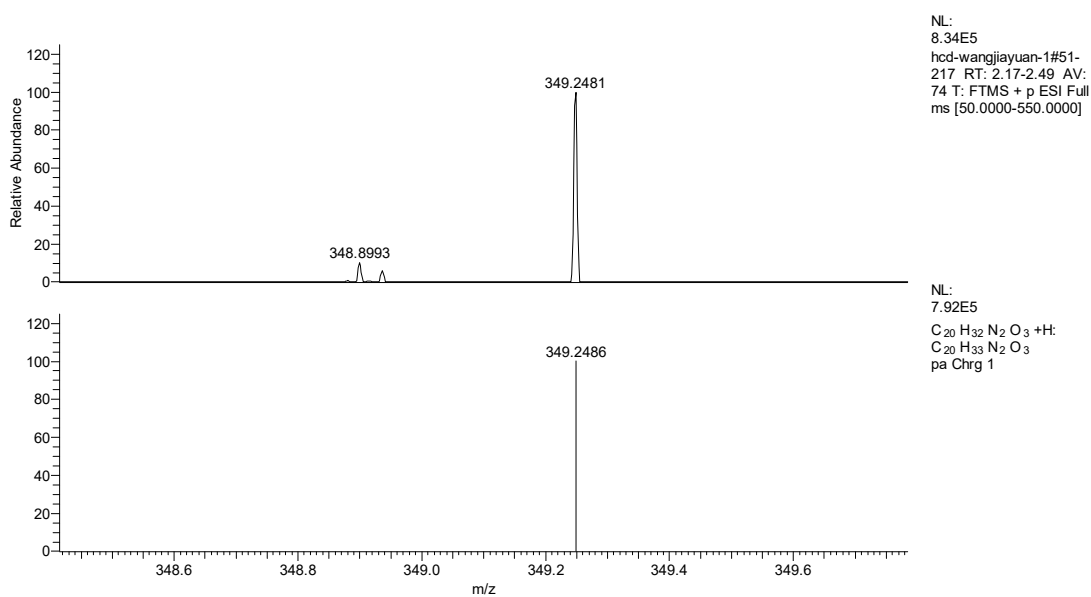

Supplement: d0cc07688k1.pdf [file d0cc07688k1.pdf]
